# Supplementary material for: 'Palaeoshellomics’ reveals the use of freshwater mother-of-pearl in prehistory
Source: eLife journal article supplement (doi:10.7554/elife.45644), 2019-05-06

# 1. Hic74 [*Unio crassus*]

## 1.1 Position (AA): **172**; Mutation **E** → **Q**

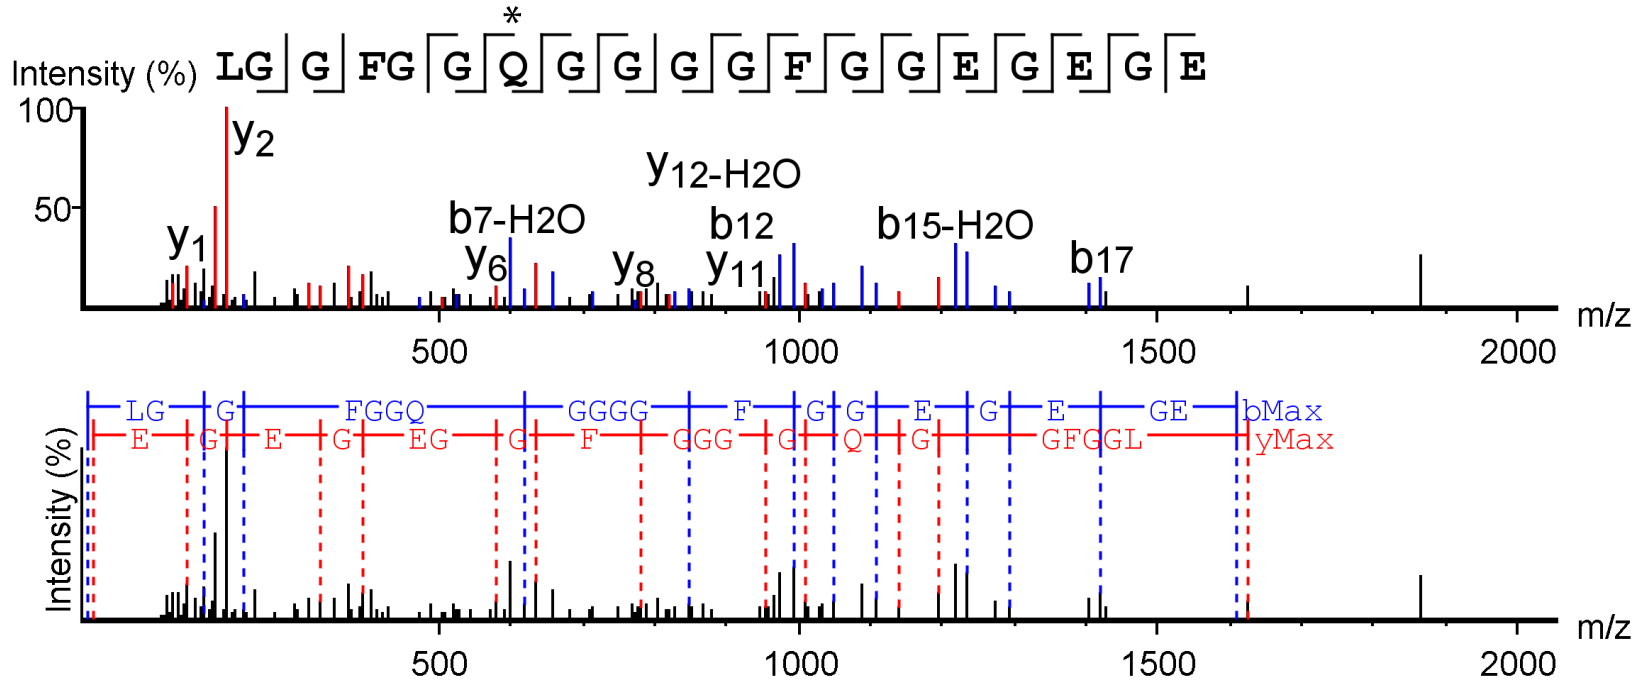

## 1.2 Position (AA): **310**; Mutation **I** → **F**

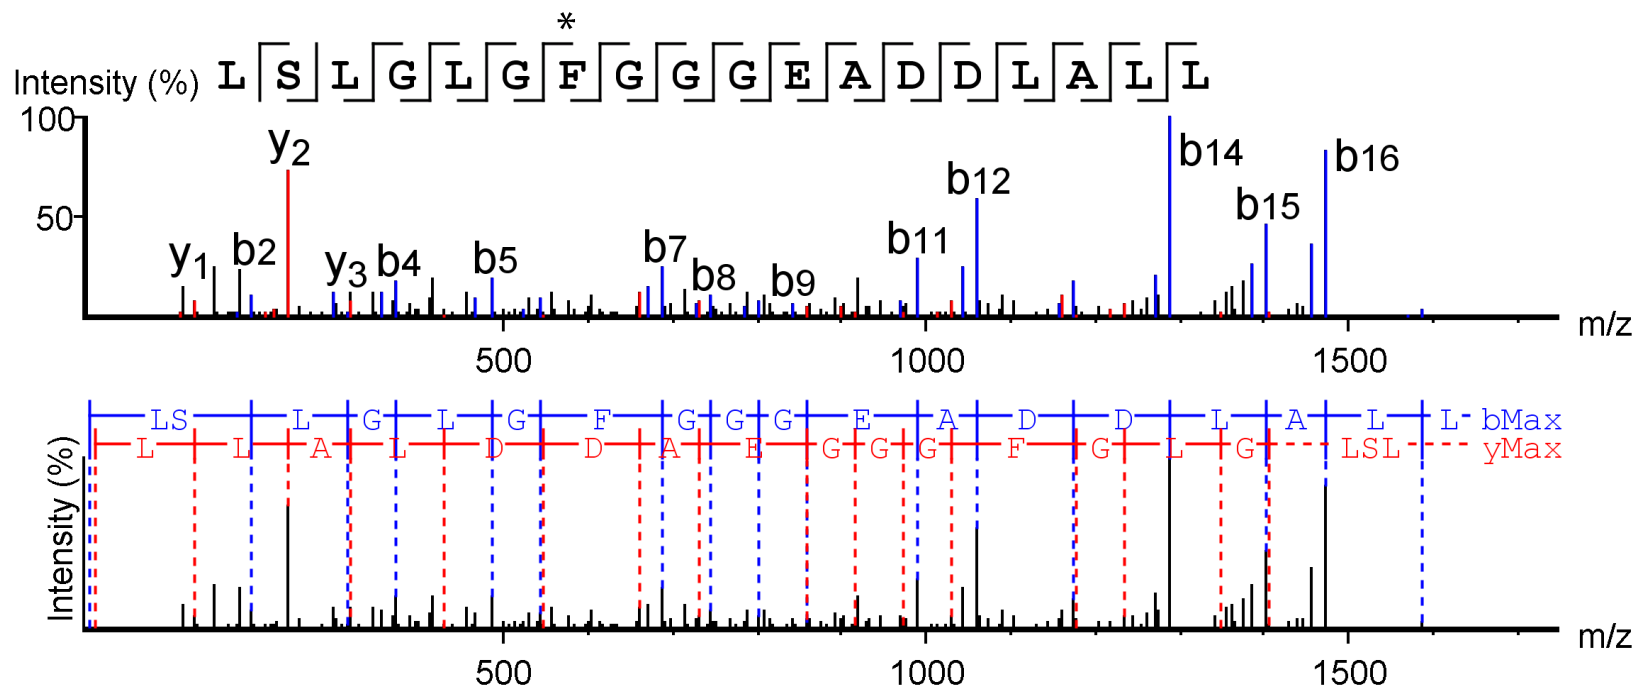

### 1.3 Position (AA): **310**; Mutation **I** → **F**

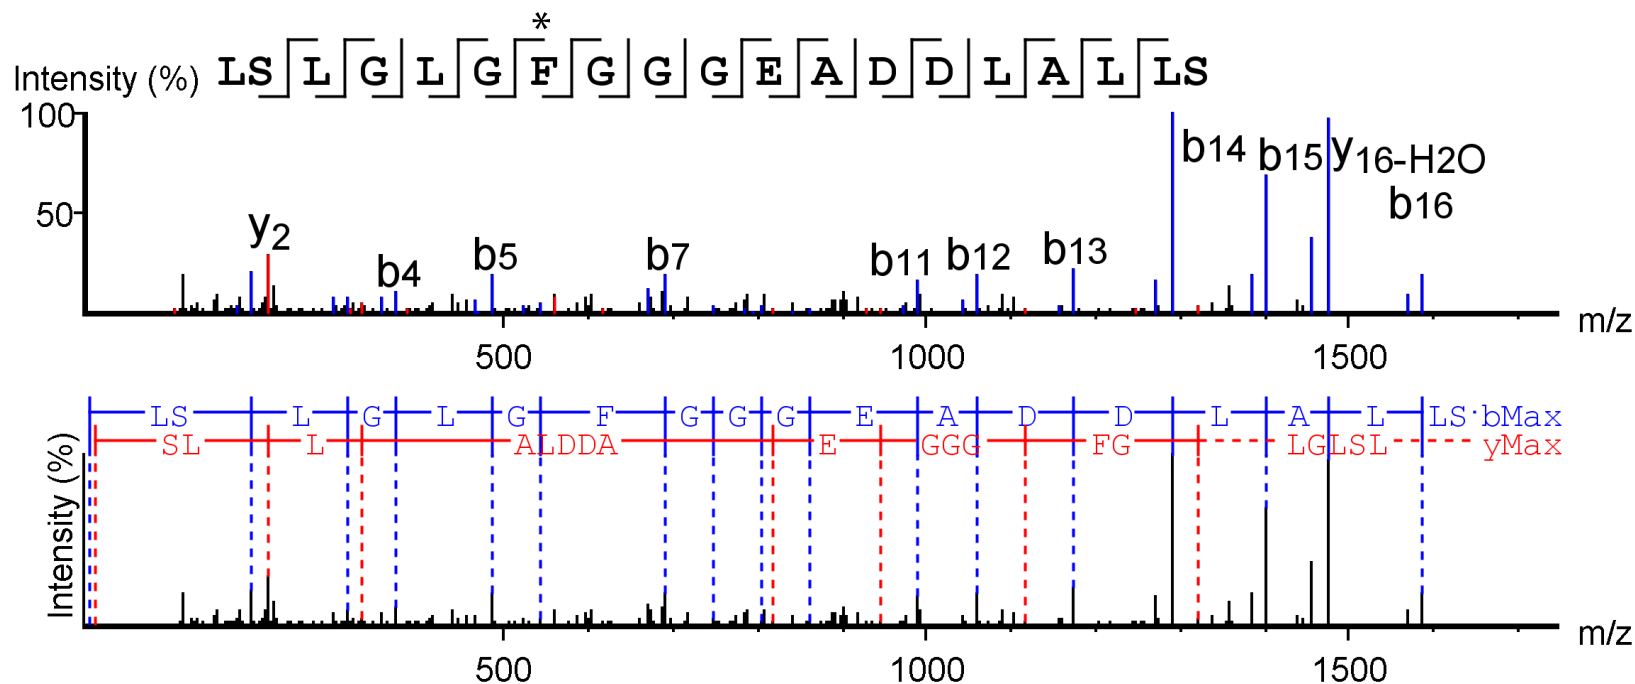

## 2. Hic74 [*Unio pictorum*]

### 2.1 Position (AA): **172**; Mutation **E** → **Q**

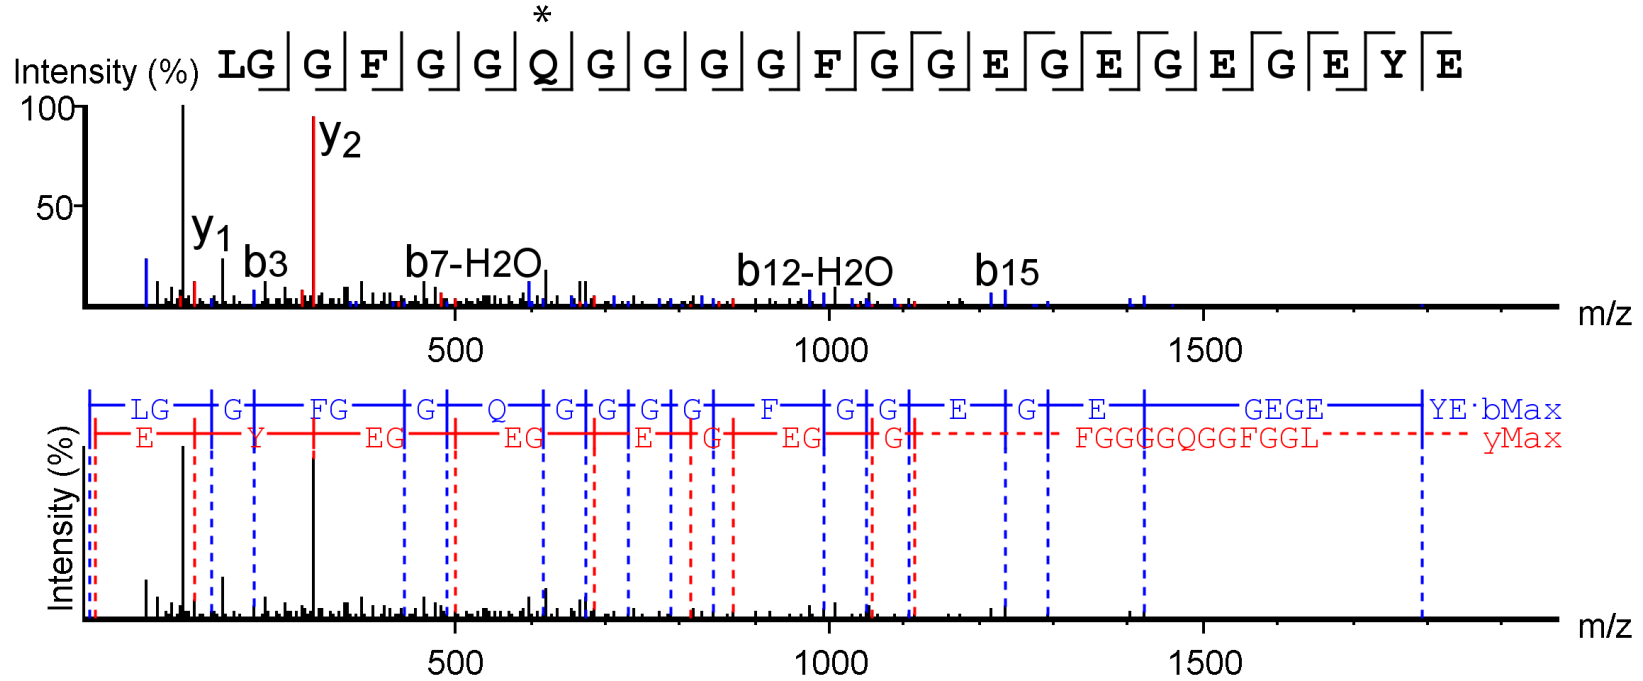

2.2 Position (AA): **310**; Mutation **I** → **F**

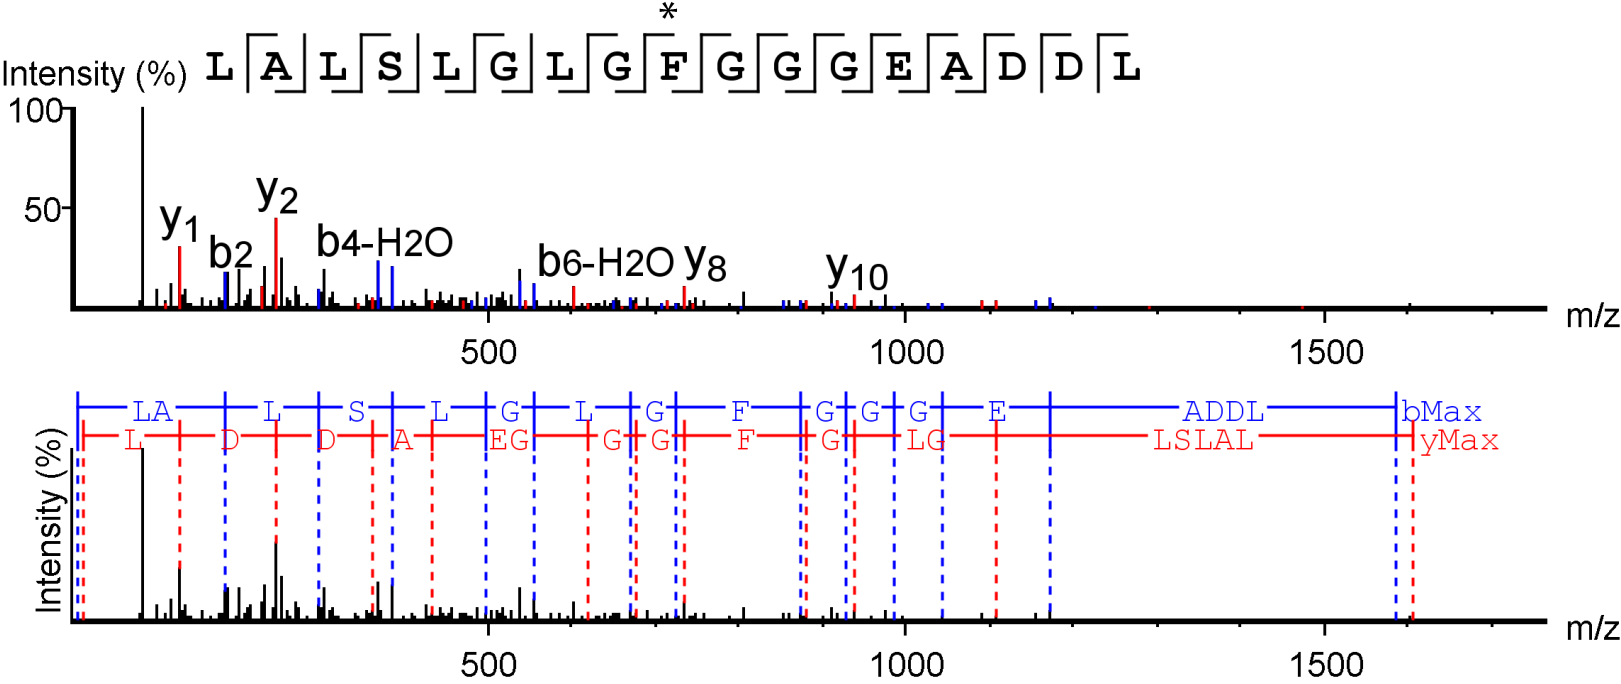

2.3 Position (AA): **310**; Mutation **I** → **F**

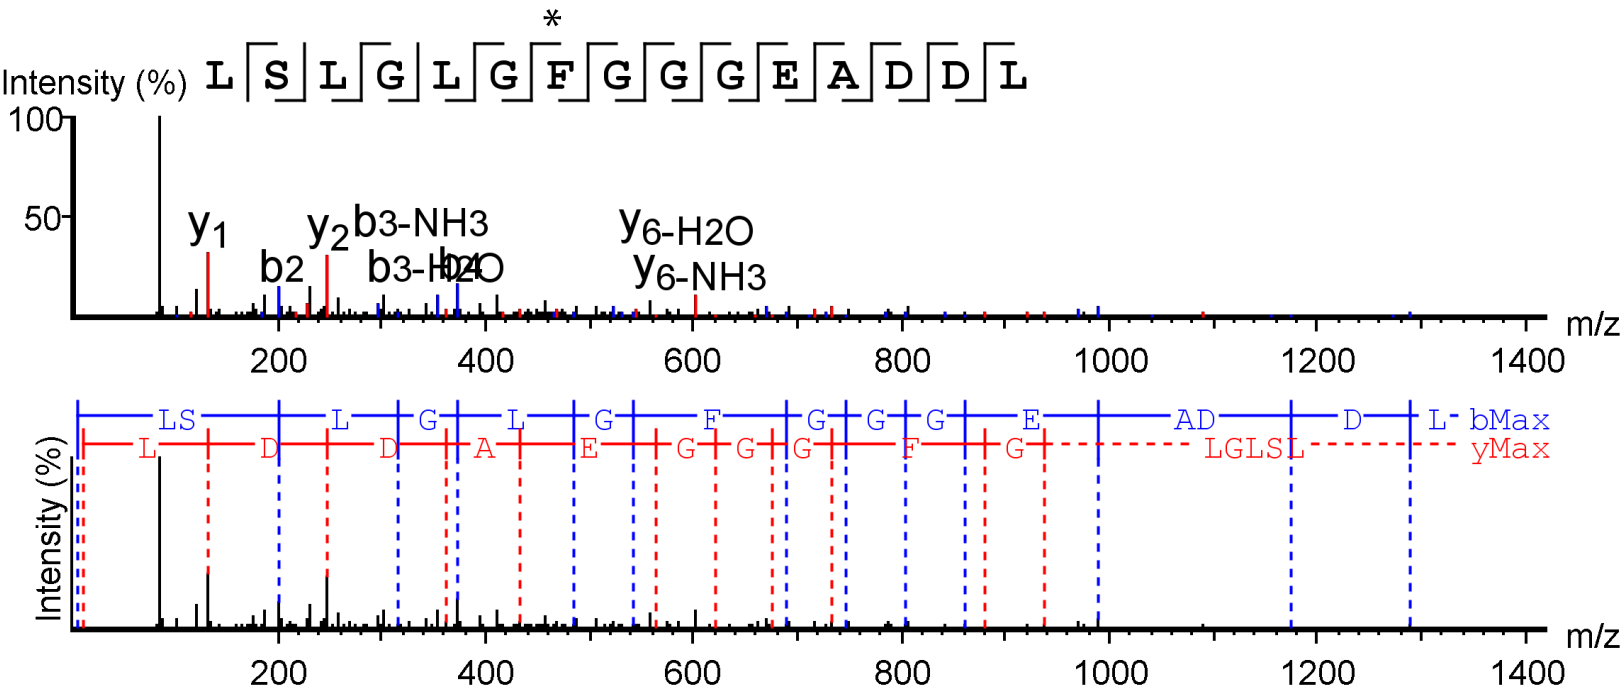

2.4 Position (AA): **801**; Mutation **G** → **S**  
**804**; Mutation **A** → **S**

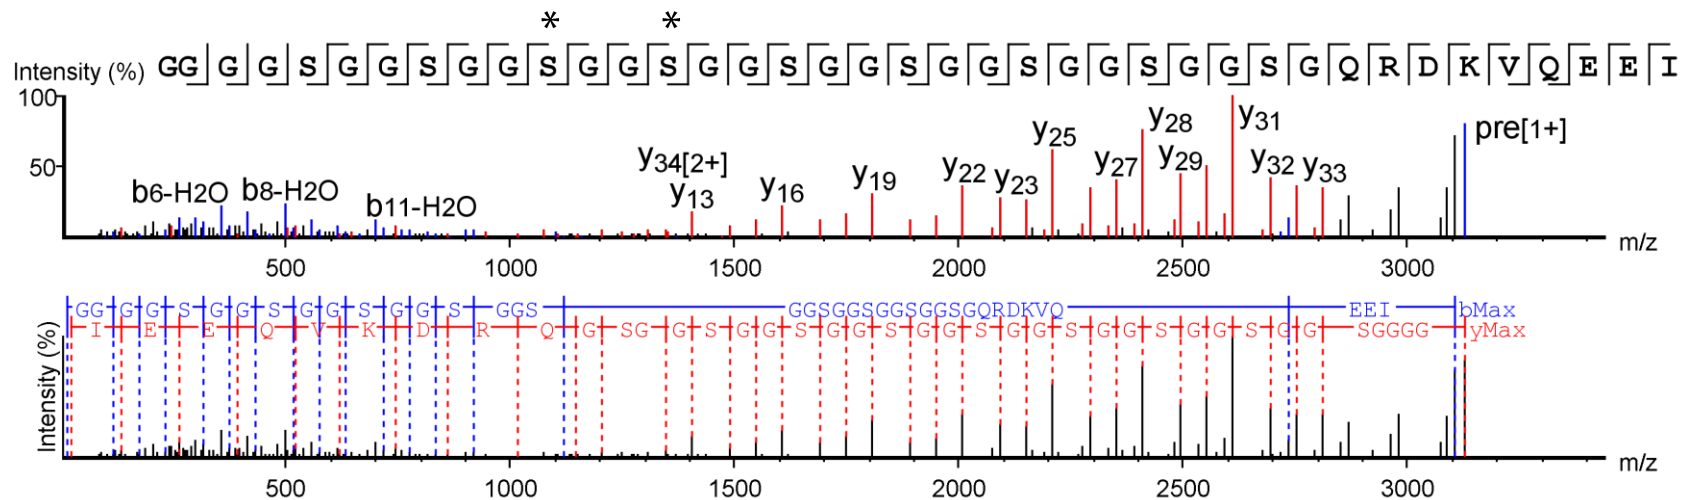

2.5 Position (AA): **801**; Mutation **G** → **S**  
**804**; Mutation **A** → **S**

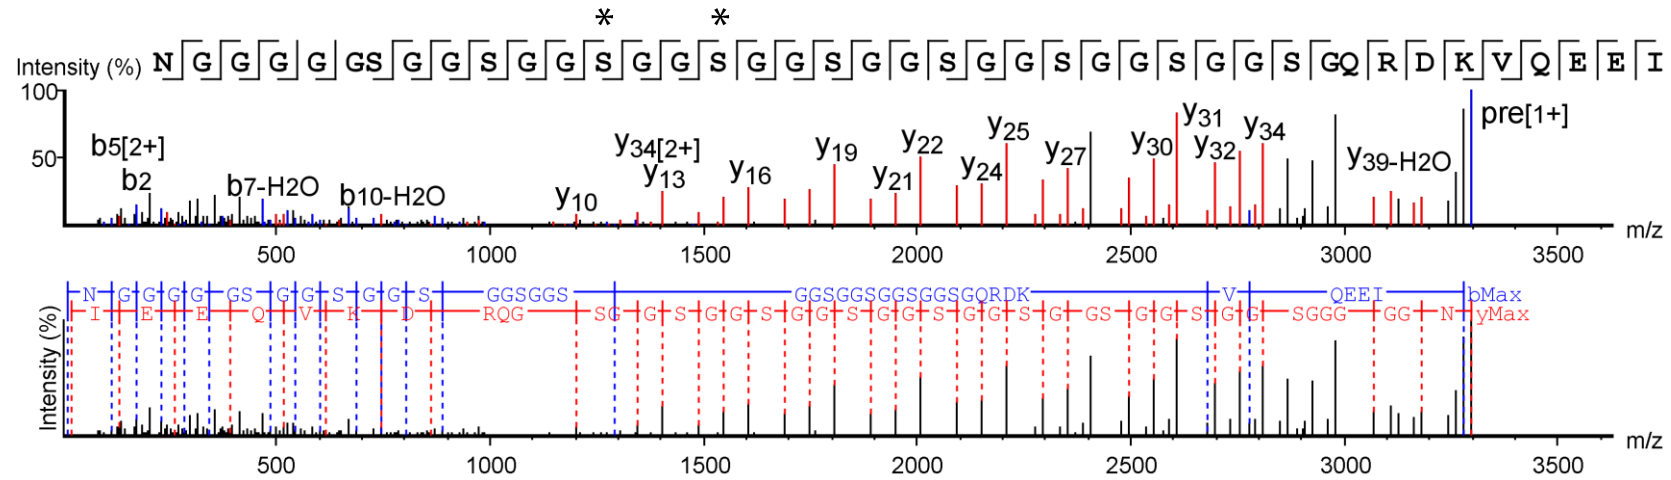

### 3. Hic74 [*Margaritifera margaritifera*]

#### 3.1 Position (AA): **172**; Mutation **E** → **Q**

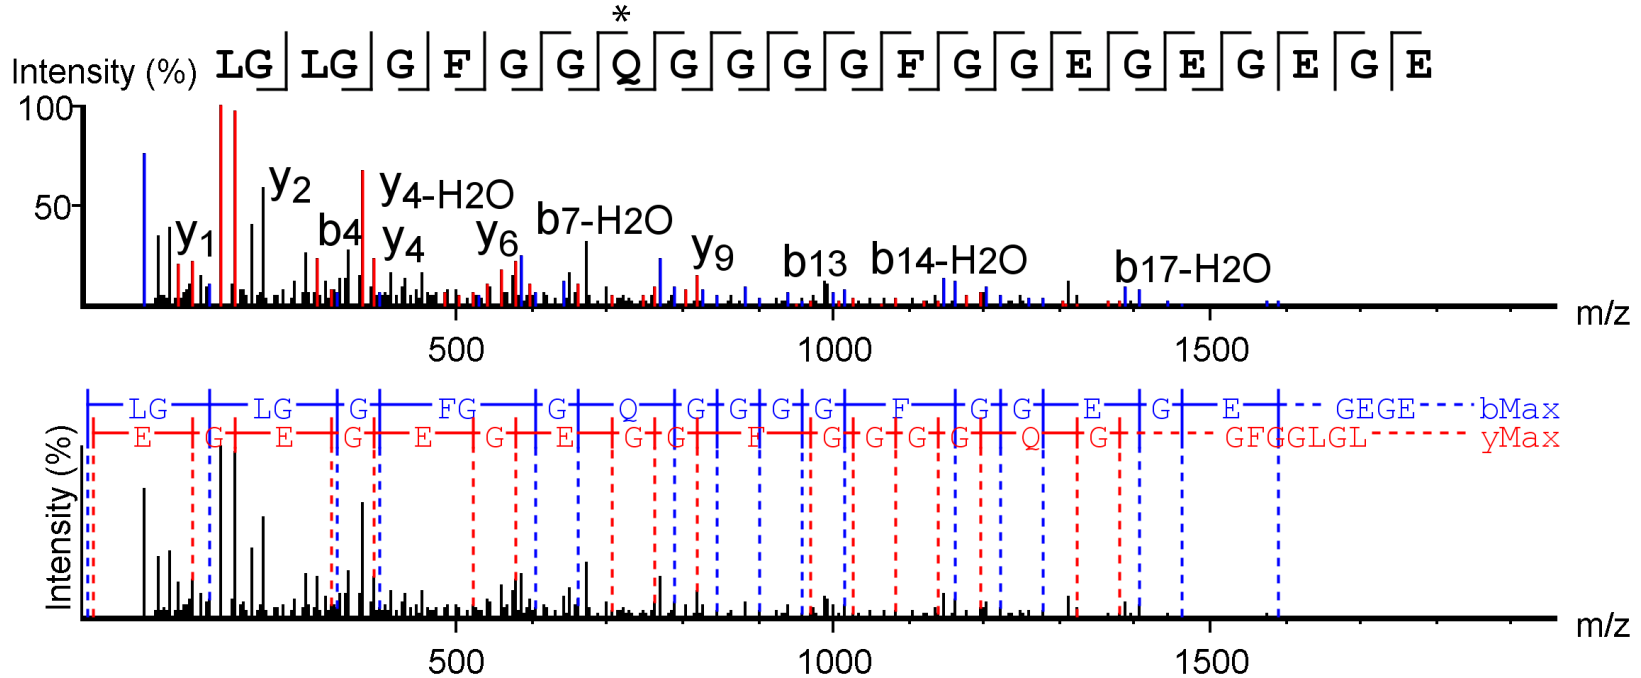

3.2 Position (AA): **172**; Mutation **E** → **Q**

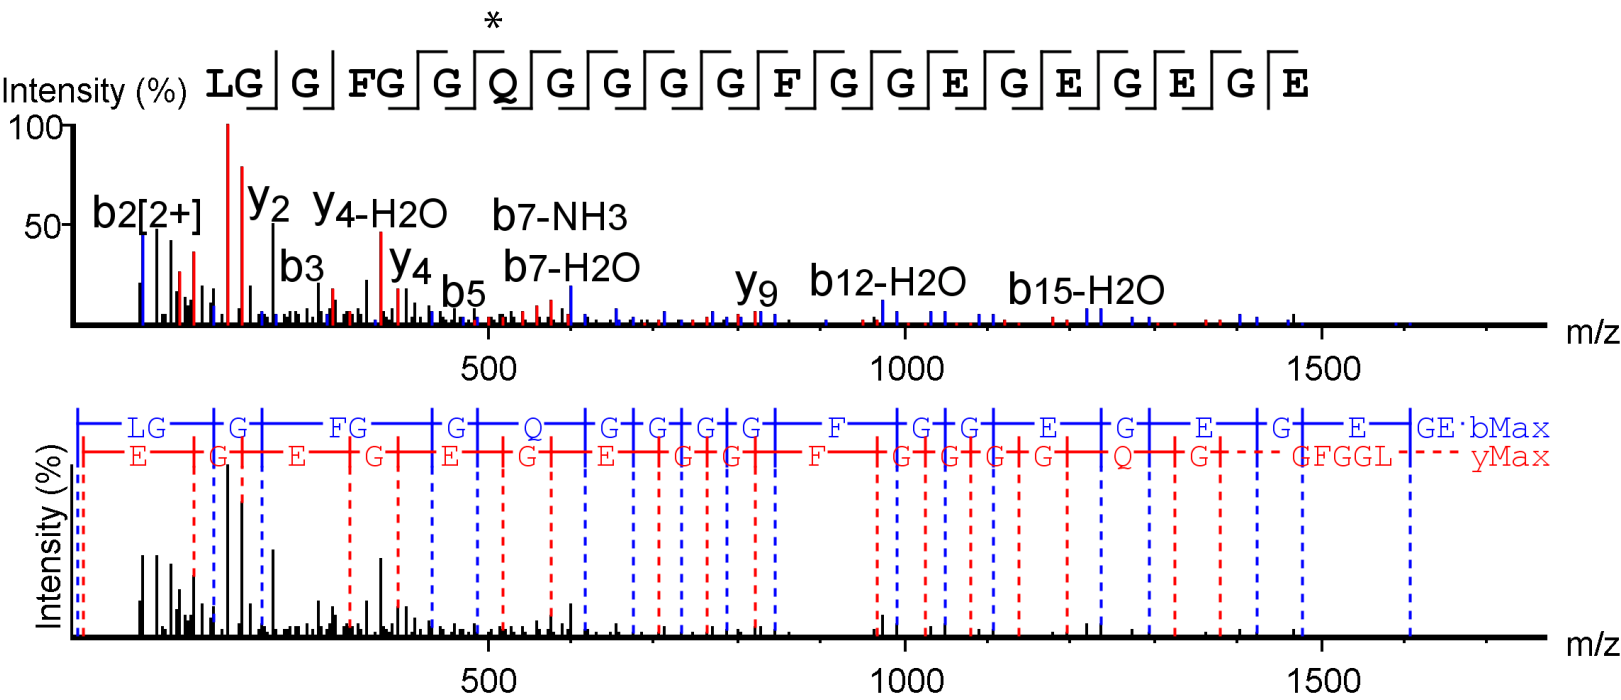

3.3 Position (AA): **289**; Mutation **V** → **L**

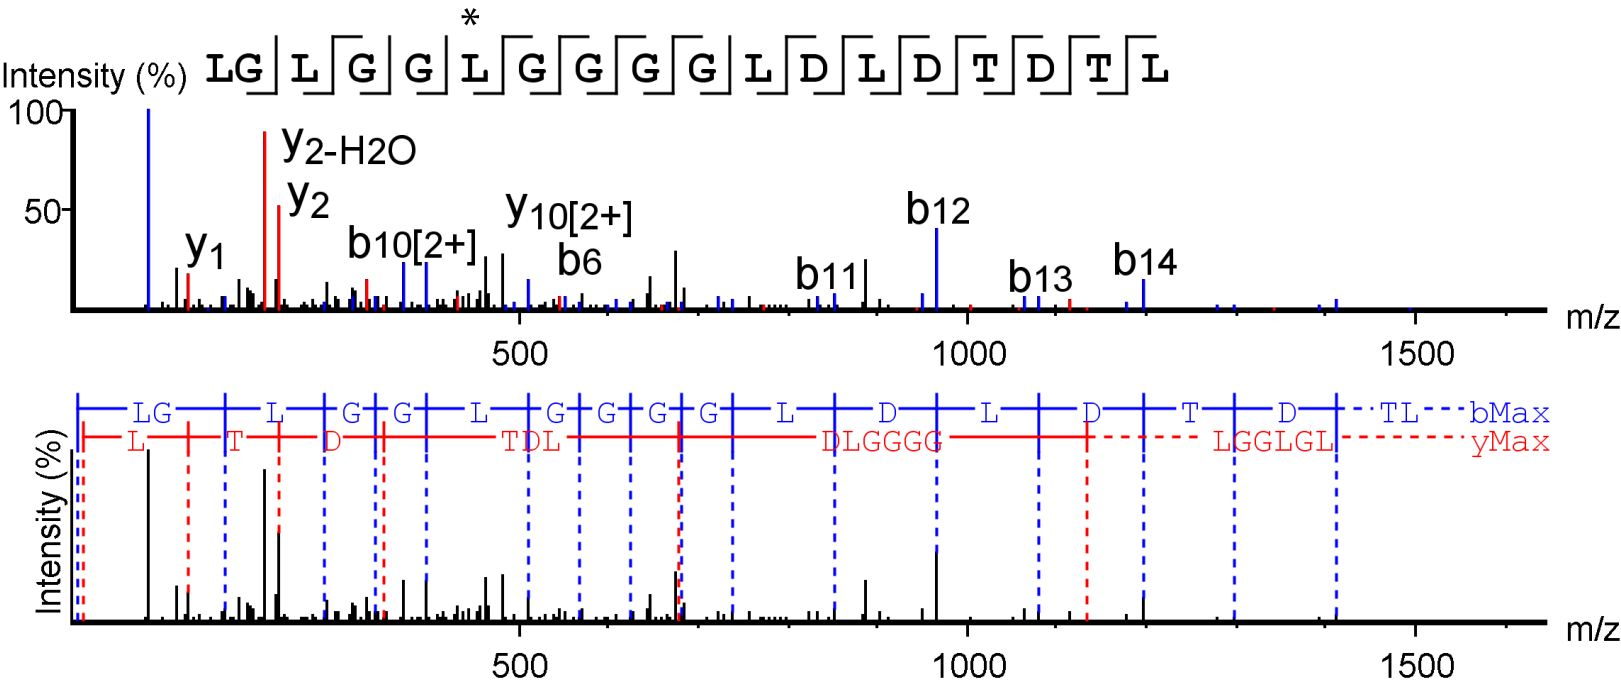

3.4 Position (AA): **289**; Mutation **V** → **L**

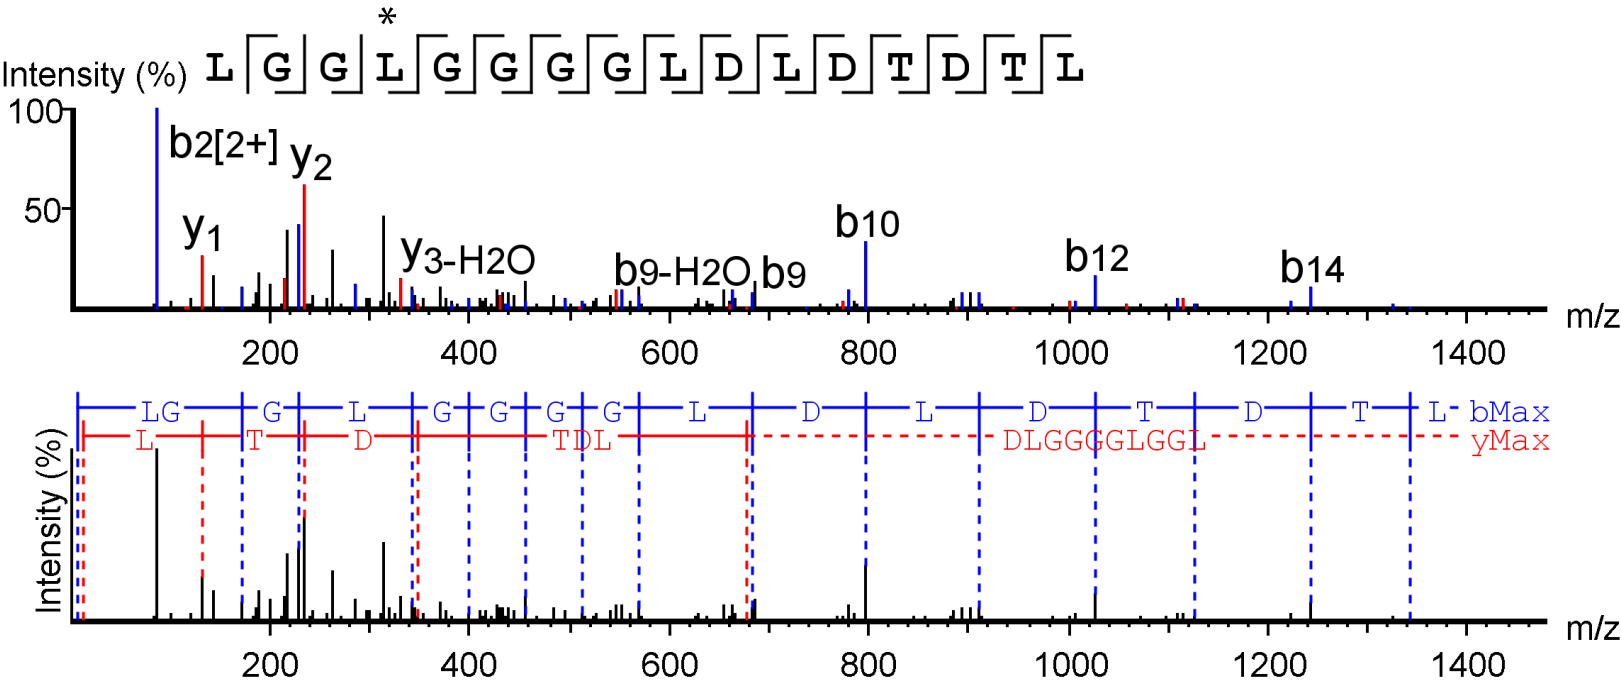

3.5 Position (AA): **310**; Mutation **I** → **F**

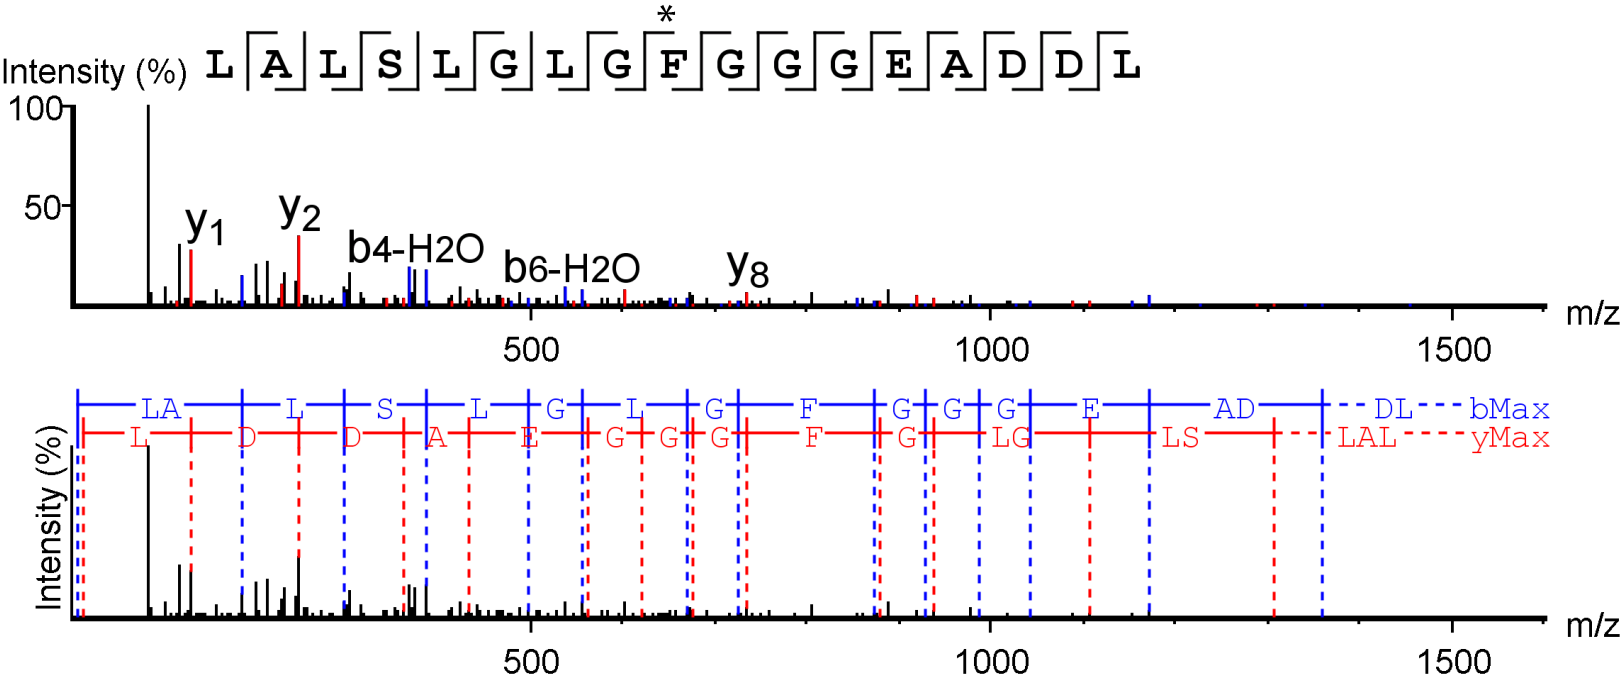

3.6 Position (AA): **310**; Mutation **I** → **F**

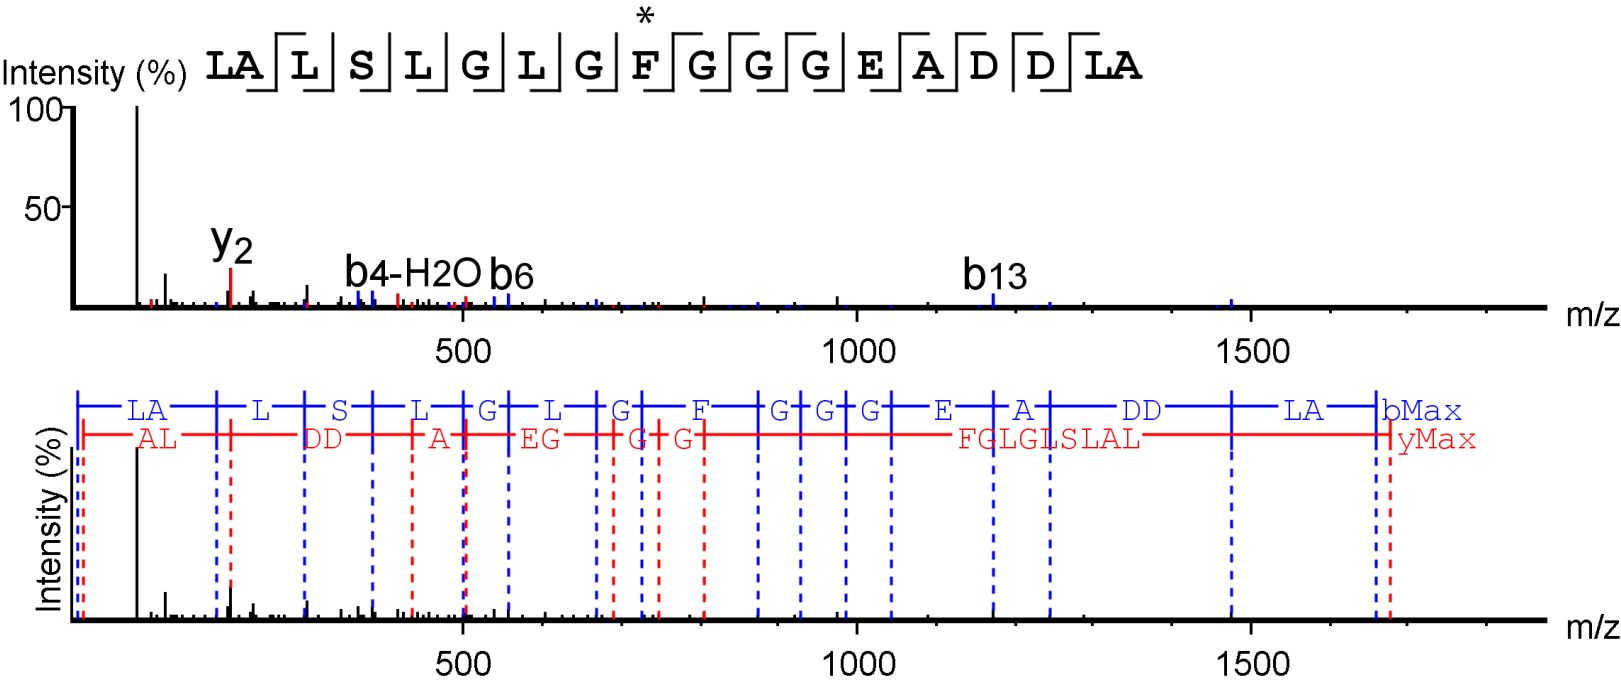

## 4. Hic74 [*Pseudunio auricularius*]

### 4.1 Position (AA): **163**; Mutation **S** → **D**

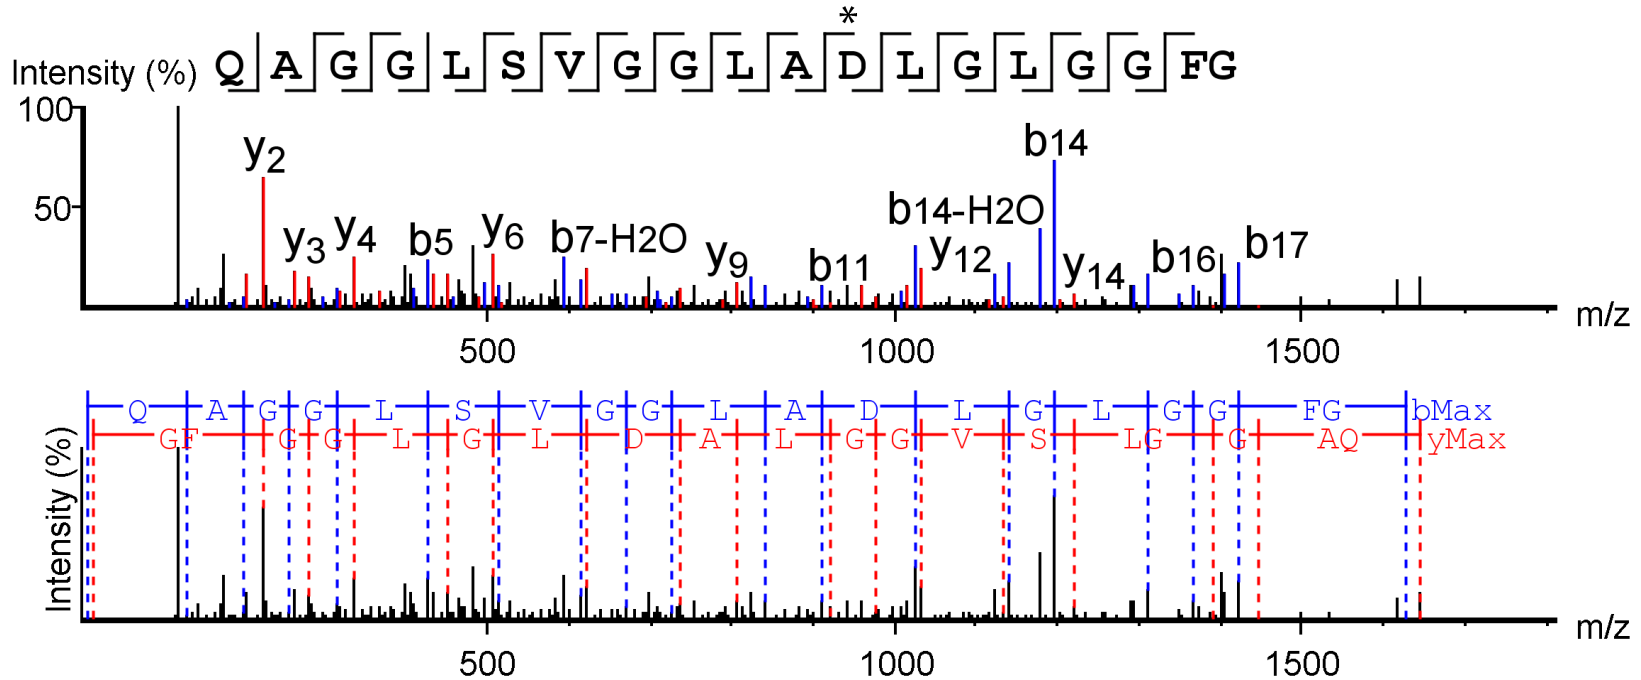

4.2 Position (AA): **163**; Mutation **S** → **D**  
**175**; Mutation **G** → **L**

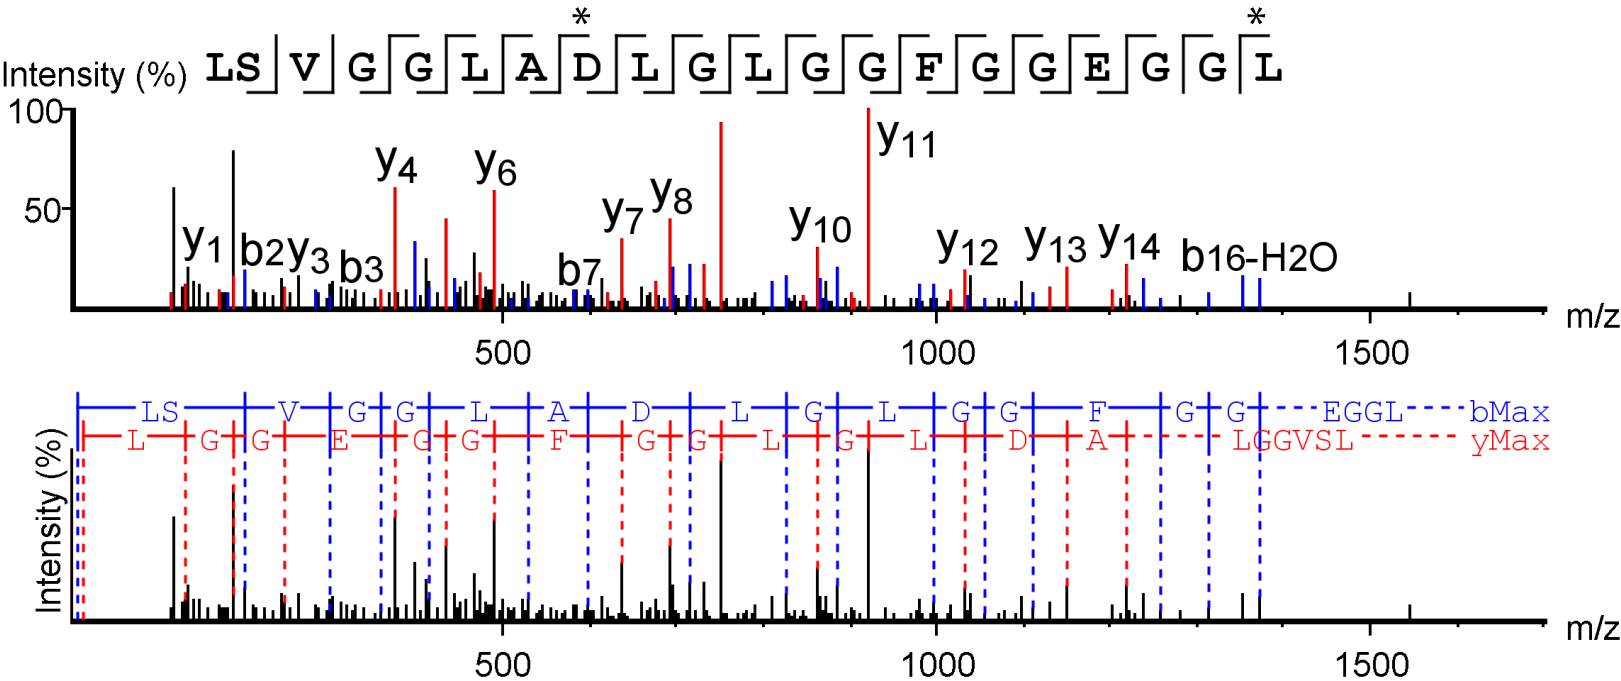

4.3 Position (AA): **163**; Mutation **S**  $\rightarrow$  **D**  
**175**; Mutation **G**  $\rightarrow$  **L**

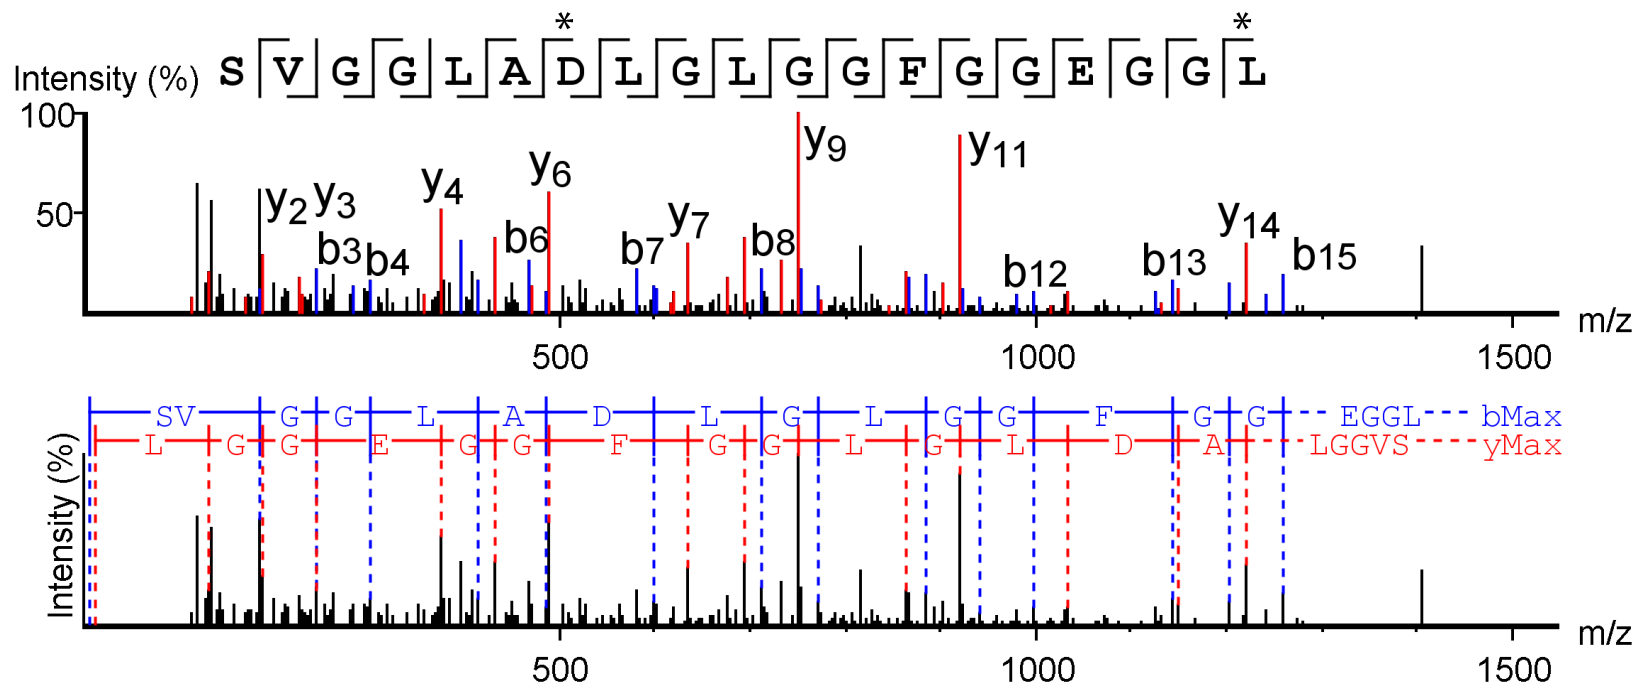

4.4 Position (AA): **284**; Mutation **L** → **F**  
**292**; Mutation **G** → **E**

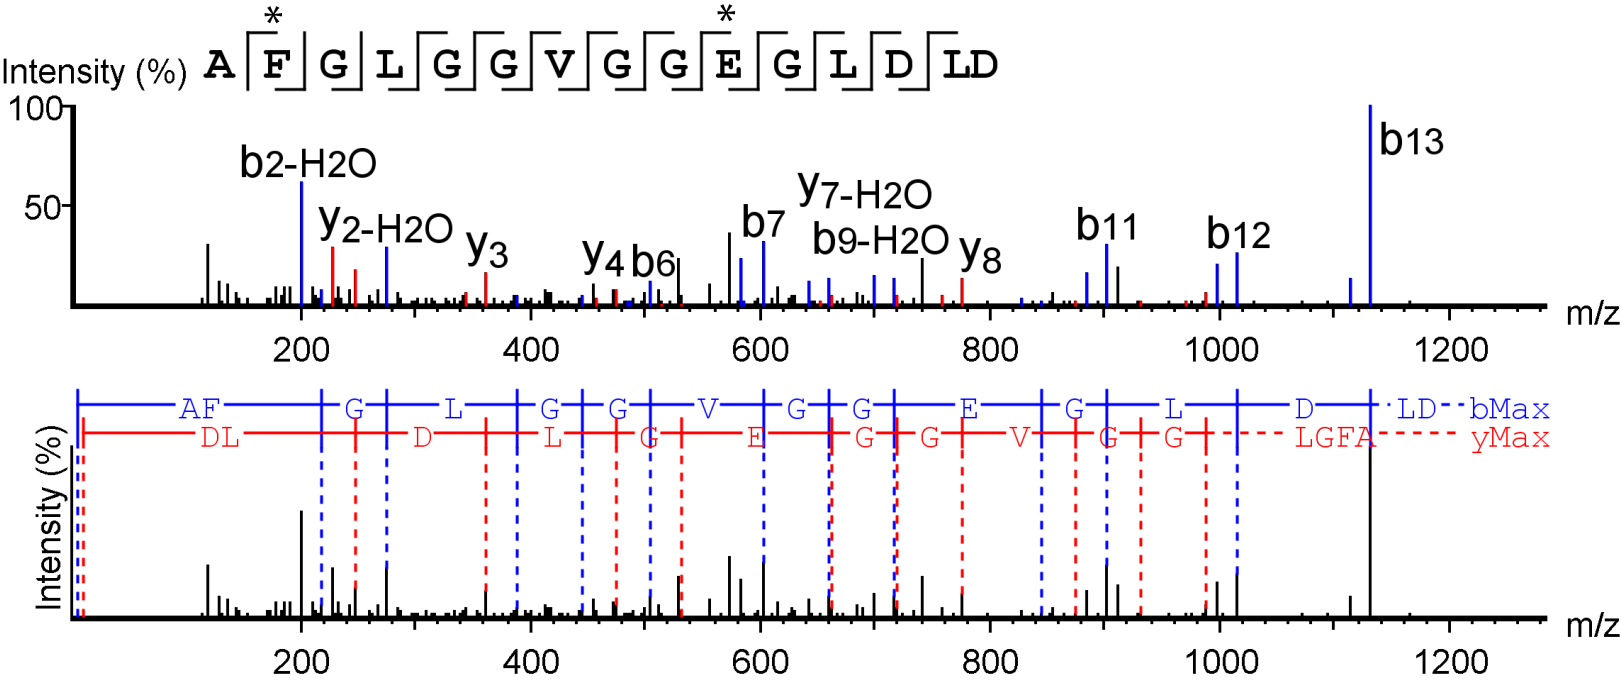

4.5 Position (AA): **284**; Mutation **L** → **F**  
**292**; Mutation **G** → **E**

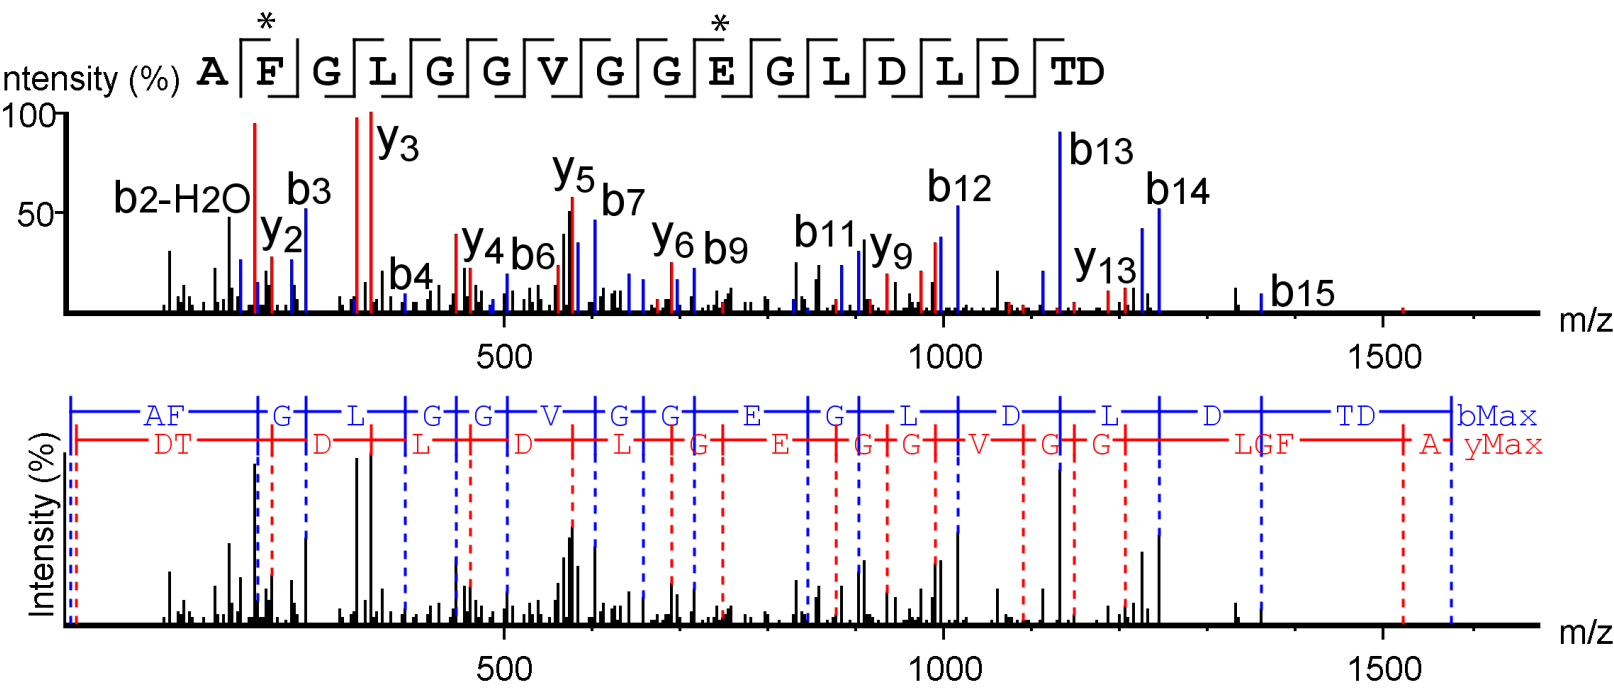

4.6 Position (AA): **306**; Mutation **L** → **F**

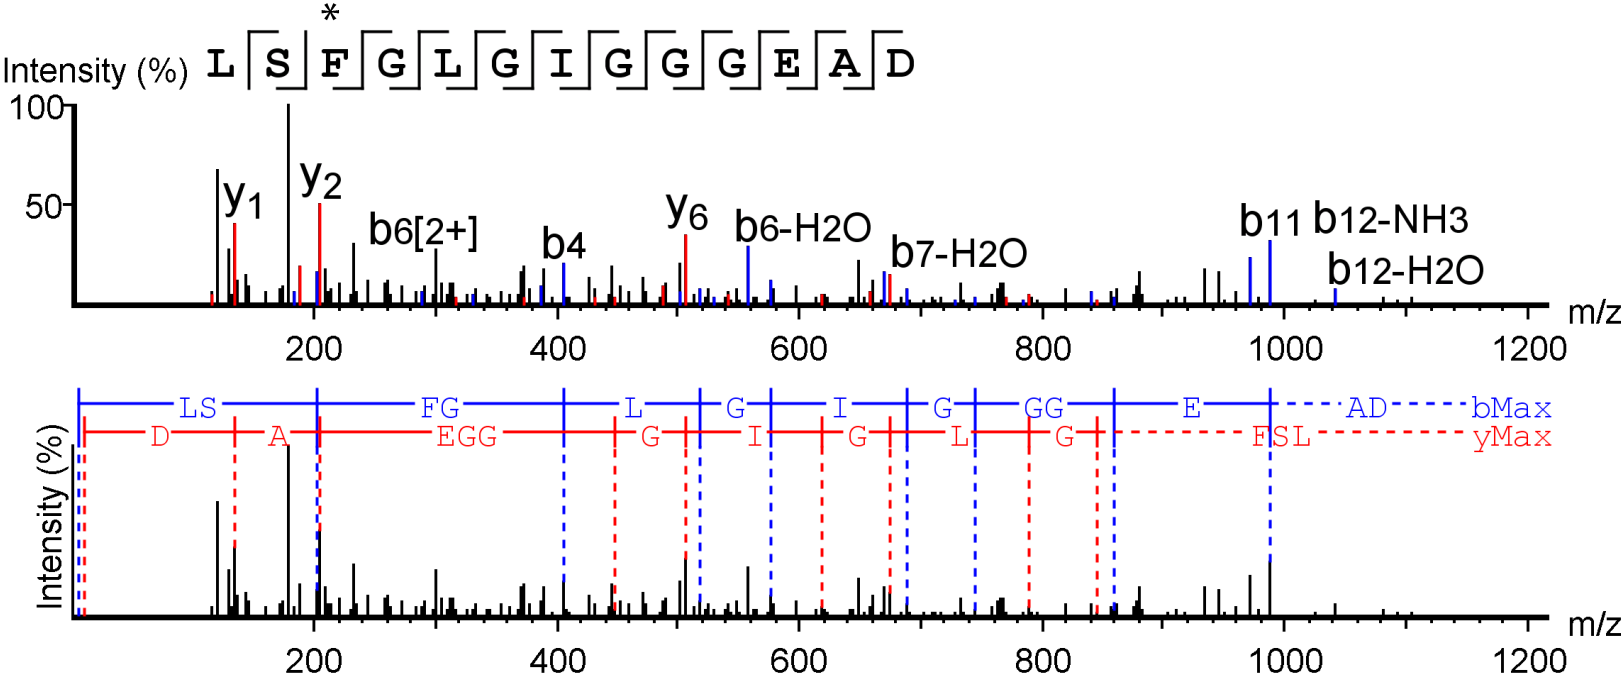

4.7 Position (AA): **306**; Mutation **L** → **F**

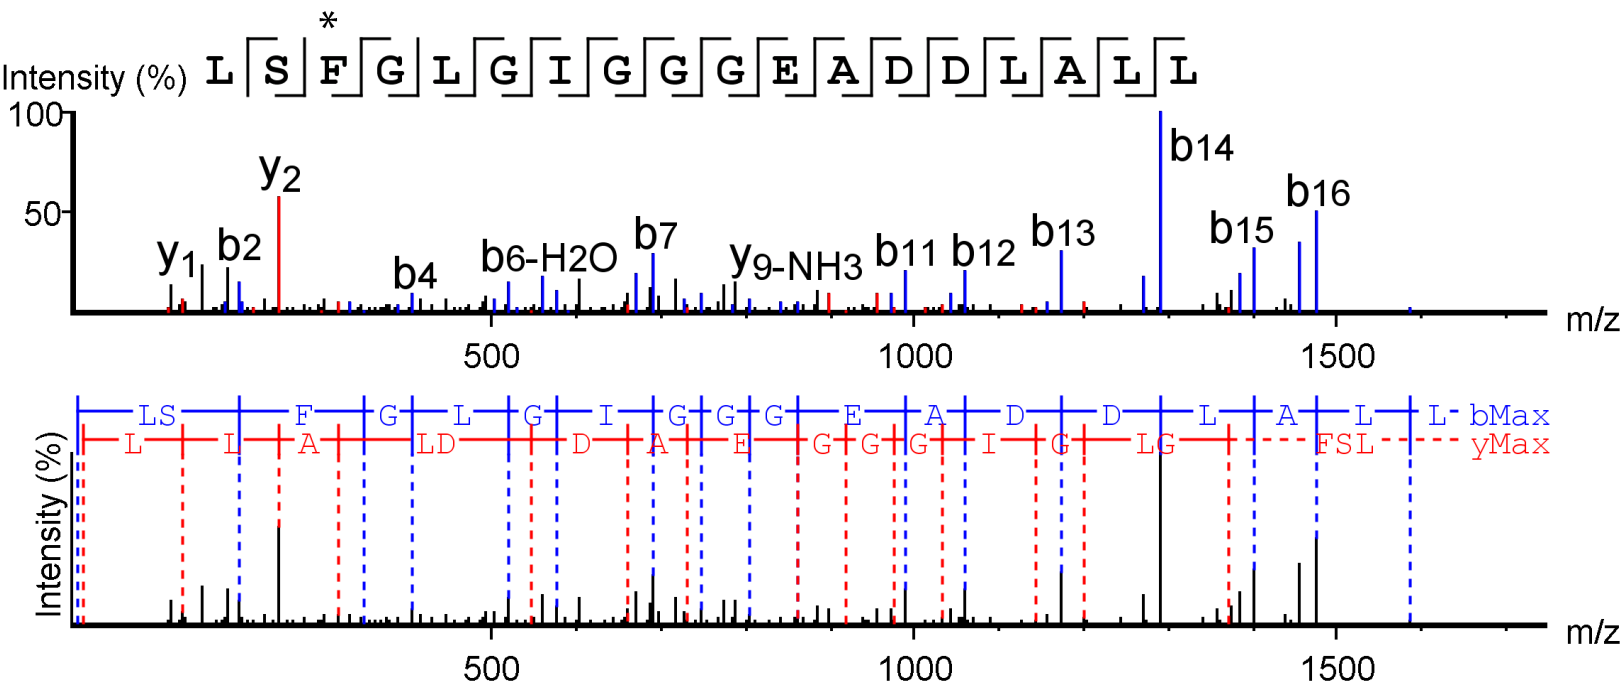

4.8 Position (AA): **821**; Mutation **Q** → **H**  
**822**; Mutation **R** → **H**  
**827**; Mutation **E** → **D**

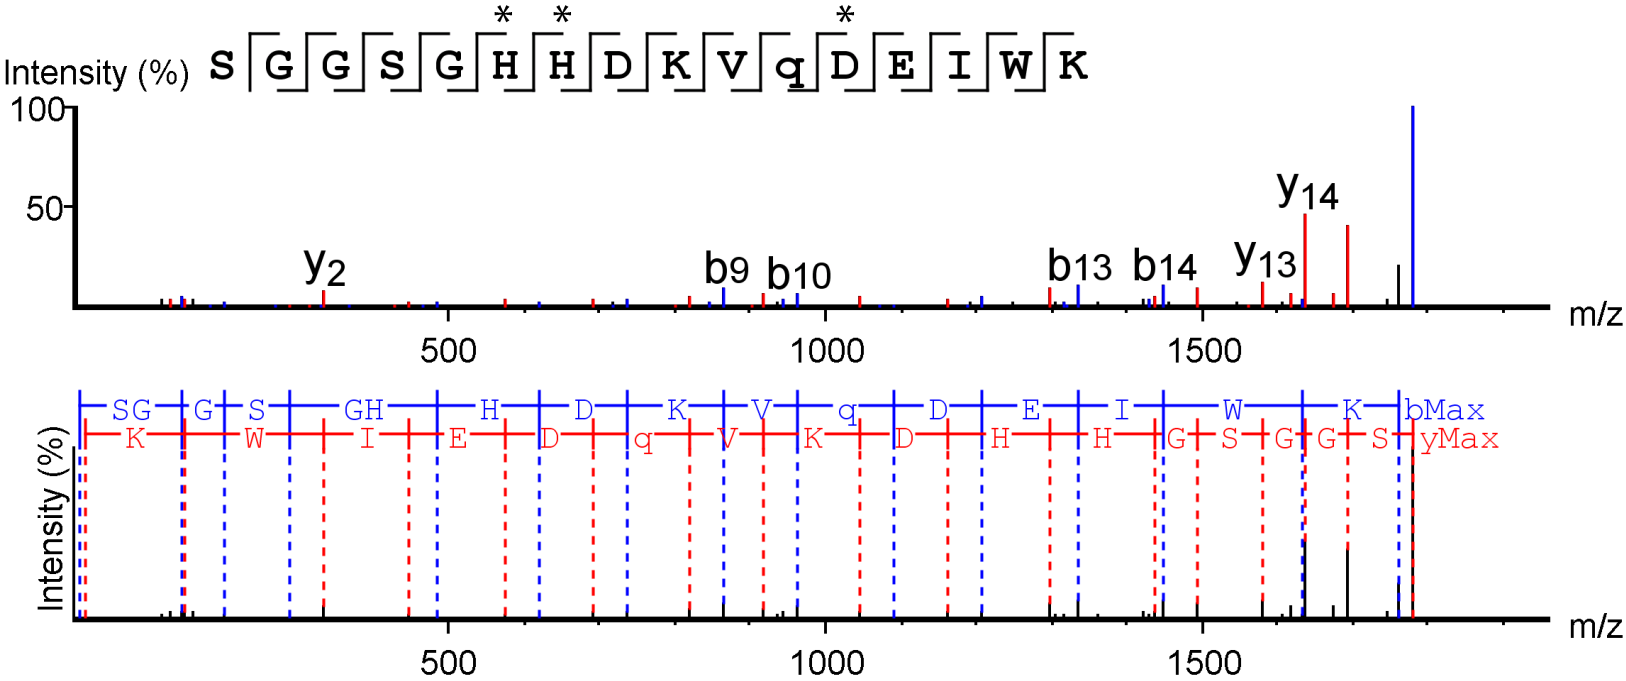

4.9 Position (AA): **821**; Mutation **Q** → **H**  
**822**; Mutation **R** → **H**  
**827**; Mutation **E** → **D**

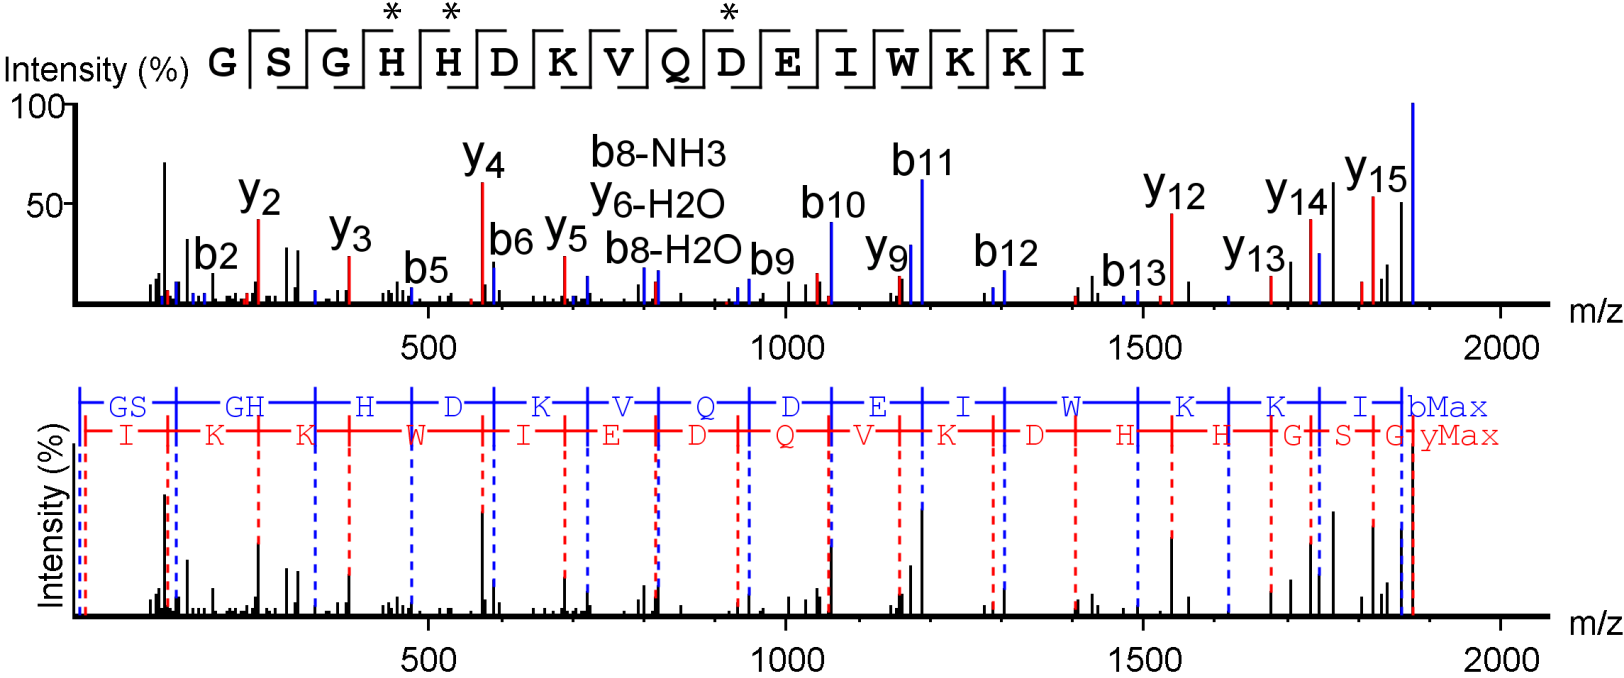

## 5. Hic74 [HavA]

### 5.1 Position (AA): **85**; Mutation **A** → **S**

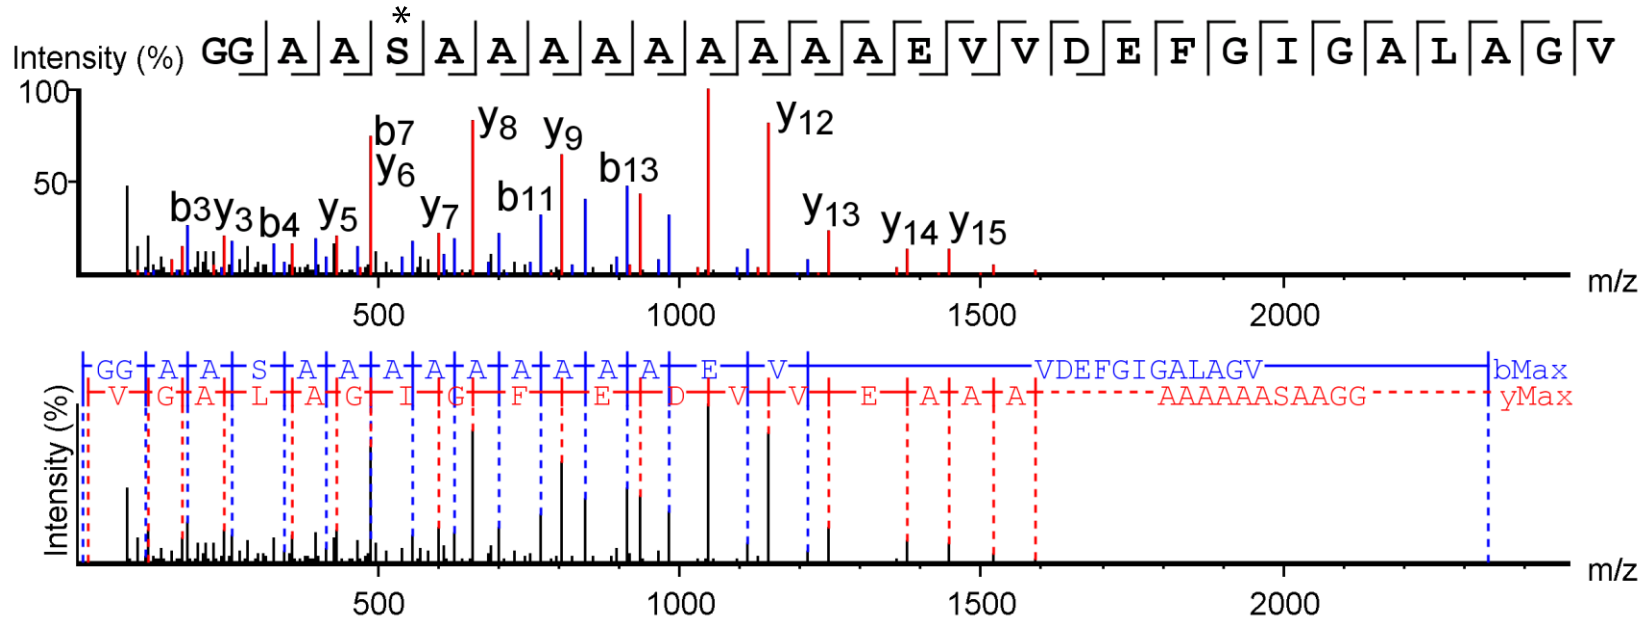

5.2 Position (AA): **85**; Mutation **A** → **S**

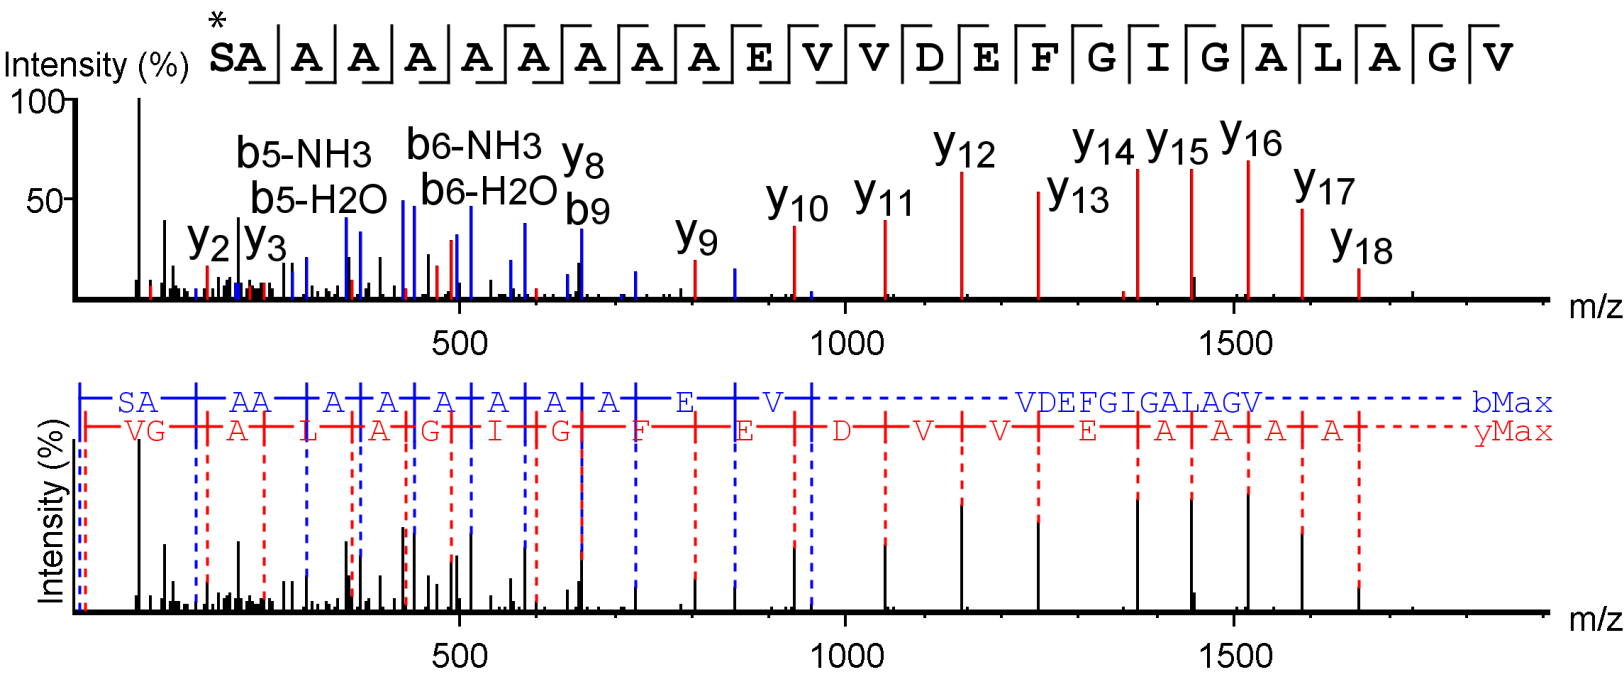

5.3 Position (AA): **111**; Mutation **G** → **A**

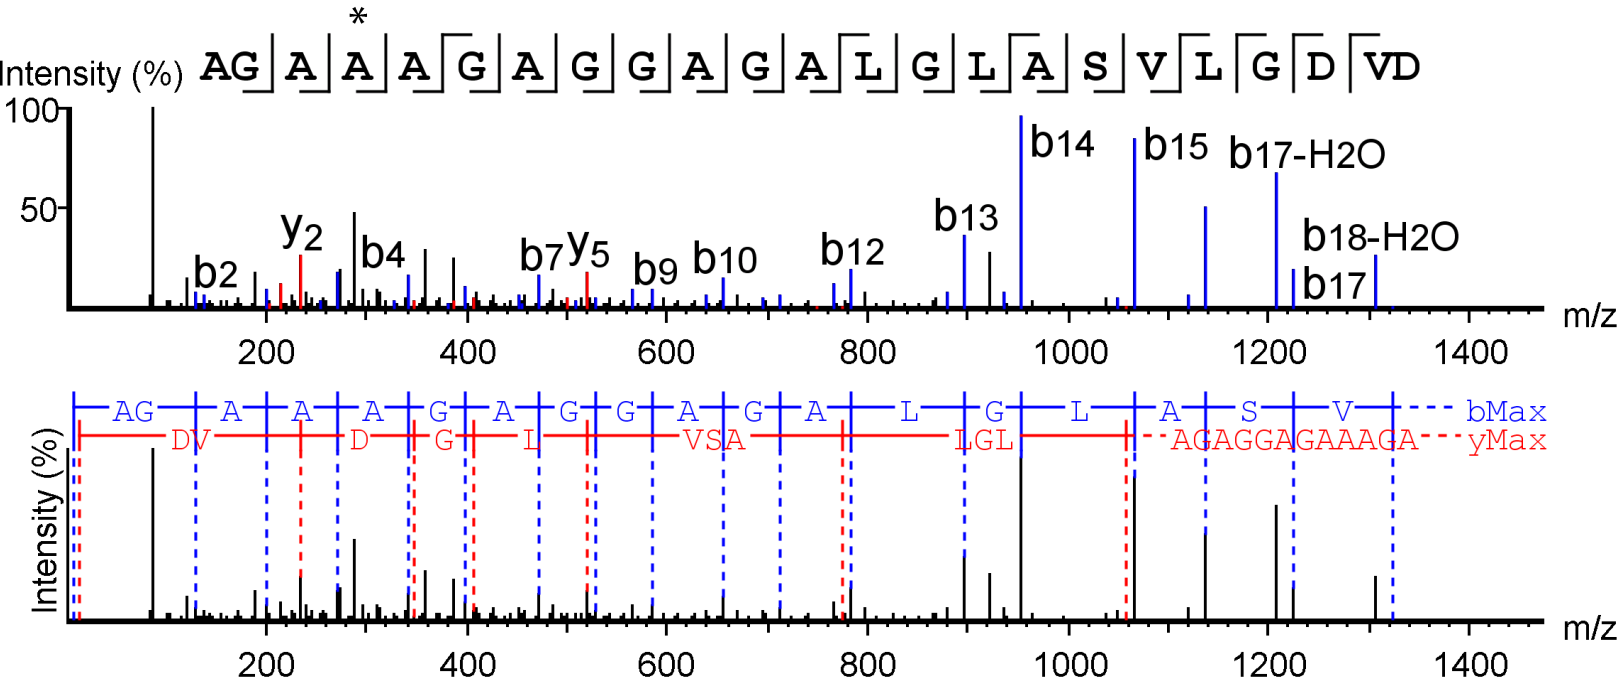

# 5.4 Position (AA): **111**; Mutation **G** → **A**

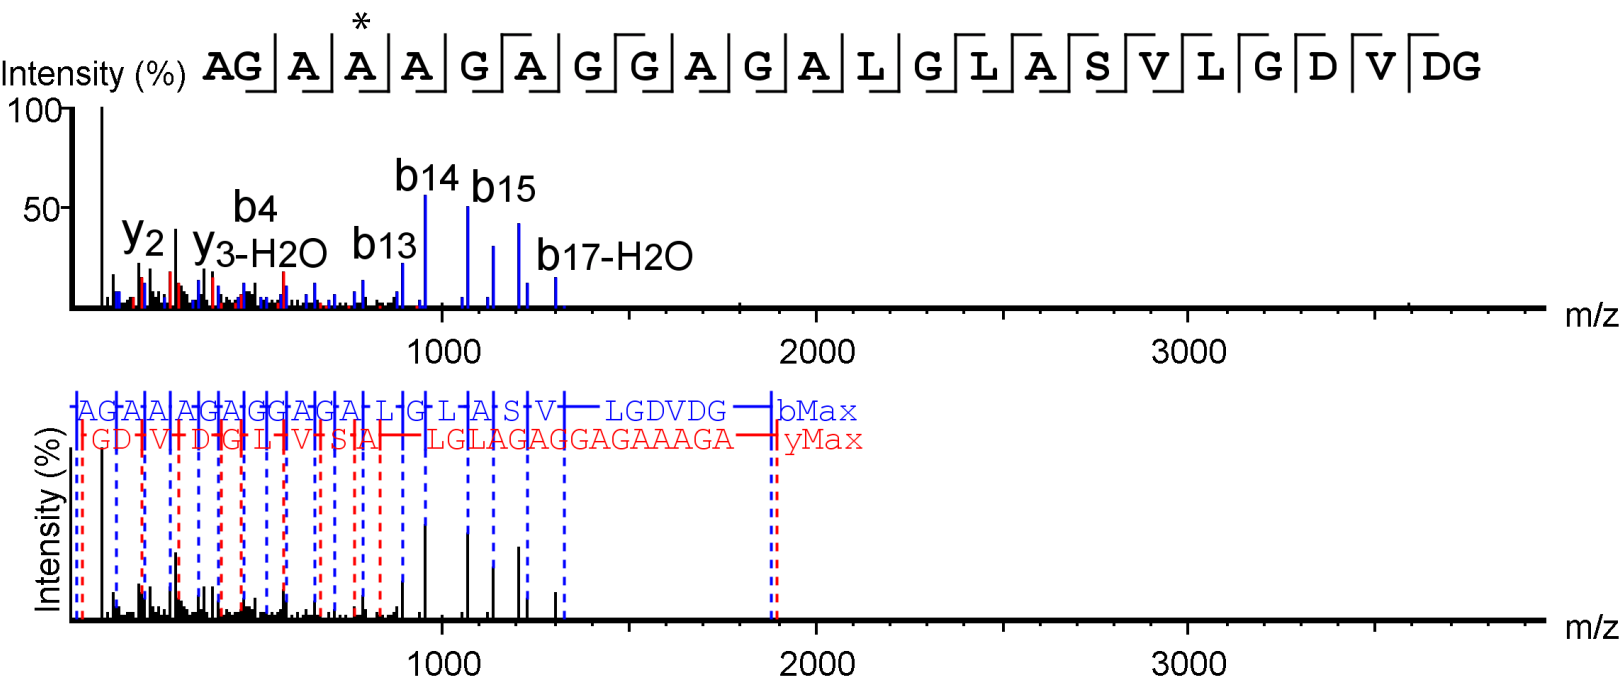

5.5 Position (AA): **172**; Mutation **E** → **Q**

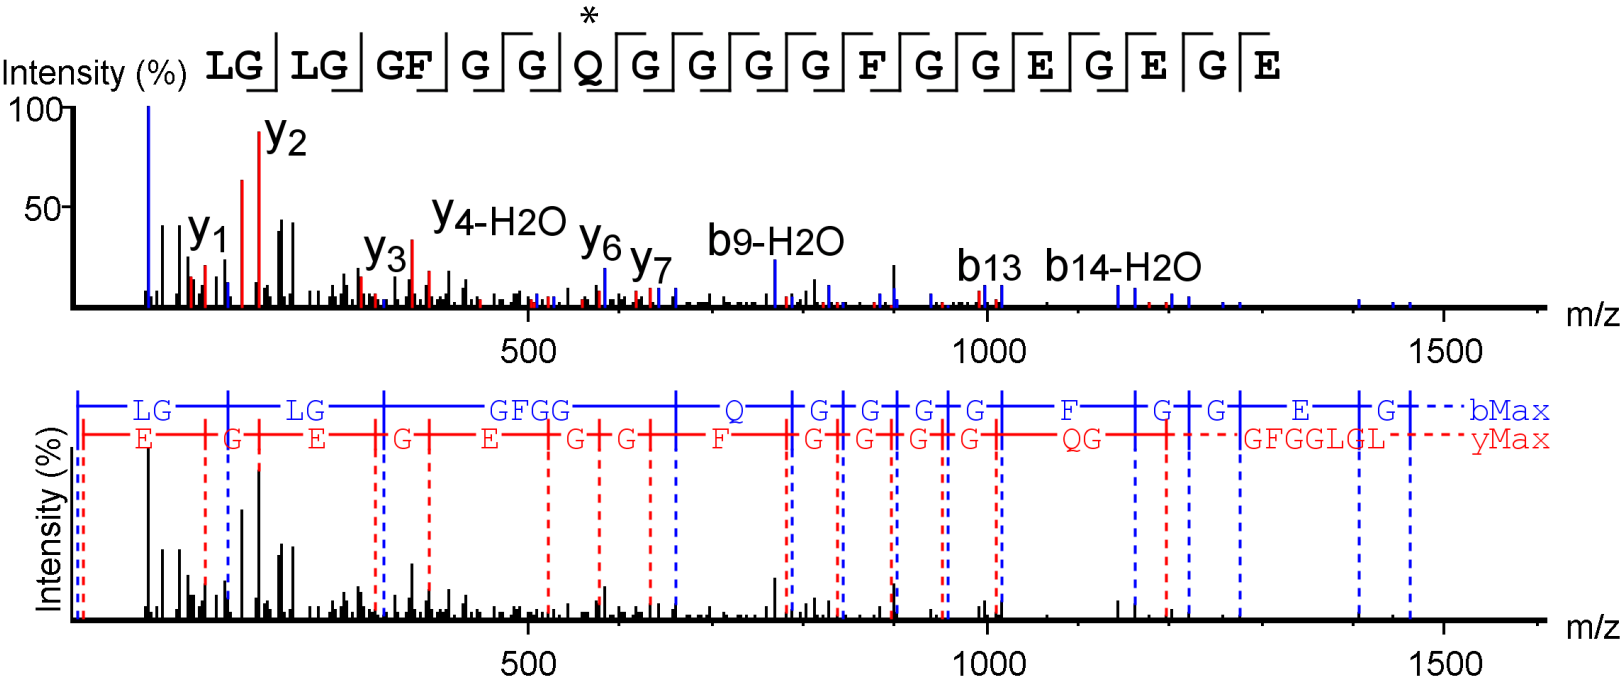

5.6 Position (AA): **289**; Mutation **V → L**

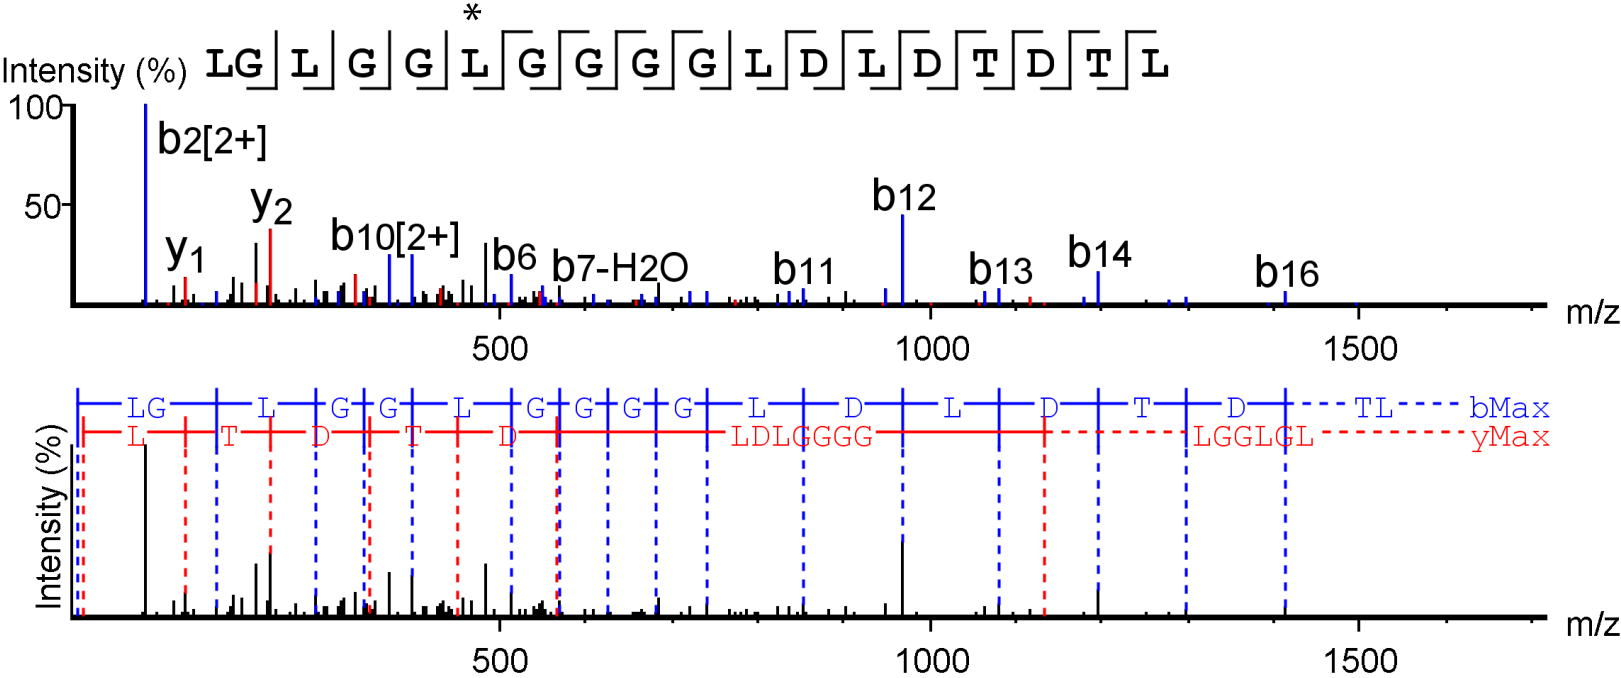

5.7 Position (AA): **289**; Mutation **V** → **L**

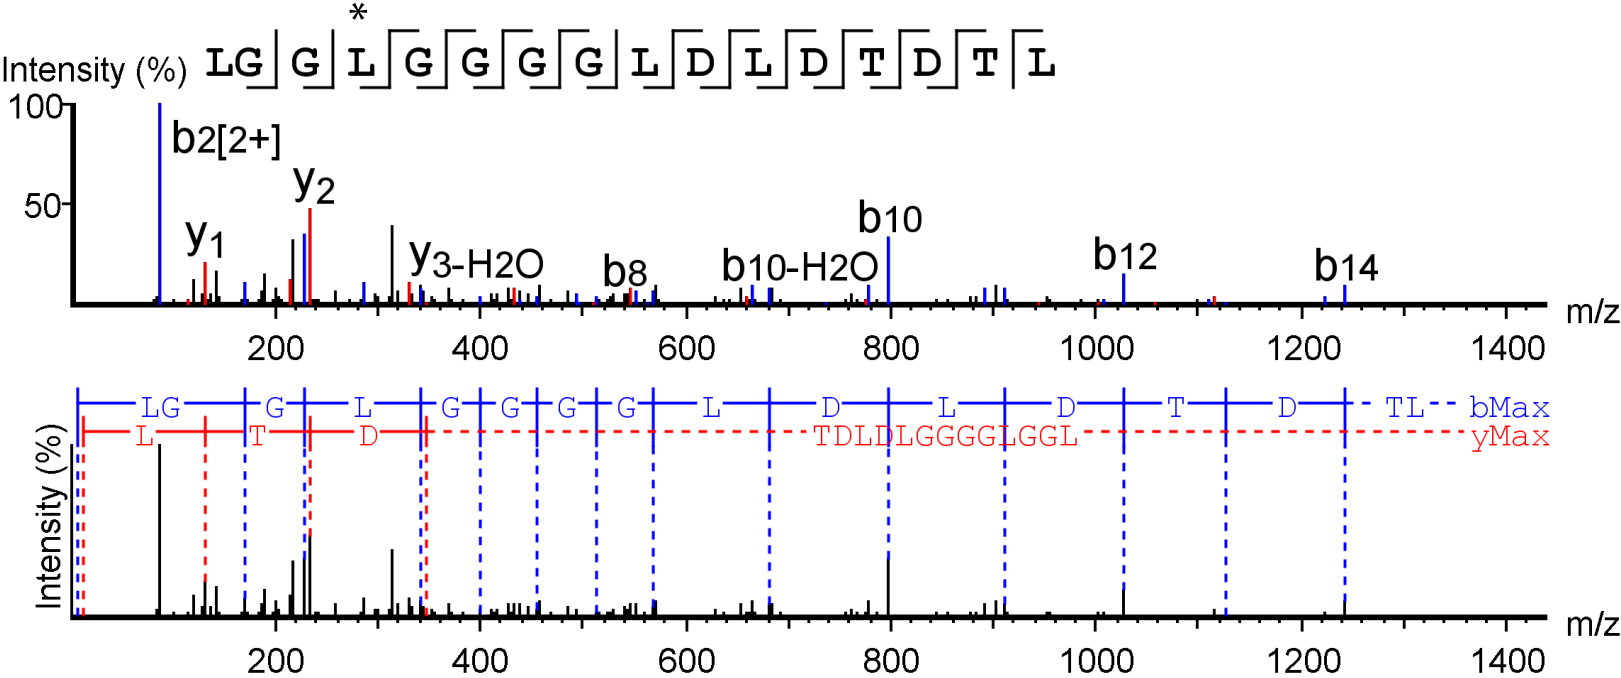

5.8 Position (AA): **310**; Mutation **I** → **F**

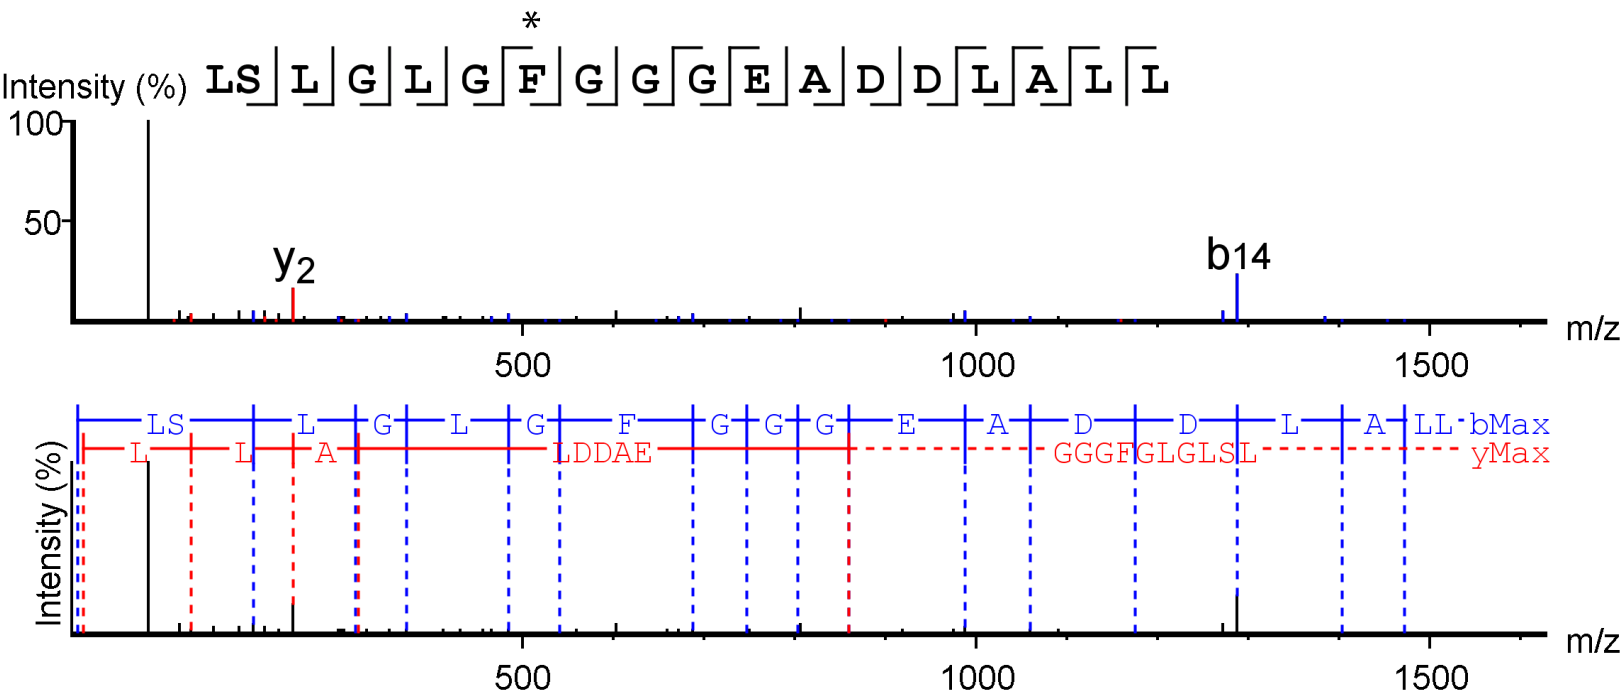

5.9 Position (AA): **822**; Mutation **R** → **G**

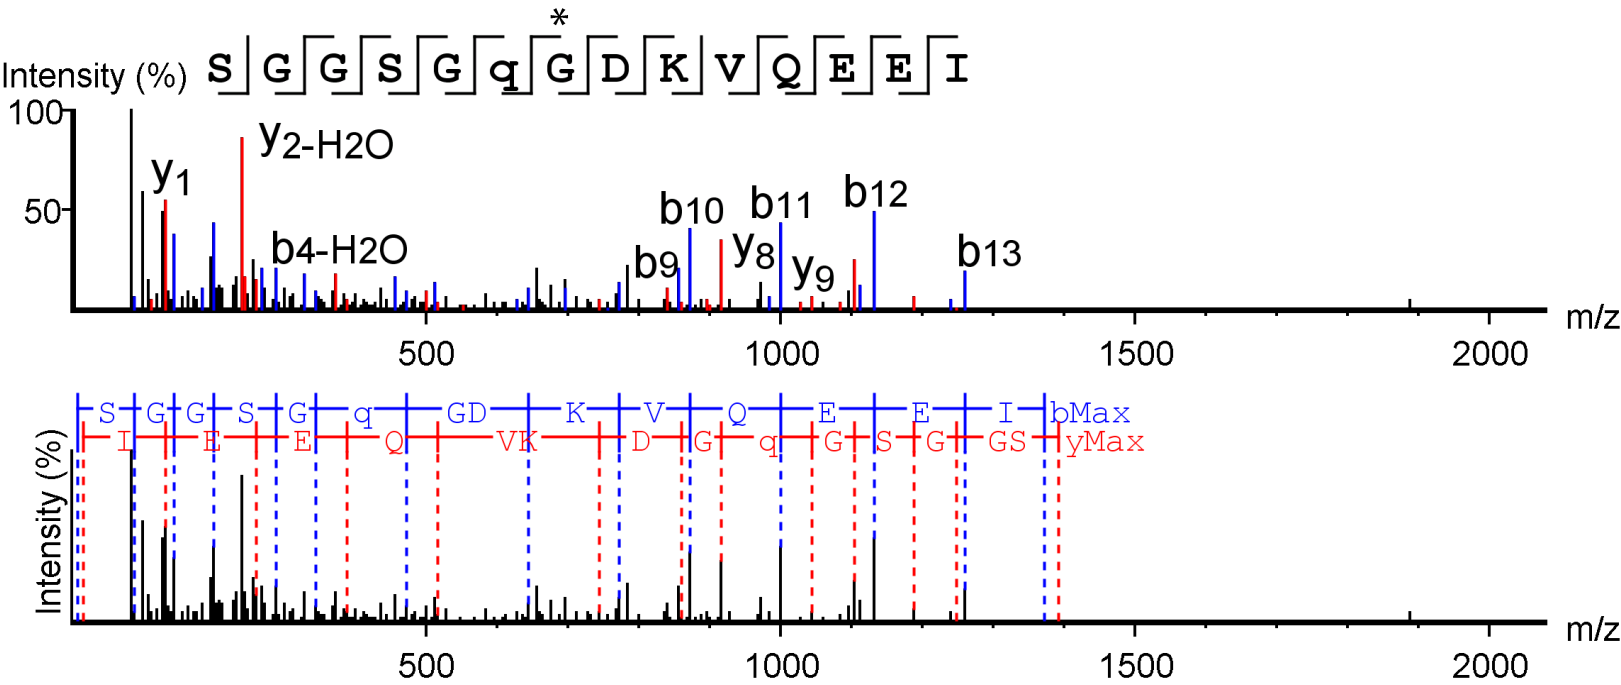

5.10 Position (AA): **822**; Mutation **R** → **G**

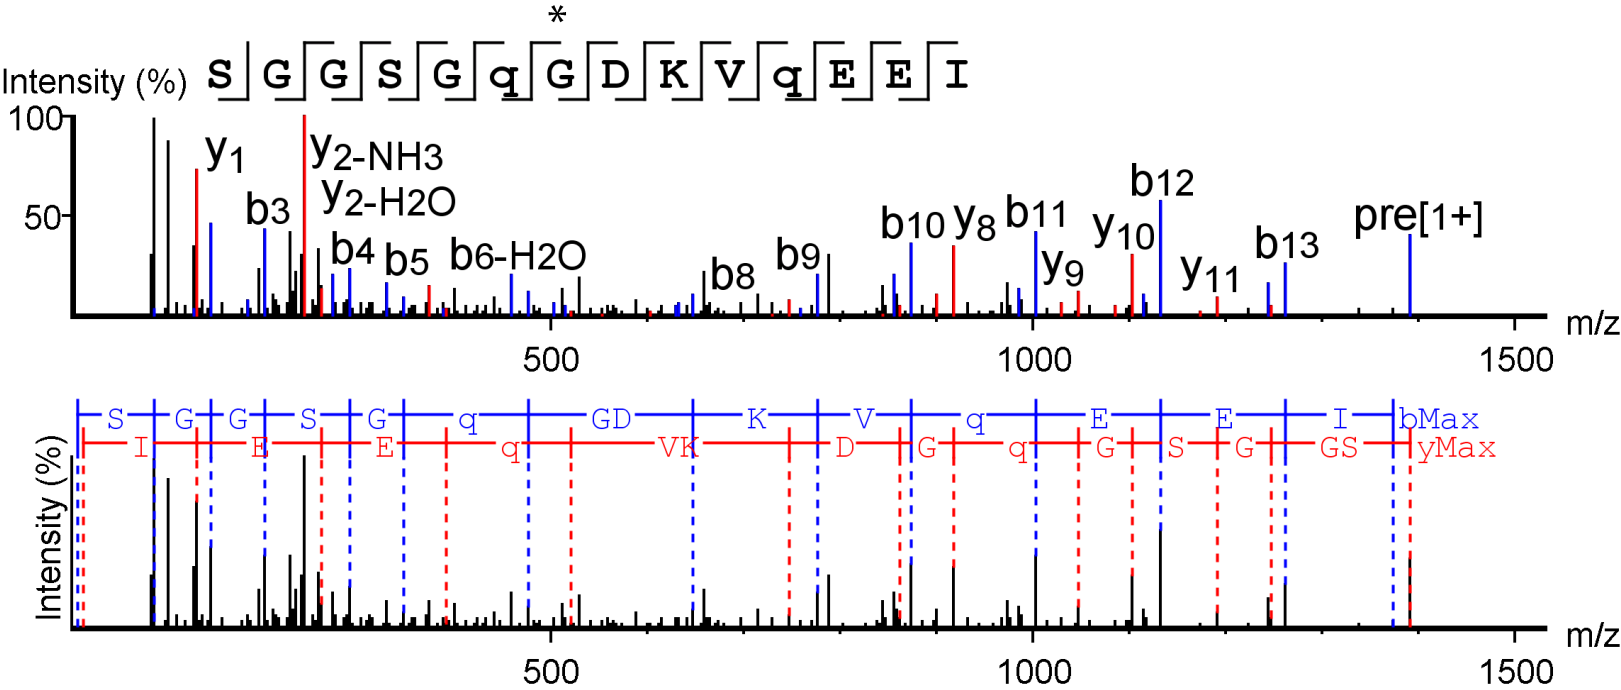

## 6. Hic74 [HavB]

6.1 Position (AA): **85**; Mutation **A** → **S**  
**108**; Mutation **A** → **V**

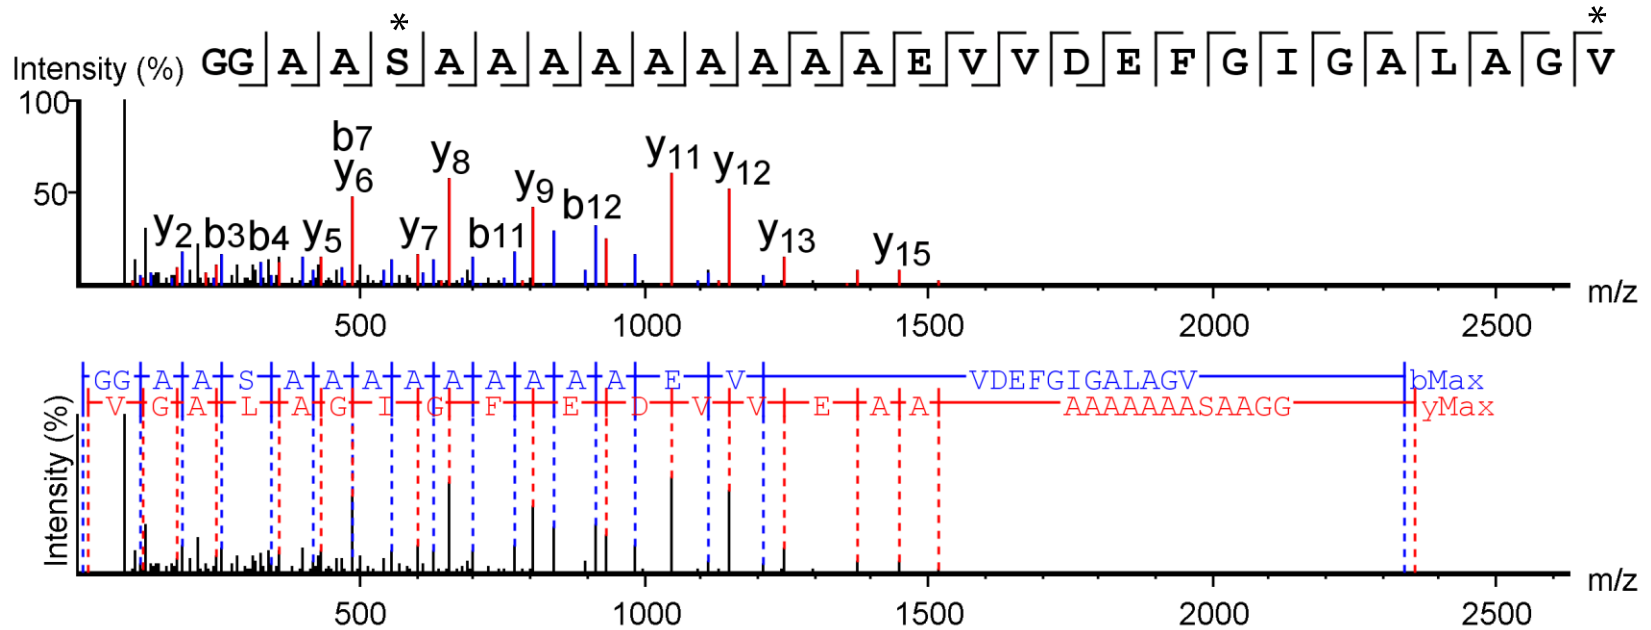

6.2 Position (AA): **289**; Mutation **V** → **L**

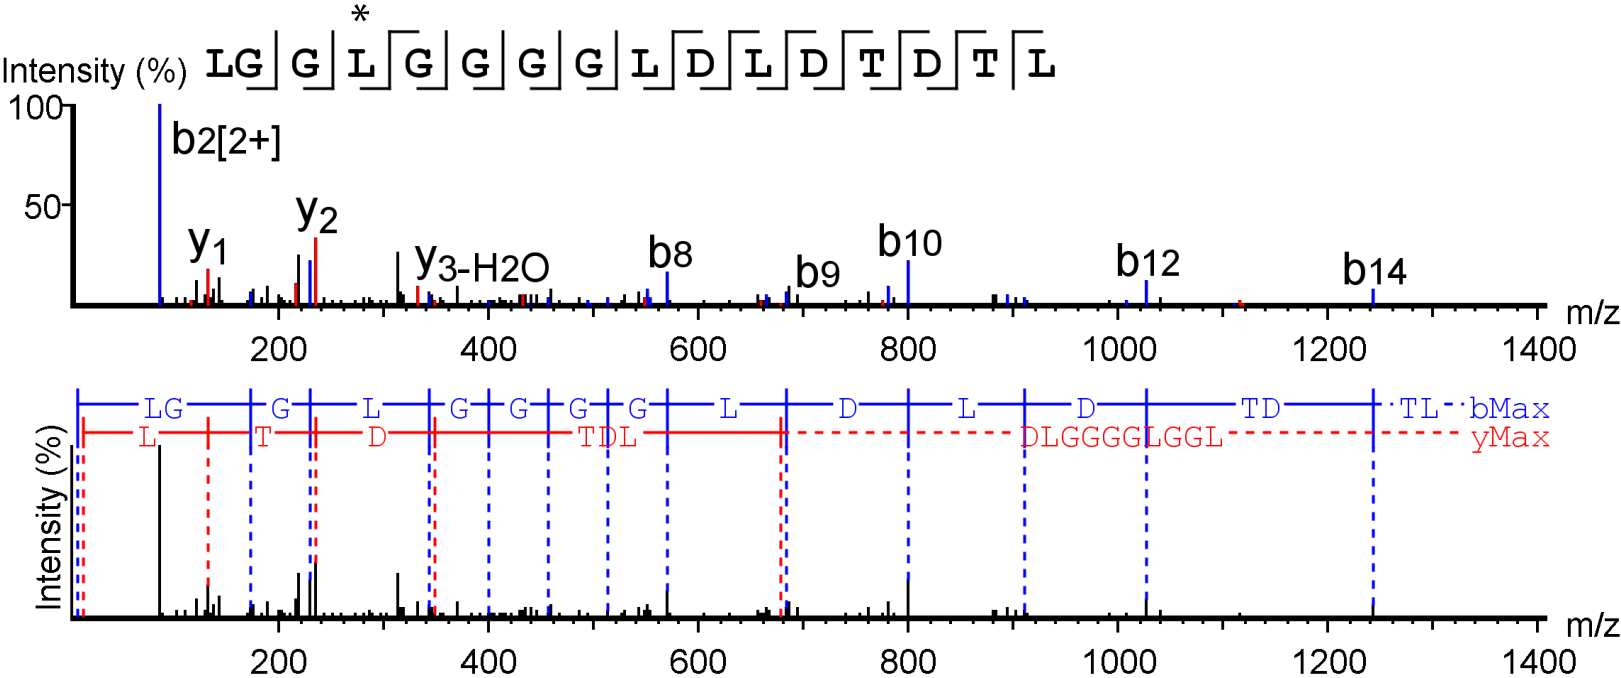

6.3 Position (AA): **310**; Mutation **I** → **F**

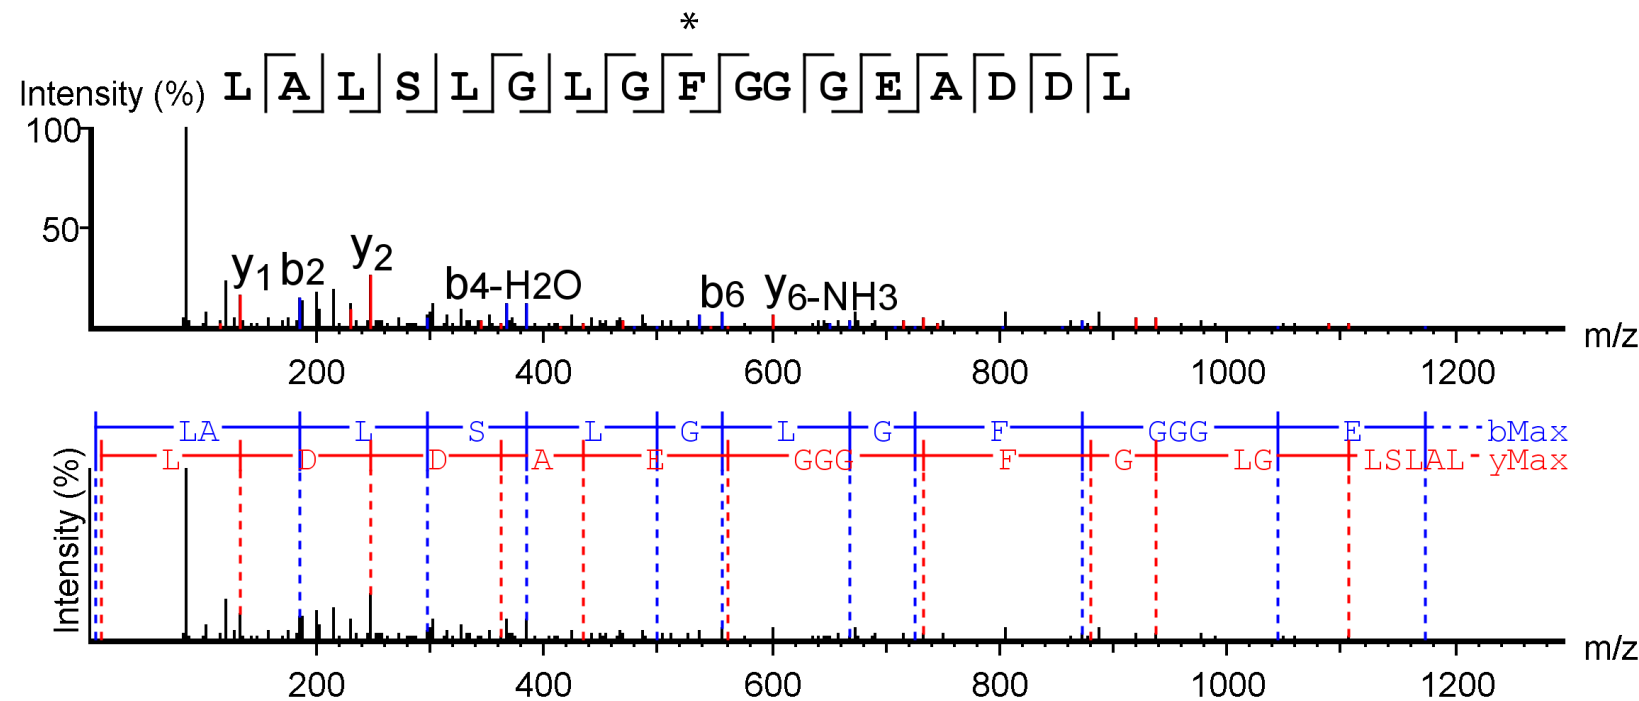

6.4 Position (AA): **822**; Mutation **R** → **G**

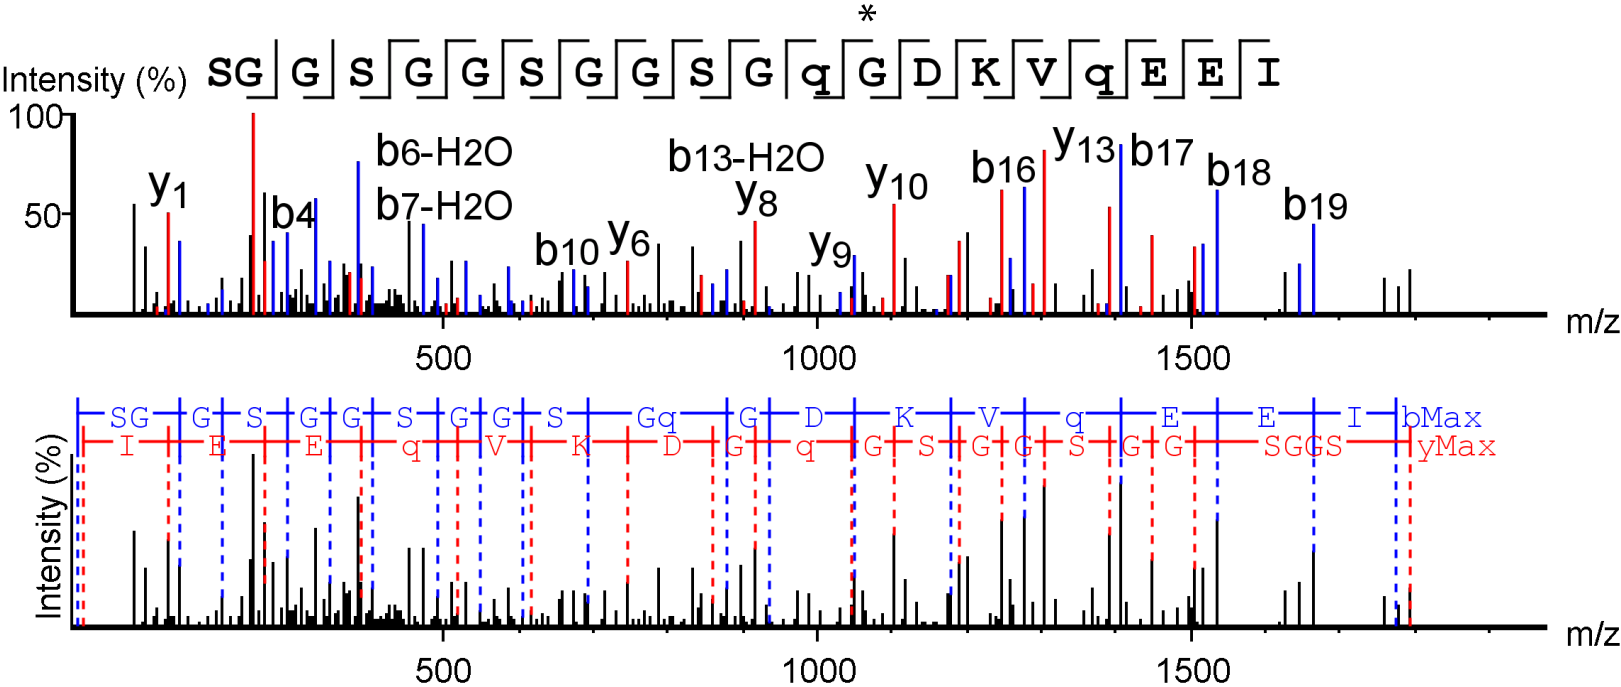

6.5 Position (AA): **822**; Mutation **R** → **G**

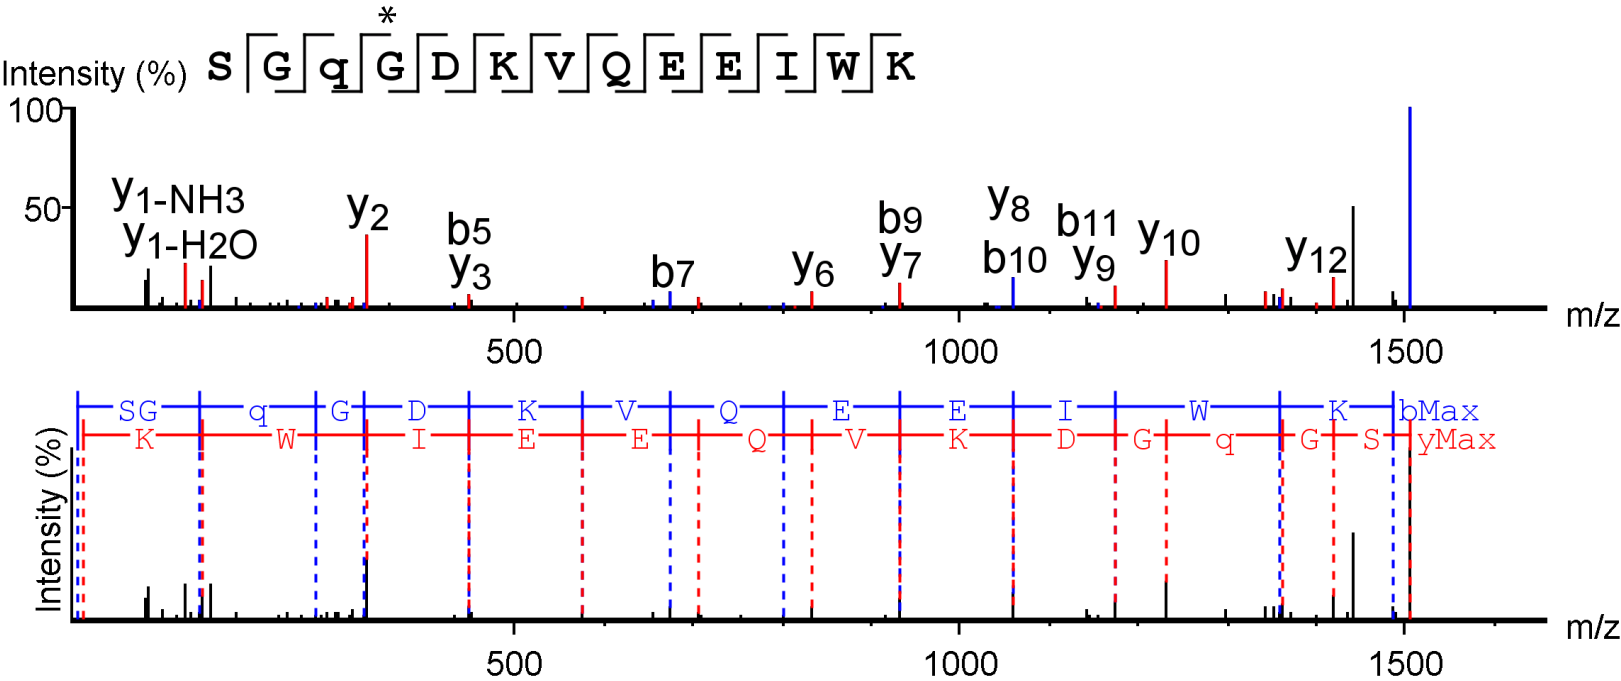

## 7. Hic74 [HavC]

7.1 Position (AA): **85**; Mutation **A** → **S**  
**108**; Mutation **A** → **V**

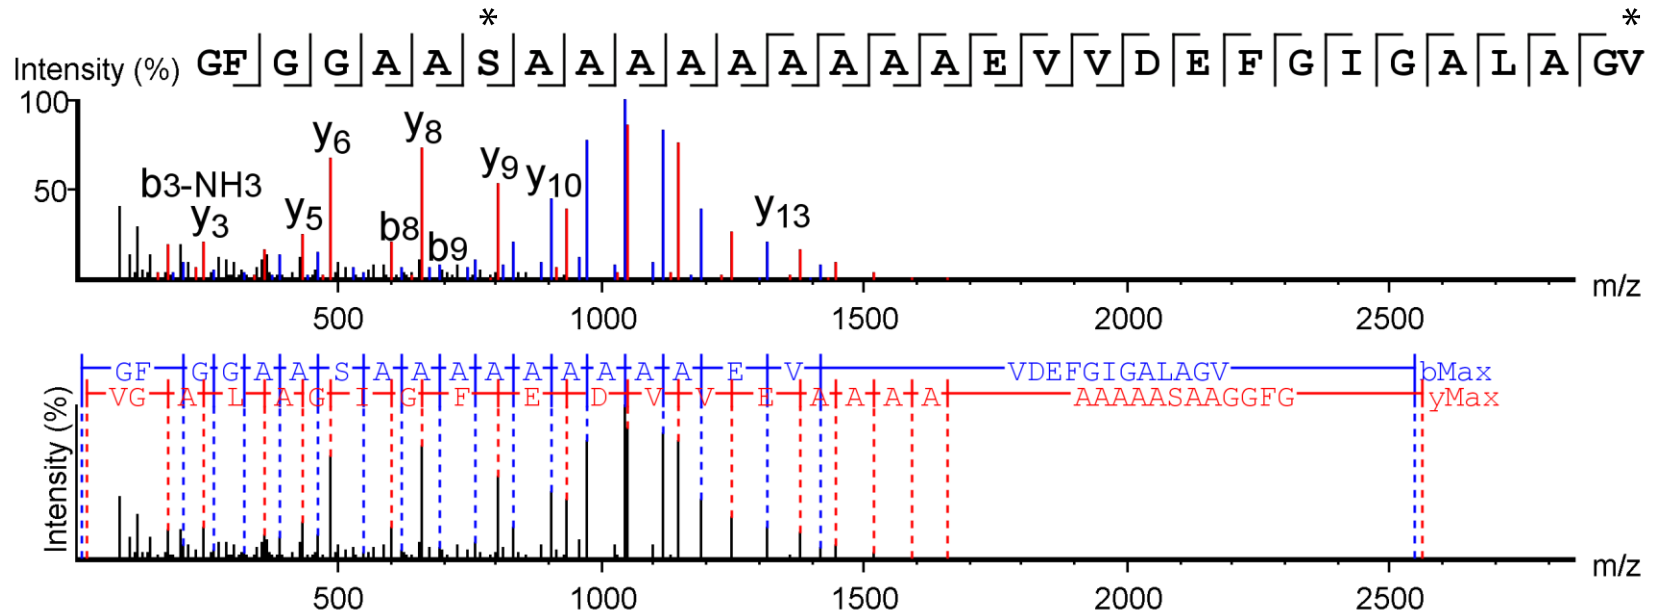

7.2 Position (AA): **85**; Mutation **A** → **S**  
**108**; Mutation **A** → **V**

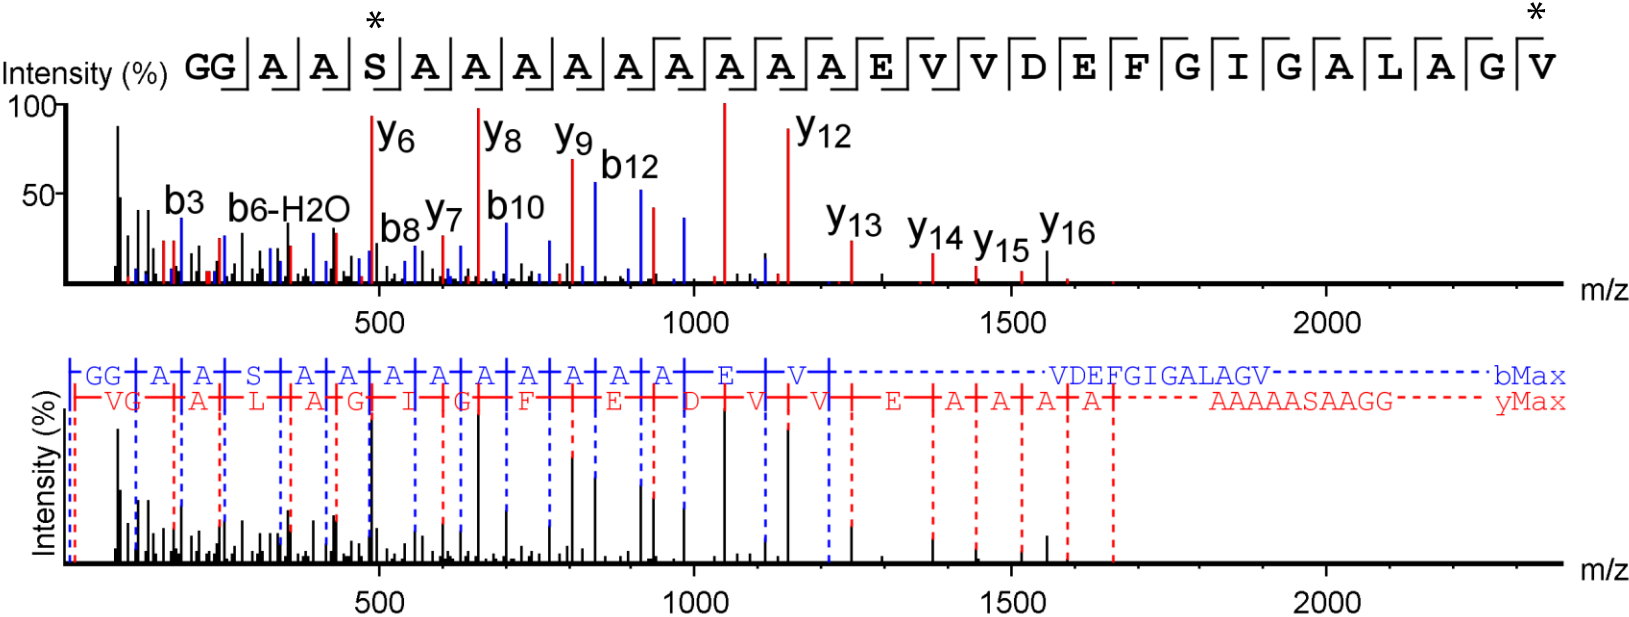

7.3 Position (AA): **111**; Mutation **G** → **A**

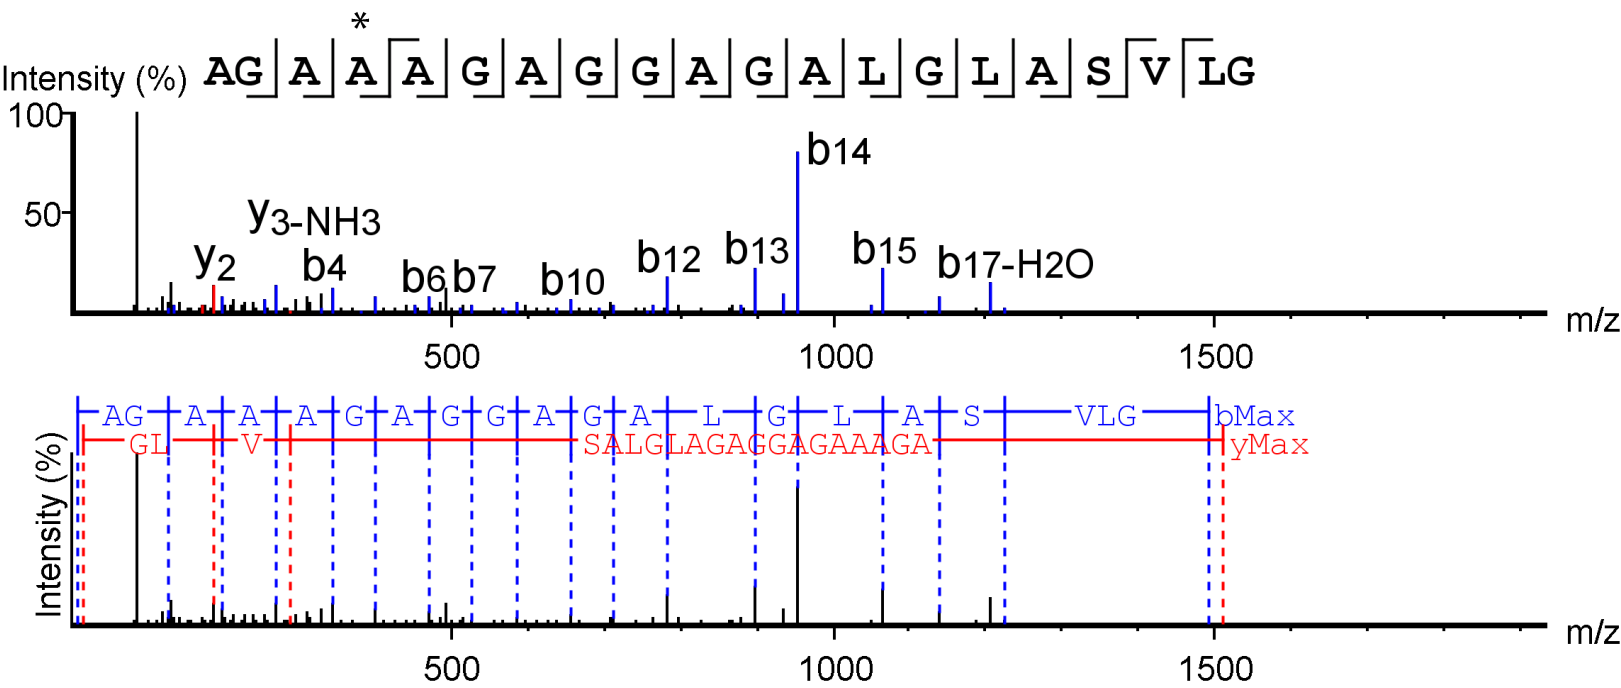

7.4 Position (AA): **111**; Mutation **G** → **A**

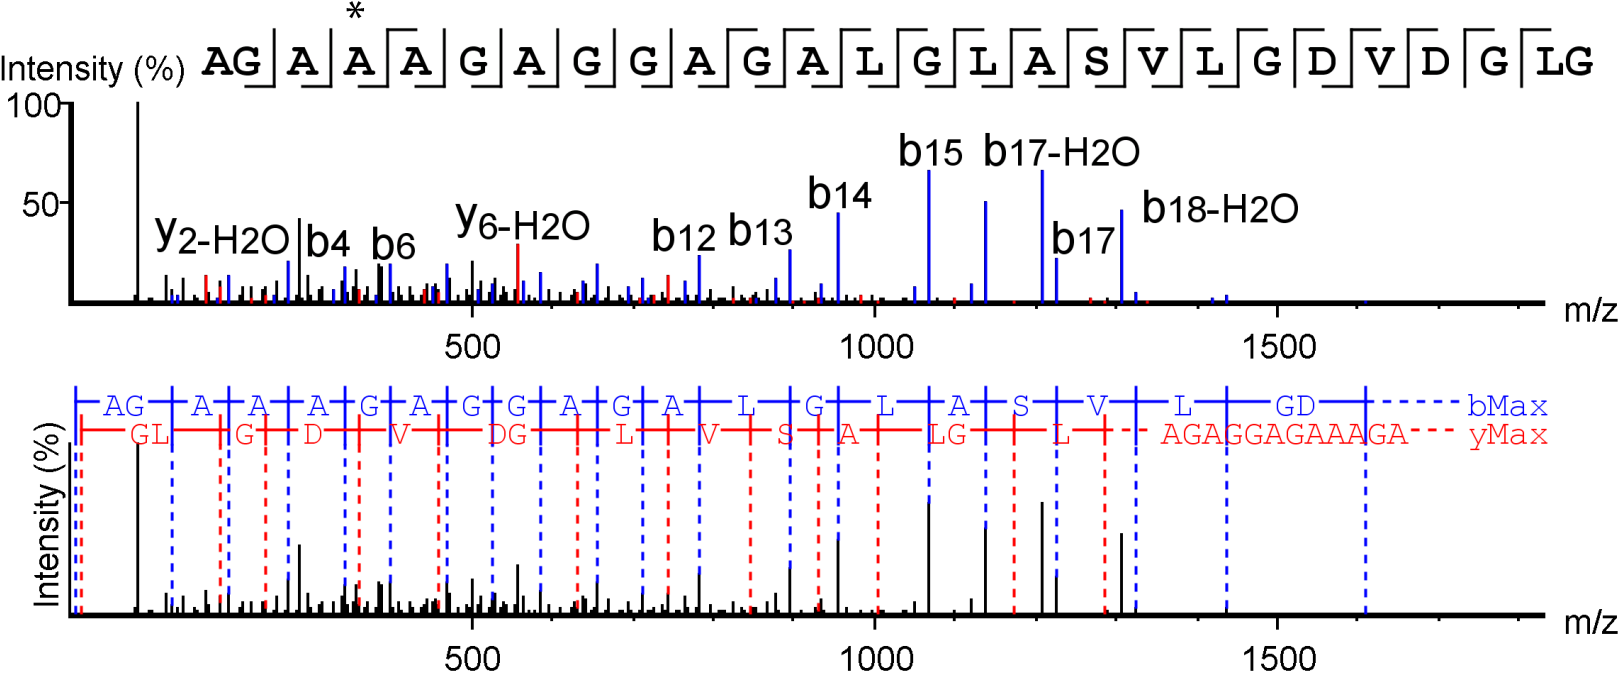

## 7.4 Position (AA): **163**; Mutation **S** → **G**

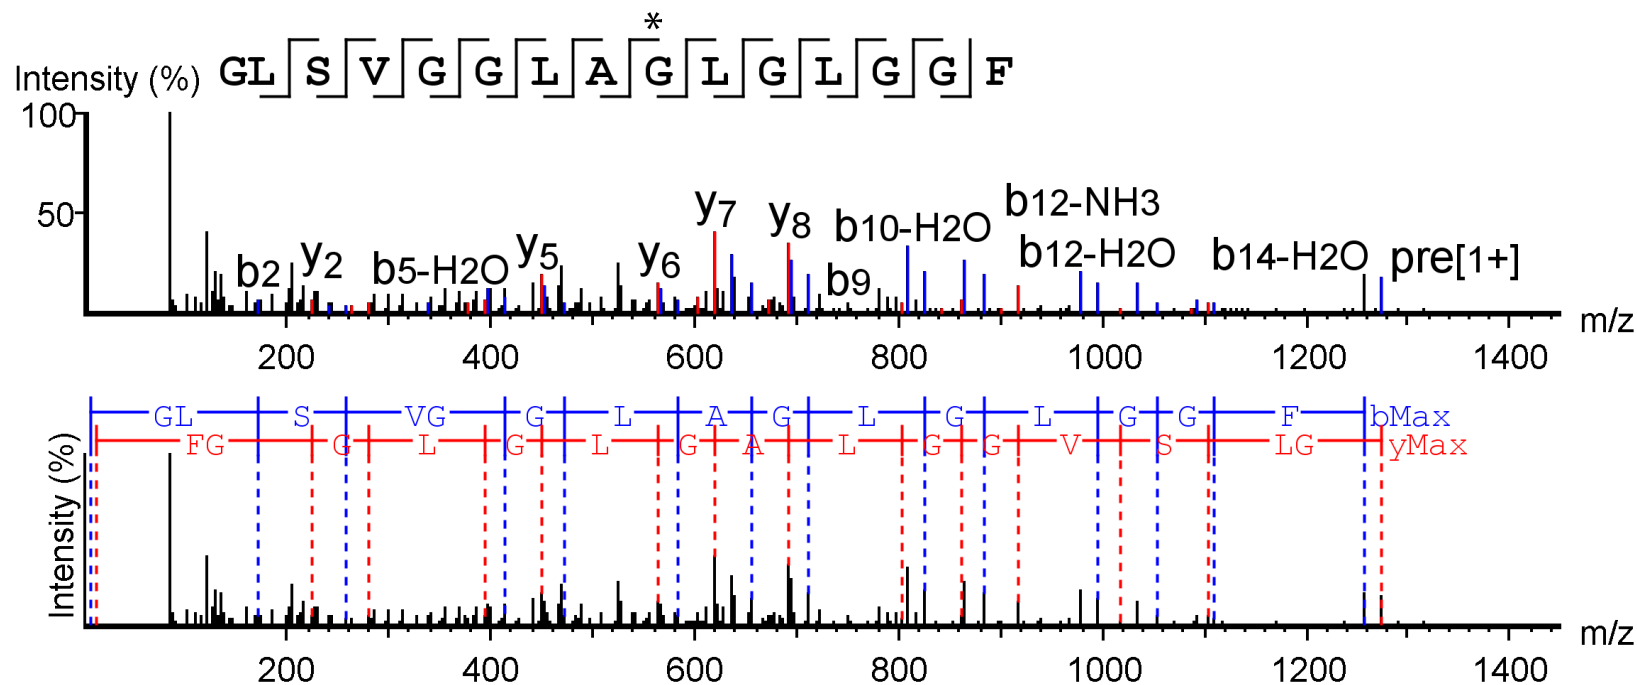

7.5 Position (AA): **163**; Mutation **S** → **G**

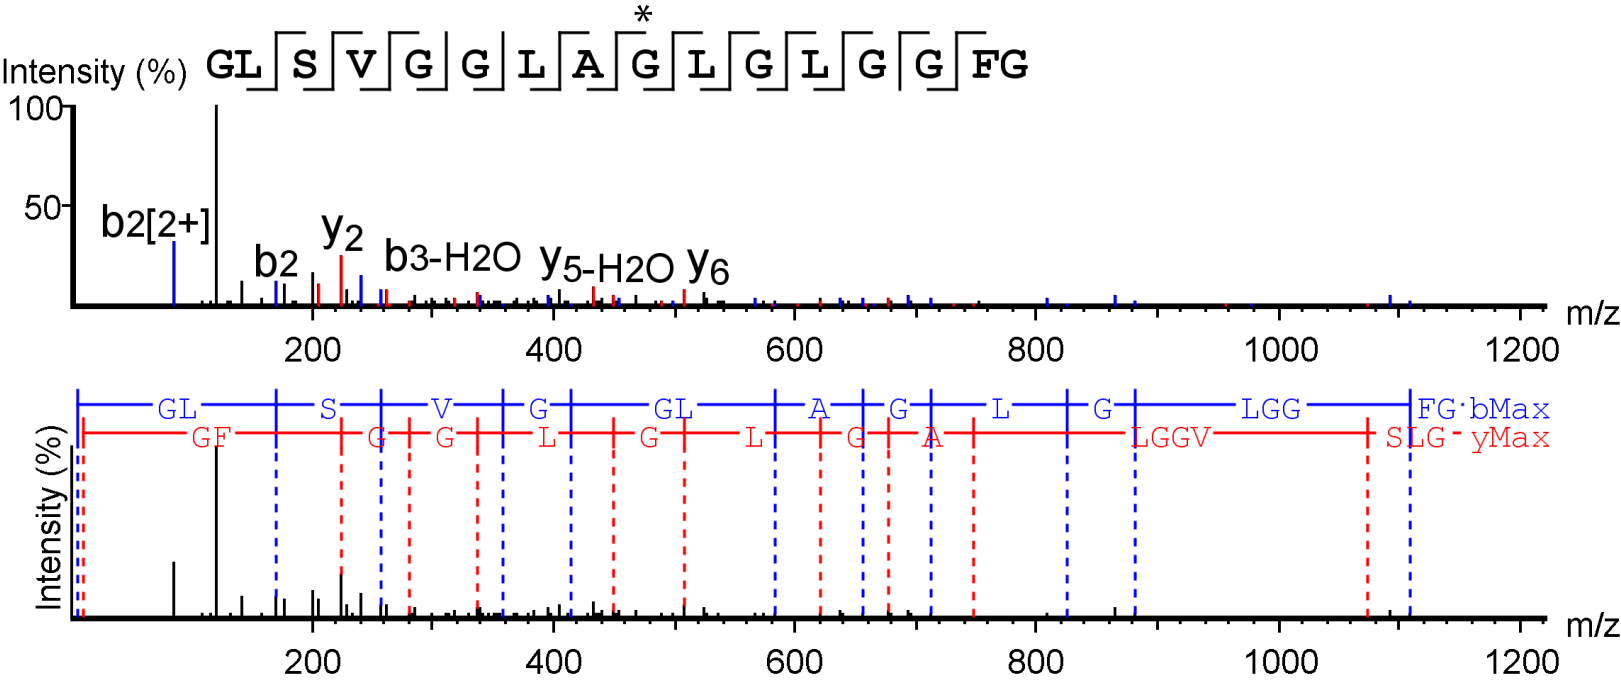

7.6 Position (AA): **289**; Mutation **V** → **L**

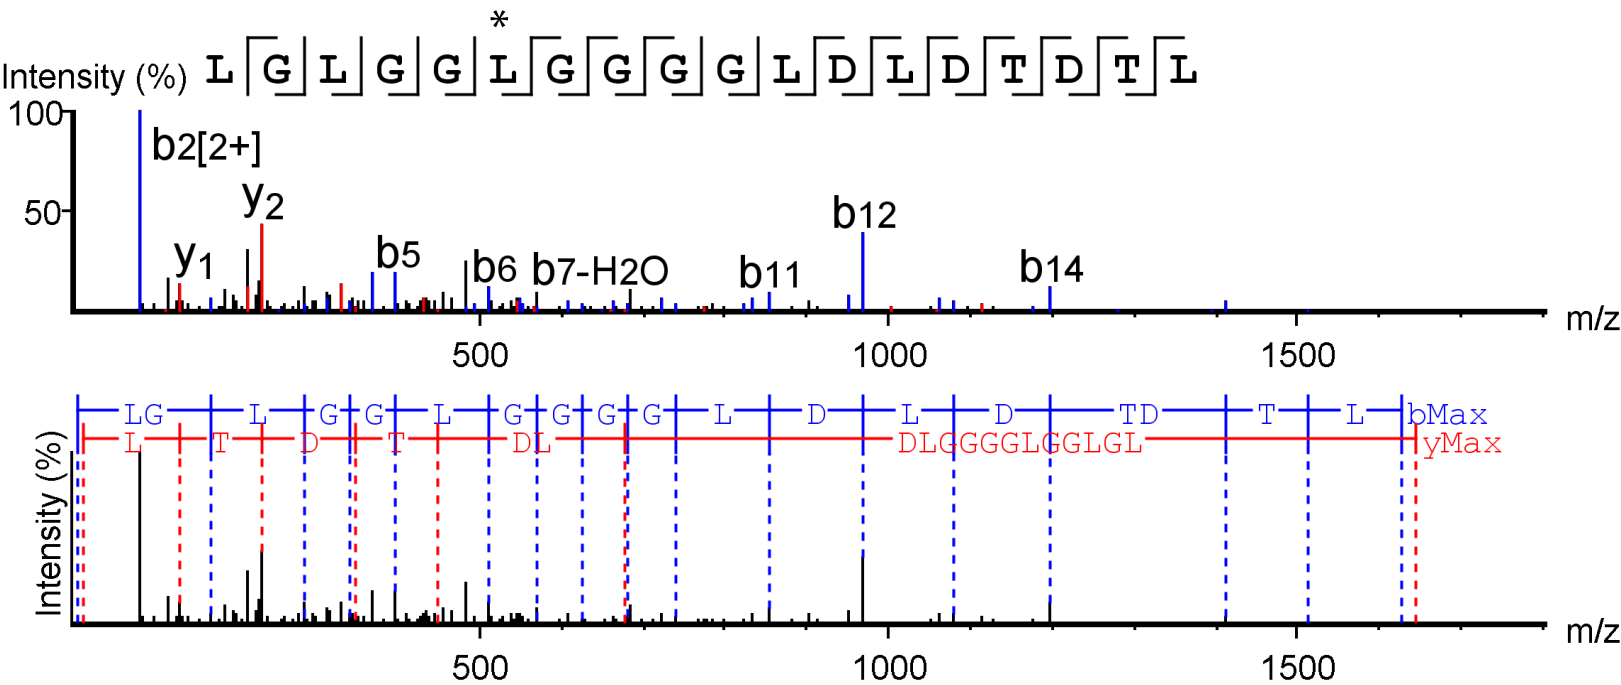

7.7 Position (AA): **289**; Mutation **V** → **L**

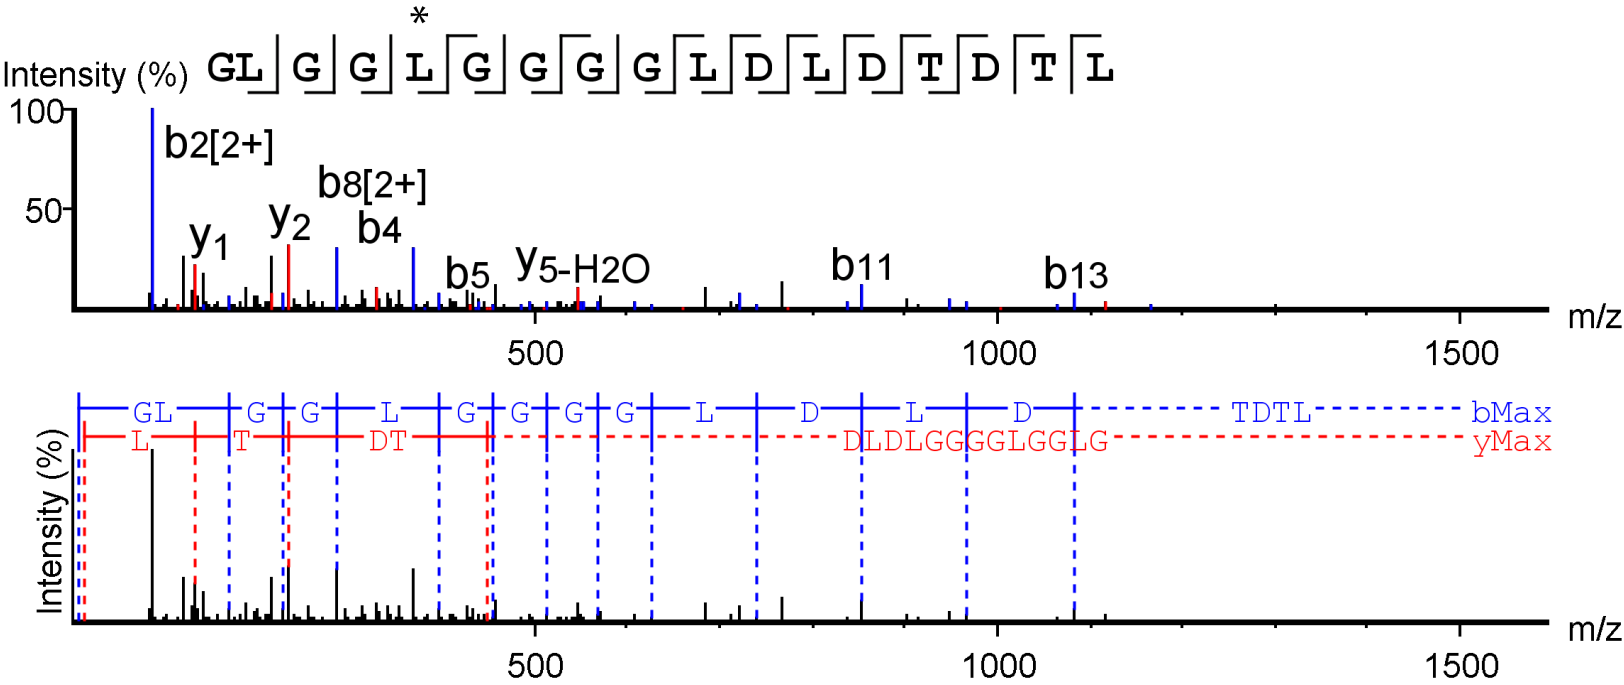

7.8 Position (AA): **310**; Mutation **I** → **F**

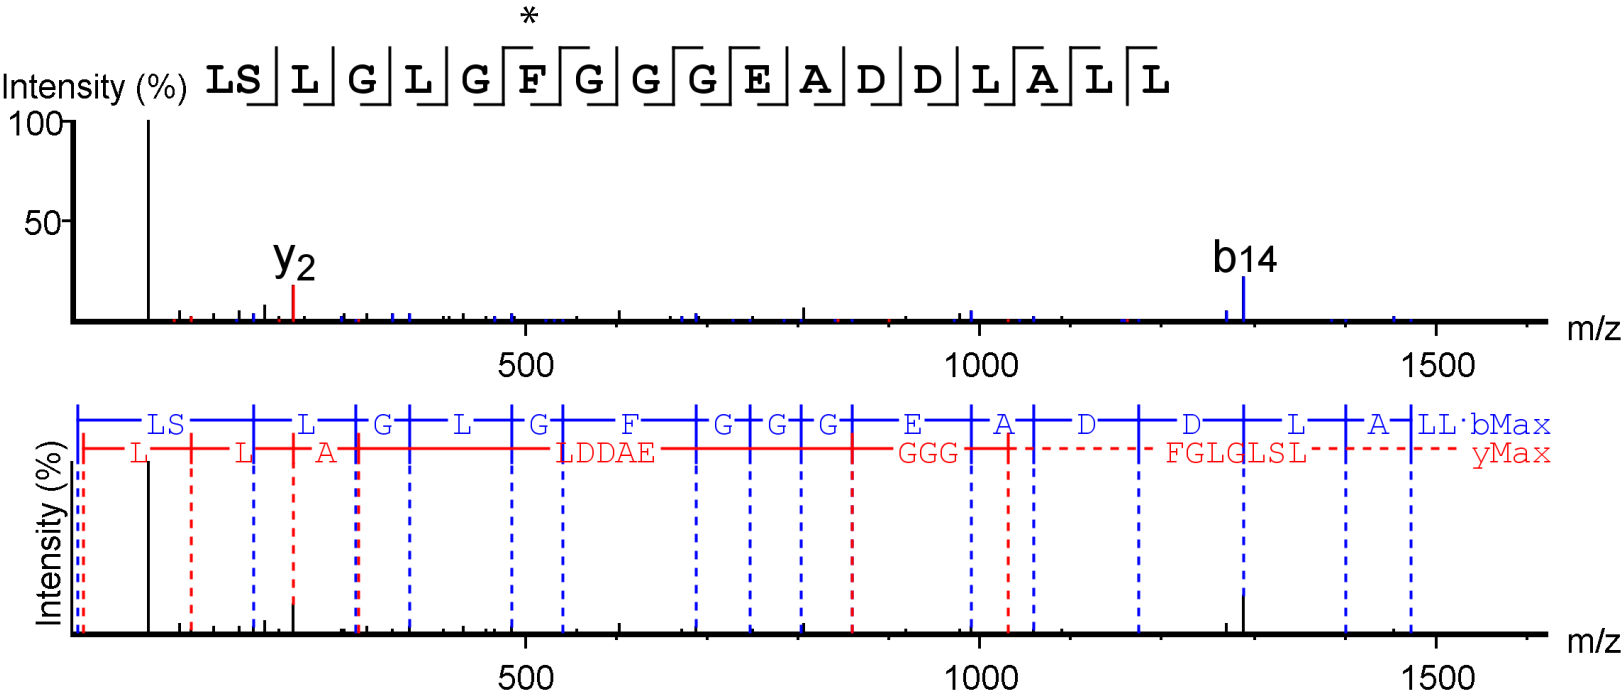

**7.9 Position (AA): 310; Mutation I → F**

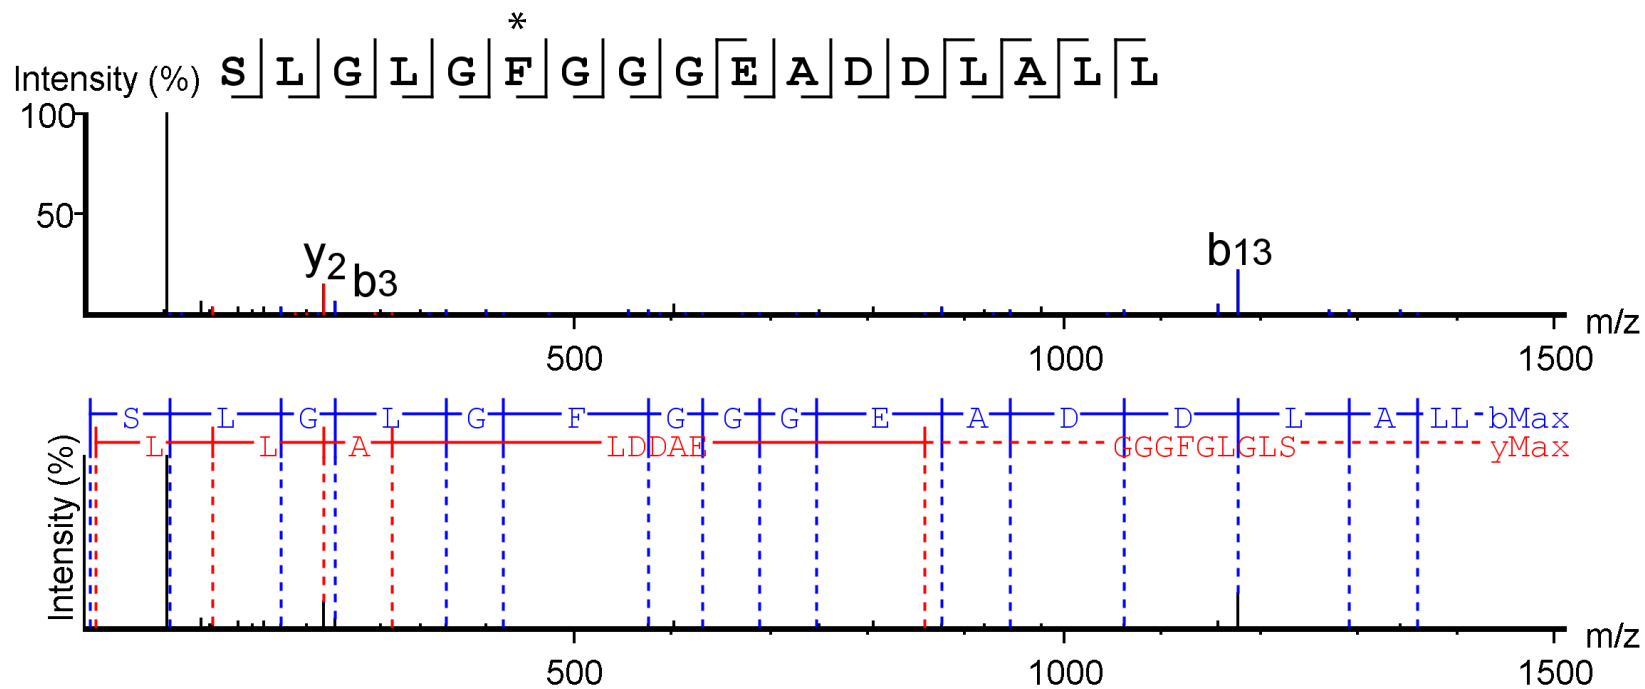

7.10 Position (AA): **804**; Mutation **A** → **S**

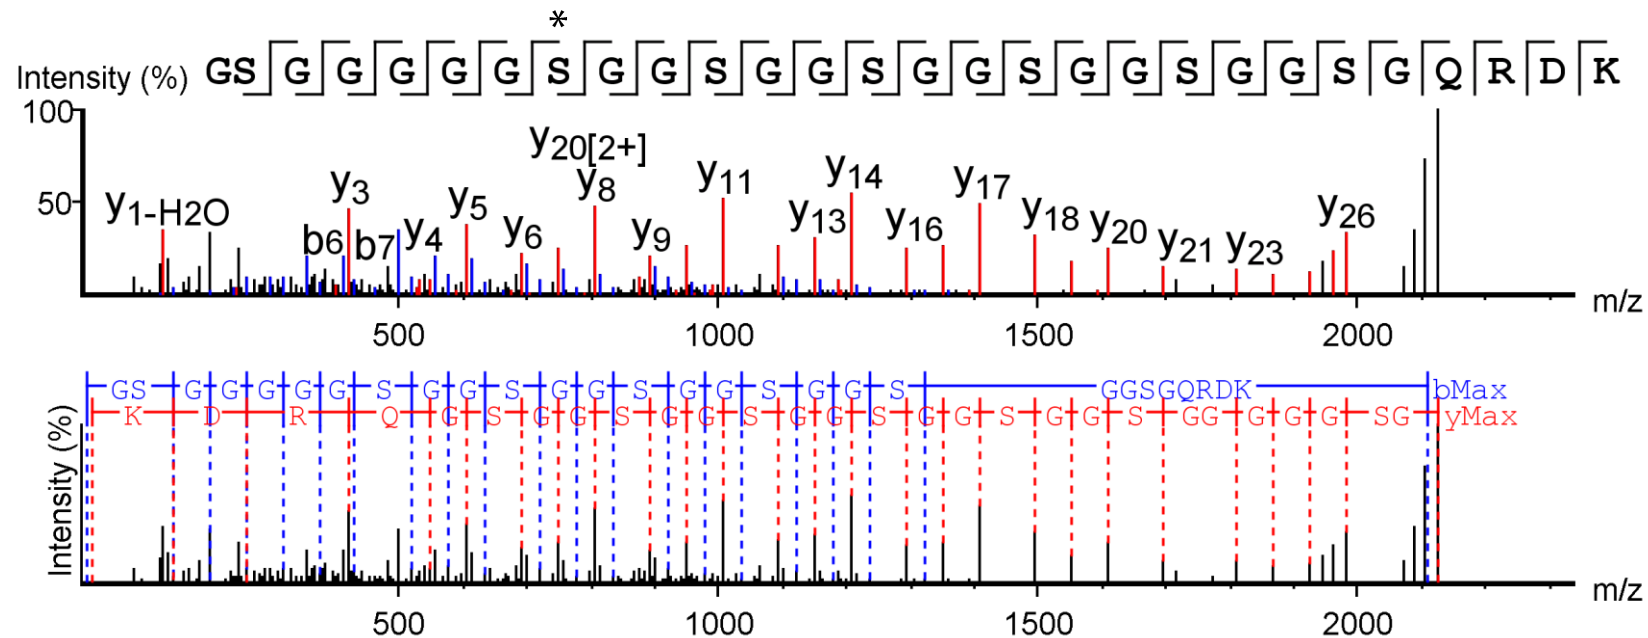

7.11 Position (AA): **804**; Mutation **A** → **S**

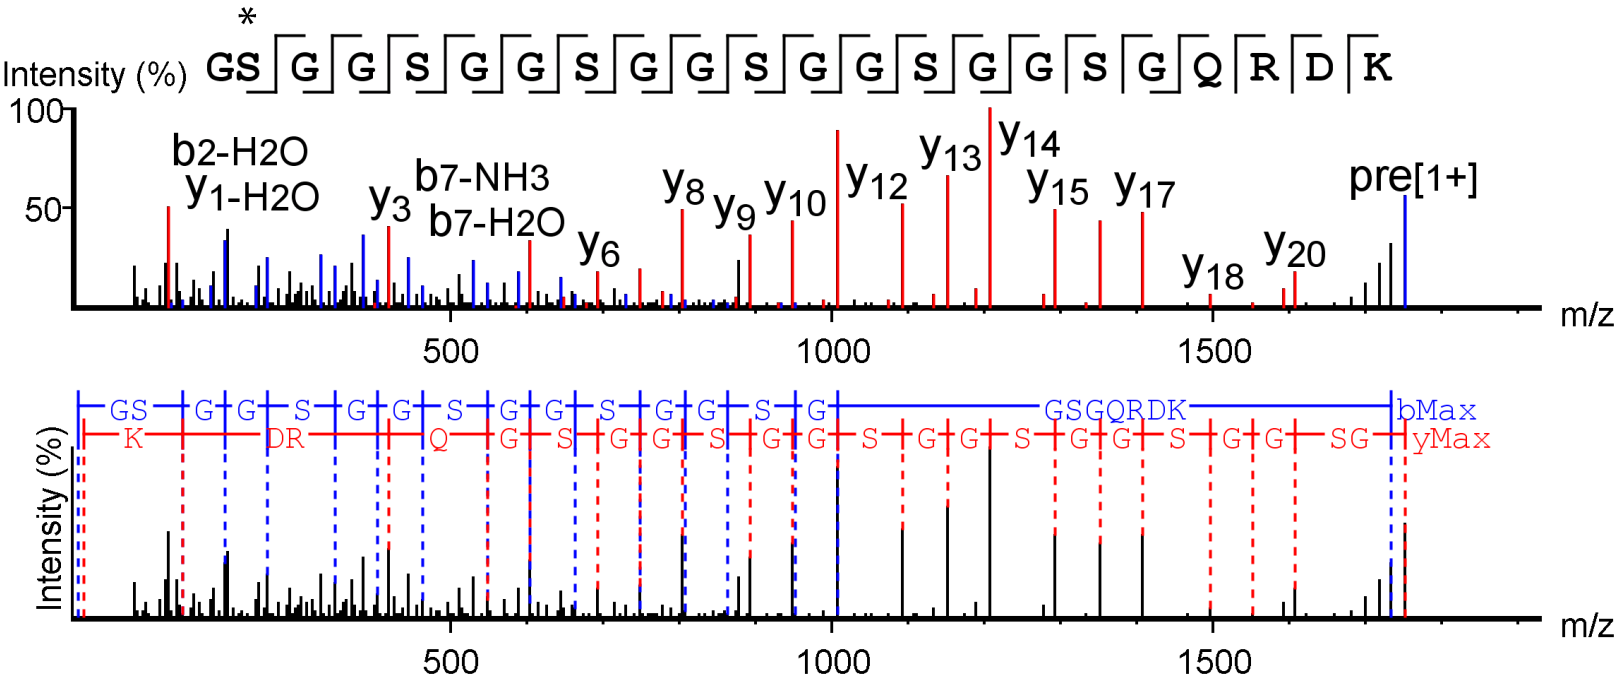

7.12 Position (AA): **822**; Mutation **R** → **G**

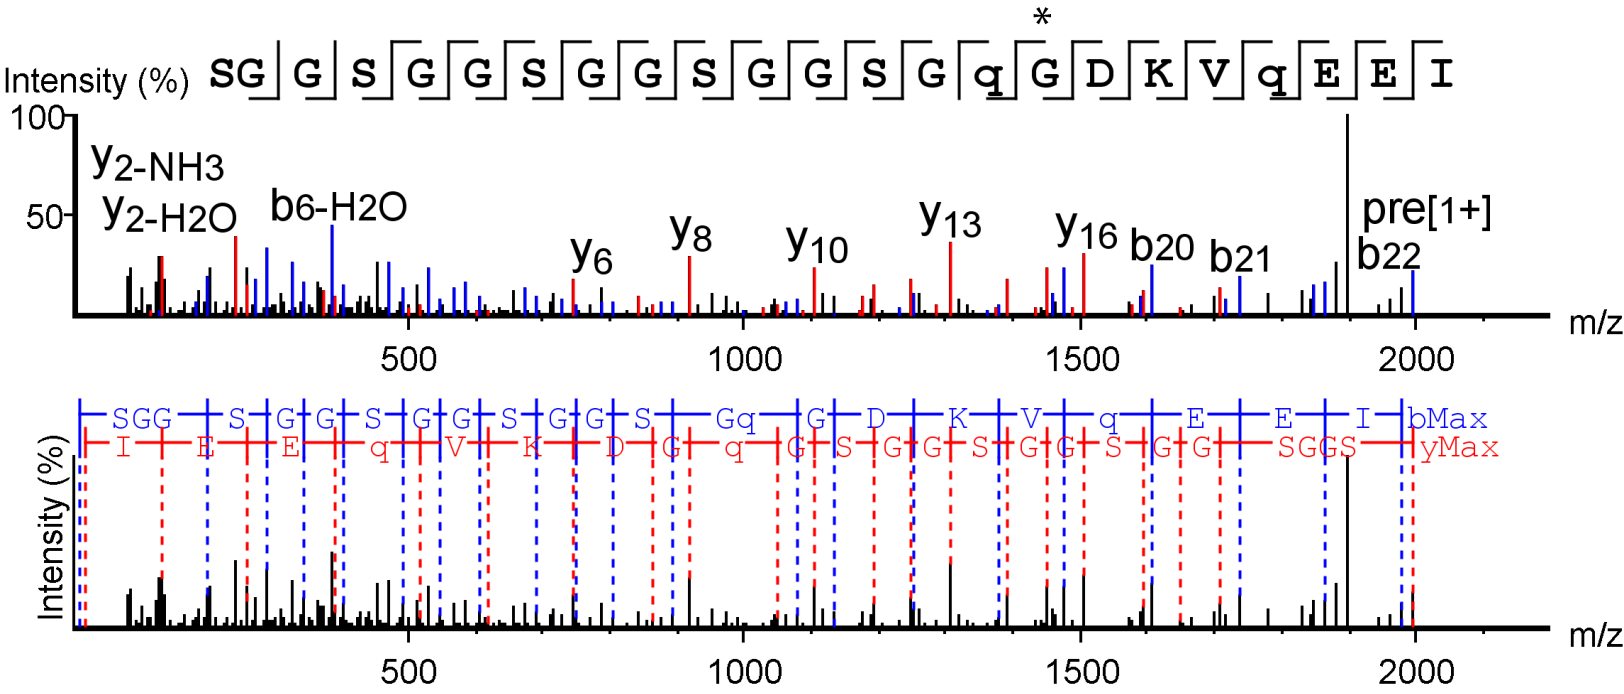

7.13 Position (AA): **822**; Mutation **R** → **G**

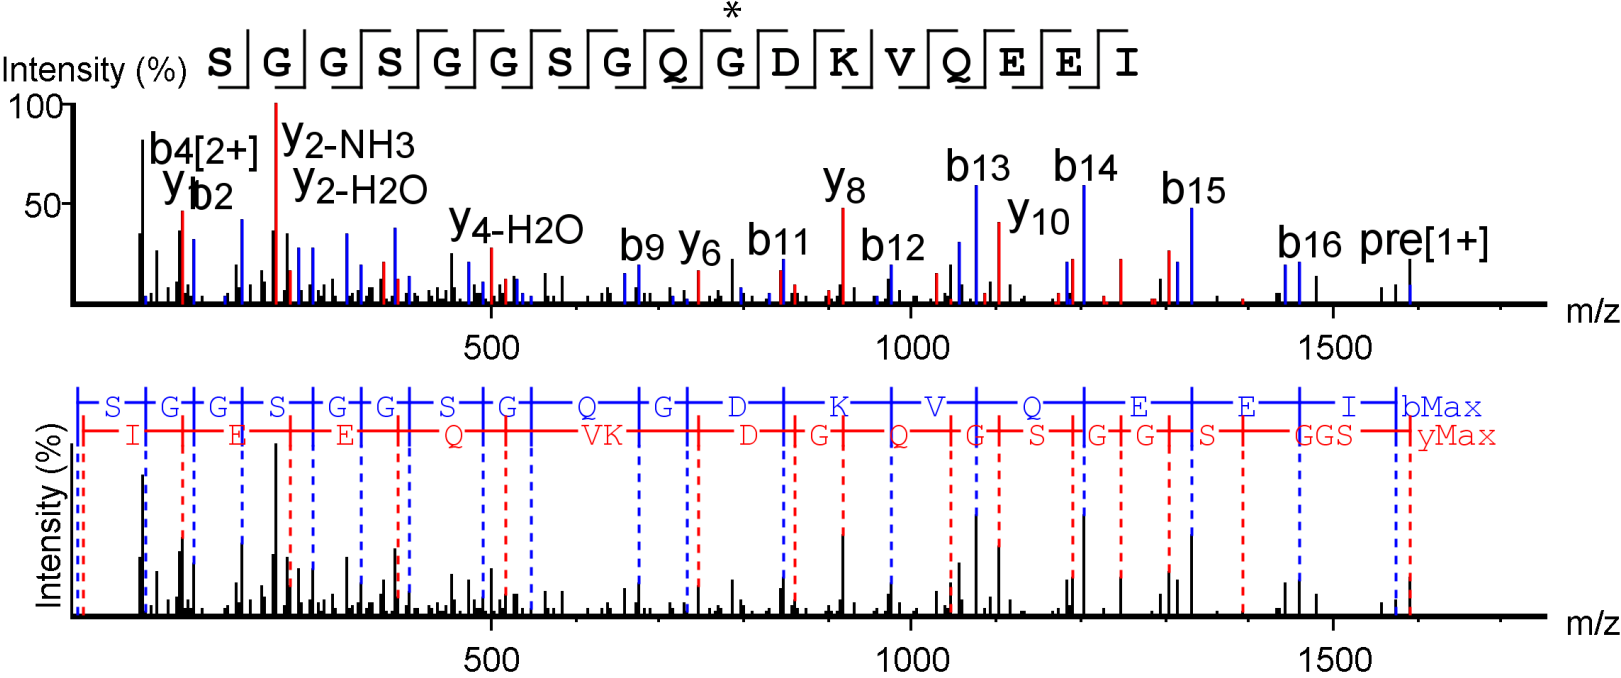

Supplement: supp [file elife-45644-supp-v1.zip › elife_poa_e45644_Figure_6_source_data_1.pdf]
