# Supplementary material for: 'Palaeoshellomics’ reveals the use of freshwater mother-of-pearl in prehistory
Source: eLife journal article supplement (doi:10.7554/elife.45644), 2019-05-06
Supplement: supp [file elife-45644-supp-v1.zip]

Archive with 15 entries (15 files):
- elife_poa_e45644_Figure_6_figure_supplement_6.png
- elife_poa_e45644_Figure_6_source_data_1.pdf
- elife_poa_e45644_Figure_6_figure_supplement_1.png
- elife_poa_e45644_Figure_6_figure_supplement_3.png
- elife_poa_e45644_Figure_4_source_data_1.zip
- elife_poa_e45644_Figure_6_figure_supplement_5.png
- elife_poa_e45644_Figure_6_figure_supplement_7.png
- elife_poa_e45644_Table_2_source_data_1.xlsx
- elife_poa_e45644_Figure_6_figure_supplement_8.png
- elife_poa_e45644_Figure_6_figure_supplement_4.png
- elife_poa_e45644_Figure_6_figure_supplement_10.png
- elife_poa_e45644_Transparent_Reporting_File.docx
- elife_poa_e45644_Figure_6_figure_supplement_2.png
- elife_poa_e45644_Figure_5_source_code_1.c
- elife_poa_e45644_Figure_6_figure_supplement_9.png
