# Supplementary material for: 'Palaeoshellomics’ reveals the use of freshwater mother-of-pearl in prehistory
Source: eLife journal article supplement (doi:10.7554/elife.45644), 2019-05-06
Supplement: supp [file elife-45644-supp-v1.zip › elife_poa_e45644_Table_2_source_data_1.xlsx]

## Sheet: All peptide-protein matches
Sample Name	Protein Accession	Peptide	Unique	-10lgP	Mass	Length	ppm	m/z	z	RT	Intensity	Fraction	Scan	#Spec	Start	End	PTM	AScore	-10lgP (Protein)	Coverage (%)	Intensity (Protein)	#Peptides	#Unique	#Spec (Protein)	Avg. Mass	Description
HavA	1176704634	A.AAAAAEVVDEFGIGALAGA(+28.03).G	Y	54.71	1729.89	19	5.4	577.64	3	92.32	31200000	1	19856	18	90	108	Ethylation	A19:Ethylation:94.67	263.24	35	1940000000	132	132	382	73702	Hic74 [Hyriopsis cumingii]
HavA	1176704634	A.AAAAEVVDEFGIGALAGA(+28.03).G	Y	52.03	1658.85	18	6.2	830.438	2	90.47	107000000	1	19458	15	91	108	Ethylation	A18:Ethylation:79.61	263.24	35	1940000000	132	132	382	73702	Hic74 [Hyriopsis cumingii]
HavA	1176704634	A.AAAAAAAAEVVDEFGIGALAGA(+28.03).G	Y	51.47	1943	22	4.1	648.677	3	99.09	773000	1	21306	6	87	108	Ethylation	A22:Ethylation:35.68	263.24	35	1940000000	132	132	382	73702	Hic74 [Hyriopsis cumingii]
HavA	1176704634	A.AAAAAAAEVVDEFGIGALAGA(+28.03).G	Y	51.27	1871.96	21	5.6	624.998	3	96.28	3180000	1	20706	8	88	108	Ethylation	A21:Ethylation:66.16	263.24	35	1940000000	132	132	382	73702	Hic74 [Hyriopsis cumingii]
HavA	1176704634	A.AAAEVVDEFGIGALAGA(+28.03).G	Y	50.33	1587.81	17	4.3	794.918	2	87.79	9180000	1	18887	5	92	108	Ethylation	A17:Ethylation:57.70	263.24	35	1940000000	132	132	382	73702	Hic74 [Hyriopsis cumingii]
HavA	1176704634	G.G(+71.04)VGGGGLDLDTDTLL.A	Y	49.37	1472.74	15	1.1	737.376	2	102.42	2060000	1	22020	2	288	302	Propionamide (K X@N-term)	G1:Propionamide (K X@N-term):1000.00	263.24	35	1940000000	132	132	382	73702	Hic74 [Hyriopsis cumingii]
HavA	1176704634	A.SVLGDVDGLGGLSALGLGGGL.A	Y	48.89	1825.98	21	0.1	913.997	2	111.92	363000	1	24094	1	124	144			263.24	35	1940000000	132	132	382	73702	Hic74 [Hyriopsis cumingii]
HavA	1176704634	A.SVLGDVDGLGGLSALGLGG.G	Y	48.66	1655.87	19	0.4	828.944	2	110.97	2060000	1	23893	2	124	142			263.24	35	1940000000	132	132	382	73702	Hic74 [Hyriopsis cumingii]
HavA	1176704634	G.V(+71.04)GGGGLDLDTDTLLA.L	Y	48.17	1486.75	15	-0.6	744.383	2	101.89	1080000	1	21904	1	289	303	Propionamide (K X@N-term)	V1:Propionamide (K X@N-term):1000.00	263.24	35	1940000000	132	132	382	73702	Hic74 [Hyriopsis cumingii]
HavA	1176704634	A.SVLGDVDGLGGLSALGLGG(+17.03).G	Y	47.78	1672.9	19	2.2	837.459	2	110.93	619000	1	23883	2	124	142	Replacement of proton with ammonium ion	G19:Replacement of proton with ammonium ion:58.51	263.24	35	1940000000	132	132	382	73702	Hic74 [Hyriopsis cumingii]
HavA	1176704634	K.KIDC(+57.02)EEDDN(+.98)GKYYK.R	Y	47.64	1776.75	14	-0.2	889.383	2	33.56	9370000	2	6721	3	832	845	Carbamidomethylation; Deamidation (NQ)	C4:Carbamidomethylation:1000.00;N9:Deamidation (NQ):1000.00	263.24	35	1940000000	132	132	382	73702	Hic74 [Hyriopsis cumingii]
HavA	1176704634	K.KIDC(+57.02)EEDDN(-17.03)GK.Y	Y	47.06	1304.52	11	-1.2	653.266	2	17.91	563000	2	3367	1	832	842	Carbamidomethylation; Ammonia-loss (N)	C4:Carbamidomethylation:1000.00;N9:Ammonia-loss (N):1000.00	263.24	35	1940000000	132	132	382	73702	Hic74 [Hyriopsis cumingii]
HavA	1176704634	A.AAEVVDEFGIGALAGA(+28.03).G	Y	46.88	1516.78	16	7.7	759.402	2	87.16	7270000	2	18411	7	93	108	Ethylation	A16:Ethylation:76.85	263.24	35	1940000000	132	132	382	73702	Hic74 [Hyriopsis cumingii]
HavA	1176704634	I.DC(+57.02)EEDDN(+.98)GKYYKRVV.K	Y	46.8	1889.81	15	-3	945.909	2	53.77	41800000	2	11114	6	834	848	Carbamidomethylation; Deamidation (NQ)	C2:Carbamidomethylation:1000.00;N7:Deamidation (NQ):1000.00	263.24	35	1940000000	132	132	382	73702	Hic74 [Hyriopsis cumingii]
HavA	1176704634	A.SVLGDVDGLGGLSALGLG(-.98).G	Y	46.65	1597.87	18	-0.9	799.94	2	111.69	0	1	24046	1	124	141	Amidation	G18:Amidation:1000.00	263.24	35	1940000000	132	132	382	73702	Hic74 [Hyriopsis cumingii]
HavA	1176704634	V.Q(-17.03)EEIWKKI.D	Y	46.58	1055.57	8	0.6	528.79	2	76.14	62400000	1	16413	3	826	833	Pyro-glu from Q	Q1:Pyro-glu from Q:1000.00	263.24	35	1940000000	132	132	382	73702	Hic74 [Hyriopsis cumingii]
HavA	1176704634	A.SVLGDVD(+21.98)GLGGL.S	Y	46.52	1122.55	12	0.2	562.284	2	96.93	3180000	1	20845	2	124	135	Sodium adduct	D7:Sodium adduct:18.53	263.24	35	1940000000	132	132	382	73702	Hic74 [Hyriopsis cumingii]
HavA	1176704634	G.G(+71.04)VGGGGLDLDTDTL.L	Y	46.32	1359.65	14	-1.5	680.832	2	92.59	107000000	1	19914	4	288	301	Propionamide (K X@N-term)	G1:Propionamide (K X@N-term):1000.00	263.24	35	1940000000	132	132	382	73702	Hic74 [Hyriopsis cumingii]
HavA	1176704634	A.A(+43.01)AAEVVDEFGIGA.L	Y	45.77	1290.61	13	-0.7	646.311	2	112.87	2250000	1	24300	1	92	104	Carbamylation	A1:Carbamylation:1000.00	263.24	35	1940000000	132	132	382	73702	Hic74 [Hyriopsis cumingii]
HavA	1176704634	A.SVLGDVD(+21.98)GLGGLS.A	Y	44.92	1209.59	13	0.9	605.801	2	92.7	2230000	1	19937	2	124	136	Sodium adduct	D7:Sodium adduct:28.86	263.24	35	1940000000	132	132	382	73702	Hic74 [Hyriopsis cumingii]
HavA	1176704634	K.KIDC(+57.02)EEDDN(+.98)GKY.Y	Y	44.56	1485.59	12	-0.8	743.803	2	31.81	3400000	2	6346	2	832	843	Carbamidomethylation; Deamidation (NQ)	C4:Carbamidomethylation:1000.00;N9:Deamidation (NQ):1000.00	263.24	35	1940000000	132	132	382	73702	Hic74 [Hyriopsis cumingii]
HavA	1176704634	K.KIDC(+57.02)EEDDN(+.98)GK.Y	Y	44.44	1322.53	11	-0.5	662.272	2	17.58	12700000	2	3295	11	832	842	Carbamidomethylation; Deamidation (NQ)	C4:Carbamidomethylation:1000.00;N9:Deamidation (NQ):1000.00	263.24	35	1940000000	132	132	382	73702	Hic74 [Hyriopsis cumingii]
HavA	1176704634	G.G(+71.04)VGGGGLDLDTDTLLA.L	Y	44.21	1543.77	16	-2.9	772.891	2	101.12	2010000	1	21739	3	288	303	Propionamide (K X@N-term)	G1:Propionamide (K X@N-term):1000.00	263.24	35	1940000000	132	132	382	73702	Hic74 [Hyriopsis cumingii]
HavA	1176704634	K.KIDC(+57.02)EEDDNGK.Y	Y	44	1321.55	11	0	661.78	2	16.05	3070000	2	2955	1	832	842	Carbamidomethylation	C4:Carbamidomethylation:1000.00	263.24	35	1940000000	132	132	382	73702	Hic74 [Hyriopsis cumingii]
HavA	1176704634	A.SVLGDVDGLGGLSAL(-.98).G	Y	43.99	1370.74	15	-0.1	686.377	2	104.32	1310000	1	22432	3	124	138	Amidation	L15:Amidation:1000.00	263.24	35	1940000000	132	132	382	73702	Hic74 [Hyriopsis cumingii]
HavA	1176704634	A.SVLGDVDGLGGLSALGL(-.98).G	Y	43.95	1540.85	17	0.5	771.431	2	111.83	370000	1	24075	2	124	140	Amidation	L17:Amidation:1000.00	263.24	35	1940000000	132	132	382	73702	Hic74 [Hyriopsis cumingii]
HavA	1176704634	A.SVLGDVDGLGGLSALG(+17.03).L	Y	43.71	1445.77	16	1.2	723.894	2	103.9	2160000	1	22341	2	124	139	Replacement of proton with ammonium ion	G16:Replacement of proton with ammonium ion:52.53	263.24	35	1940000000	132	132	382	73702	Hic74 [Hyriopsis cumingii]
HavA	1176704634	G.V(+71.04)GGGGLDLDTDTL.L	Y	43.55	1302.63	13	-0.9	652.322	2	92.22	18500000	1	19835	2	289	301	Propionamide (K X@N-term)	V1:Propionamide (K X@N-term):1000.00	263.24	35	1940000000	132	132	382	73702	Hic74 [Hyriopsis cumingii]
HavA	1176704634	K.K(+42.01)IDC(+57.02)EEDDN(+.98)GK.Y	Y	43.11	1364.54	11	1.6	683.278	2	29.73	0	2	5897	1	832	842	Acetylation (N-term); Carbamidomethylation; Deamidation (NQ)	K1:Acetylation (N-term):1000.00;C4:Carbamidomethylation:1000.00;N9:Deamidation (NQ):1000.00	263.24	35	1940000000	132	132	382	73702	Hic74 [Hyriopsis cumingii]
HavA	1176704634	A.SVLGDVDGLGGLSALGLGG(-.98).G	Y	43.02	1654.89	19	-4.1	828.448	2	110.45	493000	1	23779	1	124	142	Amidation	G19:Amidation:1000.00	263.24	35	1940000000	132	132	382	73702	Hic74 [Hyriopsis cumingii]
HavA	1176704634	R.VPILGASAAASAAA.S	Y	42.64	1168.65	14	-0.4	585.33	2	77.51	6290000	1	16702	1	62	75			263.24	35	1940000000	132	132	382	73702	Hic74 [Hyriopsis cumingii]
HavA	1176704634	A.AEVVDEFGIGALAGA(+28.03).G	Y	42.6	1445.74	15	8.2	723.883	2	85.96	352000	1	18496	3	94	108	Ethylation	A15:Ethylation:58.98	263.24	35	1940000000	132	132	382	73702	Hic74 [Hyriopsis cumingii]
HavA	1176704634	G.AGAA(sub G)AGAGGAGALGLASVLGDVDGLG.G	Y	42.45	2067.06	26	-0.8	1034.54	2	111.65	2600000	1	24038	2	108	133			263.24	35	1940000000	132	132	382	73702	Hic74 [Hyriopsis cumingii]
HavA	1176704634	A.AAAAAAAAAEVVDEFGIGALAGA(+28.03).G	Y	42.2	2014.04	23	8.8	672.359	3	102.12	322000	1	21954	1	86	108	Ethylation	A23:Ethylation:29.11	263.24	35	1940000000	132	132	382	73702	Hic74 [Hyriopsis cumingii]
HavA	1176704634	A.SVLGDVDGLGGLS.A	Y	42	1187.6	13	0.3	594.809	2	92.93	77200000	1	19988	7	124	136			263.24	35	1940000000	132	132	382	73702	Hic74 [Hyriopsis cumingii]
HavA	1176704634	G.AGAA(sub G)AGAGGAGALGLASVLGDVDG.L	Y	41.9	1896.95	24	-0.6	949.484	2	103.2	1230000	1	22189	1	108	131			263.24	35	1940000000	132	132	382	73702	Hic74 [Hyriopsis cumingii]
HavA	1176704634	G.L(+71.04)GGVGGGGLDLDTDTL.L	Y	41.89	1529.76	16	-0.4	765.886	2	100.94	37900000	1	21702	6	286	301	Propionamide (K X@N-term)	L1:Propionamide (K X@N-term):1000.00	263.24	35	1940000000	132	132	382	73702	Hic74 [Hyriopsis cumingii]
HavA	1176704634	L.GLASVLGDVDGL.G	Y	41.69	1114.59	12	1.6	1115.6	1	100.15	6920000	1	21534	2	121	132			263.24	35	1940000000	132	132	382	73702	Hic74 [Hyriopsis cumingii]
HavA	1176704634	A.AAAEVVDEFGIGAL.A	Y	41.65	1360.69	14	1.8	681.352	2	102.01	2260000	1	21930	1	92	105			263.24	35	1940000000	132	132	382	73702	Hic74 [Hyriopsis cumingii]
HavA	1176704634	K.VQEEIW(+31.99)KK.I	Y	41.54	1090.57	8	0.2	546.29	2	23.92	108000000	2	4648	4	825	832	Dihydroxy	W6:Dihydroxy:30.46	263.24	35	1940000000	132	132	382	73702	Hic74 [Hyriopsis cumingii]
HavA	1176704634	I.DC(+57.02)EEDDN(+.98)GKYYKRV.V	Y	41.49	1790.74	14	-1.2	896.377	2	42.38	35200000	2	8652	5	834	847	Carbamidomethylation; Deamidation (NQ)	C2:Carbamidomethylation:1000.00;N7:Deamidation (NQ):1000.00	263.24	35	1940000000	132	132	382	73702	Hic74 [Hyriopsis cumingii]
HavA	1176704634	A.SVLGDVDGLGGL.S	Y	41.43	1100.57	12	0.9	551.293	2	97.34	201000000	1	20934	15	124	135			263.24	35	1940000000	132	132	382	73702	Hic74 [Hyriopsis cumingii]
HavA	1176704634	A.SVLGDVDGLGGLSAL.G	Y	41.28	1371.72	15	-0.2	686.869	2	107.24	4780000	1	23072	5	124	138			263.24	35	1940000000	132	132	382	73702	Hic74 [Hyriopsis cumingii]
HavA	1176704634	K.IDC(+57.02)EEDDN(+.98)GKYY.K	Y	41.06	1520.56	12	-0.1	761.288	2	57.85	5230000	2	11979	2	833	844	Carbamidomethylation; Deamidation (NQ)	C3:Carbamidomethylation:1000.00;N8:Deamidation (NQ):1000.00	263.24	35	1940000000	132	132	382	73702	Hic74 [Hyriopsis cumingii]
HavA	1176704634	A.AAAEVVDEFGIGA.L	Y	40.96	1247.6	13	0.1	624.809	2	89.99	51000000	1	19355	6	92	104			263.24	35	1940000000	132	132	382	73702	Hic74 [Hyriopsis cumingii]
HavA	1176704634	A.AAAAAAEVVDEFGIGALAGA(+28.03).G	Y	40.82	1800.93	20	8.9	901.478	2	93.15	1630000	1	20035	2	89	108	Ethylation	A20:Ethylation:49.00	263.24	35	1940000000	132	132	382	73702	Hic74 [Hyriopsis cumingii]
HavA	1176704634	K.IDC(+57.02)EEDDN(+.98)GKYYK.R	Y	40.82	1648.66	13	-1.1	825.335	2	44.28	80000000	2	9070	15	833	845	Carbamidomethylation; Deamidation (NQ)	C3:Carbamidomethylation:1000.00;N8:Deamidation (NQ):1000.00	263.24	35	1940000000	132	132	382	73702	Hic74 [Hyriopsis cumingii]
HavA	1176704634	V.Q(-17.03)EEIWKKID.C	Y	40.25	1170.59	9	0.4	586.303	2	75.26	303000	2	15745	1	826	834	Pyro-glu from Q	Q1:Pyro-glu from Q:1000.00	263.24	35	1940000000	132	132	382	73702	Hic74 [Hyriopsis cumingii]
HavA	1176704634	R.AAASAAAAAAAVSSGDG.S	Y	39.93	1317.62	17	1.1	659.816	2	63.66	550000	2	13222	1	528	544			263.24	35	1940000000	132	132	382	73702	Hic74 [Hyriopsis cumingii]
HavA	1176704634	A.AAAAEVVDEFGI(-.98).G	Y	39.29	1189.6	12	2	595.807	2	89.89	971000	1	19334	1	91	102	Amidation	I12:Amidation:1000.00	263.24	35	1940000000	132	132	382	73702	Hic74 [Hyriopsis cumingii]
HavA	1176704634	A.SVLGDVDGLGGLS(+17.03).A	Y	39.15	1204.63	13	-0.1	603.322	2	92.46	180000000	1	19887	8	124	136	Replacement of proton with ammonium ion	S13:Replacement of proton with ammonium ion:21.68	263.24	35	1940000000	132	132	382	73702	Hic74 [Hyriopsis cumingii]
HavA	1176704634	A.LGLASVLGDVD(+17.03)GLGGL.S	Y	39.13	1471.82	16	-0.6	736.919	2	111.87	501000	1	24084	1	120	135	Replacement of proton with ammonium ion	D11:Replacement of proton with ammonium ion:9.42	263.24	35	1940000000	132	132	382	73702	Hic74 [Hyriopsis cumingii]
HavA	1176704634	A.SVLGDVDGLG(-.98).G	Y	38.84	929.482	10	-0.3	465.748	2	78.17	1900000	1	16841	1	124	133	Amidation	G10:Amidation:1000.00	263.24	35	1940000000	132	132	382	73702	Hic74 [Hyriopsis cumingii]
HavA	1176704634	G.SAAAAAAAAAAAN(+.98)R.A	Y	38.56	1157.58	14	0.2	579.797	2	46.29	995000	2	9509	1	514	527	Deamidation (NQ)	N13:Deamidation (NQ):1000.00	263.24	35	1940000000	132	132	382	73702	Hic74 [Hyriopsis cumingii]
HavA	1176704634	A.LGLGGL(sub V)GGGGLDLDTDTL.L	Y	38.47	1642.84	18	-0.5	822.428	2	105.94	3080000	1	22789	2	284	301			263.24	35	1940000000	132	132	382	73702	Hic74 [Hyriopsis cumingii]
HavA	1176704634	G.GDGDALAASAAR(+15.99).R	Y	38.24	1089.51	12	0	545.76	2	39.99	0	2	8126	1	734	745	Oxidation or Hydroxylation	R12:Oxidation or Hydroxylation:56.68	263.24	35	1940000000	132	132	382	73702	Hic74 [Hyriopsis cumingii]
HavA	1176704634	I.DC(+57.02)EEDDN(+.98)GKYYK.R	Y	38.07	1535.57	12	0.7	768.794	2	32.12	1770000	2	6411	1	834	845	Carbamidomethylation; Deamidation (NQ)	C2:Carbamidomethylation:1000.00;N7:Deamidation (NQ):1000.00	263.24	35	1940000000	132	132	382	73702	Hic74 [Hyriopsis cumingii]
HavA	1176704634	R.AAAAAAAAAAAAAIR(+28.03)N.G	Y	37.93	1352.75	16	-0.5	677.383	2	73.73	0	2	15415	1	748	763	Dimethylation(KR)	R15:Dimethylation(KR):1000.00	263.24	35	1940000000	132	132	382	73702	Hic74 [Hyriopsis cumingii]
HavA	1176704634	I.DC(+57.02)EEDDN(+.98)GKYY.K	Y	37.93	1407.48	11	-0.7	704.745	2	55.69	22600000	2	11520	4	834	844	Carbamidomethylation; Deamidation (NQ)	C2:Carbamidomethylation:1000.00;N7:Deamidation (NQ):1000.00	263.24	35	1940000000	132	132	382	73702	Hic74 [Hyriopsis cumingii]
HavA	1176704634	G.AGAA(sub G)AGAGGAGALGLASVLGDVD.G	Y	37.74	1839.93	23	-0.1	920.973	2	103.59	2090000	1	22276	1	108	130			263.24	35	1940000000	132	132	382	73702	Hic74 [Hyriopsis cumingii]
HavA	1176704634	A.AAEVVDEFGIGA.L	Y	37.69	1176.57	12	0.3	589.29	2	88.61	59200000	1	19060	5	93	104			263.24	35	1940000000	132	132	382	73702	Hic74 [Hyriopsis cumingii]
HavA	1176704634	A.EVVDEFGIGALAGA(+28.03).G	Y	37.56	1374.7	14	7.2	688.364	2	85.18	1820000	1	18330	1	95	108	Ethylation	A14:Ethylation:57.70	263.24	35	1940000000	132	132	382	73702	Hic74 [Hyriopsis cumingii]
HavA	1176704634	A.SVLGDVDGLGGLS(+114.04)ALGLGGGL.A	Y	37.19	1940.02	21	2.8	971.021	2	111.85	0	1	24080	1	124	144	Ubiquitin	S13:Ubiquitin:99.16	263.24	35	1940000000	132	132	382	73702	Hic74 [Hyriopsis cumingii]
HavA	1176704634	A.SVLGDVDGLGGLSALGLGGN(sub G)L.A	Y	37.18	1883	21	-0.2	942.507	2	111.88	1810000	1	24086	1	124	144			263.24	35	1940000000	132	132	382	73702	Hic74 [Hyriopsis cumingii]
HavA	1176704634	A.AAEVVDEFGIGAL.A	Y	37.13	1289.65	13	-1	645.832	2	101.02	3670000	1	21718	1	93	105			263.24	35	1940000000	132	132	382	73702	Hic74 [Hyriopsis cumingii]
HavA	1176704634	R.AAAAAAAAAAAAAIRN(+.98).G	Y	37.13	1325.71	16	0.1	663.86	2	70.99	225000	2	14806	1	748	763	Deamidation (NQ)	N16:Deamidation (NQ):1000.00	263.24	35	1940000000	132	132	382	73702	Hic74 [Hyriopsis cumingii]
HavA	1176704634	A.ALGLGGVGGGGLD(+14.02)LDTDTL.L	Y	36.94	1713.88	19	-1	857.946	2	106.78	16300000	1	22971	4	283	301	Methylation(others)	D13:Methylation(others):32.28	263.24	35	1940000000	132	132	382	73702	Hic74 [Hyriopsis cumingii]
HavA	1176704634	A.LGLASVLGDVDGLGGLS.A	Y	36.86	1541.83	17	-0.4	771.922	2	110.9	321000	1	23877	1	120	136			263.24	35	1940000000	132	132	382	73702	Hic74 [Hyriopsis cumingii]
HavA	1176704634	A.SVLGDVDGLGGLSAL(+17.03).G	Y	36.75	1388.75	15	0.1	695.383	2	107.59	5520000	1	23147	4	124	138	Replacement of proton with ammonium ion	L15:Replacement of proton with ammonium ion:24.66	263.24	35	1940000000	132	132	382	73702	Hic74 [Hyriopsis cumingii]
HavA	1176704634	G.LASVLGDVDGLGGL.S	Y	36.69	1284.69	14	-0.3	643.353	2	103.46	3720000	1	22247	3	122	135			263.24	35	1940000000	132	132	382	73702	Hic74 [Hyriopsis cumingii]
HavA	1176704634	A.SVLGDVD(+37.95)GLGGLS.A	Y	36.57	1225.55	13	-0.9	613.782	2	92.6	1730000	1	19917	1	124	136	Replacement of 2 protons by calcium	D7:Replacement of 2 protons by calcium:15.76	263.24	35	1940000000	132	132	382	73702	Hic74 [Hyriopsis cumingii]
HavA	1176704634	S.GGSGGSGQG(sub R)DKVQEEI.W	Y	36.32	1503.68	16	1.3	752.848	2	47.76	0	2	9826	1	814	829			263.24	35	1940000000	132	132	382	73702	Hic74 [Hyriopsis cumingii]
HavA	1176704634	G.LASVLGDVDGLGGLS.A	Y	36.03	1371.72	15	-2.5	686.868	2	99.91	2210000	1	21482	2	122	136			263.24	35	1940000000	132	132	382	73702	Hic74 [Hyriopsis cumingii]
HavA	1176704634	G.GSAAAAAAAAAASAS(+154.14).R	Y	35.82	1271.67	15	5.8	636.847	2	70.43	2830000	2	14683	1	379	393	Decanoyl	S15:Decanoyl:0.00	263.24	35	1940000000	132	132	382	73702	Hic74 [Hyriopsis cumingii]
HavA	1176704634	N.GKYYKRVV.K	Y	35.6	1011.59	8	0.4	506.801	2	23	2630000	2	4452	1	841	848			263.24	35	1940000000	132	132	382	73702	Hic74 [Hyriopsis cumingii]
HavA	1176704634	L.G(+71.04)GVGGGGLDLDTDTL.L	Y	35.58	1416.67	15	0.9	709.345	2	93.28	1500000	2	19784	1	287	301	Propionamide (K X@N-term)	G1:Propionamide (K X@N-term):1000.00	263.24	35	1940000000	132	132	382	73702	Hic74 [Hyriopsis cumingii]
HavA	1176704634	N.PIAAAAAAAAAAASG.S	Y	35.5	1153.61	15	1.1	577.812	2	75.69	412000	2	15840	1	767	781			263.24	35	1940000000	132	132	382	73702	Hic74 [Hyriopsis cumingii]
HavA	1176704634	A.GGDGDALAASAAR(+15.99).R	Y	35.43	1146.53	13	-4.9	574.268	2	35.49	4840000	2	7143	2	733	745	Oxidation or Hydroxylation	R13:Oxidation or Hydroxylation:46.09	263.24	35	1940000000	132	132	382	73702	Hic74 [Hyriopsis cumingii]
HavA	1176704634	G.LASVLGDVDGLGGLS(+17.03).A	Y	35.37	1388.75	15	-4.1	695.38	2	99.94	1720000	1	21488	2	122	136	Replacement of proton with ammonium ion	S15:Replacement of proton with ammonium ion:49.80	263.24	35	1940000000	132	132	382	73702	Hic74 [Hyriopsis cumingii]
HavA	1176704634	A.AEVVDEFGIGA.L	Y	35.27	1105.53	11	1	553.772	2	88.15	33900000	1	18965	3	94	104			263.24	35	1940000000	132	132	382	73702	Hic74 [Hyriopsis cumingii]
HavA	1176704634	A.SVLGDVD(+17.03)GLGGL.S	Y	35.22	1117.6	12	-0.6	559.806	2	97.79	84000000	1	21029	8	124	135	Replacement of proton with ammonium ion	D7:Replacement of proton with ammonium ion:0.00	263.24	35	1940000000	132	132	382	73702	Hic74 [Hyriopsis cumingii]
HavA	1176704634	G.L(+71.04)GGVGGGGLDLDTDTLLA.L	Y	34.71	1713.88	18	0	857.947	2	108.84	217000	1	23423	1	286	303	Propionamide (K X@N-term)	L1:Propionamide (K X@N-term):1000.00	263.24	35	1940000000	132	132	382	73702	Hic74 [Hyriopsis cumingii]
HavA	1176704634	R.AAAAAAAAAAAAAIRN(+.98)G.Q	Y	34.68	1382.73	17	-0.7	692.37	2	71.43	198000	2	14900	1	748	764	Deamidation (NQ)	N16:Deamidation (NQ):1000.00	263.24	35	1940000000	132	132	382	73702	Hic74 [Hyriopsis cumingii]
HavA	1176704634	A.SVLGDVDGLGG.L	Y	34.67	987.487	11	-0.3	494.751	2	81.87	1030000	1	17626	1	124	134			263.24	35	1940000000	132	132	382	73702	Hic74 [Hyriopsis cumingii]
HavA	1176704634	I.D(+31.97)C(+57.02)EEDDNGKYYKRVV.K	Y	34.66	1920.8	15	-0.2	641.273	3	51.47	0	1	11007	1	834	848	Persulfide; Carbamidomethylation	D1:Persulfide:61.69;C2:Carbamidomethylation:1000.00	263.24	35	1940000000	132	132	382	73702	Hic74 [Hyriopsis cumingii]
HavA	1176704634	A.AAAEVVDEFGI.G	Y	34.55	1119.54	11	-0.5	560.779	2	92.65	4690000	1	19927	1	92	102			263.24	35	1940000000	132	132	382	73702	Hic74 [Hyriopsis cumingii]
HavA	1176704634	L.GLASVLGDVDGLGGL.S	Y	34.45	1341.71	15	0	671.864	2	108.33	4890000	1	23312	2	121	135			263.24	35	1940000000	132	132	382	73702	Hic74 [Hyriopsis cumingii]
HavA	1176704634	K.VQEEIW(+15.99)K.K	Y	34.42	946.476	7	0.6	474.245	2	51.26	0	1	10962	1	825	831	Oxidation (HW)	W6:Oxidation (HW):1000.00	263.24	35	1940000000	132	132	382	73702	Hic74 [Hyriopsis cumingii]
HavA	1176704634	A.AAAAEVVDEF(-.98).G	Y	34.31	1019.49	10	-0.2	510.753	2	78.45	1200000	1	16901	1	91	100	Amidation	F10:Amidation:1000.00	263.24	35	1940000000	132	132	382	73702	Hic74 [Hyriopsis cumingii]
HavA	1176704634	G.LASVLGDVD(+17.03)GLGGL.S	Y	34.27	1301.72	14	0.7	651.867	2	102.83	4300000	1	22110	2	122	135	Replacement of proton with ammonium ion	D9:Replacement of proton with ammonium ion:9.16	263.24	35	1940000000	132	132	382	73702	Hic74 [Hyriopsis cumingii]
HavA	1176704634	A.AAAEVVDEFGIGALA.G	Y	34.19	1431.72	15	-1.7	716.868	2	101.84	306000	1	21894	1	92	106			263.24	35	1940000000	132	132	382	73702	Hic74 [Hyriopsis cumingii]
HavA	1176704634	A.SVLGDVDGLGGLSA.L	Y	34.15	1258.64	14	1.1	630.328	2	95.58	550000	1	20558	1	124	137			263.24	35	1940000000	132	132	382	73702	Hic74 [Hyriopsis cumingii]
HavA	1176704634	G.SAAAAAAAAAAANR.A	Y	34.02	1156.59	14	-1.1	579.304	2	50.16	1220000	2	10340	1	514	527			263.24	35	1940000000	132	132	382	73702	Hic74 [Hyriopsis cumingii]
HavA	1176704634	K.VQEEIWK(+43.01)K.I	Y	33.97	1101.58	8	0.2	551.798	2	58.86	4410000	2	12193	1	825	832	Carbamylation	K7:Carbamylation:9.34	263.24	35	1940000000	132	132	382	73702	Hic74 [Hyriopsis cumingii]
HavA	1176704634	K.VQEEIW(+13.98)KK.I	Y	33.95	1072.56	8	0	537.285	2	31.26	5340000	2	6230	1	825	832	Tryptophan oxidation to oxolactone	W6:Tryptophan oxidation to oxolactone:1000.00	263.24	35	1940000000	132	132	382	73702	Hic74 [Hyriopsis cumingii]
HavA	1176704634	G.SGGSGQ(+.98)G(sub R)DKVQEEI.W	Y	33.89	1390.62	14	-1.7	696.317	2	51.32	963000	2	10587	1	816	829	Deamidation (NQ)	Q6:Deamidation (NQ):64.28	263.24	35	1940000000	132	132	382	73702	Hic74 [Hyriopsis cumingii]
HavA	1176704634	R.AAAAAAAAAAAAAIR.N	Y	33.88	1210.68	15	0.4	606.347	2	69.32	26600000	2	14443	5	748	762			263.24	35	1940000000	132	132	382	73702	Hic74 [Hyriopsis cumingii]
HavA	1176704634	A.AAEVVDE(+37.95)FGIGA.L	Y	33.87	1214.51	12	3	608.266	2	88.73	388000	1	19087	1	93	104	Replacement of 2 protons by calcium	E7:Replacement of 2 protons by calcium:12.28	263.24	35	1940000000	132	132	382	73702	Hic74 [Hyriopsis cumingii]
HavA	1176704634	A.AAAAAEVVDEFGIGAL.A	Y	33.75	1502.76	16	-0.3	752.388	2	105.51	351000	1	22694	1	90	105			263.24	35	1940000000	132	132	382	73702	Hic74 [Hyriopsis cumingii]
HavA	1176704634	A.LSLGLGF(sub I)GGGEADDLALL.S	Y	33.68	1716.89	18	0.1	859.454	2	111.88	1100000	1	24087	1	304	321			263.24	35	1940000000	132	132	382	73702	Hic74 [Hyriopsis cumingii]
HavA	1176704634	L.GLASVLGDVDGLGGLS.A	Y	33.66	1428.75	16	2.1	715.382	2	103.47	4510000	1	22249	1	121	136			263.24	35	1940000000	132	132	382	73702	Hic74 [Hyriopsis cumingii]
HavA	1176704634	G.SGGSGQG(sub R)DKVQEEI.W	Y	33.61	1389.64	14	-0.5	695.826	2	47.44	1520000	2	9759	1	816	829			263.24	35	1940000000	132	132	382	73702	Hic74 [Hyriopsis cumingii]
HavA	1176704634	A.AAAEVVDEFGI(+17.03).G	Y	33.55	1136.57	11	0.5	569.293	2	92.78	2520000	1	19954	1	92	102	Replacement of proton with ammonium ion	I11:Replacement of proton with ammonium ion:0.00	263.24	35	1940000000	132	132	382	73702	Hic74 [Hyriopsis cumingii]
HavA	1176704634	E.VVDEFGIGALAGA(+28.03).G	Y	33.48	1245.66	13	9.9	623.844	2	80.43	2190000	1	17322	1	96	108	Ethylation	A13:Ethylation:40.16	263.24	35	1940000000	132	132	382	73702	Hic74 [Hyriopsis cumingii]
HavA	1176704634	R.VPILGASAAASA.A	Y	33.33	1026.57	12	0.7	514.293	2	75.62	2300000	1	16301	1	62	73			263.24	35	1940000000	132	132	382	73702	Hic74 [Hyriopsis cumingii]
HavA	1176704634	A.LGLASVLGDVDGLGGLS(+17.03).A	Y	33.31	1558.86	17	-1.3	780.435	2	110.82	510000	1	23860	1	120	136	Replacement of proton with ammonium ion	S17:Replacement of proton with ammonium ion:22.09	263.24	35	1940000000	132	132	382	73702	Hic74 [Hyriopsis cumingii]
HavA	1176704634	A.AAAAEVVDEFGIGA(+17.03).L	Y	33.21	1335.67	14	-0.1	668.841	2	92.35	419000	1	19864	1	91	104	Replacement of proton with ammonium ion	A14:Replacement of proton with ammonium ion:23.70	263.24	35	1940000000	132	132	382	73702	Hic74 [Hyriopsis cumingii]
HavA	1176704634	A.AAEVVDE(+17.03)FGI.G	Y	33.15	1065.53	10	1.1	533.775	2	91.32	0	1	19640	1	93	102	Replacement of proton with ammonium ion	E7:Replacement of proton with ammonium ion:14.02	263.24	35	1940000000	132	132	382	73702	Hic74 [Hyriopsis cumingii]
HavA	1176704634	A.AAAAEVVDE(+17.03)FGIGAL.A	Y	33.09	1448.75	15	0.3	725.383	2	103.73	965000	1	22306	1	91	105	Replacement of proton with ammonium ion	E9:Replacement of proton with ammonium ion:15.03	263.24	35	1940000000	132	132	382	73702	Hic74 [Hyriopsis cumingii]
HavA	1176704634	A.SVLGDVDGLGGL(+17.03).S	Y	32.98	1117.6	12	0.1	559.806	2	97.27	0	1	20918	1	124	135	Replacement of proton with ammonium ion	L12:Replacement of proton with ammonium ion:0.00	263.24	35	1940000000	132	132	382	73702	Hic74 [Hyriopsis cumingii]
HavA	1176704634	G.AGAGAGAGGAGALGLAS(+14.02)VLGDVDGL.G	Y	32.68	2010.04	25	0.8	1006.03	2	111.74	0	1	24057	1	108	132	Methylation(others)	S17:Methylation(others):52.86	263.24	35	1940000000	132	132	382	73702	Hic74 [Hyriopsis cumingii]
HavA	1176704634	A.S(sub A)AAAAAAAAAEVVDEFGIGALAGV(sub A).G	Y	32.63	2101.07	24	3.4	1051.55	2	106.44	121000	1	22896	1	85	108			263.24	35	1940000000	132	132	382	73702	Hic74 [Hyriopsis cumingii]
HavA	1176704634	A.GR(sub A)GAGAGGAGALGLASVLGDVDGLG.G	Y	32.61	2067.07	25	-5.1	690.027	3	111.65	1470000	1	24039	1	109	133			263.24	35	1940000000	132	132	382	73702	Hic74 [Hyriopsis cumingii]
HavA	1176704634	G.A(+71.04)GAGAGAGGAGALGLASVLGDVD.G	Y	32.49	1896.95	23	3.6	949.488	2	104.13	0	1	22391	1	108	130	Propionamide (K X@N-term)	A1:Propionamide (K X@N-term):1000.00	263.24	35	1940000000	132	132	382	73702	Hic74 [Hyriopsis cumingii]
HavA	1176704634	K.VQEEIW(+31.99)K.K	Y	32.44	962.471	7	1.3	482.243	2	53.49	5520000	1	11446	2	825	831	Dihydroxy	W6:Dihydroxy:20.92	263.24	35	1940000000	132	132	382	73702	Hic74 [Hyriopsis cumingii]
HavA	1176704634	F.GGAAS(sub A)AAAAAAAAAEVVDEFGIGALAGV(sub A).G	Y	32.39	2357.19	28	4.3	786.739	3	111.56	0	1	24020	1	81	108			263.24	35	1940000000	132	132	382	73702	Hic74 [Hyriopsis cumingii]
HavA	1176704634	A.AAEVVDEFGI.G	Y	32.38	1048.51	10	-0.3	525.261	2	91.25	3340000	1	19625	1	93	102			263.24	35	1940000000	132	132	382	73702	Hic74 [Hyriopsis cumingii]
HavA	1176704634	K.VQEEIW(+15.99)KK.I	Y	32.3	1074.57	8	-0.1	538.293	2	23.17	2740000	2	4487	1	825	832	Oxidation (HW)	W6:Oxidation (HW):1000.00	263.24	35	1940000000	132	132	382	73702	Hic74 [Hyriopsis cumingii]
HavA	1176704634	A.SVLGDVDGL.G	Y	32.29	873.444	9	2.9	874.454	1	88.05	8040000	1	18942	1	124	132			263.24	35	1940000000	132	132	382	73702	Hic74 [Hyriopsis cumingii]
HavA	1176704634	G.SGGSGQG(sub R)DKVQEEIWKKI.D	Y	32.26	1944.99	18	1.9	649.339	3	64.76	0	1	13939	1	816	833			263.24	35	1940000000	132	132	382	73702	Hic74 [Hyriopsis cumingii]
HavA	1176704634	K.IDC(+57.02)EEDDN(+.98)GKYYKRVV.K	Y	32.22	2002.89	16	1.6	668.64	3	55.54	0	2	11489	1	833	848	Carbamidomethylation; Deamidation (NQ)	C3:Carbamidomethylation:1000.00;N8:Deamidation (NQ):1000.00	263.24	35	1940000000	132	132	382	73702	Hic74 [Hyriopsis cumingii]
HavA	1176704634	L.GLASVLGDVDGLGGLS(+17.03).A	Y	32.11	1445.77	16	1.8	723.895	2	103.37	6540000	1	22228	1	121	136	Replacement of proton with ammonium ion	S16:Replacement of proton with ammonium ion:24.66	263.24	35	1940000000	132	132	382	73702	Hic74 [Hyriopsis cumingii]
HavA	1176704634	A.W(sub A)AAAEVVDEFGIGALV(sub A)GA.G	Y	32	1773.89	18	2.7	887.957	2	111.86	241000	1	24082	1	91	108			263.24	35	1940000000	132	132	382	73702	Hic74 [Hyriopsis cumingii]
HavA	1176704634	A.AAAEVVDEFGIGA(+17.03).L	Y	31.9	1264.63	13	-0.8	633.322	2	89.98	43900000	1	19353	1	92	104	Replacement of proton with ammonium ion	A13:Replacement of proton with ammonium ion:0.00	263.24	35	1940000000	132	132	382	73702	Hic74 [Hyriopsis cumingii]
HavA	1176704634	R.VPILGASAAASAA.A	Y	31.87	1097.61	13	0.4	549.812	2	76.38	1390000	1	16465	1	62	74			263.24	35	1940000000	132	132	382	73702	Hic74 [Hyriopsis cumingii]
HavA	1176704634	G.KYYKRVV.K	Y	31.82	954.565	7	1	478.29	2	21.68	3960000	2	4173	1	842	848			263.24	35	1940000000	132	132	382	73702	Hic74 [Hyriopsis cumingii]
HavA	1176704634	A.SVLGD(-18.01)VDGLGGL.S	Y	31.65	1082.56	12	-0.8	542.287	2	100.9	1380000	1	21693	1	124	135	Dehydration	D5:Dehydration:0.00	263.24	35	1940000000	132	132	382	73702	Hic74 [Hyriopsis cumingii]
HavA	1176704634	I.DC(+57.02)EEDDNGKYYKRVV.K	Y	31.62	1888.83	15	-0.8	630.615	3	50.29	3920000	2	10369	1	834	848	Carbamidomethylation	C2:Carbamidomethylation:1000.00	263.24	35	1940000000	132	132	382	73702	Hic74 [Hyriopsis cumingii]
HavA	1176704634	K.IDC(+57.02)EEDDN(+.98)GK.Y	Y	31.3	1194.43	10	0.1	598.225	2	20.09	77700000	2	3829	3	833	842	Carbamidomethylation; Deamidation (NQ)	C3:Carbamidomethylation:1000.00;N8:Deamidation (NQ):1000.00	263.24	35	1940000000	132	132	382	73702	Hic74 [Hyriopsis cumingii]
HavA	1176704634	R.VPILGASAAASAAA(+17.03).S	Y	31.29	1185.67	14	-0.7	593.843	2	77.61	3100000	1	16724	1	62	75	Replacement of proton with ammonium ion	A14:Replacement of proton with ammonium ion:1000.00	263.24	35	1940000000	132	132	382	73702	Hic74 [Hyriopsis cumingii]
HavA	1176704634	S.RFEQYVP(+31.99)GH.G	Y	31.18	1163.54	9	-4.2	582.773	2	49.31	0	2	10161	1	30	38	Dihydroxy	P7:Dihydroxy:55.92	263.24	35	1940000000	132	132	382	73702	Hic74 [Hyriopsis cumingii]
HavA	1176704634	A.GR(sub A)GAGAGGAGALGLASVLGDVDG.L	Y	31.17	1896.97	23	-6.7	949.484	2	102.67	0	1	22075	1	109	131			263.24	35	1940000000	132	132	382	73702	Hic74 [Hyriopsis cumingii]
HavA	1176704634	L.ASVLGDVDGLGGLS.A	Y	30.96	1258.64	14	0.6	630.328	2	93.82	1560000	1	20177	2	123	136			263.24	35	1940000000	132	132	382	73702	Hic74 [Hyriopsis cumingii]
HavA	1176704634	A.AAAAGGDGDALAASAAR(+15.99).R	Y	30.92	1430.67	17	0.9	716.345	2	46.15	362000	2	9479	1	729	745	Oxidation or Hydroxylation	R17:Oxidation or Hydroxylation:40.94	263.24	35	1940000000	132	132	382	73702	Hic74 [Hyriopsis cumingii]
HavA	1176704634	A.AEVVDEFGIGAL.A	Y	30.8	1218.61	12	-1.7	610.313	2	100.65	2080000	1	21642	1	94	105			263.24	35	1940000000	132	132	382	73702	Hic74 [Hyriopsis cumingii]
HavA	1176704634	A.SVLGDVD(+37.95)GLGGL.S	Y	30.75	1138.52	12	-2.1	570.265	2	96.9	441000	1	20839	1	124	135	Replacement of 2 protons by calcium	D7:Replacement of 2 protons by calcium:0.00	263.24	35	1940000000	132	132	382	73702	Hic74 [Hyriopsis cumingii]
HavA	1176704634	S.LGLGGFGGQ(sub E)GGGGFGGEGEGE.G	Y	30.68	1794.78	21	-1	898.397	2	91.28	1030000	1	19631	1	164	184			263.24	35	1940000000	132	132	382	73702	Hic74 [Hyriopsis cumingii]
HavA	1176704634	G.L(+27.99)GAGIGLGAGLGA.G	Y	30.57	1053.58	13	-1.4	527.797	2	112.96	2300000	1	24321	1	262	274	Formylation	L1:Formylation:1000.00	263.24	35	1940000000	132	132	382	73702	Hic74 [Hyriopsis cumingii]
HavA	1176704634	G.LGGL(sub V)GGGGLDLDTDTL.L	Y	30.56	1472.74	16	-1.3	737.374	2	97.55	8550000	1	20978	1	286	301			263.24	35	1940000000	132	132	382	73702	Hic74 [Hyriopsis cumingii]
HavA	1176704634	S.VLGDVDGLGGL.S	Y	30.54	1013.54	11	-0.1	507.777	2	93.9	1630000	1	20193	1	125	135			263.24	35	1940000000	132	132	382	73702	Hic74 [Hyriopsis cumingii]
HavA	1176704634	I.D(+31.97)C(+57.02)EEDDNGKYY.K	Y	30.51	1438.47	11	-1.7	720.239	2	53.61	0	1	11472	1	834	844	Persulfide; Carbamidomethylation	D1:Persulfide:33.81;C2:Carbamidomethylation:1000.00	263.24	35	1940000000	132	132	382	73702	Hic74 [Hyriopsis cumingii]
HavA	1176704634	A.EVVDEFGIGA.L	Y	30.47	1034.49	10	0.2	518.253	2	87.39	2390000	1	18800	1	95	104			263.24	35	1940000000	132	132	382	73702	Hic74 [Hyriopsis cumingii]
HavA	1176704634	K.IDC(+57.02)EEDDN(+.98)GKY.Y	Y	30.41	1357.5	11	-0.9	679.756	2	43.94	3390000	2	8995	1	833	843	Carbamidomethylation; Deamidation (NQ)	C3:Carbamidomethylation:1000.00;N8:Deamidation (NQ):1000.00	263.24	35	1940000000	132	132	382	73702	Hic74 [Hyriopsis cumingii]
HavA	1176704634	R.AAASAAAAAAAVS(+17.03).S	Y	30.4	1018.54	13	-0.1	510.277	2	59.35	0	2	12299	1	528	540	Replacement of proton with ammonium ion	S13:Replacement of proton with ammonium ion:1000.00	263.24	35	1940000000	132	132	382	73702	Hic74 [Hyriopsis cumingii]
HavA	1176704634	K.VQEEIW(+3.99)K.K	Y	30.31	934.476	7	0.5	468.245	2	54.47	32000000	2	11263	3	825	831	Tryptophan oxidation to kynurenin	W6:Tryptophan oxidation to kynurenin:1000.00	263.24	35	1940000000	132	132	382	73702	Hic74 [Hyriopsis cumingii]
HavA	1176704634	R.DKVQEEIW(+15.99)K.K	Y	30.21	1189.6	9	-0.2	595.806	2	54.43	331000	1	11647	1	823	831	Oxidation (HW)	W8:Oxidation (HW):1000.00	263.24	35	1940000000	132	132	382	73702	Hic74 [Hyriopsis cumingii]
HavA	1176704634	R.VPILGASAAASA(+17.03).A	Y	30.21	1043.6	12	-0.8	522.806	2	75.76	0	1	16331	1	62	73	Replacement of proton with ammonium ion	A12:Replacement of proton with ammonium ion:1000.00	263.24	35	1940000000	132	132	382	73702	Hic74 [Hyriopsis cumingii]
HavA	1176704634	L.GLASVLGDVD(+21.98)GLGGL.S	Y	30.2	1363.7	15	1.8	682.856	2	108.08	1990000	1	23255	1	121	135	Sodium adduct	D10:Sodium adduct:12.81	263.24	35	1940000000	132	132	382	73702	Hic74 [Hyriopsis cumingii]
HavA	1176704634	A.AAAAAAAIR.N	Y	29.98	784.456	9	-0.3	393.235	2	28.55	12500000	2	5639	1	754	762			263.24	35	1940000000	132	132	382	73702	Hic74 [Hyriopsis cumingii]
HavA	1176704634	D.GLGGLS(+162.05)ALGLGGGL.A	Y	29.93	1302.7	14	-7	652.354	2	101.79	1400000	1	21885	1	131	144	Hexose (NSY)	S6:Hexose (NSY):1000.00	263.24	35	1940000000	132	132	382	73702	Hic74 [Hyriopsis cumingii]
HavA	1176704634	I.DC(+57.02)EEDDN(+.98)GKY.Y	Y	29.89	1244.41	10	0.1	623.214	2	30.56	2850000	2	6081	1	834	843	Carbamidomethylation; Deamidation (NQ)	C2:Carbamidomethylation:1000.00;N7:Deamidation (NQ):1000.00	263.24	35	1940000000	132	132	382	73702	Hic74 [Hyriopsis cumingii]
HavA	1176704634	D.GDALAASAAR(+15.99).R	Y	29.83	917.457	10	-0.2	459.736	2	27.57	5960000	2	5432	1	736	745	Oxidation or Hydroxylation	R10:Oxidation or Hydroxylation:97.21	263.24	35	1940000000	132	132	382	73702	Hic74 [Hyriopsis cumingii]
HavA	1176704634	A.AAAEVVDE(+17.03)FGIGAL.A	Y	29.76	1377.71	14	-1.8	689.863	2	102.05	2620000	1	21938	1	92	105	Replacement of proton with ammonium ion	E8:Replacement of proton with ammonium ion:10.40	263.24	35	1940000000	132	132	382	73702	Hic74 [Hyriopsis cumingii]
HavA	1176704634	A.SVLGDVDGLGGLSALG.L	Y	29.66	1428.75	16	0.9	715.381	2	105.5	707000	1	22693	1	124	139			263.24	35	1940000000	132	132	382	73702	Hic74 [Hyriopsis cumingii]
HavA	1176704634	K.KIDC(+57.02)EEDDN.G	Y	29.5	1136.43	9	-0.5	569.222	2	19.44	2350000	2	3693	1	832	840	Carbamidomethylation	C4:Carbamidomethylation:1000.00	263.24	35	1940000000	132	132	382	73702	Hic74 [Hyriopsis cumingii]
HavA	1176704634	K.KIDC(+57.02)EEDDN(+.98).G	Y	29.44	1137.41	9	-0.6	569.714	2	21.59	19500000	2	4152	1	832	840	Carbamidomethylation; Deamidation (NQ)	C4:Carbamidomethylation:1000.00;N9:Deamidation (NQ):1000.00	263.24	35	1940000000	132	132	382	73702	Hic74 [Hyriopsis cumingii]
HavA	1176704634	A.AAAAAAAAAIR.N	Y	29.29	926.53	11	-0.4	464.272	2	45.65	3340000	2	9370	1	752	762			263.24	35	1940000000	132	132	382	73702	Hic74 [Hyriopsis cumingii]
HavA	1176704634	G.AS(sub A)LGLGGL(sub V)GGGGLDLDTDTL.L	Y	29.25	1800.91	20	-0.9	901.462	2	106.79	4030000	1	22973	1	282	301			263.24	35	1940000000	132	132	382	73702	Hic74 [Hyriopsis cumingii]
HavA	1176704634	R.F(+87.03)EQYVPG.H	Y	29.18	925.418	7	0	463.716	2	75.54	1630000	1	16286	1	31	37	Glycidamide adduct	F1:Glycidamide adduct:1000.00	263.24	35	1940000000	132	132	382	73702	Hic74 [Hyriopsis cumingii]
HavA	1176704634	V.QEEIWKKI.D	Y	29.17	1072.59	8	-1.4	537.302	2	59.16	50000000	2	12259	1	826	833			263.24	35	1940000000	132	132	382	73702	Hic74 [Hyriopsis cumingii]
HavA	1176704634	L.GLASVLGDVD(+17.03)GLGGL.S	Y	29.07	1358.74	15	-0.7	680.377	2	106.96	3180000	1	23010	1	121	135	Replacement of proton with ammonium ion	D10:Replacement of proton with ammonium ion:0.00	263.24	35	1940000000	132	132	382	73702	Hic74 [Hyriopsis cumingii]
HavA	1176704634	K.KIDC(+57.02)EEDDN(+.98)G.K	Y	28.87	1194.43	10	0	598.225	2	24.14	1390000	2	4693	1	832	841	Carbamidomethylation; Deamidation (NQ)	C4:Carbamidomethylation:1000.00;N9:Deamidation (NQ):1000.00	263.24	35	1940000000	132	132	382	73702	Hic74 [Hyriopsis cumingii]
HavA	1176704634	L.GLASVLGDVDGLGGL(+17.03).S	Y	28.7	1358.74	15	-0.1	680.377	2	107.98	4910000	1	23234	1	121	135	Replacement of proton with ammonium ion	L15:Replacement of proton with ammonium ion:22.57	263.24	35	1940000000	132	132	382	73702	Hic74 [Hyriopsis cumingii]
HavA	1176704634	K.N(sub I)DCEEDDNGKYYKRVV.K	Y	28.69	1945.85	16	0.3	649.623	3	51.38	0	2	10599	1	833	848			263.24	35	1940000000	132	132	382	73702	Hic74 [Hyriopsis cumingii]
HavA	1176704634	K.KIDC(+57.02)EEDD.N	Y	28.57	1022.39	8	0.6	512.201	2	20.37	4800000	2	3888	1	832	839	Carbamidomethylation	C4:Carbamidomethylation:1000.00	263.24	35	1940000000	132	132	382	73702	Hic74 [Hyriopsis cumingii]
HavA	1176704634	A.AAAEVVDEFGI(-.98).G	Y	28.38	1118.56	11	0.2	560.288	2	87.52	290000	1	18828	1	92	102	Amidation	I11:Amidation:1000.00	263.24	35	1940000000	132	132	382	73702	Hic74 [Hyriopsis cumingii]
HavA	1176704634	G.SGGSGQ(+.98)G(sub R)DKVQ(+.98)EEI.W	Y	28.19	1391.61	14	-0.8	696.809	2	54.58	2130000	2	11286	1	816	829	Deamidation (NQ)	Q6:Deamidation (NQ):1000.00;Q11:Deamidation (NQ):1000.00	263.24	35	1940000000	132	132	382	73702	Hic74 [Hyriopsis cumingii]
HavA	1176704634	S.VLGDVDGLGGLS.A	Y	28.16	1100.57	12	0	551.293	2	88.66	2390000	1	19071	1	125	136			263.24	35	1940000000	132	132	382	73702	Hic74 [Hyriopsis cumingii]
HavA	1176704634	A.SVLGDVDGLGGLS(-.98).A	Y	28.02	1186.62	13	-0.5	594.317	2	91.03	1850000	1	19579	1	124	136	Amidation	S13:Amidation:1000.00	263.24	35	1940000000	132	132	382	73702	Hic74 [Hyriopsis cumingii]
HavA	1176704634	A.SVLGD(+17.03)VDGLGGL.S	Y	27.98	1117.6	12	0	559.806	2	100.95	0	1	21703	1	124	135	Replacement of proton with ammonium ion	D5:Replacement of proton with ammonium ion:20.41	263.24	35	1940000000	132	132	382	73702	Hic74 [Hyriopsis cumingii]
HavA	1176704634	D.K(+172.05)VQEEIWKKI.D	Y	27.94	1471.81	10	-3.9	491.608	3	65.26	726000	1	14046	1	824	833	Menadione hydroquinone derivative	K1:Menadione hydroquinone derivative:100.04	263.24	35	1940000000	132	132	382	73702	Hic74 [Hyriopsis cumingii]
HavA	1176704634	A.SVLGDVD(+15.99)GLGGLSAL.G	Y	27.88	1387.72	15	-0.6	694.867	2	98.47	442000	1	21174	1	124	138	Oxidation or Hydroxylation	D7:Oxidation or Hydroxylation:11.10	263.24	35	1940000000	132	132	382	73702	Hic74 [Hyriopsis cumingii]
HavA	1176704634	A.AAAIR(+80.99)NGQNPIAAAAAAAAAAASG.S	Y	27.85	2130.06	24	0.9	711.027	3	86.29	1810000	1	18568	1	758	781	Arginine replacement by Nitropyrimidyl ornithine	R5:Arginine replacement by Nitropyrimidyl ornithine:1000.00	263.24	35	1940000000	132	132	382	73702	Hic74 [Hyriopsis cumingii]
HavA	1176704634	A.AAAAEVVDEFGIGA.L	Y	27.84	1318.64	14	1.2	660.328	2	90.77	415000	1	19522	1	91	104			263.24	35	1940000000	132	132	382	73702	Hic74 [Hyriopsis cumingii]
HavA	1176704634	R.AAASAAAAAAAVSSG.D	Y	27.62	1145.57	15	4.9	573.794	2	62.24	0	2	12916	1	528	542			263.24	35	1940000000	132	132	382	73702	Hic74 [Hyriopsis cumingii]
HavA	1176704634	A.AAEVVDEFGIGALA.G	Y	27.57	1360.69	14	2.5	681.353	2	100.74	268000	1	21660	1	93	106			263.24	35	1940000000	132	132	382	73702	Hic74 [Hyriopsis cumingii]
HavA	1176704634	I.DC(+57.02)EEDDNGKYYKRV.V	Y	27.54	1789.76	14	1.8	597.594	3	34.91	1110000	2	7016	1	834	847	Carbamidomethylation	C2:Carbamidomethylation:1000.00	263.24	35	1940000000	132	132	382	73702	Hic74 [Hyriopsis cumingii]
HavA	1176704634	G.AGAA(sub G)AGAGGAGALGLASVLGDVN(sub D).G	Y	27.49	1838.95	23	-0.6	920.481	2	101.82	972000	1	21891	1	108	130			263.24	35	1940000000	132	132	382	73702	Hic74 [Hyriopsis cumingii]
HavA	1176704634	A.SVLGDVDGLGGL(-.98).S	Y	27.37	1099.59	12	1.4	550.802	2	91.6	2580000	1	19701	1	124	135	Amidation	L12:Amidation:1000.00	263.24	35	1940000000	132	132	382	73702	Hic74 [Hyriopsis cumingii]
HavA	1176704634	A.GALGLASVLGD(+17.03)VDGL.G	Y	27.34	1372.76	15	2.6	687.387	2	109.29	388000	1	23523	1	118	132	Replacement of proton with ammonium ion	D11:Replacement of proton with ammonium ion:17.01	263.24	35	1940000000	132	132	382	73702	Hic74 [Hyriopsis cumingii]
HavA	1176704634	A.ALGLGGVGGGGLD(+14.02)LDTDT.L	Y	27.33	1600.79	18	1.9	801.406	2	98.72	176000	1	21228	1	283	300	Methylation(others)	D13:Methylation(others):32.28	263.24	35	1940000000	132	132	382	73702	Hic74 [Hyriopsis cumingii]
HavA	1176704634	A.GR(sub A)GAGAGGAGALGLASVLGDVD.G	Y	27.24	1839.94	22	-3.5	920.976	2	104.1	0	1	22385	1	109	130			263.24	35	1940000000	132	132	382	73702	Hic74 [Hyriopsis cumingii]
HavA	1176704634	L.GLASVLGD(+17.03)VDGLGGL.S	Y	27.15	1358.74	15	0	680.378	2	109.03	546000	1	23464	1	121	135	Replacement of proton with ammonium ion	D8:Replacement of proton with ammonium ion:26.31	263.24	35	1940000000	132	132	382	73702	Hic74 [Hyriopsis cumingii]
HavA	1176704634	G.SGGSGGSGGSGQR(+14.02)DKVQEEI.W	Y	27.07	1904.88	20	2.3	635.97	3	55	597000	1	11767	1	810	829	Methylation(KR)	R13:Methylation(KR):0.00	263.24	35	1940000000	132	132	382	73702	Hic74 [Hyriopsis cumingii]
HavA	1176704634	L.GDVDGLGGLS(+75.98)ALGLGGGL.A	Y	27.04	1602.77	18	1.5	802.396	2	80.53	0	1	17343	1	127	144	EDT	S10:EDT:1000.00	263.24	35	1940000000	132	132	382	73702	Hic74 [Hyriopsis cumingii]
HavA	1176704634	G.DGDALAASAAR(+15.99).R	Y	27.04	1032.48	11	-1.6	517.248	2	46.78	3070000	2	9618	1	735	745	Oxidation or Hydroxylation	R11:Oxidation or Hydroxylation:69.05	263.24	35	1940000000	132	132	382	73702	Hic74 [Hyriopsis cumingii]
HavA	2772914	L.GGLGGGLGGGLGGLGGGAGGAGAGGNG(+43.04).G	Y	45.92	1923.95	27	-5.7	962.977	2	92.71	1960000	2	19656	2	768	794	Carboxyl modification with ethanolamine	G27:Carboxyl modification with ethanolamine:1000.00	147.05	8	182000000	16	16	29	80315	precollagen D [Mytilus edulis]
HavA	2772914	G.GLGGGLGGGLGGLGGGAGGAGAGGNG(+43.04).G	Y	43.54	1866.93	26	-4.8	934.468	2	95.05	143000000	2	20179	9	769	794	Carboxyl modification with ethanolamine	G26:Carboxyl modification with ethanolamine:1000.00	147.05	8	182000000	16	16	29	80315	precollagen D [Mytilus edulis]
HavA	2772914	L.GGLGGGLGGGLGGLGGGAGG(-.98).A	Y	41.97	1395.72	20	1.3	698.869	2	79.68	667000	1	17162	1	768	787	Amidation	G20:Amidation:1000.00	147.05	8	182000000	16	16	29	80315	precollagen D [Mytilus edulis]
HavA	2772914	A.GGLGGGLGGGLGGLGGAGG(-.98).L	Y	40.39	1338.7	19	2.2	670.359	2	80.23	4360000	1	17279	1	744	762	Amidation	G19:Amidation:1000.00	147.05	8	182000000	16	16	29	80315	precollagen D [Mytilus edulis]
HavA	2772914	G.GGAGGAGAGGN(+203.08)GGAGAGGAG.G	Y	39.72	1502.63	20	-2	752.323	2	31.39	575000	2	6257	1	783	802	HexNAcylation (N)	N11:HexNAcylation (N):1000.00	147.05	8	182000000	16	16	29	80315	precollagen D [Mytilus edulis]
HavA	2772914	G.LGGLGGGLGGGLGGLGGGAGGAGAGGN(+43.04).G	Y	37.09	1980.01	27	-4.6	991.01	2	100.52	1280000	1	21613	1	767	793	Carboxyl modification with ethanolamine	N27:Carboxyl modification with ethanolamine:1000.00	147.05	8	182000000	16	16	29	80315	precollagen D [Mytilus edulis]
HavA	2772914	A.GGLGGGLGGGLGGLGGAGGLGG(+387.13).G	Y	35.77	1953.94	22	2.7	977.98	2	91.42	0	1	19661	1	744	765	Triglutamyl	G22:Triglutamyl:1000.00	147.05	8	182000000	16	16	29	80315	precollagen D [Mytilus edulis]
HavA	2772914	A.GGLGGGLGGGLGGLGGA(-.98).G	Y	35.52	1224.66	17	-0.4	613.336	2	81.43	2660000	1	17532	2	744	760	Amidation	A17:Amidation:1000.00	147.05	8	182000000	16	16	29	80315	precollagen D [Mytilus edulis]
HavA	2772914	G.L(+71.04)GGLGGGLGGGLGGLGGGAG.G	Y	34.14	1523.81	20	-2.7	762.908	2	93.4	624000	1	20087	1	767	786	Propionamide (K X@N-term)	L1:Propionamide (K X@N-term):1000.00	147.05	8	182000000	16	16	29	80315	precollagen D [Mytilus edulis]
HavA	2772914	G.LGGGLGGGLGGLGGGAGGAGAGGNG(+43.04).G	Y	33.86	1809.91	25	-5.9	905.956	2	92.2	5390000	1	19829	2	770	794	Carboxyl modification with ethanolamine	G25:Carboxyl modification with ethanolamine:1000.00	147.05	8	182000000	16	16	29	80315	precollagen D [Mytilus edulis]
HavA	2772914	G.GGAGGAGAGGN(+203.08)GGAGAG.G	Y	32.18	1317.55	17	1.2	659.785	2	26.85	1390000	2	5280	1	783	799	HexNAcylation (N)	N11:HexNAcylation (N):1000.00	147.05	8	182000000	16	16	29	80315	precollagen D [Mytilus edulis]
HavA	2772914	A.GGLGGGLGGGLGGLGGAGG.L	Y	31.98	1339.68	19	-1.5	670.848	2	83.9	3610000	1	18055	1	744	762			147.05	8	182000000	16	16	29	80315	precollagen D [Mytilus edulis]
HavA	2772914	L.GGGLGGGLGGLGGGAGGAGAGGNG(+43.04).G	Y	29.65	1696.82	24	-9.2	849.412	2	85.95	5680000	2	18142	2	771	794	Carboxyl modification with ethanolamine	G24:Carboxyl modification with ethanolamine:1000.00	147.05	8	182000000	16	16	29	80315	precollagen D [Mytilus edulis]
HavA	2772914	A.GGLGGFGS(+14.02)AAANAAAAA.R	Y	29.48	1346.66	17	3.1	674.338	2	82.26	2640000	1	17708	1	109	125	Methylation(others)	S8:Methylation(others):1000.00	147.05	8	182000000	16	16	29	80315	precollagen D [Mytilus edulis]
HavA	2772914	G.GAGGAGAGGN(+162.05)GGAGAGGAG.G	Y	28.13	1404.59	19	3.3	703.303	2	27.38	0	2	5392	1	784	802	Hexose (NSY)	N10:Hexose (NSY):1000.00	147.05	8	182000000	16	16	29	80315	precollagen D [Mytilus edulis]
HavA	2772914	L.GGLGGGLGGGLGGLGGGAG.G	Y	27.91	1339.68	19	-3.6	670.847	2	85.35	0	2	18006	1	768	786			147.05	8	182000000	16	16	29	80315	precollagen D [Mytilus edulis]
HavA	2772914	A.GGLGGGLGGGLGGLGGAG(+17.03).G	Y	27.34	1299.69	18	0.4	650.852	2	84.26	7690000	1	18133	1	744	761	Replacement of proton with ammonium ion	G18:Replacement of proton with ammonium ion:1000.00	147.05	8	182000000	16	16	29	80315	precollagen D [Mytilus edulis]
HavA	2204081	G.A(+71.04)GGGAGGGAGGGAGAGA.G	N	39.1	1142.51	17	0.4	572.261	2	23.52	15000000	2	4561	1	119	135	Propionamide (K X@N-term)	A1:Propionamide (K X@N-term):1000.00	138.11	17	22200000	21	6	34	61723	insoluble protein [Pinctada fucata]
HavA	2204081	G.AGAGGGAGGGAGGGAGAGAGAG(+14.02).A	Y	37.52	1398.62	22	-0.5	700.319	2	31.88	2370000	2	6361	1	117	138	Methylation(C-term)	G22:Methylation(C-term):1000.00	138.11	17	22200000	21	6	34	61723	insoluble protein [Pinctada fucata]
HavA	2204081	G.AGAGGGAGGGAGGGAGAGAG(+14.02).A	Y	37.01	1270.56	20	-3.1	636.288	2	26.79	3710000	2	5265	1	117	136	Methylation(C-term)	G20:Methylation(C-term):1000.00	138.11	17	22200000	21	6	34	61723	insoluble protein [Pinctada fucata]
HavA	2204081	L.GGGLGGLGGLGGLGGYGGS(-18.01)AAA.A	N	33.47	1656.82	22	-2.8	829.416	2	84.13	827000	1	18104	1	264	285	Dehydration	S19:Dehydration:22.69	138.11	17	22200000	21	6	34	61723	insoluble protein [Pinctada fucata]
HavA	2204081	G.GGGFR(sub G)GLGGLGGLGGGSAA.A	N	32.86	1516.77	19	1.4	759.396	2	77.31	1850000	1	16660	1	492	510			138.11	17	22200000	21	6	34	61723	insoluble protein [Pinctada fucata]
HavA	2204081	G.LGGLGGGLGGLGGLGGLGGYGGS(-18.01)AAA.A	N	32.31	1997.03	26	-3	999.521	2	100.5	2240000	1	21608	3	260	285	Dehydration	S23:Dehydration:29.32	138.11	17	22200000	21	6	34	61723	insoluble protein [Pinctada fucata]
HavA	2204081	G.GLGGLGGGLGGLGGLGGLGGYGGS(-18.01)AAA.A	N	31.73	2054.05	27	-2.3	1028.03	2	101.51	712000	1	21825	1	259	285	Dehydration	S24:Dehydration:26.52	138.11	17	22200000	21	6	34	61723	insoluble protein [Pinctada fucata]
HavA	2204081	G.AGAGGGAGGGAGGGAGAGAGAGAGAGAG(+17.03).A	Y	31.53	1785.81	28	0.5	893.913	2	41.19	1250000	2	8390	1	117	144	Replacement of proton with ammonium ion	G28:Replacement of proton with ammonium ion:1000.00	138.11	17	22200000	21	6	34	61723	insoluble protein [Pinctada fucata]
HavA	2204081	G.AGAGGGAGGGAGGGAGAGAG.A	Y	31.42	1256.55	20	-1.4	629.281	2	25.24	2970000	2	4926	1	117	136			138.11	17	22200000	21	6	34	61723	insoluble protein [Pinctada fucata]
HavA	2204081	M.RGGGS(+136.03)AAAAAAAAAAAAGGGWGGGMGG.G	N	31.28	2193.97	27	2.4	1098	2	102.19	0	2	21772	1	536	562	O-Diethylphosphorylation	S5:O-Diethylphosphorylation:1000.00	138.11	17	22200000	21	6	34	61723	insoluble protein [Pinctada fucata]
HavA	2204081	L.GGLGGGLGGLGGLGGLGGYGGS(-18.01)AAA.A	N	31.18	1883.95	25	-1.4	942.98	2	110.97	129000000	1	23892	7	261	285	Dehydration	S22:Dehydration:16.66	138.11	17	22200000	21	6	34	61723	insoluble protein [Pinctada fucata]
HavA	2204081	A.AAAAAAAAASGGGGR(+28.03).A	N	31.09	1156.59	15	-0.3	579.304	2	44.98	0	2	9221	1	511	525	Dimethylation(KR)	R15:Dimethylation(KR):1000.00	138.11	17	22200000	21	6	34	61723	insoluble protein [Pinctada fucata]
HavA	2204081	G.AGAGGGAGGGAGGGAGAGA.G	Y	31.07	1199.53	19	-0.1	600.771	2	24.94	9990000	2	4863	1	117	135			138.11	17	22200000	21	6	34	61723	insoluble protein [Pinctada fucata]
HavA	2204081	G.GAGGGAGGGAGAGAGAGAGAGAGAG.L	N	31.03	1583.7	25	1.1	792.86	2	35.86	673000	2	7223	1	122	146			138.11	17	22200000	21	6	34	61723	insoluble protein [Pinctada fucata]
HavA	2204081	L.GGGLGGLGGLGGLGGYGGSAAA(+21.98).A	N	30.24	1696.81	22	-2.1	849.413	2	86.73	964000	2	18315	1	264	285	Sodium adduct	A22:Sodium adduct:1000.00	138.11	17	22200000	21	6	34	61723	insoluble protein [Pinctada fucata]
HavA	2204081	G.GGR(sub G)FGGLGGLGGLGGGS.A	N	29.91	1374.7	17	0.5	688.358	2	77.97	2990000	1	16798	1	492	508			138.11	17	22200000	21	6	34	61723	insoluble protein [Pinctada fucata]
HavA	2204081	L.GGGLGGLGGLGGLGGY(-18.01)GGSAAA.A	N	29.89	1656.82	22	-3.2	829.416	2	87.44	1370000	2	18472	2	264	285	Dehydration	Y16:Dehydration:22.69	138.11	17	22200000	21	6	34	61723	insoluble protein [Pinctada fucata]
HavA	2204081	M.GAGAGGGAGGGAGGGAGAGAGAGAGAG(+17.03).A	Y	29.72	1714.77	27	-0.7	858.393	2	34.97	1960000	2	7028	1	116	142	Replacement of proton with ammonium ion	G27:Replacement of proton with ammonium ion:1000.00	138.11	17	22200000	21	6	34	61723	insoluble protein [Pinctada fucata]
HavA	2204081	G.AGGGAGGGAGAGAGAGAGA.G	N	29.59	1213.54	19	0.6	607.779	2	26.01	18600000	2	5093	1	123	141			138.11	17	22200000	21	6	34	61723	insoluble protein [Pinctada fucata]
HavA	2204081	G.AGAGGGAGGGAGGGAGAGAGAGAGAG(+17.03).A	Y	29.3	1657.75	26	-0.5	829.883	2	36.66	0	2	7392	1	117	142	Replacement of proton with ammonium ion	G26:Replacement of proton with ammonium ion:1000.00	138.11	17	22200000	21	6	34	61723	insoluble protein [Pinctada fucata]
HavA	2204081	G.FGGLGGLGGLGGGS(+14.02)AAA.A	N	28.76	1331.68	17	-0.2	666.849	2	91.54	2390000	1	19688	1	495	511	Methylation(others)	S14:Methylation(others):1000.00	138.11	17	22200000	21	6	34	61723	insoluble protein [Pinctada fucata]
HavA	2204081	L.GGLGGGLGGLGGGLGGLGGLGGLG(+123.01).G	N	28.41	1901.97	24	0.5	634.998	3	94.09	53600	1	20235	1	254	277	glycosylphosphatidylinositol	G24:glycosylphosphatidylinositol:1000.00	138.11	17	22200000	21	6	34	61723	insoluble protein [Pinctada fucata]
HavA	2204081	L.R(+44.03)RQMRGGGSAAAAAAAA.A	N	28.34	1615.83	17	-0.8	808.923	2	93.93	372000	1	20199	1	532	548	Ethanolation (KR)	R1:Ethanolation (KR):11.06	138.11	17	22200000	21	6	34	61723	insoluble protein [Pinctada fucata]
HavA	2204081	G.GAGGGAGGGAGAGAGAGAGAGAGAG(+17.03).L	N	27.68	1600.73	25	0.1	801.372	2	35.76	1110000	2	7200	1	122	146	Replacement of proton with ammonium ion	G25:Replacement of proton with ammonium ion:1000.00	138.11	17	22200000	21	6	34	61723	insoluble protein [Pinctada fucata]
HavA	2204081	L.R(+44.03)RQMRGGGSAAAAAA.A	N	27.16	1473.76	15	1.6	737.888	2	92.14	1920000	1	19816	1	532	546	Ethanolation (KR)	R1:Ethanolation (KR):8.14	138.11	17	22200000	21	6	34	61723	insoluble protein [Pinctada fucata]
HavA	1242807733	I.GGGIGGGLGGLGGLGGQ(-.98).G	Y	39.52	1281.68	17	0.6	641.847	2	80.7	5560000	1	17380	1	93	109	Amidation	Q17:Amidation:1000.00	128.52	59	243000000	17	17	25	11637	glycine-rich cell wall structural protein-like [CrassOstrea edulis virginica]
HavA	1242807733	G.LGGGLGGGLGGGLGGGLGGS(+380.15).G	Y	38.11	1848.91	20	-0.1	925.462	2	112.35	0	1	24186	1	56	75	Nucleophilic addition to cytopiloyne+H2O	S20:Nucleophilic addition to cytopiloyne+H2O:109.27	128.52	59	243000000	17	17	25	11637	glycine-rich cell wall structural protein-like [CrassOstrea edulis virginica]
HavA	1242807733	H.IGGGGLGGGLGGGLGGG(+14.02).L	Y	38.02	1225.64	17	1.1	613.829	2	85.31	3470000	1	18358	1	27	43	Methylation(C-term)	G17:Methylation(C-term):1000.00	128.52	59	243000000	17	17	25	11637	glycine-rich cell wall structural protein-like [CrassOstrea edulis virginica]
HavA	1242807733	I.GGGIGGGLGGLGGLGGQGG.I	Y	36.92	1396.71	19	-0.8	699.36	2	83.34	1860000	1	17938	2	93	111			128.52	59	243000000	17	17	25	11637	glycine-rich cell wall structural protein-like [CrassOstrea edulis virginica]
HavA	1242807733	G.GGLGGGLGGGLGGGLGGG(+14.02).L	Y	34.88	1282.66	18	-0.2	642.339	2	86.47	2290000	2	18258	1	30	47	Methylation(C-term)	G18:Methylation(C-term):1000.00	128.52	59	243000000	17	17	25	11637	glycine-rich cell wall structural protein-like [CrassOstrea edulis virginica]
HavA	1242807733	G.GLGGGLGGGLGGGLGGSGGSQWSK.S	Y	34.63	1971.98	24	1.2	986.997	2	91.4	5680	1	19658	1	59	82			128.52	59	243000000	17	17	25	11637	glycine-rich cell wall structural protein-like [CrassOstrea edulis virginica]
HavA	1242807733	H.IGGGGLGGGLGGGL.G	Y	33.99	1040.56	14	-0.8	521.288	2	87.5	3240000	1	18825	1	27	40			128.52	59	243000000	17	17	25	11637	glycine-rich cell wall structural protein-like [CrassOstrea edulis virginica]
HavA	1242807733	G.GLGGGLGGGLGGGLGGSGGSQWSK(-.98).S	Y	33.73	1970.99	24	-8.3	986.495	2	91.44	2790000	1	19667	1	59	82	Amidation	K24:Amidation:1000.00	128.52	59	243000000	17	17	25	11637	glycine-rich cell wall structural protein-like [CrassOstrea edulis virginica]
HavA	1242807733	G.GLGGGLGGGLGGGLGGSGGSQWSK(+68.06)S.W	Y	32.91	2127.07	25	0.3	1064.54	2	92.7	4340000	1	19938	2	59	83	Piperidination	K24:Piperidination:57.50	128.52	59	243000000	17	17	25	11637	glycine-rich cell wall structural protein-like [CrassOstrea edulis virginica]
HavA	1242807733	G.GLGGGLGGGLGGGLGGG(+14.02).L	Y	31.86	1225.64	17	1.5	613.829	2	86.14	7430000	2	18184	2	31	47	Methylation(C-term)	G17:Methylation(C-term):1000.00	128.52	59	243000000	17	17	25	11637	glycine-rich cell wall structural protein-like [CrassOstrea edulis virginica]
HavA	1242807733	G.GLGGGLGGGLGGGLGGSGGS(-2.02)Q.W	Y	30.9	1568.75	21	1.2	785.385	2	83.59	194000	1	17990	1	59	79	2-amino-3-oxo-butanoic_acid	S20:2-amino-3-oxo-butanoic_acid:0.00	128.52	59	243000000	17	17	25	11637	glycine-rich cell wall structural protein-like [CrassOstrea edulis virginica]
HavA	1242807733	H.IGGGGLGGGLGGGL(-.98).G	Y	30.17	1039.58	14	1.9	520.797	2	82.4	8570000	1	17738	1	27	40	Amidation	L14:Amidation:1000.00	128.52	59	243000000	17	17	25	11637	glycine-rich cell wall structural protein-like [CrassOstrea edulis virginica]
HavA	1242807733	I.GGGIGGGLGGLGGLGGQGG(+17.03).I	Y	29.87	1413.73	19	-0.4	707.873	2	83.31	2120000	1	17929	1	93	111	Replacement of proton with ammonium ion	G19:Replacement of proton with ammonium ion:1000.00	128.52	59	243000000	17	17	25	11637	glycine-rich cell wall structural protein-like [CrassOstrea edulis virginica]
HavA	1242807733	G.G(+127.06)GLGGGLGGGLGGGLGGGLGGGLGGSG.G	Y	29.66	2051.04	27	1.4	1026.53	2	101.56	1530000	1	21836	1	50	76	N-Succinimidyl-2-morpholine acetate	G1:N-Succinimidyl-2-morpholine acetate:1000.00	128.52	59	243000000	17	17	25	11637	glycine-rich cell wall structural protein-like [CrassOstrea edulis virginica]
HavA	1242807733	G.GLGGGLGGGLGGGLGGGLGGSGGSQ(+28.03).W	Y	29.65	1882.95	25	-2.5	942.48	2	95.6	0	2	20304	1	55	79	Ethylation	Q25:Ethylation:29.59	128.52	59	243000000	17	17	25	11637	glycine-rich cell wall structural protein-like [CrassOstrea edulis virginica]
HavA	1242807733	G.GGLGGGLGGGLGGGLGGGLGGSGGSQ(+29.02).W	Y	29.24	1940.96	26	4.8	971.489	2	94.23	506000	1	20265	1	54	79	Deamidation followed by esterification with ethanol	Q26:Deamidation followed by esterification with ethanol:1000.00	128.52	59	243000000	17	17	25	11637	glycine-rich cell wall structural protein-like [CrassOstrea edulis virginica]
HavA	1242807733	P.G(+71.04)DGHIGGGGLGGG.L	Y	28.87	1080.49	13	-1.2	541.254	2	22.47	177000000	2	4342	1	23	35	Propionamide (K X@N-term)	G1:Propionamide (K X@N-term):1000.00	128.52	59	243000000	17	17	25	11637	glycine-rich cell wall structural protein-like [CrassOstrea edulis virginica]
HavA	1242807733	H.IGGGGLGGGLGGGLG(-.98).G	Y	28.69	1096.6	15	1	549.307	2	81.41	3690000	1	17528	1	27	41	Amidation	G15:Amidation:1000.00	128.52	59	243000000	17	17	25	11637	glycine-rich cell wall structural protein-like [CrassOstrea edulis virginica]
HavA	1242807733	G.LGGGLGGGLGGGLGGGLGGSGGSQ(+29.02).W	Y	28.43	1826.91	24	2.7	914.466	2	92.24	3810000	1	19839	1	56	79	Deamidation followed by esterification with ethanol	Q24:Deamidation followed by esterification with ethanol:1000.00	128.52	59	243000000	17	17	25	11637	glycine-rich cell wall structural protein-like [CrassOstrea edulis virginica]
HavA	1242807733	G.GLGGGLGGGLGGGLG.G	Y	27.88	1097.58	15	3.4	549.801	2	85.67	9440000	2	18079	1	31	45			128.52	59	243000000	17	17	25	11637	glycine-rich cell wall structural protein-like [CrassOstrea edulis virginica]
HavA	1242807733	G.GLGGGLGGGLGGGLGGGLGGSGGSQ(+29.02).W	Y	27.39	1883.93	25	5.6	628.989	3	91.54	5860000	1	19687	1	55	79	Deamidation followed by esterification with ethanol	Q25:Deamidation followed by esterification with ethanol:1000.00	128.52	59	243000000	17	17	25	11637	glycine-rich cell wall structural protein-like [CrassOstrea edulis virginica]
HavA	1242807733	G.GLGGGLGGGLGGGLGGSGGS(-18.01)QWSK.S	Y	27.08	1953.97	24	-1.5	977.989	2	88.99	0	1	19143	1	59	82	Dehydration	S20:Dehydration:0.00	128.52	59	243000000	17	17	25	11637	glycine-rich cell wall structural protein-like [CrassOstrea edulis virginica]
HavA	476538091	G.QLTENGKTTC(+57.02)QGDSGGPLM(+6.01).C	Y	42.44	1998.9	19	1.8	667.307	3	23.21	11200000	2	4496	1	194	212	Carbamidomethylation; Replacement of proton by lithium	C10:Carbamidomethylation:1000.00;M19:Replacement of proton by lithium:182.75	117.36	8	153000000	9	9	14	27055	SP1-Sep-3 [Sepia latimanus]
HavA	476538091	A.GQLTENGKTTC(+57.02)QGDSGGPLM(+6.01).C	Y	41.39	2055.92	20	2.1	686.315	3	23.45	8960000	2	4548	1	193	212	Carbamidomethylation; Replacement of proton by lithium	C11:Carbamidomethylation:1000.00;M20:Replacement of proton by lithium:176.18	117.36	8	153000000	9	9	14	27055	SP1-Sep-3 [Sepia latimanus]
HavA	476538091	L.TENGK(+28.03)TTC(+57.02)QGDSGGPL.M	Y	40.69	1648.74	16	-4.1	825.372	2	54.45	8090000	2	11258	1	196	211	Dimethylation(KR); Carbamidomethylation	K5:Dimethylation(KR):1000.00;C8:Carbamidomethylation:1000.00	117.36	8	153000000	9	9	14	27055	SP1-Sep-3 [Sepia latimanus]
HavA	476538091	A.GQLTENGKTTCQGDSGGPL.M	Y	38.93	1861.85	19	-2.4	931.929	2	31.6	5140000	2	6302	1	193	211			117.36	8	153000000	9	9	14	27055	SP1-Sep-3 [Sepia latimanus]
HavA	476538091	Q.LTENGK(+71.04)TTC(+57.02)QGDSGGPL.M	Y	38.78	1804.83	17	-1.7	903.419	2	29.47	0	2	5841	1	195	211	Propionamide (K X@N-term); Carbamidomethylation	K6:Propionamide (K X@N-term):0.00;C9:Carbamidomethylation:1000.00	117.36	8	153000000	9	9	14	27055	SP1-Sep-3 [Sepia latimanus]
HavA	476538091	N.GK(+188.03)TTC(+57.02)QGDSGGPL.M	Y	36.42	1464.6	13	3.5	733.312	2	35.4	7720000	2	7122	1	199	211	Lipoyl; Carbamidomethylation	K2:Lipoyl:1000.00;C5:Carbamidomethylation:1000.00	117.36	8	153000000	9	9	14	27055	SP1-Sep-3 [Sepia latimanus]
HavA	476538091	E.NGK(+188.03)TTC(+57.02)QGDSGGPL.M	Y	35.39	1578.65	14	1.1	790.332	2	39.52	41400000	2	8024	2	198	211	Lipoyl; Carbamidomethylation	K3:Lipoyl:1000.00;C6:Carbamidomethylation:1000.00	117.36	8	153000000	9	9	14	27055	SP1-Sep-3 [Sepia latimanus]
HavA	476538091	L.TENGK(+14.96)TTC(+57.02)QGDSGGPL.M	Y	33.54	1635.67	16	1.9	818.843	2	54.37	883000	2	11242	1	196	211	Alpha-amino adipic acid; Carbamidomethylation	K5:Alpha-amino adipic acid:1000.00;C8:Carbamidomethylation:1000.00	117.36	8	153000000	9	9	14	27055	SP1-Sep-3 [Sepia latimanus]
HavA	476538091	T.T(+43.01)C(+57.02)QGDSGGPL.M	Y	32.75	1033.41	10	-0.9	517.714	2	50.69	4590000	2	10453	1	202	211	Carbamylation; Carbamidomethylation	T1:Carbamylation:1000.00;C2:Carbamidomethylation:1000.00	117.36	8	153000000	9	9	14	27055	SP1-Sep-3 [Sepia latimanus]
HavA	476538091	T.EN(+.98)GKTTC(+57.02)Q(+.98)GDSGGPL.M	Y	30.44	1521.63	15	0.6	761.82	2	38.9	59900000	2	7887	2	197	211	Deamidation (NQ); Carbamidomethylation	N2:Deamidation (NQ):1000.00;C7:Carbamidomethylation:1000.00;Q8:Deamidation (NQ):1000.00	117.36	8	153000000	9	9	14	27055	SP1-Sep-3 [Sepia latimanus]
HavA	476538091	T.ENGK(+15.99)TTC(+57.02)QGDSGGPL.M	Y	30.09	1535.65	15	-5.7	768.829	2	37.46	3170000	2	7566	1	197	211	Oxidation or Hydroxylation; Carbamidomethylation	K4:Oxidation or Hydroxylation:5.47;C7:Carbamidomethylation:1000.00	117.36	8	153000000	9	9	14	27055	SP1-Sep-3 [Sepia latimanus]
HavA	476538091	T.ENGK(+28.03)TTC(+57.02)QGDSGGPL.M	Y	27.2	1547.69	15	-4.7	774.848	2	54.79	1570000	2	11331	1	197	211	Dimethylation(KR); Carbamidomethylation	K4:Dimethylation(KR):1000.00;C7:Carbamidomethylation:1000.00	117.36	8	153000000	9	9	14	27055	SP1-Sep-3 [Sepia latimanus]
HavA	212169038	G.QLTENGKTTC(+57.02)QGDSGGPLM(+6.01).C	Y	42.44	1998.9	19	1.8	667.307	3	23.21	11200000	2	4496	1	30	48	Carbamidomethylation; Replacement of proton by lithium	C10:Carbamidomethylation:1000.00;M19:Replacement of proton by lithium:182.75	117.36	22	153000000	9	9	14	9654	S1 type peptidase partial [Sepia latimanus]
HavA	212169038	A.GQLTENGKTTC(+57.02)QGDSGGPLM(+6.01).C	Y	41.39	2055.92	20	2.1	686.315	3	23.45	8960000	2	4548	1	29	48	Carbamidomethylation; Replacement of proton by lithium	C11:Carbamidomethylation:1000.00;M20:Replacement of proton by lithium:176.18	117.36	22	153000000	9	9	14	9654	S1 type peptidase partial [Sepia latimanus]
HavA	212169038	L.TENGK(+28.03)TTC(+57.02)QGDSGGPL.M	Y	40.69	1648.74	16	-4.1	825.372	2	54.45	8090000	2	11258	1	32	47	Dimethylation(KR); Carbamidomethylation	K5:Dimethylation(KR):1000.00;C8:Carbamidomethylation:1000.00	117.36	22	153000000	9	9	14	9654	S1 type peptidase partial [Sepia latimanus]
HavA	212169038	A.GQLTENGKTTCQGDSGGPL.M	Y	38.93	1861.85	19	-2.4	931.929	2	31.6	5140000	2	6302	1	29	47			117.36	22	153000000	9	9	14	9654	S1 type peptidase partial [Sepia latimanus]
HavA	212169038	Q.LTENGK(+71.04)TTC(+57.02)QGDSGGPL.M	Y	38.78	1804.83	17	-1.7	903.419	2	29.47	0	2	5841	1	31	47	Propionamide (K X@N-term); Carbamidomethylation	K6:Propionamide (K X@N-term):0.00;C9:Carbamidomethylation:1000.00	117.36	22	153000000	9	9	14	9654	S1 type peptidase partial [Sepia latimanus]
HavA	212169038	N.GK(+188.03)TTC(+57.02)QGDSGGPL.M	Y	36.42	1464.6	13	3.5	733.312	2	35.4	7720000	2	7122	1	35	47	Lipoyl; Carbamidomethylation	K2:Lipoyl:1000.00;C5:Carbamidomethylation:1000.00	117.36	22	153000000	9	9	14	9654	S1 type peptidase partial [Sepia latimanus]
HavA	212169038	E.NGK(+188.03)TTC(+57.02)QGDSGGPL.M	Y	35.39	1578.65	14	1.1	790.332	2	39.52	41400000	2	8024	2	34	47	Lipoyl; Carbamidomethylation	K3:Lipoyl:1000.00;C6:Carbamidomethylation:1000.00	117.36	22	153000000	9	9	14	9654	S1 type peptidase partial [Sepia latimanus]
HavA	212169038	L.TENGK(+14.96)TTC(+57.02)QGDSGGPL.M	Y	33.54	1635.67	16	1.9	818.843	2	54.37	883000	2	11242	1	32	47	Alpha-amino adipic acid; Carbamidomethylation	K5:Alpha-amino adipic acid:1000.00;C8:Carbamidomethylation:1000.00	117.36	22	153000000	9	9	14	9654	S1 type peptidase partial [Sepia latimanus]
HavA	212169038	T.T(+43.01)C(+57.02)QGDSGGPL.M	Y	32.75	1033.41	10	-0.9	517.714	2	50.69	4590000	2	10453	1	38	47	Carbamylation; Carbamidomethylation	T1:Carbamylation:1000.00;C2:Carbamidomethylation:1000.00	117.36	22	153000000	9	9	14	9654	S1 type peptidase partial [Sepia latimanus]
HavA	212169038	T.EN(+.98)GKTTC(+57.02)Q(+.98)GDSGGPL.M	Y	30.44	1521.63	15	0.6	761.82	2	38.9	59900000	2	7887	2	33	47	Deamidation (NQ); Carbamidomethylation	N2:Deamidation (NQ):1000.00;C7:Carbamidomethylation:1000.00;Q8:Deamidation (NQ):1000.00	117.36	22	153000000	9	9	14	9654	S1 type peptidase partial [Sepia latimanus]
HavA	212169038	T.ENGK(+15.99)TTC(+57.02)QGDSGGPL.M	Y	30.09	1535.65	15	-5.7	768.829	2	37.46	3170000	2	7566	1	33	47	Oxidation or Hydroxylation; Carbamidomethylation	K4:Oxidation or Hydroxylation:5.47;C7:Carbamidomethylation:1000.00	117.36	22	153000000	9	9	14	9654	S1 type peptidase partial [Sepia latimanus]
HavA	212169038	T.ENGK(+28.03)TTC(+57.02)QGDSGGPL.M	Y	27.2	1547.69	15	-4.7	774.848	2	54.79	1570000	2	11331	1	33	47	Dimethylation(KR); Carbamidomethylation	K4:Dimethylation(KR):1000.00;C7:Carbamidomethylation:1000.00	117.36	22	153000000	9	9	14	9654	S1 type peptidase partial [Sepia latimanus]
HavA	1242807640	L.GGLGGLGGLGGGLGGKGGGGMGGK(+226.08)G.Y	Y	42.75	2110.04	25	1.4	1056.03	2	95.1	3620000	1	20453	2	122	146	Biotinylation	K24:Biotinylation:30.66	114.69	37	19200000	8	8	11	12167	glycine-rich protein 23-like [CrassOstrea edulis virginica]
HavA	1242807640	L.GGLGGLGGLGGGLGGKGGGGMGGK(+21.98).G	Y	40.98	1848.92	24	-2.2	925.467	2	91.33	8940000	1	19643	2	122	145	Sodium adduct	K24:Sodium adduct:1000.00	114.69	37	19200000	8	8	11	12167	glycine-rich protein 23-like [CrassOstrea edulis virginica]
HavA	1242807640	S.GLGGLGGLGGLGGGLGGK(+225.09)GGGGM.G	Y	36.76	1980	23	-0.1	991.009	2	97.94	503000	1	21061	1	120	142	Iminobiotinylation	K18:Iminobiotinylation:95.86	114.69	37	19200000	8	8	11	12167	glycine-rich protein 23-like [CrassOstrea edulis virginica]
HavA	1242807640	L.GGLGGLGGLGGGLGGKGGGGMGG(+14.02).K	Y	36	1712.86	23	-1.9	857.437	2	83.35	417000	1	17939	1	122	144	Methylation(C-term)	G23:Methylation(C-term):1000.00	114.69	37	19200000	8	8	11	12167	glycine-rich protein 23-like [CrassOstrea edulis virginica]
HavA	1242807640	S.G(+71.04)LGGLGGLGGLGGGLGGKGGGGMGGK.G	Y	33.57	2068.08	26	-8.1	1035.04	2	98.89	704000	1	21265	1	120	145	Propionamide (K X@N-term)	G1:Propionamide (K X@N-term):76.16	114.69	37	19200000	8	8	11	12167	glycine-rich protein 23-like [CrassOstrea edulis virginica]
HavA	1242807640	S.GLGGLGGLGGLGGGLGGKGGGGMGGK.G	Y	32.19	1997.05	26	-9.1	999.522	2	97.89	0	1	21050	1	120	145			114.69	37	19200000	8	8	11	12167	glycine-rich protein 23-like [CrassOstrea edulis virginica]
HavA	1242807640	L.GGLGGGLGGLGGGLGS(+58.03)GL.G	Y	29.95	1412.75	18	0.5	707.383	2	79.73	920000	1	17171	1	104	121	2 3-dihydro-2 2-dimethyl-7-benzofuranol N-methyl carbamate	S16:2 3-dihydro-2 2-dimethyl-7-benzofuranol N-methyl carbamate:1000.00	114.69	37	19200000	8	8	11	12167	glycine-rich protein 23-like [CrassOstrea edulis virginica]
HavA	1242807640	L.GGLGGLGGGLGGK(+42.01)GGGGMGGK(+14.02)G.Y	Y	27.12	1712.86	22	-6.4	857.433	2	80.73	867000	1	17386	1	125	146	Acetylation (K); Methylation(KR)	K13:Acetylation (K):16.15;K21:Methylation(KR):16.15	114.69	37	19200000	8	8	11	12167	glycine-rich protein 23-like [CrassOstrea edulis virginica]
HavA	1242807640	G.G(+27.99)VIMSGLGGLGG.L	Y	27.03	1044.53	12	-1.5	523.27	2	54.04	3220000	2	11173	1	69	80	Formylation	G1:Formylation:1000.00	114.69	37	19200000	8	8	11	12167	glycine-rich protein 23-like [CrassOstrea edulis virginica]
HavA	3513512	G.L(+71.04)GGLGGLGFGGAG.A	Y	35.62	1102.58	13	-1.6	552.295	2	94.52	1290000	1	20328	1	793	805	Propionamide (K X@N-term)	L1:Propionamide (K X@N-term):1000.00	112.53	7	5640000	10	8	10	77882	nongradient byssal precursor [Mytilus edulis]
HavA	3513512	L.GGLGGGLGGGGLGGGG(+14.02).L	N	32.15	1112.56	16	0.4	557.286	2	75.28	932000	1	16230	1	140	155	Methylation(C-term)	G16:Methylation(C-term):1000.00	112.53	7	5640000	10	8	10	77882	nongradient byssal precursor [Mytilus edulis]
HavA	3513512	G.GIGGGFGGLGGG.L	Y	31.13	904.44	12	-0.6	453.227	2	82.49	1350000	1	17756	1	768	779			112.53	7	5640000	10	8	10	77882	nongradient byssal precursor [Mytilus edulis]
HavA	3513512	G.V(+28.03)GGGLGGLGGGLGGGGL.G	Y	31.01	1281.7	17	0.3	641.86	2	94.68	697000	1	20362	1	135	151	Ethylation	V1:Ethylation:50.63	112.53	7	5640000	10	8	10	77882	nongradient byssal precursor [Mytilus edulis]
HavA	3513512	G.GLGGGGLGGGGLGGGL.G	Y	30.86	1154.6	16	2.7	578.311	2	85.32	0	1	18360	1	155	170			112.53	7	5640000	10	8	10	77882	nongradient byssal precursor [Mytilus edulis]
HavA	3513512	G.G(+71.04)LGGLGGLGFGGAG.A	Y	29.72	1159.6	14	-0.5	580.806	2	94.27	1700000	1	20273	1	792	805	Propionamide (K X@N-term)	G1:Propionamide (K X@N-term):1000.00	112.53	7	5640000	10	8	10	77882	nongradient byssal precursor [Mytilus edulis]
HavA	3513512	G.GLGGLGFGGA(-.98).G	Y	29.37	803.429	10	-0.6	402.721	2	79.27	0	1	17074	1	795	804	Amidation	A10:Amidation:1000.00	112.53	7	5640000	10	8	10	77882	nongradient byssal precursor [Mytilus edulis]
HavA	3513512	G.L(+71.04)GGLGGLGFGGA.G	Y	28.77	1045.56	12	-1.2	523.784	2	95.91	0	1	20630	1	793	804	Propionamide (K X@N-term)	L1:Propionamide (K X@N-term):1000.00	112.53	7	5640000	10	8	10	77882	nongradient byssal precursor [Mytilus edulis]
HavA	3513512	G.GGLGGGGLGGGLGG.L	N	28.56	984.499	14	-0.3	493.257	2	75.33	233000	1	16240	1	159	172			112.53	7	5640000	10	8	10	77882	nongradient byssal precursor [Mytilus edulis]
HavA	3513512	G.L(+87.03)GGLGGLGGLGFGGAG.A	Y	27.02	1345.7	16	1.7	673.858	2	99.32	606000	1	21355	1	790	805	Glycidamide adduct	L1:Glycidamide adduct:1000.00	112.53	7	5640000	10	8	10	77882	nongradient byssal precursor [Mytilus edulis]
HavA	365189155	A.A(+43.01)AAAGGGAGGGAGAGAGAGAG.A	Y	36.94	1398.62	21	-0.2	700.319	2	30.36	0	2	6038	1	490	510	Carbamylation	A1:Carbamylation:1000.00	110.93	10	6900000	6	5	6	56611	MSI60-related protein [Pinctada fucata]
HavA	365189155	A.A(+43.01)AAAGGGAGGGAGAGAG.A	Y	36.19	1142.51	17	1.5	572.261	2	24.09	0	2	4683	1	490	506	Carbamylation	A1:Carbamylation:1000.00	110.93	10	6900000	6	5	6	56611	MSI60-related protein [Pinctada fucata]
HavA	365189155	A.AGGGAGGGAGAGAGAGAGA.G	N	29.59	1213.54	19	0.6	607.779	2	26.01	18600000	2	5093	1	493	511			110.93	10	6900000	6	5	6	56611	MSI60-related protein [Pinctada fucata]
HavA	365189155	G.GSAAAAAAAAAAAAGGAGGRR(+144.04)GFRLG.G	Y	29.37	2300.17	26	1.6	1151.1	2	111.45	0	1	23997	1	447	472	Condensation product of 3-deoxyglucosone	R21:Condensation product of 3-deoxyglucosone:0.00	110.93	10	6900000	6	5	6	56611	MSI60-related protein [Pinctada fucata]
HavA	365189155	G.GGAGGGAGAGAGAGAGAGGAGGS(+162.05)A.A	Y	28.17	1704.73	24	5	853.376	2	36.16	978000	2	7286	1	495	518	Hexose (NSY)	S23:Hexose (NSY):1000.00	110.93	10	6900000	6	5	6	56611	MSI60-related protein [Pinctada fucata]
HavA	365189155	G.G(+43.01)RGGAGGAGGSSAAAA.A	Y	28.05	1216.55	16	1.1	609.285	2	25.06	5920000	2	4888	1	384	399	Carbamylation	G1:Carbamylation:1000.00	110.93	10	6900000	6	5	6	56611	MSI60-related protein [Pinctada fucata]
HavA	372558280	S.A(+43.01)GAGAAGGAGGAGGAGGA.G	Y	40.65	1199.53	18	0	600.771	2	24.32	0	2	4731	1	620	637	Carbamylation	A1:Carbamylation:1000.00	110.65	5	6800000	4	4	4	85100	insoluble matrix protein [Pinctada fucata]
HavA	372558280	G.A(+43.01)GAAGGAGGAGGAGGAGGSASAAA.A	Y	35.08	1643.72	24	6.4	822.875	2	33.25	3420000	2	6655	1	622	645	Carbamylation	A1:Carbamylation:1000.00	110.65	5	6800000	4	4	4	85100	insoluble matrix protein [Pinctada fucata]
HavA	372558280	A.GAGAAGGAGGAGGAGGAGGSASAAA.A	Y	31.38	1657.74	25	3.3	829.88	2	36.03	1980000	2	7259	1	621	645			110.65	5	6800000	4	4	4	85100	insoluble matrix protein [Pinctada fucata]
HavA	372558280	Y.C(+42.01)TVIISVGAGASAAAAAAAAAAGAAGA.G	Y	30.87	2156.09	27	7	1079.06	2	91.12	1400000	1	19598	1	59	85	Acetylation (N-term)	C1:Acetylation (N-term):1000.00	110.65	5	6800000	4	4	4	85100	insoluble matrix protein [Pinctada fucata]
HavA	918339035	G.IGGGGIGGGIGGGGIGGGGS(+42.01)G.G	Y	40.52	1511.73	21	-0.1	756.874	2	85.45	1180000	1	18386	1	77	97	Acetylation (TSCYH)	S20:Acetylation (TSCYH):1000.00	103.77	15	7780000	6	4	8	16482	hypothetical protein OCBIM_22008720mg partial [Octopus bimaculoides]
HavA	918339035	G.IGGGGIGGGIGGGGIGGGGS(+42.01)GG.G	Y	36.93	1568.75	22	-0.7	785.384	2	84.34	0	2	17775	1	77	98	Acetylation (TSCYH)	S20:Acetylation (TSCYH):1000.00	103.77	15	7780000	6	4	8	16482	hypothetical protein OCBIM_22008720mg partial [Octopus bimaculoides]
HavA	918339035	G.GGIGGGIGGGGIGGGG(+14.02).S	N	31.8	1112.56	16	0.4	557.286	2	75.28	932000	1	16230	1	80	95	Methylation(C-term)	G16:Methylation(C-term):1000.00	103.77	15	7780000	6	4	8	16482	hypothetical protein OCBIM_22008720mg partial [Octopus bimaculoides]
HavA	918339035	G.GIGGGGIGGGIGGGGIGGGGSGGG(-.98).D	Y	31.49	1639.8	24	-2.1	820.907	2	86.15	0	2	18187	1	76	99	Amidation	G24:Amidation:1000.00	103.77	15	7780000	6	4	8	16482	hypothetical protein OCBIM_22008720mg partial [Octopus bimaculoides]
HavA	918339035	G.GGIGGGGIGGGIGGGGIGGGGSGGG(-.98).D	Y	30.71	1696.82	25	-1.3	849.418	2	88.08	5680000	1	18949	2	75	99	Amidation	G25:Amidation:1000.00	103.77	15	7780000	6	4	8	16482	hypothetical protein OCBIM_22008720mg partial [Octopus bimaculoides]
HavA	918339035	G.IGGGGIGGGIGGGGIGGGGS(-15.99)GG.G	Y	30.66	1510.75	22	2.4	756.384	2	80.71	925000	1	17381	1	77	98	Deoxy	S20:Deoxy:1000.00	103.77	15	7780000	6	4	8	16482	hypothetical protein OCBIM_22008720mg partial [Octopus bimaculoides]
HavA	918339035	G.GGIGGGGIGGGIGG.G	N	28.95	984.499	14	-0.3	493.257	2	75.33	233000	1	16240	1	75	88			103.77	15	7780000	6	4	8	16482	hypothetical protein OCBIM_22008720mg partial [Octopus bimaculoides]
HavA	961112486	A.SAAAAAAAAAAAAAVN(+17.03).S	Y	38.39	1258.66	16	-1.3	630.338	2	85.52	0	2	18045	1	71	86	Replacement of proton with ammonium ion	N16:Replacement of proton with ammonium ion:1000.00	91.79	5	4350000	5	5	5	50951	PREDICTED: transcription factor hamlet-like partial [Octopus bimaculoides]
HavA	961112486	A.SAAAAAAAAAAAAAV(-.98).N	Y	38.24	1126.61	15	0.2	564.312	2	82.7	1030000	1	17800	1	71	85	Amidation	V15:Amidation:1000.00	91.79	5	4350000	5	5	5	50951	PREDICTED: transcription factor hamlet-like partial [Octopus bimaculoides]
HavA	961112486	A.AAAAAAAAVN(+.98)SAVGA.R	Y	33.32	1185.6	15	-0.7	593.806	2	47.26	0	2	9721	1	77	91	Deamidation (NQ)	N10:Deamidation (NQ):1000.00	91.79	5	4350000	5	5	5	50951	PREDICTED: transcription factor hamlet-like partial [Octopus bimaculoides]
HavA	961112486	A.AAAAAAAAAAAVN(+.98)SAVGA.R	Y	31.39	1398.71	18	1.1	700.363	2	63.81	1180000	2	13254	1	74	91	Deamidation (NQ)	N13:Deamidation (NQ):1000.00	91.79	5	4350000	5	5	5	50951	PREDICTED: transcription factor hamlet-like partial [Octopus bimaculoides]
HavA	961112486	A.AAAAAAAAAAAAVNSAVGAR(-43.05)T.G	Y	27.96	1682.86	21	0.1	842.437	2	89.68	2140000	2	18978	1	73	93	Arginine oxidation to glutamic semialdehyde	R20:Arginine oxidation to glutamic semialdehyde:1000.00	91.79	5	4350000	5	5	5	50951	PREDICTED: transcription factor hamlet-like partial [Octopus bimaculoides]
HavB	1176704634	A.AAAAEVVDEFGIGALAGA(+28.03).G	Y	54.19	1658.85	18	8.3	830.44	2	90.61	16300000	2	19746	9	91	108	Ethylation	A18:Ethylation:31.90	258.42	39	2310000000	158	153	405	73702	Hic74 [Hyriopsis cumingii]
HavB	1176704634	A.AAAEVVDEFGIGALAGA(+28.03).G	Y	54.04	1587.81	17	7.1	794.92	2	88.5	15400000	2	19283	7	92	108	Ethylation	A17:Ethylation:84.02	258.42	39	2310000000	158	153	405	73702	Hic74 [Hyriopsis cumingii]
HavB	1176704634	A.AAAAAEVVDEFGIGALAGA(+28.03).G	Y	49.12	1729.89	19	6.4	577.64	3	94.2	7100000	1	19864	13	90	108	Ethylation	A19:Ethylation:85.31	258.42	39	2310000000	158	153	405	73702	Hic74 [Hyriopsis cumingii]
HavB	1176704634	A.AAEVVDEFGIGALAGA(+28.03).G	Y	48.68	1516.78	16	6.4	759.401	2	88.82	23000000	1	18688	6	93	108	Ethylation	A16:Ethylation:99.51	258.42	39	2310000000	158	153	405	73702	Hic74 [Hyriopsis cumingii]
HavB	1176704634	A.AAAAAAAAEVVDEFGIGALAGA(+28.03).G	Y	48.13	1943	22	4.4	648.677	3	100.84	1130000	1	21330	4	87	108	Ethylation	A22:Ethylation:66.16	258.42	39	2310000000	158	153	405	73702	Hic74 [Hyriopsis cumingii]
HavB	1176704634	I.DC(+57.02)EEDDN(+.98)GKYYKRVV.K	Y	47.57	1889.81	15	-1	945.911	2	56.01	82400000	1	11667	7	834	848	Carbamidomethylation; Deamidation (NQ)	C2:Carbamidomethylation:1000.00;N7:Deamidation (NQ):1000.00	258.42	39	2310000000	158	153	405	73702	Hic74 [Hyriopsis cumingii]
HavB	1176704634	K.KIDC(+57.02)EEDDN(+.98)GKYYK.R	Y	47.37	1776.75	14	-1.1	593.257	3	38.81	20100000	1	7935	5	832	845	Carbamidomethylation; Deamidation (NQ)	C4:Carbamidomethylation:1000.00;N9:Deamidation (NQ):1000.00	258.42	39	2310000000	158	153	405	73702	Hic74 [Hyriopsis cumingii]
HavB	1176704634	A.SVLGDVD(-18.01)GLGGL.S	Y	47.26	1082.56	12	2.5	1083.57	1	102.96	446000	1	21796	1	124	135	Dehydration	D7:Dehydration:11.99	258.42	39	2310000000	158	153	405	73702	Hic74 [Hyriopsis cumingii]
HavB	1176704634	A.AEVVDEFGIGALAGA(+28.03).G	Y	46.98	1445.74	15	8.3	723.883	2	87.91	4180000	1	18491	2	94	108	Ethylation	A15:Ethylation:106.84	258.42	39	2310000000	158	153	405	73702	Hic74 [Hyriopsis cumingii]
HavB	1176704634	A.AAAAAAAEVVDEFGIGALAGA(+28.03).G	Y	46.11	1871.96	21	7.7	625	3	98.03	1630000	1	20711	3	88	108	Ethylation	A21:Ethylation:66.16	258.42	39	2310000000	158	153	405	73702	Hic74 [Hyriopsis cumingii]
HavB	1176704634	A.SVLGDVDGLGGLSALGL.G	Y	45.99	1541.83	17	-2.5	771.92	2	112.02	2530000	1	23791	1	124	140			258.42	39	2310000000	158	153	405	73702	Hic74 [Hyriopsis cumingii]
HavB	1176704634	V.Q(-17.03)EEIWKKI.D	Y	45.81	1055.57	8	0.3	528.79	2	77.98	16400000	1	16349	1	826	833	Pyro-glu from Q	Q1:Pyro-glu from Q:1000.00	258.42	39	2310000000	158	153	405	73702	Hic74 [Hyriopsis cumingii]
HavB	1176704634	I.D(+31.97)C(+57.02)EEDDNGKYYKRVV.K	Y	45.8	1920.8	15	0.3	641.274	3	53.99	9420000	1	11237	1	834	848	Persulfide; Carbamidomethylation	D1:Persulfide:71.51;C2:Carbamidomethylation:1000.00	258.42	39	2310000000	158	153	405	73702	Hic74 [Hyriopsis cumingii]
HavB	1176704634	G.G(+71.04)VGGGGLDLDTDTLL.A	Y	45.3	1472.74	15	0.4	737.375	2	104.54	640000	1	22143	2	288	302	Propionamide (K X@N-term)	G1:Propionamide (K X@N-term):1000.00	258.42	39	2310000000	158	153	405	73702	Hic74 [Hyriopsis cumingii]
HavB	1176704634	A.AAAGGDGDALAASAAR(+15.99).R	Y	45.26	1359.64	16	1.2	680.827	2	47.56	4250000	1	9865	3	730	745	Oxidation or Hydroxylation	R16:Oxidation or Hydroxylation:69.05	258.42	39	2310000000	158	153	405	73702	Hic74 [Hyriopsis cumingii]
HavB	1176704634	A.SVLGDVDGLGGLSALGLGG.G	Y	45.09	1655.87	19	1	828.945	2	111.95	1750000	1	23778	1	124	142			258.42	39	2310000000	158	153	405	73702	Hic74 [Hyriopsis cumingii]
HavB	1176704634	G.G(+71.04)VGGGGLDLDTDTLLA.L	Y	44.15	1543.77	16	0.1	772.894	2	103.3	249000	1	21871	2	288	303	Propionamide (K X@N-term)	G1:Propionamide (K X@N-term):1000.00	258.42	39	2310000000	158	153	405	73702	Hic74 [Hyriopsis cumingii]
HavB	1176704634	G.SGGSGGSGGSGGSGQRDKVQEE(+14.02).I	Y	43.77	1992.87	22	-7.3	997.437	2	51.05	0	1	10608	1	807	828	Methylation(others)	E22:Methylation(others):0.00	258.42	39	2310000000	158	153	405	73702	Hic74 [Hyriopsis cumingii]
HavB	1176704634	K.KID(+31.97)C(+57.02)EEDDNGK.Y	Y	43.71	1353.52	11	-0.4	677.766	2	20.75	4480000	1	3975	1	832	842	Persulfide; Carbamidomethylation	D3:Persulfide:20.26;C4:Carbamidomethylation:1000.00	258.42	39	2310000000	158	153	405	73702	Hic74 [Hyriopsis cumingii]
HavB	1176704634	A.SVLGDVDGLGGL.S	Y	43.68	1100.57	12	0	551.293	2	97.32	78400000	2	21229	18	124	135			258.42	39	2310000000	158	153	405	73702	Hic74 [Hyriopsis cumingii]
HavB	1176704634	A.SVLGDVDGLGGLSALGLG(+17.03).G	Y	43.61	1615.88	18	0.2	808.947	2	111.93	3340000	1	23774	1	124	141	Replacement of proton with ammonium ion	G18:Replacement of proton with ammonium ion:47.41	258.42	39	2310000000	158	153	405	73702	Hic74 [Hyriopsis cumingii]
HavB	1176704634	G.S(+43.01)EGGDGGAGFGGGAGA.G	Y	43.41	1265.49	16	-2.1	633.751	2	58.37	2030000	1	12165	1	213	228	Carbamylation	S1:Carbamylation:1000.00	258.42	39	2310000000	158	153	405	73702	Hic74 [Hyriopsis cumingii]
HavB	1176704634	A.SVLGDVDGLGGLSALGLGG(+17.03).G	Y	43.3	1672.9	19	2.2	837.459	2	111.94	2260000	1	23776	1	124	142	Replacement of proton with ammonium ion	G19:Replacement of proton with ammonium ion:47.66	258.42	39	2310000000	158	153	405	73702	Hic74 [Hyriopsis cumingii]
HavB	1176704634	A.SVLGDVDGLGGLSAL(+17.03).G	Y	43.02	1388.75	15	0.9	695.383	2	109.34	1120000	1	23202	1	124	138	Replacement of proton with ammonium ion	L15:Replacement of proton with ammonium ion:47.16	258.42	39	2310000000	158	153	405	73702	Hic74 [Hyriopsis cumingii]
HavB	1176704634	A.AAGGDGDALAASAAR(+15.99).R	Y	42.87	1288.6	15	-0.5	645.307	2	44.34	5580000	1	9157	3	731	745	Oxidation or Hydroxylation	R15:Oxidation or Hydroxylation:50.70	258.42	39	2310000000	158	153	405	73702	Hic74 [Hyriopsis cumingii]
HavB	1176704634	A.SVLGDVDGLGGLSALGLG.G	Y	42.47	1598.85	18	-2.6	800.431	2	112.02	2640000	1	23792	1	124	141			258.42	39	2310000000	158	153	405	73702	Hic74 [Hyriopsis cumingii]
HavB	1176704634	K.IDC(+57.02)EEDDN(+.98)GKYYK.R	Y	42.33	1648.66	13	-0.9	825.335	2	48.38	133000000	1	10040	10	833	845	Carbamidomethylation; Deamidation (NQ)	C3:Carbamidomethylation:1000.00;N8:Deamidation (NQ):1000.00	258.42	39	2310000000	158	153	405	73702	Hic74 [Hyriopsis cumingii]
HavB	1176704634	I.D(+31.97)C(+57.02)EEDDNGKYY.K	Y	42.31	1438.47	11	0.2	720.24	2	56.77	2280000	1	11826	1	834	844	Persulfide; Carbamidomethylation	D1:Persulfide:63.97;C2:Carbamidomethylation:1000.00	258.42	39	2310000000	158	153	405	73702	Hic74 [Hyriopsis cumingii]
HavB	1176704634	K.KIDC(+57.02)EEDDN(+.98)GK.Y	Y	41.85	1322.53	11	0.7	662.273	2	18.39	4210000	1	3465	4	832	842	Carbamidomethylation; Deamidation (NQ)	C4:Carbamidomethylation:1000.00;N9:Deamidation (NQ):1000.00	258.42	39	2310000000	158	153	405	73702	Hic74 [Hyriopsis cumingii]
HavB	1176704634	K.VQEEIW(+31.99)KK.I	Y	41.41	1090.57	8	0.1	546.29	2	26.17	131000000	1	5158	4	825	832	Dihydroxy	W6:Dihydroxy:27.96	258.42	39	2310000000	158	153	405	73702	Hic74 [Hyriopsis cumingii]
HavB	1176704634	A.SVLGDVDGLGGLSALG(+17.03).L	Y	41.28	1445.77	16	0.4	723.894	2	107.64	871000	1	22826	2	124	139	Replacement of proton with ammonium ion	G16:Replacement of proton with ammonium ion:51.66	258.42	39	2310000000	158	153	405	73702	Hic74 [Hyriopsis cumingii]
HavB	1176704634	I.D(+31.97)C(+57.02)EEDDNGKYYKRV.V	Y	41.15	1821.73	14	0	608.25	3	45.35	2630000	1	9377	1	834	847	Persulfide; Carbamidomethylation	D1:Persulfide:61.69;C2:Carbamidomethylation:1000.00	258.42	39	2310000000	158	153	405	73702	Hic74 [Hyriopsis cumingii]
HavB	1176704634	G.V(+71.04)GGGGLDLDTDTL.L	Y	40.67	1302.63	13	0.9	652.323	2	94.35	3280000	1	19899	2	289	301	Propionamide (K X@N-term)	V1:Propionamide (K X@N-term):1000.00	258.42	39	2310000000	158	153	405	73702	Hic74 [Hyriopsis cumingii]
HavB	1176704634	A.G(+87.03)GSGGSGGSGGSGGSGQRDK.V	Y	40.58	1694.72	20	-8.1	848.361	2	17.94	1190000	1	3364	1	805	824	Glycidamide adduct	G1:Glycidamide adduct:169.65	258.42	39	2310000000	158	153	405	73702	Hic74 [Hyriopsis cumingii]
HavB	1176704634	A.AAAAEVVDEFGIGAL.A	Y	40.57	1431.72	15	-0.8	716.869	2	105.76	535000	1	22411	1	91	105			258.42	39	2310000000	158	153	405	73702	Hic74 [Hyriopsis cumingii]
HavB	1176704634	A.AAAAGGDGDALAASAAR(+15.99).R	Y	40.56	1430.67	17	-0.4	716.344	2	49.66	4980000	1	10315	2	729	745	Oxidation or Hydroxylation	R17:Oxidation or Hydroxylation:50.70	258.42	39	2310000000	158	153	405	73702	Hic74 [Hyriopsis cumingii]
HavB	1176704634	G.L(+71.04)GGVGGGGLDLDTDTL.L	Y	40.51	1529.76	16	-0.4	765.886	2	102.99	10600000	1	21803	5	286	301	Propionamide (K X@N-term)	L1:Propionamide (K X@N-term):1000.00	258.42	39	2310000000	158	153	405	73702	Hic74 [Hyriopsis cumingii]
HavB	1176704634	G.G(+71.04)VGGGGLDLDTDTL.L	Y	40.43	1359.65	14	-0.9	680.832	2	94.24	9220000	1	19874	4	288	301	Propionamide (K X@N-term)	G1:Propionamide (K X@N-term):1000.00	258.42	39	2310000000	158	153	405	73702	Hic74 [Hyriopsis cumingii]
HavB	1176704634	A.SVLGDVDGLGGLS.A	Y	40.13	1187.6	13	-0.4	594.809	2	92.97	22600000	2	20268	8	124	136			258.42	39	2310000000	158	153	405	73702	Hic74 [Hyriopsis cumingii]
HavB	1176704634	A.ALGLGGVGGGGLD(+14.02)LDTDTL.L	Y	40.04	1713.88	19	-1.2	857.946	2	108.71	3730000	1	23062	2	283	301	Methylation(others)	D13:Methylation(others):22.85	258.42	39	2310000000	158	153	405	73702	Hic74 [Hyriopsis cumingii]
HavB	1176704634	A.SVLGDVDGLGGLSALGL(+17.03).G	Y	39.91	1558.86	17	-2.5	780.434	2	112.01	3360000	1	23789	2	124	140	Replacement of proton with ammonium ion	L17:Replacement of proton with ammonium ion:61.20	258.42	39	2310000000	158	153	405	73702	Hic74 [Hyriopsis cumingii]
HavB	1176704634	A.LGLASVLGDVDGLGGL.S	Y	39.84	1454.8	16	-0.8	728.406	2	112.03	0	1	23795	1	120	135			258.42	39	2310000000	158	153	405	73702	Hic74 [Hyriopsis cumingii]
HavB	1176704634	A.AAAAAAAAAEVVDEFGIGALAGA(+28.03).G	Y	39.44	2014.04	23	7.6	672.358	3	103.5	0	1	21914	2	86	108	Ethylation	A23:Ethylation:43.52	258.42	39	2310000000	158	153	405	73702	Hic74 [Hyriopsis cumingii]
HavB	1176704634	A.SVLGDVD(+21.98)GLGGL.S	Y	39.26	1122.55	12	0.1	562.284	2	100.35	1300000	1	21222	2	124	135	Sodium adduct	D7:Sodium adduct:18.53	258.42	39	2310000000	158	153	405	73702	Hic74 [Hyriopsis cumingii]
HavB	1176704634	A.SVLGDVDGLGGLSAL(-.98).G	Y	38.68	1370.74	15	2.7	686.379	2	106.35	344000	1	22543	3	124	138	Amidation	L15:Amidation:1000.00	258.42	39	2310000000	158	153	405	73702	Hic74 [Hyriopsis cumingii]
HavB	1176704634	R.AAAAAAAAAAAAAIR.N	Y	38.6	1210.68	15	0.4	606.347	2	69.11	21500000	2	15044	3	748	762			258.42	39	2310000000	158	153	405	73702	Hic74 [Hyriopsis cumingii]
HavB	1176704634	S.RFEQYVP(+31.99)GH.G	Y	38.41	1163.54	9	0.1	582.775	2	52.32	18200000	1	10879	1	30	38	Dihydroxy	P7:Dihydroxy:60.92	258.42	39	2310000000	158	153	405	73702	Hic74 [Hyriopsis cumingii]
HavB	1176704634	K.KIDC(+57.02)EEDDNGK.Y	Y	38.35	1321.55	11	0	661.78	2	17.66	3650000	1	3304	2	832	842	Carbamidomethylation	C4:Carbamidomethylation:1000.00	258.42	39	2310000000	158	153	405	73702	Hic74 [Hyriopsis cumingii]
HavB	1176704634	G.V(+71.04)GGGGLDLDTDTLLA.L	Y	37.87	1486.75	15	2.9	744.385	2	103.78	130000	1	21975	2	289	303	Propionamide (K X@N-term)	V1:Propionamide (K X@N-term):1000.00	258.42	39	2310000000	158	153	405	73702	Hic74 [Hyriopsis cumingii]
HavB	1176704634	A.SVLGDVDGLGGLSAL.G	Y	37.51	1371.72	15	1	686.87	2	109.59	1220000	1	23258	4	124	138			258.42	39	2310000000	158	153	405	73702	Hic74 [Hyriopsis cumingii]
HavB	1176704634	I.DC(+57.02)EEDDN(+.98)GKYY.K	Y	37.42	1407.48	11	-0.5	704.745	2	56.71	10600000	1	11814	2	834	844	Carbamidomethylation; Deamidation (NQ)	C2:Carbamidomethylation:1000.00;N7:Deamidation (NQ):1000.00	258.42	39	2310000000	158	153	405	73702	Hic74 [Hyriopsis cumingii]
HavB	1176704634	A.AEVVDEFGIGA.L	Y	37.36	1105.53	11	0.3	553.772	2	88.48	5530000	2	19277	4	94	104			258.42	39	2310000000	158	153	405	73702	Hic74 [Hyriopsis cumingii]
HavB	1176704634	A.AAAAAEVVDEFGIGAL.A	Y	37.3	1502.76	16	-3.3	752.386	2	107.4	0	1	22774	1	90	105			258.42	39	2310000000	158	153	405	73702	Hic74 [Hyriopsis cumingii]
HavB	1176704634	A.AAAAAGGDGDALAASAAR(+15.99).R	Y	37.04	1501.71	18	-2.1	751.862	2	51.51	0	1	10707	1	728	745	Oxidation or Hydroxylation	R18:Oxidation or Hydroxylation:46.32	258.42	39	2310000000	158	153	405	73702	Hic74 [Hyriopsis cumingii]
HavB	1176704634	K.VQEEIW(+15.99)K.K	Y	36.97	946.476	7	-0.5	474.245	2	54.49	68600000	1	11343	2	825	831	Oxidation (HW)	W6:Oxidation (HW):1000.00	258.42	39	2310000000	158	153	405	73702	Hic74 [Hyriopsis cumingii]
HavB	1176704634	I.DC(+57.02)EEDDN(+.98)GKYYKRV.V	Y	36.83	1790.74	14	-1.2	896.377	2	47.05	26600000	1	9752	4	834	847	Carbamidomethylation; Deamidation (NQ)	C2:Carbamidomethylation:1000.00;N7:Deamidation (NQ):1000.00	258.42	39	2310000000	158	153	405	73702	Hic74 [Hyriopsis cumingii]
HavB	1176704634	A.AAAEVVDEFGIGAL.A	Y	36.74	1360.69	14	3.2	681.353	2	104.06	149000	1	22038	1	92	105			258.42	39	2310000000	158	153	405	73702	Hic74 [Hyriopsis cumingii]
HavB	1176704634	S.GGSGGSGGSGQG(sub R)DKVQEEI.W	Y	36.64	1704.76	19	-1.7	853.383	2	50.82	1280000	1	10561	1	811	829			258.42	39	2310000000	158	153	405	73702	Hic74 [Hyriopsis cumingii]
HavB	1176704634	A.AAAEVVDEFGIGA.L	Y	36.59	1247.6	13	0.9	624.809	2	92.14	3290000	1	19414	3	92	104			258.42	39	2310000000	158	153	405	73702	Hic74 [Hyriopsis cumingii]
HavB	1176704634	A.AAAAAAGGDGDALAASAAR(+15.99).R	Y	36	1572.75	19	-3.3	787.379	2	53.28	4990000	1	11086	2	727	745	Oxidation or Hydroxylation	R19:Oxidation or Hydroxylation:50.70	258.42	39	2310000000	158	153	405	73702	Hic74 [Hyriopsis cumingii]
HavB	1176704634	A.SVLGDVDGLGGLS(+17.03).A	Y	35.97	1204.63	13	0.6	603.323	2	96.84	18400000	1	20448	3	124	136	Replacement of proton with ammonium ion	S13:Replacement of proton with ammonium ion:21.46	258.42	39	2310000000	158	153	405	73702	Hic74 [Hyriopsis cumingii]
HavB	1176704634	Q.E(-18.01)EIWKKI.D	Y	35.95	926.523	7	-0.4	464.268	2	74.2	273000	1	15549	1	827	833	Pyro-glu from E	E1:Pyro-glu from E:1000.00	258.42	39	2310000000	158	153	405	73702	Hic74 [Hyriopsis cumingii]
HavB	1176704634	G.SGGSGGSGQ(+.98)G(sub R)DKVQEEIWK.K	Y	35.72	1905.87	19	1.5	953.944	2	59.57	2170000	1	12422	1	813	831	Deamidation (NQ)	Q9:Deamidation (NQ):115.97	258.42	39	2310000000	158	153	405	73702	Hic74 [Hyriopsis cumingii]
HavB	1176704634	G.L(+71.04)GGVGGGGLDLDTDTLLA.L	Y	35.5	1713.88	18	2.5	857.949	2	109.72	250000	1	23286	1	286	303	Propionamide (K X@N-term)	L1:Propionamide (K X@N-term):1000.00	258.42	39	2310000000	158	153	405	73702	Hic74 [Hyriopsis cumingii]
HavB	1176704634	G.GSGGSGGSGGSGGSGQ(+.98)RDK.V	Y	35.48	1551.65	19	-8	776.827	2	18.99	1340000	1	3596	1	806	824	Deamidation (NQ)	Q16:Deamidation (NQ):1000.00	258.42	39	2310000000	158	153	405	73702	Hic74 [Hyriopsis cumingii]
HavB	1176704634	K.VQEEIW(+31.99)K.K	Y	35.44	962.471	7	-1	482.242	2	37.28	55000000	1	7595	2	825	831	Dihydroxy	W6:Dihydroxy:17.01	258.42	39	2310000000	158	153	405	73702	Hic74 [Hyriopsis cumingii]
HavB	1176704634	K.VQEEIWK(+27.99)K.I	Y	35.4	1086.57	8	0.9	544.293	2	61.73	2190000	1	12885	1	825	832	Formylation	K7:Formylation:21.94	258.42	39	2310000000	158	153	405	73702	Hic74 [Hyriopsis cumingii]
HavB	1176704634	A.AAEVVDEFGIGA.L	Y	35.37	1176.57	12	0.8	589.291	2	89.15	5880000	2	19425	3	93	104			258.42	39	2310000000	158	153	405	73702	Hic74 [Hyriopsis cumingii]
HavB	1176704634	A.SVLGDVD(+21.98)GLGGLS.A	Y	35.22	1209.59	13	-2.4	605.798	2	94.96	414000	1	20032	2	124	136	Sodium adduct	D7:Sodium adduct:19.18	258.42	39	2310000000	158	153	405	73702	Hic74 [Hyriopsis cumingii]
HavB	1176704634	G.SGGSGGSGQG(sub R)DKVQEEI.W	Y	35.2	1590.71	17	3.3	796.366	2	50.64	7990000	1	10524	1	813	829			258.42	39	2310000000	158	153	405	73702	Hic74 [Hyriopsis cumingii]
HavB	1176704634	R.VPILGASAAASAAA.S	Y	35.12	1168.65	14	-1.1	585.329	2	79.67	296000	1	16706	1	62	75			258.42	39	2310000000	158	153	405	73702	Hic74 [Hyriopsis cumingii]
HavB	1176704634	R.DKVQEEIW(+3.99)K.K	Y	35.01	1177.6	9	3	589.808	2	56.77	1480000	1	11828	1	823	831	Tryptophan oxidation to kynurenin	W8:Tryptophan oxidation to kynurenin:1000.00	258.42	39	2310000000	158	153	405	73702	Hic74 [Hyriopsis cumingii]
HavB	1176704634	K.KIDC(+57.02)EEDD(-.98).N	Y	34.85	1021.4	8	1.1	511.709	2	20.07	1140000	1	3828	1	832	839	Carbamidomethylation; Amidation	C4:Carbamidomethylation:1000.00;D8:Amidation:1000.00	258.42	39	2310000000	158	153	405	73702	Hic74 [Hyriopsis cumingii]
HavB	1176704634	G.GLDLDTDTLLALS(-.98).L	Y	34.8	1344.71	13	-2.4	673.362	2	111.7	128000	1	23725	1	293	305	Amidation	S13:Amidation:1000.00	258.42	39	2310000000	158	153	405	73702	Hic74 [Hyriopsis cumingii]
HavB	1176704634	G.LASVLGDVD(+17.03)GLGGL.S	Y	34.77	1301.72	14	-1	651.866	2	105.56	1190000	1	22367	2	122	135	Replacement of proton with ammonium ion	D9:Replacement of proton with ammonium ion:12.72	258.42	39	2310000000	158	153	405	73702	Hic74 [Hyriopsis cumingii]
HavB	1176704634	G.SGGSGQG(sub R)DKVQEEI.W	Y	34.6	1389.64	14	-0.7	695.825	2	50.35	15600000	1	10462	1	816	829			258.42	39	2310000000	158	153	405	73702	Hic74 [Hyriopsis cumingii]
HavB	1176704634	G.SGGSGGSGGSGGSGQ(+.98)RDK.V	Y	34.52	1494.63	18	-7.2	748.317	2	18.88	3740000	1	3572	1	807	824	Deamidation (NQ)	Q15:Deamidation (NQ):1000.00	258.42	39	2310000000	158	153	405	73702	Hic74 [Hyriopsis cumingii]
HavB	1176704634	G.L(+71.04)GGVGGGGLDLDTDTLL.A	Y	34.49	1642.84	17	0.8	822.429	2	110.93	112000	1	23553	1	286	302	Propionamide (K X@N-term)	L1:Propionamide (K X@N-term):1000.00	258.42	39	2310000000	158	153	405	73702	Hic74 [Hyriopsis cumingii]
HavB	1176704634	G.SGGSGGSGGSGGSGQR(+14.02)DKVQEEI.W	Y	34.45	2105.96	23	2.3	702.995	3	57.27	1810000	1	11932	1	807	829	Methylation(KR)	R16:Methylation(KR):0.00	258.42	39	2310000000	158	153	405	73702	Hic74 [Hyriopsis cumingii]
HavB	1176704634	L.GLASVLGDVDGLGGLS(+162.05)ALGLGGGL.A	Y	34.36	2229.17	24	0	1115.59	2	102.19	0	1	21627	1	121	144	Hexose (NSY)	S16:Hexose (NSY):42.90	258.42	39	2310000000	158	153	405	73702	Hic74 [Hyriopsis cumingii]
HavB	1176704634	A.AAAAAEVVDEFGI(-.98).G	Y	34.31	1260.63	13	-2.5	631.323	2	94.1	70600	1	19843	1	90	102	Amidation	I13:Amidation:1000.00	258.42	39	2310000000	158	153	405	73702	Hic74 [Hyriopsis cumingii]
HavB	1176704634	A.AAEVVDEFGIGAL.A	Y	34.3	1289.65	13	0.6	645.833	2	103.1	575000	1	21826	1	93	105			258.42	39	2310000000	158	153	405	73702	Hic74 [Hyriopsis cumingii]
HavB	1176704634	A.AEVVDEFGIGAL.A	Y	34.24	1218.61	12	0.1	610.314	2	102.8	472000	1	21761	1	94	105			258.42	39	2310000000	158	153	405	73702	Hic74 [Hyriopsis cumingii]
HavB	1176704634	G.GSGGSGQG(sub R)DKVQEEIWK.K	Y	34.19	1760.83	17	-0.6	881.423	2	57.6	0	1	12003	1	815	831			258.42	39	2310000000	158	153	405	73702	Hic74 [Hyriopsis cumingii]
HavB	1176704634	A.AAAGGGGFS(-15.99)GAGAGAGARA.N	Y	34.09	1416.69	19	-1.1	709.349	2	51.68	5770000	1	10743	1	341	359	Deoxy	S9:Deoxy:1000.00	258.42	39	2310000000	158	153	405	73702	Hic74 [Hyriopsis cumingii]
HavB	1176704634	A.SVLGDVD(+37.95)GLGGL.S	Y	34.09	1138.52	12	0.5	570.267	2	100.35	1820000	1	21221	2	124	135	Replacement of 2 protons by calcium	D7:Replacement of 2 protons by calcium:18.53	258.42	39	2310000000	158	153	405	73702	Hic74 [Hyriopsis cumingii]
HavB	1176704634	K.KIDC(+57.02)EEDDN(+.98)GKYYKR.V	Y	33.93	1932.85	15	-0.7	645.291	3	33.98	3790000	1	6868	2	832	846	Carbamidomethylation; Deamidation (NQ)	C4:Carbamidomethylation:1000.00;N9:Deamidation (NQ):1000.00	258.42	39	2310000000	158	153	405	73702	Hic74 [Hyriopsis cumingii]
HavB	1176704634	A.SVLGDVD(+17.03)GLGGL.S	Y	33.86	1117.6	12	0.9	559.807	2	99.82	51800000	1	21105	10	124	135	Replacement of proton with ammonium ion	D7:Replacement of proton with ammonium ion:0.00	258.42	39	2310000000	158	153	405	73702	Hic74 [Hyriopsis cumingii]
HavB	1176704634	G.SGGSGGSGGSGQRDKVQEE(+14.02).I	Y	33.65	1791.8	19	-6.1	896.901	2	50.88	3150000	1	10574	1	810	828	Methylation(others)	E19:Methylation(others):0.00	258.42	39	2310000000	158	153	405	73702	Hic74 [Hyriopsis cumingii]
HavB	1176704634	C.EEDDN(-17.03)GKYYK.R	Y	33.43	1242.5	10	-0.6	622.259	2	45.39	1410000	1	9385	2	836	845	Ammonia-loss (N)	N5:Ammonia-loss (N):1000.00	258.42	39	2310000000	158	153	405	73702	Hic74 [Hyriopsis cumingii]
HavB	1176704634	G.GSGGSGGSGQG(sub R)DKVQEEI.W	Y	33.38	1647.73	18	-0.3	824.874	2	50.72	3620000	1	10540	1	812	829			258.42	39	2310000000	158	153	405	73702	Hic74 [Hyriopsis cumingii]
HavB	1176704634	A.AAAAEVVDE(+17.03)FGIGAL.A	Y	33.37	1448.75	15	0	725.383	2	105.76	328000	1	22412	1	91	105	Replacement of proton with ammonium ion	E9:Replacement of proton with ammonium ion:9.34	258.42	39	2310000000	158	153	405	73702	Hic74 [Hyriopsis cumingii]
HavB	1176704634	A.SVLGDVD(+37.95)GLGGLS.A	Y	32.93	1225.55	13	-0.6	613.782	2	95	289000	1	20040	1	124	136	Replacement of 2 protons by calcium	D7:Replacement of 2 protons by calcium:25.98	258.42	39	2310000000	158	153	405	73702	Hic74 [Hyriopsis cumingii]
HavB	1176704634	G.SGGSGQG(sub R)DKVQEEIWK.K	Y	32.83	1703.81	16	2.3	852.915	2	57.65	6160000	1	12013	2	816	831			258.42	39	2310000000	158	153	405	73702	Hic74 [Hyriopsis cumingii]
HavB	1176704634	K.VQEEIW(+15.99)KK.I	Y	32.79	1074.57	8	-0.1	538.293	2	39.28	9990000	1	8038	2	825	832	Oxidation (HW)	W6:Oxidation (HW):1000.00	258.42	39	2310000000	158	153	405	73702	Hic74 [Hyriopsis cumingii]
HavB	1176704634	G.G(+71.04)VGGGGLDLDTD.T	Y	32.61	1145.52	12	2.2	573.769	2	82.42	456000	1	17298	1	288	299	Propionamide (K X@N-term)	G1:Propionamide (K X@N-term):1000.00	258.42	39	2310000000	158	153	405	73702	Hic74 [Hyriopsis cumingii]
HavB	1176704634	G.LASVLGDVDGLGGLS.A	Y	32.48	1371.72	15	1.7	686.871	2	102.08	366000	1	21601	1	122	136			258.42	39	2310000000	158	153	405	73702	Hic74 [Hyriopsis cumingii]
HavB	1176704634	A.AAAAEVVDEFGI(-.98).G	Y	32.44	1189.6	12	1	595.807	2	91.95	268000	1	19374	1	91	102	Amidation	I12:Amidation:1000.00	258.42	39	2310000000	158	153	405	73702	Hic74 [Hyriopsis cumingii]
HavB	1176704634	A.AAAAGGGGFS(-15.99)GAGAGAGARA.N	Y	32.37	1487.72	20	-1	744.868	2	52.95	0	1	11017	1	340	359	Deoxy	S10:Deoxy:1000.00	258.42	39	2310000000	158	153	405	73702	Hic74 [Hyriopsis cumingii]
HavB	1176704634	R.DKVQ(+.98)EEIWK.K	Y	32.2	1174.59	9	-0.6	588.3	2	61.97	15900000	1	12936	3	823	831	Deamidation (NQ)	Q4:Deamidation (NQ):1000.00	258.42	39	2310000000	158	153	405	73702	Hic74 [Hyriopsis cumingii]
HavB	1176704634	R.VPILGASAAASAAASAG.G	Y	32.15	1383.74	17	3.7	692.878	2	82.04	125000	1	17217	1	62	78			258.42	39	2310000000	158	153	405	73702	Hic74 [Hyriopsis cumingii]
HavB	1176704634	E.EDDN(+.98)GKYYKRV.V	Y	31.96	1386.64	11	-0.7	694.327	2	34.26	677000	1	6930	2	837	847	Deamidation (NQ)	N4:Deamidation (NQ):1000.00	258.42	39	2310000000	158	153	405	73702	Hic74 [Hyriopsis cumingii]
HavB	1176704634	G.SGGSGQ(+.98)G(sub R)DKVQEEIWK.K	Y	31.95	1704.8	16	-1.6	853.404	2	59.76	4800000	1	12463	1	816	831	Deamidation (NQ)	Q6:Deamidation (NQ):115.49	258.42	39	2310000000	158	153	405	73702	Hic74 [Hyriopsis cumingii]
HavB	1176704634	E.EDDN(+.98)GKYYKRVV.K	Y	31.79	1485.71	12	0.5	496.244	3	51.41	5010000	1	10685	1	837	848	Deamidation (NQ)	N4:Deamidation (NQ):1000.00	258.42	39	2310000000	158	153	405	73702	Hic74 [Hyriopsis cumingii]
HavB	1176704634	G.GSGGSGQG(sub R)DKVQEEI.W	Y	31.72	1446.66	15	-0.8	724.336	2	50.5	7340000	1	10493	1	815	829			258.42	39	2310000000	158	153	405	73702	Hic74 [Hyriopsis cumingii]
HavB	1176704634	G.SGGSGGSGGSGQ(+.98)R(+14.02)DKVQEE.I	Y	31.7	1792.78	19	-5.6	897.393	2	53.57	4300000	1	11148	1	810	828	Deamidation (NQ); Methylation(KR)	Q12:Deamidation (NQ):13.89;R13:Methylation(KR):0.00	258.42	39	2310000000	158	153	405	73702	Hic74 [Hyriopsis cumingii]
HavB	1176704634	A.AAAEVVDE(+17.03)FGIGA.L	Y	31.69	1264.63	13	1.3	633.323	2	92.2	2870000	1	19426	1	92	104	Replacement of proton with ammonium ion	E8:Replacement of proton with ammonium ion:17.01	258.42	39	2310000000	158	153	405	73702	Hic74 [Hyriopsis cumingii]
HavB	1176704634	G.SGGSGGSGQ(+.98)G(sub R)DKVQEEI.W	Y	31.69	1591.7	17	0.5	796.856	2	53.49	9570000	1	11131	1	813	829	Deamidation (NQ)	Q9:Deamidation (NQ):81.69	258.42	39	2310000000	158	153	405	73702	Hic74 [Hyriopsis cumingii]
HavB	1176704634	A.SVLGD(+15.99)VDGLGGL.S	Y	31.56	1116.57	12	-1.9	1117.57	1	95.26	144000	1	20098	1	124	135	Oxidation or Hydroxylation	D5:Oxidation or Hydroxylation:12.19	258.42	39	2310000000	158	153	405	73702	Hic74 [Hyriopsis cumingii]
HavB	1176704634	A.GALGLASVLGDVDGL.G	Y	31.53	1355.73	15	1.2	678.873	2	111.32	234000	1	23641	1	118	132			258.42	39	2310000000	158	153	405	73702	Hic74 [Hyriopsis cumingii]
HavB	1176704634	S.GGSGGSGGSGQG(sub R)DKVQ(+.98)EEI.W	Y	31.53	1705.74	19	-0.7	853.876	2	53.85	2120000	1	11207	1	811	829	Deamidation (NQ)	Q16:Deamidation (NQ):84.49	258.42	39	2310000000	158	153	405	73702	Hic74 [Hyriopsis cumingii]
HavB	1176704634	E.VVDEFGIGALAGA(+28.03).G	Y	31.51	1245.66	13	8.6	623.843	2	82.51	882000	1	17317	1	96	108	Ethylation	A13:Ethylation:46.57	258.42	39	2310000000	158	153	405	73702	Hic74 [Hyriopsis cumingii]
HavB	1176704634	A.SVLGDVDGLGGL(-.98).S	Y	31.49	1099.59	12	1.2	550.802	2	93.9	1440000	1	19798	2	124	135	Amidation	L12:Amidation:1000.00	258.42	39	2310000000	158	153	405	73702	Hic74 [Hyriopsis cumingii]
HavB	1176704634	D.GLGGLS(+162.05)ALGLGGGL.A	Y	31.44	1302.7	14	-5.1	652.356	2	103.7	330000	1	21958	2	131	144	Hexose (NSY)	S6:Hexose (NSY):1000.00	258.42	39	2310000000	158	153	405	73702	Hic74 [Hyriopsis cumingii]
HavB	1176704634	A.SVLGDVDGLGGL(+17.03).S	Y	31.34	1117.6	12	-0.6	559.806	2	99.31	41900000	1	20993	2	124	135	Replacement of proton with ammonium ion	L12:Replacement of proton with ammonium ion:0.00	258.42	39	2310000000	158	153	405	73702	Hic74 [Hyriopsis cumingii]
HavB	1176704634	A.AAEVVDE(+17.03)FGIGAL.A	Y	31.31	1306.68	13	0.1	654.346	2	103.12	544000	1	21831	1	93	105	Replacement of proton with ammonium ion	E7:Replacement of proton with ammonium ion:0.00	258.42	39	2310000000	158	153	405	73702	Hic74 [Hyriopsis cumingii]
HavB	1176704634	G.SGGSGGSGGSGGSGQRDK.V	Y	31.26	1493.65	18	-9.2	747.823	2	17.6	0	1	3292	1	807	824			258.42	39	2310000000	158	153	405	73702	Hic74 [Hyriopsis cumingii]
HavB	1176704634	A.SVLGDVDGLGGLSALG.L	Y	31.24	1428.75	16	0.2	715.38	2	105.26	1600000	1	22301	2	124	139			258.42	39	2310000000	158	153	405	73702	Hic74 [Hyriopsis cumingii]
HavB	1176704634	L.ASVLGDVDGLGGL.S	Y	31.2	1171.61	13	0.2	586.812	2	100.71	468000	1	21301	1	123	135			258.42	39	2310000000	158	153	405	73702	Hic74 [Hyriopsis cumingii]
HavB	1176704634	S.GGSGQ(+.98)G(sub R)DKVQEEIWK.K	Y	31.17	1617.76	15	0.7	809.89	2	59.77	0	1	12465	1	817	831	Deamidation (NQ)	Q5:Deamidation (NQ):105.53	258.42	39	2310000000	158	153	405	73702	Hic74 [Hyriopsis cumingii]
HavB	1176704634	A.AAEVVDE(+37.95)FGIGA.L	Y	31.17	1214.51	12	1.1	608.264	2	90.94	102000	1	19152	1	93	104	Replacement of 2 protons by calcium	E7:Replacement of 2 protons by calcium:17.01	258.42	39	2310000000	158	153	405	73702	Hic74 [Hyriopsis cumingii]
HavB	1176704634	K.VQEEIW(+13.98)KK.I	Y	31.13	1072.56	8	0.8	537.285	2	35.28	6730000	1	7155	1	825	832	Tryptophan oxidation to oxolactone	W6:Tryptophan oxidation to oxolactone:1000.00	258.42	39	2310000000	158	153	405	73702	Hic74 [Hyriopsis cumingii]
HavB	1176704634	G.SGGSGGGGGAGGS(+238.23)GGSGGSGGSGGS.G	Y	31.1	1905.87	25	1.3	636.297	3	59.62	7450000	1	12433	1	795	819	Palmitoylation	S13:Palmitoylation:0.00	258.42	39	2310000000	158	153	405	73702	Hic74 [Hyriopsis cumingii]
HavB	1176704634	D.DN(+.98)GKYYKRVV.K	Y	30.98	1241.64	10	-0.3	621.827	2	48.96	1090000	1	10167	1	839	848	Deamidation (NQ)	N2:Deamidation (NQ):1000.00	258.42	39	2310000000	158	153	405	73702	Hic74 [Hyriopsis cumingii]
HavB	1176704634	N.GKYYKRVV.K	Y	30.86	1011.59	8	0.3	506.801	2	39.2	4220000	1	8022	1	841	848			258.42	39	2310000000	158	153	405	73702	Hic74 [Hyriopsis cumingii]
HavB	1176704634	G.SGGSGGSGQ(+.98)G(sub R)DKVQ(+.98)EEIWK.K	Y	30.85	1906.85	19	-1.9	954.433	2	62.96	697000	1	13146	1	813	831	Deamidation (NQ)	Q9:Deamidation (NQ):1000.00;Q14:Deamidation (NQ):1000.00	258.42	39	2310000000	158	153	405	73702	Hic74 [Hyriopsis cumingii]
HavB	1176704634	G.LASVLGDVDGLGGL.S	Y	30.66	1284.69	14	-1.6	643.352	2	104.99	1100000	1	22242	2	122	135			258.42	39	2310000000	158	153	405	73702	Hic74 [Hyriopsis cumingii]
HavB	1176704634	G.SGGSGGGGGAGGSGGS(+238.23)GGSGGSGGS.G	Y	30.54	1905.87	25	3.4	636.298	3	59.42	7450000	1	12389	1	795	819	Palmitoylation	S16:Palmitoylation:0.00	258.42	39	2310000000	158	153	405	73702	Hic74 [Hyriopsis cumingii]
HavB	1176704634	R.FEQYVP(+31.99)GH.G	Y	30.46	1007.43	8	0.1	504.725	2	53.84	2260000	1	11205	1	31	38	Dihydroxy	P6:Dihydroxy:20.41	258.42	39	2310000000	158	153	405	73702	Hic74 [Hyriopsis cumingii]
HavB	1176704634	G.SGGSGQG(sub R)DKVQ(+.98)EEIWK.K	Y	30.42	1704.8	16	-0.7	853.404	2	60.98	1330000	1	12724	1	816	831	Deamidation (NQ)	Q11:Deamidation (NQ):130.10	258.42	39	2310000000	158	153	405	73702	Hic74 [Hyriopsis cumingii]
HavB	1176704634	A.GGSGGSGGSGGSGGSGQRDK.V	Y	30.38	1607.69	20	-7.3	804.846	2	17.83	0	1	3342	1	805	824			258.42	39	2310000000	158	153	405	73702	Hic74 [Hyriopsis cumingii]
HavB	1176704634	A.AAAAAAAAAIR.N	Y	30.17	926.53	11	0.6	464.272	2	49.69	5940000	1	10323	1	752	762			258.42	39	2310000000	158	153	405	73702	Hic74 [Hyriopsis cumingii]
HavB	1176704634	L.GLASVLGDVDGLGGL.S	Y	30.17	1341.71	15	-0.1	671.864	2	109.94	2970000	1	23334	3	121	135			258.42	39	2310000000	158	153	405	73702	Hic74 [Hyriopsis cumingii]
HavB	1176704634	G.SGGSGQ(+.98)G(sub R)DKVQEEI.W	Y	30.13	1390.62	14	0.9	696.318	2	53.44	25800000	1	11119	1	816	829	Deamidation (NQ)	Q6:Deamidation (NQ):70.86	258.42	39	2310000000	158	153	405	73702	Hic74 [Hyriopsis cumingii]
HavB	1176704634	S.AAAAAAAAAAAS(+114.04)R.R	N	30.04	1156.59	13	-0.4	579.304	2	49.18	734000	1	10213	1	705	717	Ubiquitin	S12:Ubiquitin:1000.00	258.42	39	2310000000	158	153	405	73702	Hic74 [Hyriopsis cumingii]
HavB	1176704634	S.GGSGQG(sub R)DKVQEEI.W	Y	29.91	1302.61	13	1.1	652.311	2	50.19	0	1	10429	1	817	829			258.42	39	2310000000	158	153	405	73702	Hic74 [Hyriopsis cumingii]
HavB	1176704634	A.LGLASVLGDVDGL.G	Y	29.9	1227.67	13	-0.9	614.842	2	110.11	524000	1	23372	1	120	132			258.42	39	2310000000	158	153	405	73702	Hic74 [Hyriopsis cumingii]
HavB	1176704634	Y.VP(+31.99)GHGWVT.M	Y	29.83	883.419	8	-0.6	442.716	2	57.72	2810000	1	12027	1	35	42	Dihydroxy	P2:Dihydroxy:18.33	258.42	39	2310000000	158	153	405	73702	Hic74 [Hyriopsis cumingii]
HavB	1176704634	G.SGQG(sub R)DKVQEEIWK.K	Y	29.78	1502.74	13	-0.5	752.375	2	58.12	6950000	1	12112	2	819	831			258.42	39	2310000000	158	153	405	73702	Hic74 [Hyriopsis cumingii]
HavB	1176704634	C.EEDDN(+.98)GKYYKRVV.K	Y	29.78	1614.75	13	-0.8	539.258	3	52.17	9700000	1	10847	2	836	848	Deamidation (NQ)	N5:Deamidation (NQ):1000.00	258.42	39	2310000000	158	153	405	73702	Hic74 [Hyriopsis cumingii]
HavB	1176704634	G.SGGSGGSGQ(+.98)G(sub R)DKVQ(+.98)EEI.W	Y	29.73	1592.68	17	-2.7	797.345	2	56.53	8340000	1	11777	1	813	829	Deamidation (NQ)	Q9:Deamidation (NQ):1000.00;Q14:Deamidation (NQ):1000.00	258.42	39	2310000000	158	153	405	73702	Hic74 [Hyriopsis cumingii]
HavB	1176704634	G.GSGGSGGSGGS(+126.10)GGSG.Q	Y	29.69	1149.49	15	-0.1	575.752	2	18.18	1500000	1	3418	1	806	820	Octanoyl	S11:Octanoyl:9.42	258.42	39	2310000000	158	153	405	73702	Hic74 [Hyriopsis cumingii]
HavB	1176704634	A.SVLGDVDGLG(+17.03).G	Y	29.65	947.492	10	-1.1	474.753	2	86.97	468000	1	18287	1	124	133	Replacement of proton with ammonium ion	G10:Replacement of proton with ammonium ion:7.77	258.42	39	2310000000	158	153	405	73702	Hic74 [Hyriopsis cumingii]
HavB	1176704634	A.AAAAAAAAASR.R	N	29.64	900.478	11	-0.2	451.246	2	22.71	4230000	1	4403	1	707	717			258.42	39	2310000000	158	153	405	73702	Hic74 [Hyriopsis cumingii]
HavB	1176704634	G.SGGSGGSGGSGQR(+14.02)DKVQEEI.W	Y	29.62	1904.88	20	0.8	635.969	3	57.42	0	1	11965	1	810	829	Methylation(KR)	R13:Methylation(KR):0.00	258.42	39	2310000000	158	153	405	73702	Hic74 [Hyriopsis cumingii]
HavB	1176704634	L.GLASVLGDVDGL.G	Y	29.61	1114.59	12	0.1	558.301	2	102	1540000	1	21584	1	121	132			258.42	39	2310000000	158	153	405	73702	Hic74 [Hyriopsis cumingii]
HavB	1176704634	G.GGFGAGAGAGAGAGA.G	Y	29.53	1047.47	15	-0.1	524.744	2	58.75	6360000	1	12245	1	242	256			258.42	39	2310000000	158	153	405	73702	Hic74 [Hyriopsis cumingii]
HavB	1176704634	I.DC(+57.02)EEDDNGKYYKRVV.K	Y	29.49	1888.83	15	0.4	630.616	3	52.8	12200000	1	10984	1	834	848	Carbamidomethylation	C2:Carbamidomethylation:1000.00	258.42	39	2310000000	158	153	405	73702	Hic74 [Hyriopsis cumingii]
HavB	1176704634	A.AAAAAAAAAAGR(+14.02)GN.A	Y	29.47	1126.58	14	-0.6	564.299	2	46.33	1160000	1	9594	1	468	481	Methylation(KR)	R12:Methylation(KR):1000.00	258.42	39	2310000000	158	153	405	73702	Hic74 [Hyriopsis cumingii]
HavB	1176704634	G.GSGQG(sub R)DKVQEEIWK.K	Y	29.43	1559.76	14	-0.5	780.886	2	57.75	1270000	1	12034	1	818	831			258.42	39	2310000000	158	153	405	73702	Hic74 [Hyriopsis cumingii]
HavB	1176704634	G.SGGSGGSGGSGQ(+.98)G(sub R)DKVQ(+.98)EEI.W	Y	29.41	1793.76	20	-1.9	897.883	2	56.54	2780000	1	11778	1	810	829	Deamidation (NQ)	Q12:Deamidation (NQ):1000.00;Q17:Deamidation (NQ):1000.00	258.42	39	2310000000	158	153	405	73702	Hic74 [Hyriopsis cumingii]
HavB	1176704634	R.DKVQEEIWKKI.D	Y	29.28	1414.78	11	-0.2	472.601	3	68.4	1490000	1	14305	1	823	833			258.42	39	2310000000	158	153	405	73702	Hic74 [Hyriopsis cumingii]
HavB	1176704634	A.AAAAEVVDEFGIG.A	Y	29.18	1247.6	13	-1.5	624.808	2	93.67	210000	1	19748	1	91	103			258.42	39	2310000000	158	153	405	73702	Hic74 [Hyriopsis cumingii]
HavB	1176704634	A.S(+87.03)VLGDVDGLGGL.S	Y	29.13	1187.6	12	0.6	594.809	2	98.6	1090000	1	20836	2	124	135	Glycidamide adduct	S1:Glycidamide adduct:1000.00	258.42	39	2310000000	158	153	405	73702	Hic74 [Hyriopsis cumingii]
HavB	1176704634	R.VPILGASAAASA.A	Y	28.97	1026.57	12	-1.9	514.292	2	77.86	1700000	1	16322	1	62	73			258.42	39	2310000000	158	153	405	73702	Hic74 [Hyriopsis cumingii]
HavB	1176704634	V.VDEFGIGALAGA(+28.03).G	Y	28.93	1146.59	12	9.5	574.309	2	80.62	269000	1	16907	1	97	108	Ethylation	A12:Ethylation:60.15	258.42	39	2310000000	158	153	405	73702	Hic74 [Hyriopsis cumingii]
HavB	1176704634	K.VQEEIWK(+42.01)K.I	Y	28.71	1100.59	8	1.4	551.301	2	63.02	0	1	13159	1	825	832	Acetylation (K)	K7:Acetylation (K):0.00	258.42	39	2310000000	158	153	405	73702	Hic74 [Hyriopsis cumingii]
HavB	1176704634	G.S(sub A)AAAAAAAAAAAEVVDEFGIGALAGV(sub A).G	Y	28.59	2243.14	26	3.2	748.724	3	111.66	742000	1	23716	1	83	108			258.42	39	2310000000	158	153	405	73702	Hic74 [Hyriopsis cumingii]
HavB	1176704634	G.SGGSGGSGGSGQ(+.98)RDK.V	Y	28.59	1293.55	15	-8.6	647.779	2	18.53	3960000	1	3495	1	810	824	Deamidation (NQ)	Q12:Deamidation (NQ):1000.00	258.42	39	2310000000	158	153	405	73702	Hic74 [Hyriopsis cumingii]
HavB	1176704634	A.SVLGDVDGLGGLSALGLGGN(sub G)L.A	Y	28.58	1883	21	-1.3	942.506	2	112.05	0	1	23798	1	124	144			258.42	39	2310000000	158	153	405	73702	Hic74 [Hyriopsis cumingii]
HavB	1176704634	A.AEVVDE(+37.95)FGIGA.L	Y	28.58	1143.48	11	1.2	572.746	2	90.29	106000	1	19010	1	94	104	Replacement of 2 protons by calcium	E6:Replacement of 2 protons by calcium:17.01	258.42	39	2310000000	158	153	405	73702	Hic74 [Hyriopsis cumingii]
HavB	1176704634	R.VPILGASAAASAA.A	Y	28.5	1097.61	13	1.6	549.812	2	78.75	273000	1	16514	1	62	74			258.42	39	2310000000	158	153	405	73702	Hic74 [Hyriopsis cumingii]
HavB	1176704634	R.DKVQEEIWK.K	Y	28.44	1173.6	9	0.2	392.208	3	58.84	7260000	1	12264	1	823	831			258.42	39	2310000000	158	153	405	73702	Hic74 [Hyriopsis cumingii]
HavB	1176704634	A.SVLGDVDGLGG.L	Y	28.42	987.487	11	-1.1	494.75	2	84.23	246000	1	17690	1	124	134			258.42	39	2310000000	158	153	405	73702	Hic74 [Hyriopsis cumingii]
HavB	1176704634	E.EDDN(+.98)GKYYK.R	Y	28.33	1131.47	9	0.3	566.744	2	23.71	1160000	1	4622	1	837	845	Deamidation (NQ)	N4:Deamidation (NQ):1000.00	258.42	39	2310000000	158	153	405	73702	Hic74 [Hyriopsis cumingii]
HavB	1176704634	G.SGGSGQG(sub R)DKVQ(+.98)EEI.W	Y	28.25	1390.62	14	0.2	696.318	2	53.97	25800000	1	11232	1	816	829	Deamidation (NQ)	Q11:Deamidation (NQ):71.86	258.42	39	2310000000	158	153	405	73702	Hic74 [Hyriopsis cumingii]
HavB	1176704634	A.SVLGDVDGL.G	Y	28.23	873.444	9	0.6	437.73	2	89.83	12800000	1	18909	2	124	132			258.42	39	2310000000	158	153	405	73702	Hic74 [Hyriopsis cumingii]
HavB	1176704634	G.GSGGSGGSGGSGQRDKVQE(+14.02)E.I	Y	28.18	1848.82	20	-8.3	925.409	2	51.06	786000	1	10611	1	809	828	Methylation(others)	E19:Methylation(others):0.00	258.42	39	2310000000	158	153	405	73702	Hic74 [Hyriopsis cumingii]
HavB	1176704634	A.AAAEVVDEFGI.G	Y	28.18	1119.54	11	-0.2	560.779	2	94.73	886000	1	19981	1	92	102			258.42	39	2310000000	158	153	405	73702	Hic74 [Hyriopsis cumingii]
HavB	1176704634	A.AAEVVDE(+17.03)FGIGA.L	Y	28.08	1193.59	12	0.8	597.804	2	90.79	2580000	1	19119	2	93	104	Replacement of proton with ammonium ion	E7:Replacement of proton with ammonium ion:7.21	258.42	39	2310000000	158	153	405	73702	Hic74 [Hyriopsis cumingii]
HavB	1176704634	A.GGSGGSGGSGGS(+126.10)GGSG.Q	Y	28.07	1206.51	16	-0.5	604.263	2	18.26	1150000	1	3435	1	805	820	Octanoyl	S12:Octanoyl:8.29	258.42	39	2310000000	158	153	405	73702	Hic74 [Hyriopsis cumingii]
HavB	1176704634	G.GSGGSGGSGGSGGSGQ(+29.02)RDKVQEEIW.K	Y	28.07	2364.06	25	-2	789.025	3	57.09	0	1	11895	1	806	830	Deamidation followed by esterification with ethanol	Q16:Deamidation followed by esterification with ethanol:0.00	258.42	39	2310000000	158	153	405	73702	Hic74 [Hyriopsis cumingii]
HavB	1176704634	G.V(+71.04)GGGGLDLDTDTLL.A	Y	28.05	1415.71	14	1	708.865	2	105.43	0	1	22338	1	289	302	Propionamide (K X@N-term)	V1:Propionamide (K X@N-term):1000.00	258.42	39	2310000000	158	153	405	73702	Hic74 [Hyriopsis cumingii]
HavB	1176704634	K.VQEEIW(+3.99)KK.I	Y	27.91	1062.57	8	0.4	532.293	2	42.97	7440000	1	8851	1	825	832	Tryptophan oxidation to kynurenin	W6:Tryptophan oxidation to kynurenin:1000.00	258.42	39	2310000000	158	153	405	73702	Hic74 [Hyriopsis cumingii]
HavB	1176704634	L.GLASVLGDVD(+17.03)GLGGL.S	Y	27.75	1358.74	15	-0.6	680.377	2	110.42	2060000	1	23441	1	121	135	Replacement of proton with ammonium ion	D10:Replacement of proton with ammonium ion:0.00	258.42	39	2310000000	158	153	405	73702	Hic74 [Hyriopsis cumingii]
HavB	1176704634	G.SGGSGGSGGS(+126.10)GGSG.Q	Y	27.67	1092.47	14	0.2	547.241	2	18.03	1210000	1	3385	1	807	820	Octanoyl	S10:Octanoyl:22.45	258.42	39	2310000000	158	153	405	73702	Hic74 [Hyriopsis cumingii]
HavB	1176704634	A.AAEVVDEFGI.G	Y	27.39	1048.51	10	0	525.261	2	93.44	750000	1	19697	1	93	102			258.42	39	2310000000	158	153	405	73702	Hic74 [Hyriopsis cumingii]
HavB	1176704634	A.EVVDEFGIGA.L	Y	27.26	1034.49	10	1.2	518.254	2	89.81	11900000	1	18904	1	95	104			258.42	39	2310000000	158	153	405	73702	Hic74 [Hyriopsis cumingii]
HavB	1176704634	A.AAAAEVVDEF(-.98).G	Y	27.23	1019.49	10	0.6	510.754	2	80.72	143000	1	16929	1	91	100	Amidation	F10:Amidation:1000.00	258.42	39	2310000000	158	153	405	73702	Hic74 [Hyriopsis cumingii]
HavB	1176704634	G.GSGQ(+.98)G(sub R)DKVQEEIWK.K	Y	27.18	1560.74	14	-1.6	781.377	2	59.9	6240000	1	12493	1	818	831	Deamidation (NQ)	Q4:Deamidation (NQ):115.97	258.42	39	2310000000	158	153	405	73702	Hic74 [Hyriopsis cumingii]
HavB	1176704634	G.FGGGAGAGAGAGA.G	Y	27.16	919.415	13	0.6	460.715	2	56.81	18200000	1	11836	1	222	234			258.42	39	2310000000	158	153	405	73702	Hic74 [Hyriopsis cumingii]
HavB	1176704634	L.LALSLGLGF(sub I)GGGEADDL.A	Y	27	1603.81	17	-4.4	802.908	2	110.12	326000	1	23374	1	302	318			258.42	39	2310000000	158	153	405	73702	Hic74 [Hyriopsis cumingii]
HavB	1176704634	K.KIDC(+57.02)EEDDN.G	Y	26.94	1136.43	9	-0.7	569.221	2	20.93	1230000	1	4014	1	832	840	Carbamidomethylation	C4:Carbamidomethylation:1000.00	258.42	39	2310000000	158	153	405	73702	Hic74 [Hyriopsis cumingii]
HavB	1176704634	K.IDC(+57.02)EEDDN(-17.03)GK.Y	Y	26.93	1176.42	10	-0.3	589.219	2	22.68	986000	1	4397	1	833	842	Carbamidomethylation; Ammonia-loss (N)	C3:Carbamidomethylation:1000.00;N8:Ammonia-loss (N):1000.00	258.42	39	2310000000	158	153	405	73702	Hic74 [Hyriopsis cumingii]
HavB	1176704634	G.SGQRDK(+14.96)VQEEIWK.K	Y	26.67	1616.78	13	0.6	809.398	2	57.61	359000	1	12004	1	819	831	Alpha-amino adipic acid	K6:Alpha-amino adipic acid:213.20	258.42	39	2310000000	158	153	405	73702	Hic74 [Hyriopsis cumingii]
HavB	1176704634	R.DKVQEEI(-.98).W	Y	26.64	858.445	7	0.3	430.23	2	41.45	21200000	1	8515	1	823	829	Amidation	I7:Amidation:1000.00	258.42	39	2310000000	158	153	405	73702	Hic74 [Hyriopsis cumingii]
HavB	1176704634	G.GS(sub A)AAAAAAAAAAAEVVDEFGIGALAGV(sub A).G	Y	26.62	2300.16	27	3.8	767.732	3	111.55	172000	2	24363	1	82	108			258.42	39	2310000000	158	153	405	73702	Hic74 [Hyriopsis cumingii]
HavB	1176704634	F.GAGAGAGAGAGAGA.G	N	26.6	914.42	14	0.4	458.218	2	26.28	2250000	1	5182	1	245	258			258.42	39	2310000000	158	153	405	73702	Hic74 [Hyriopsis cumingii]
HavB	1176704634	G.GSGGSGGSGQ(+.98)G(sub R)DKVQEEI.W	Y	26.58	1648.72	18	0.2	825.366	2	53.5	4750000	1	11133	1	812	829	Deamidation (NQ)	Q10:Deamidation (NQ):87.95	258.42	39	2310000000	158	153	405	73702	Hic74 [Hyriopsis cumingii]
HavB	1176704634	K.IDC(+57.02)EEDDN(+.98)GKYYKRVV.K	Y	26.53	2002.89	16	0.7	668.639	3	57.01	337000	1	11877	1	833	848	Carbamidomethylation; Deamidation (NQ)	C3:Carbamidomethylation:1000.00;N8:Deamidation (NQ):1000.00	258.42	39	2310000000	158	153	405	73702	Hic74 [Hyriopsis cumingii]
HavB	1176704634	D.N(+.98)GKYYKRVV.K	Y	26.45	1126.61	9	-1.4	376.545	3	42.75	3750000	1	8803	1	840	848	Deamidation (NQ)	N1:Deamidation (NQ):1000.00	258.42	39	2310000000	158	153	405	73702	Hic74 [Hyriopsis cumingii]
HavB	1176704634	A.SVLGD(-18.01)VDGLGGL.S	Y	26.43	1082.56	12	0.5	542.288	2	102.94	499000	1	21791	1	124	135	Dehydration	D5:Dehydration:11.10	258.42	39	2310000000	158	153	405	73702	Hic74 [Hyriopsis cumingii]
HavB	1176704634	K.IDC(+57.02)EEDDN(+.98)GK.Y	Y	26.39	1194.43	10	-1.3	598.224	2	21.58	17900000	1	4156	3	833	842	Carbamidomethylation; Deamidation (NQ)	C3:Carbamidomethylation:1000.00;N8:Deamidation (NQ):1000.00	258.42	39	2310000000	158	153	405	73702	Hic74 [Hyriopsis cumingii]
HavB	1176704634	F.GGAAS(sub A)AAAAAAAAAEVVDEFGIGALAGV(sub A).G	Y	26.38	2357.19	28	3.9	786.739	3	111.79	0	1	23745	1	81	108			258.42	39	2310000000	158	153	405	73702	Hic74 [Hyriopsis cumingii]
HavB	1176704634	S.GGSGQG(sub R)DKVQ(+.98)EEIWK.K	Y	26.32	1617.76	15	-2.1	809.887	2	61.06	0	1	12740	1	817	831	Deamidation (NQ)	Q10:Deamidation (NQ):105.53	258.42	39	2310000000	158	153	405	73702	Hic74 [Hyriopsis cumingii]
HavB	1176704634	G.LASVLGDVDGLGGLS(+17.03).A	Y	26.3	1388.75	15	3	695.385	2	102.07	709000	1	21599	2	122	136	Replacement of proton with ammonium ion	S15:Replacement of proton with ammonium ion:53.33	258.42	39	2310000000	158	153	405	73702	Hic74 [Hyriopsis cumingii]
HavB	1176704634	A.AAAAAAAIR.N	Y	26.25	784.456	9	-0.2	393.235	2	31.46	4520000	1	6317	1	754	762			258.42	39	2310000000	158	153	405	73702	Hic74 [Hyriopsis cumingii]
HavB	1176704634	S.GGSGGSGQ(+.98)G(sub R)DKVQEEI.W	Y	26.14	1504.66	16	1.3	753.34	2	53.42	5730000	1	11117	1	814	829	Deamidation (NQ)	Q8:Deamidation (NQ):71.86	258.42	39	2310000000	158	153	405	73702	Hic74 [Hyriopsis cumingii]
HavB	1176704634	G.G(+71.04)VGGGGLDLDTDT.L	Y	26.14	1246.57	13	-0.5	624.291	2	82.44	499000	1	17303	1	288	300	Propionamide (K X@N-term)	G1:Propionamide (K X@N-term):1000.00	258.42	39	2310000000	158	153	405	73702	Hic74 [Hyriopsis cumingii]
HavB	1176704634	K.VQEEIW(+3.99)K.K	Y	26.1	934.476	7	0.2	468.245	2	56.73	50800000	1	11819	1	825	831	Tryptophan oxidation to kynurenin	W6:Tryptophan oxidation to kynurenin:1000.00	258.42	39	2310000000	158	153	405	73702	Hic74 [Hyriopsis cumingii]
HavB	1176704634	A.AAAAAAAAAGGG.G	N	26.08	828.409	12	-0.7	415.212	2	31.3	1510000	1	6281	1	335	346			258.42	39	2310000000	158	153	405	73702	Hic74 [Hyriopsis cumingii]
HavB	1176704634	V.QEEIWKKI.D	Y	26.08	1072.59	8	0	537.303	2	62.09	102000000	1	12962	2	826	833			258.42	39	2310000000	158	153	405	73702	Hic74 [Hyriopsis cumingii]
HavB	1176704634	A.SVLGDVDGLG(-.98).G	Y	26.07	929.482	10	0.3	465.748	2	80.46	221000	1	16874	1	124	133	Amidation	G10:Amidation:1000.00	258.42	39	2310000000	158	153	405	73702	Hic74 [Hyriopsis cumingii]
HavB	1176704634	G.SGGSGQ(+.98)G(sub R)DKVQ(+.98)EEIWK.K	Y	26.07	1705.78	16	-1.7	853.896	2	63.22	2600000	1	13202	1	816	831	Deamidation (NQ)	Q6:Deamidation (NQ):1000.00;Q11:Deamidation (NQ):1000.00	258.42	39	2310000000	158	153	405	73702	Hic74 [Hyriopsis cumingii]
HavB	1176704634	A.SVLGDVD(+17.03)GLGGLSAL.G	Y	26.04	1388.75	15	-1	695.382	2	107.32	962000	1	22756	2	124	138	Replacement of proton with ammonium ion	D7:Replacement of proton with ammonium ion:0.00	258.42	39	2310000000	158	153	405	73702	Hic74 [Hyriopsis cumingii]
HavB	1176704634	E.DDN(+.98)GKYYKRVV.K	Y	26.02	1356.67	11	-0.2	453.23	3	51.79	6500000	1	10767	1	838	848	Deamidation (NQ)	N3:Deamidation (NQ):1000.00	258.42	39	2310000000	158	153	405	73702	Hic74 [Hyriopsis cumingii]
HavB	1176704634	K.IDC(+57.02)EEDD(+43.99)NGKYYKR.V	Y	26.01	1847.76	14	-0.9	616.928	3	51.96	1280000	1	10803	1	833	846	Carbamidomethylation; Carboxylation (DKW)	C3:Carbamidomethylation:1000.00;D7:Carboxylation (DKW):12.33	258.42	39	2310000000	158	153	405	73702	Hic74 [Hyriopsis cumingii]
HavB	1176704634	I.DC(+57.02)EEDDNGKYYKRV.V	Y	25.96	1789.76	14	1.1	597.594	3	40.75	2120000	1	8361	1	834	847	Carbamidomethylation	C2:Carbamidomethylation:1000.00	258.42	39	2310000000	158	153	405	73702	Hic74 [Hyriopsis cumingii]
HavB	1176704634	G.SGGSGQ(+.98)G(sub R)DKVQ(+.98)EEI.W	Y	25.82	1391.61	14	-1.9	696.808	2	56.57	24400000	1	11785	1	816	829	Deamidation (NQ)	Q6:Deamidation (NQ):1000.00;Q11:Deamidation (NQ):1000.00	258.42	39	2310000000	158	153	405	73702	Hic74 [Hyriopsis cumingii]
HavB	1176704634	V.Q(+.98)EEIWKKI.D	Y	25.44	1073.58	8	2.8	537.797	2	65.56	2050000	1	13700	1	826	833	Deamidation (NQ)	Q1:Deamidation (NQ):1000.00	258.42	39	2310000000	158	153	405	73702	Hic74 [Hyriopsis cumingii]
HavB	1176704634	G.SGQ(+.98)G(sub R)DKVQEEIWK.K	Y	25.22	1503.72	13	1.8	752.869	2	62.99	2620000	1	13153	1	819	831	Deamidation (NQ)	Q3:Deamidation (NQ):107.30	258.42	39	2310000000	158	153	405	73702	Hic74 [Hyriopsis cumingii]
HavB	1176704634	G.GGLDLDTDTLLA.L	Y	25.17	1202.6	12	0.8	602.309	2	100.46	1040000	1	21245	2	292	303			258.42	39	2310000000	158	153	405	73702	Hic74 [Hyriopsis cumingii]
HavB	1176704634	A.SVLGDVD(-18.01)GL.G	Y	25.17	855.434	9	1.3	428.725	2	89.49	274000	1	18834	1	124	132	Dehydration	D7:Dehydration:22.87	258.42	39	2310000000	158	153	405	73702	Hic74 [Hyriopsis cumingii]
HavB	1176704634	L.GLASVLGD(+17.03)VDGLGGL.S	Y	25.14	1358.74	15	-1.1	680.377	2	108.96	3710000	1	23118	2	121	135	Replacement of proton with ammonium ion	D8:Replacement of proton with ammonium ion:13.67	258.42	39	2310000000	158	153	405	73702	Hic74 [Hyriopsis cumingii]
HavB	1176704634	V.P(+31.99)GHGWVT.M	Y	25.12	784.35	7	0.3	393.183	2	48.51	2080000	1	10070	1	36	42	Dihydroxy	P1:Dihydroxy:11.75	258.42	39	2310000000	158	153	405	73702	Hic74 [Hyriopsis cumingii]
HavB	1176704634	A.AAAAAEVVDEF(-.98).G	Y	25.1	1090.53	11	1.8	546.273	2	83.58	106000	1	17549	1	90	100	Amidation	F11:Amidation:1000.00	258.42	39	2310000000	158	153	405	73702	Hic74 [Hyriopsis cumingii]
HavB	1176704634	K.IDC(+57.02)EEDDNGK.Y	Y	25.1	1193.45	10	0.6	597.733	2	19.96	6630000	1	3804	1	833	842	Carbamidomethylation	C3:Carbamidomethylation:1000.00	258.42	39	2310000000	158	153	405	73702	Hic74 [Hyriopsis cumingii]
HavB	1176704634	K.VQEEIWKK.I	Y	25.01	1058.58	8	-0.9	530.295	2	49.09	10600000	1	10195	1	825	832			258.42	39	2310000000	158	153	405	73702	Hic74 [Hyriopsis cumingii]
HavB	1176704634	A.G(+28.03)GGGGFGAGAGA.G	Y	24.93	862.393	12	-0.3	432.204	2	55.85	2190000	1	11635	1	239	250	Ethylation	G1:Ethylation:45.45	258.42	39	2310000000	158	153	405	73702	Hic74 [Hyriopsis cumingii]
HavB	1176704634	V.QEEIW(+15.99)K.K	Y	24.85	847.408	6	-1	424.711	2	46.41	1470000	1	9612	1	826	831	Oxidation (HW)	W5:Oxidation (HW):1000.00	258.42	39	2310000000	158	153	405	73702	Hic74 [Hyriopsis cumingii]
HavB	1176704634	V.LGDVDGLGGLS.A	Y	24.84	1001.5	11	-0.5	501.759	2	86.26	214000	1	18131	1	126	136			258.42	39	2310000000	158	153	405	73702	Hic74 [Hyriopsis cumingii]
HavB	1176704634	A.SVLGDVDGL(-.98).G	Y	24.83	872.46	9	-0.2	437.237	2	84.27	344000	1	17698	1	124	132	Amidation	L9:Amidation:1000.00	258.42	39	2310000000	158	153	405	73702	Hic74 [Hyriopsis cumingii]
HavB	1176704634	G.A(+71.04)GAGAGGAGALGLA.S	Y	24.66	1083.57	14	1.1	542.792	2	75.23	197000	1	15765	1	110	123	Propionamide (K X@N-term)	A1:Propionamide (K X@N-term):1000.00	258.42	39	2310000000	158	153	405	73702	Hic74 [Hyriopsis cumingii]
HavB	1176704634	L.GLASVLGDVDGLGGLS(+17.03).A	Y	24.64	1445.77	16	-0.1	723.894	2	105.33	1480000	1	22316	1	121	136	Replacement of proton with ammonium ion	S16:Replacement of proton with ammonium ion:23.15	258.42	39	2310000000	158	153	405	73702	Hic74 [Hyriopsis cumingii]
HavB	1176704634	G.SAAAAAAAAAAA.G	N	24.64	886.451	12	-0.9	444.232	2	55.97	13500000	1	11659	1	332	343			258.42	39	2310000000	158	153	405	73702	Hic74 [Hyriopsis cumingii]
HavB	1176704634	A.AAEVVDEFGIG.A	Y	24.6	1105.53	11	2	553.773	2	89.82	4100000	1	18906	1	93	103			258.42	39	2310000000	158	153	405	73702	Hic74 [Hyriopsis cumingii]
HavB	1176704634	S.GGSGGSGQ(+.98)G(sub R)DKVQ(+.98)EEI.W	Y	24.59	1505.65	16	-2.1	753.83	2	56.59	4600000	1	11790	1	814	829	Deamidation (NQ)	Q8:Deamidation (NQ):1000.00;Q13:Deamidation (NQ):1000.00	258.42	39	2310000000	158	153	405	73702	Hic74 [Hyriopsis cumingii]
HavB	1176704634	G.SGGSGGSGGSGQ(+.98)R(+14.02)DKVQEEI.W	Y	24.45	1905.87	20	1.7	636.297	3	60.67	3030000	1	12659	1	810	829	Deamidation (NQ); Methylation(KR)	Q12:Deamidation (NQ):0.00;R13:Methylation(KR):0.00	258.42	39	2310000000	158	153	405	73702	Hic74 [Hyriopsis cumingii]
HavB	1176704634	G.LGGL(sub V)GGGGLDLDTDTL.L	Y	24.4	1472.74	16	1.6	737.376	2	100.15	3100000	1	21176	1	286	301			258.42	39	2310000000	158	153	405	73702	Hic74 [Hyriopsis cumingii]
HavB	1176704634	K.VQEEIWK.K	Y	24.38	930.481	7	-0.7	466.248	2	59.84	646000000	1	12479	1	825	831			258.42	39	2310000000	158	153	405	73702	Hic74 [Hyriopsis cumingii]
HavB	1176704634	A.AAAAAEVVDE(+17.03)FGIGAL.A	Y	24.03	1519.79	16	-2.2	760.9	2	107.23	242000	1	22738	1	90	105	Replacement of proton with ammonium ion	E10:Replacement of proton with ammonium ion:0.00	258.42	39	2310000000	158	153	405	73702	Hic74 [Hyriopsis cumingii]
HavB	1176704634	R.DKVQ(+.98)EEIWKKI.D	Y	24.03	1415.77	11	0	472.929	3	72.55	0	1	15191	1	823	833	Deamidation (NQ)	Q4:Deamidation (NQ):1000.00	258.42	39	2310000000	158	153	405	73702	Hic74 [Hyriopsis cumingii]
HavB	1176704634	A.AEVVDE(+17.03)FGIGAL.A	Y	23.95	1235.64	12	-1.2	618.826	2	102.95	454000	1	21794	1	94	105	Replacement of proton with ammonium ion	E6:Replacement of proton with ammonium ion:8.14	258.42	39	2310000000	158	153	405	73702	Hic74 [Hyriopsis cumingii]
HavB	1176704634	A.GLGAGIGLGAGLGA.G	Y	23.94	1082.61	14	1.4	542.312	2	93.23	176000	1	19651	1	261	274			258.42	39	2310000000	158	153	405	73702	Hic74 [Hyriopsis cumingii]
HavB	1176704634	K.KIDC(+57.02)EEDDN(+.98).G	Y	23.87	1137.41	9	0.3	569.714	2	23.39	2190000	1	4549	1	832	840	Carbamidomethylation; Deamidation (NQ)	C4:Carbamidomethylation:1000.00;N9:Deamidation (NQ):1000.00	258.42	39	2310000000	158	153	405	73702	Hic74 [Hyriopsis cumingii]
HavB	1176704634	G.G(+71.04)GGGFGAGA.G	Y	23.84	720.319	9	-1.6	361.166	2	49.95	2110000	1	10376	1	240	248	Propionamide (K X@N-term)	G1:Propionamide (K X@N-term):1000.00	258.42	39	2310000000	158	153	405	73702	Hic74 [Hyriopsis cumingii]
HavB	2772914	G.GLGGGLGGGLGGLGGGAGGAGAGGNG(+43.04).G	Y	51.62	1866.93	26	-2.6	934.47	2	92.14	25800000	2	20086	10	769	794	Carboxyl modification with ethanolamine	G26:Carboxyl modification with ethanolamine:1000.00	160.15	7	85600000	26	25	49	80315	precollagen D [Mytilus edulis]
HavB	2772914	L.GGLGGGLGGGLGGLGGGAGG(-.98).A	Y	45.15	1395.72	20	0.9	698.869	2	81.79	331000	1	17163	1	768	787	Amidation	G20:Amidation:1000.00	160.15	7	85600000	26	25	49	80315	precollagen D [Mytilus edulis]
HavB	2772914	A.GGLGGGLGGGLGGLGGAGG(-.98).L	Y	41.35	1338.7	19	2.7	670.359	2	82.29	574000	1	17270	1	744	762	Amidation	G19:Amidation:1000.00	160.15	7	85600000	26	25	49	80315	precollagen D [Mytilus edulis]
HavB	2772914	G.GLGGGLGGGLGGLGGGAG(-.98).G	Y	37.73	1281.68	18	1.2	641.847	2	82.84	1810000	1	17389	1	769	786	Amidation	G18:Amidation:1000.00	160.15	7	85600000	26	25	49	80315	precollagen D [Mytilus edulis]
HavB	2772914	L.GGLGGGLGGGLGGLGGGAGGAGAGGNG(+43.04).G	Y	36.92	1923.95	27	-3.9	962.979	2	94.93	206000	2	20703	3	768	794	Carboxyl modification with ethanolamine	G27:Carboxyl modification with ethanolamine:1000.00	160.15	7	85600000	26	25	49	80315	precollagen D [Mytilus edulis]
HavB	2772914	L.GGGLGGGLGGLGGGAGGAGAGGNG(+43.04).G	Y	36.37	1696.82	24	-4.3	849.416	2	89.79	5540000	1	18900	2	771	794	Carboxyl modification with ethanolamine	G24:Carboxyl modification with ethanolamine:1000.00	160.15	7	85600000	26	25	49	80315	precollagen D [Mytilus edulis]
HavB	2772914	G.GGAGGAGAGGN(+203.08)GGAGAGGAG.G	Y	35.49	1502.63	20	1.2	752.325	2	35.31	692000	1	7163	1	783	802	HexNAcylation (N)	N11:HexNAcylation (N):1000.00	160.15	7	85600000	26	25	49	80315	precollagen D [Mytilus edulis]
HavB	2772914	G.LGGGLGGGLGGLGGGAGGAGAGGNG(+43.04).G	Y	35.36	1809.91	25	-8.6	905.953	2	94.55	1340000	1	19943	2	770	794	Carboxyl modification with ethanolamine	G25:Carboxyl modification with ethanolamine:1000.00	160.15	7	85600000	26	25	49	80315	precollagen D [Mytilus edulis]
HavB	2772914	L.GGLGGGLGGGLGGLGGGAGG.A	Y	34.82	1396.71	20	0	699.36	2	85.53	1090000	1	17972	1	768	787			160.15	7	85600000	26	25	49	80315	precollagen D [Mytilus edulis]
HavB	2772914	A.GGLGGGLGGGLGGLGGA(-.98).G	Y	34.77	1224.66	17	1	613.337	2	83.51	802000	1	17535	1	744	760	Amidation	A17:Amidation:1000.00	160.15	7	85600000	26	25	49	80315	precollagen D [Mytilus edulis]
HavB	2772914	G.GGLGGLGGGLGGGLGG(-.98).L	Y	33.37	1153.62	16	0.7	577.818	2	82.76	606000	1	17372	1	765	780	Amidation	G16:Amidation:1000.00	160.15	7	85600000	26	25	49	80315	precollagen D [Mytilus edulis]
HavB	2772914	G.GGLGGGLGGLGGGAGGAGAGGNG(+43.04).G	Y	32.87	1639.8	23	-5.5	820.904	2	90.14	1480000	1	18978	2	772	794	Carboxyl modification with ethanolamine	G23:Carboxyl modification with ethanolamine:1000.00	160.15	7	85600000	26	25	49	80315	precollagen D [Mytilus edulis]
HavB	2772914	A.GGLGGGLGGGLGGLGGAGGLGG(+387.13).G	Y	32.72	1953.94	22	4.4	977.981	2	93.76	252000	1	19769	1	744	765	Triglutamyl	G22:Triglutamyl:1000.00	160.15	7	85600000	26	25	49	80315	precollagen D [Mytilus edulis]
HavB	2772914	L.GGLGGGLGGGLGGLGGGAGG(+17.03).A	Y	32.2	1413.73	20	0.8	707.874	2	83.84	2250000	2	18252	2	768	787	Replacement of proton with ammonium ion	G20:Replacement of proton with ammonium ion:1000.00	160.15	7	85600000	26	25	49	80315	precollagen D [Mytilus edulis]
HavB	2772914	G.GLGGGLGGLGGGAGGAGAGGNG(+43.04).G	Y	31.75	1582.78	22	-3.4	792.395	2	87.21	1700000	1	18339	1	773	794	Carboxyl modification with ethanolamine	G22:Carboxyl modification with ethanolamine:1000.00	160.15	7	85600000	26	25	49	80315	precollagen D [Mytilus edulis]
HavB	2772914	L.GGGLGGGLGGLGGGAG.G	Y	31.5	1112.56	16	-0.7	557.286	2	77.53	830000	1	16252	1	771	786			160.15	7	85600000	26	25	49	80315	precollagen D [Mytilus edulis]
HavB	2772914	G.GGAGGAGAGGN(+162.05)GGAGAGGA.G	Y	29.75	1404.59	19	-1.1	703.3	2	30.49	1780000	1	6106	1	783	801	Hexose (NSY)	N11:Hexose (NSY):1000.00	160.15	7	85600000	26	25	49	80315	precollagen D [Mytilus edulis]
HavB	2772914	A.GGLGGGLGGGLGGLGGAGG(+17.03).L	Y	29.53	1356.71	19	0	679.363	2	86.56	5500000	1	18196	2	744	762	Replacement of proton with ammonium ion	G19:Replacement of proton with ammonium ion:1000.00	160.15	7	85600000	26	25	49	80315	precollagen D [Mytilus edulis]
HavB	2772914	G.GLGGGLGGGLGGLGGGAGG.A	Y	29.52	1339.68	19	-1.5	670.848	2	86.06	3130000	1	18087	1	769	787			160.15	7	85600000	26	25	49	80315	precollagen D [Mytilus edulis]
HavB	2772914	G.GGAGGAGAGGN(+162.05)GGAGAGGAG.G	Y	29.4	1461.61	20	0.5	731.812	2	28.83	2950000	1	5740	1	783	802	Hexose (NSY)	N11:Hexose (NSY):1000.00	160.15	7	85600000	26	25	49	80315	precollagen D [Mytilus edulis]
HavB	2772914	A.GGLGGGLGGGLGGLGGAGG.L	Y	28.15	1339.68	19	-1	670.849	2	86.57	3130000	1	18198	1	744	762			160.15	7	85600000	26	25	49	80315	precollagen D [Mytilus edulis]
HavB	2772914	A.GGLGGGLGGLGGGLG(-.98).G	N	27.84	1096.6	15	-0.6	549.306	2	83.45	1090000	1	17521	1	761	775	Amidation	G15:Amidation:1000.00	160.15	7	85600000	26	25	49	80315	precollagen D [Mytilus edulis]
HavB	2772914	G.GGAGGAGAGGN(+203.08)GGAGAG.G	Y	27.62	1317.55	17	0.4	659.785	2	29.63	1900000	1	5918	1	783	799	HexNAcylation (N)	N11:HexNAcylation (N):1000.00	160.15	7	85600000	26	25	49	80315	precollagen D [Mytilus edulis]
HavB	2772914	L.GGLGGGLGGGLGGLGGGAGGAGAGGN(+43.04).G	Y	26.63	1866.93	26	-4.7	623.314	3	96.39	622000	1	20349	1	768	793	Carboxyl modification with ethanolamine	N26:Carboxyl modification with ethanolamine:1000.00	160.15	7	85600000	26	25	49	80315	precollagen D [Mytilus edulis]
HavB	2772914	T.TGR(+28.03)PGPSGA.P	Y	26.6	826.43	9	0.3	414.222	2	33.91	4090000	1	6854	1	352	360	Dimethylation(KR)	R3:Dimethylation(KR):1000.00	160.15	7	85600000	26	25	49	80315	precollagen D [Mytilus edulis]
HavB	2772914	A.GGLGGGLGGGLGGLGGAGGLGGGLGGL(+387.13).G	Y	26.36	2351.17	27	5.3	1176.6	2	103.99	81000	1	22022	1	744	770	Triglutamyl	L27:Triglutamyl:1000.00	160.15	7	85600000	26	25	49	80315	precollagen D [Mytilus edulis]
HavB	2772914	A.GGLGGGLGGGLGGLGGAG(+17.03).G	Y	26.3	1299.69	18	0.4	650.852	2	86.72	5990000	1	18231	1	744	761	Replacement of proton with ammonium ion	G18:Replacement of proton with ammonium ion:1000.00	160.15	7	85600000	26	25	49	80315	precollagen D [Mytilus edulis]
HavB	2772914	A.GGLGGGLGGGLGGLGGAG.G	Y	26.19	1282.66	18	1.7	642.34	2	86.75	3870000	1	18237	1	744	761			160.15	7	85600000	26	25	49	80315	precollagen D [Mytilus edulis]
HavB	2772914	G.GLGGGLGGGLGGLGGAGG(+21.98).L	Y	25.3	1304.64	18	-3	653.328	2	86.36	136000	1	18152	1	745	762	Sodium adduct	G18:Sodium adduct:1000.00	160.15	7	85600000	26	25	49	80315	precollagen D [Mytilus edulis]
HavB	2772914	A.GGLGGGLGGGLGGLGGA(+17.03).G	Y	25.11	1242.67	17	-0.1	622.341	2	87.93	4370000	1	18496	1	744	760	Replacement of proton with ammonium ion	A17:Replacement of proton with ammonium ion:1000.00	160.15	7	85600000	26	25	49	80315	precollagen D [Mytilus edulis]
HavB	2772914	G.GLGGGLGGGLGGLGGAGGLGGG(+387.13).L	Y	24.93	1953.94	22	6	977.983	2	91.3	85100	1	19232	1	745	766	Triglutamyl	G22:Triglutamyl:1000.00	160.15	7	85600000	26	25	49	80315	precollagen D [Mytilus edulis]
HavB	2772914	G.GGLGGLGGGLGGGLGGLGGGAGG(+37.95).A	Y	24.47	1661.78	23	-6.5	831.892	2	86.49	92100	1	18180	1	765	787	Replacement of 2 protons by calcium	G23:Replacement of 2 protons by calcium:1000.00	160.15	7	85600000	26	25	49	80315	precollagen D [Mytilus edulis]
HavB	2772914	A.GGAGAGGN(+162.05)GGAGAGGA.G	Y	23.99	1219.51	16	0.3	610.761	2	25.07	2610000	1	4919	1	786	801	Hexose (NSY)	N8:Hexose (NSY):1000.00	160.15	7	85600000	26	25	49	80315	precollagen D [Mytilus edulis]
HavB	2204081	L.GGGLGGLGGLGGLGGYGGS(-18.01)AAA.A	Y	36.43	1656.82	22	-3.2	829.416	2	86.31	5070000	1	18142	2	264	285	Dehydration	S19:Dehydration:22.69	123.55	20	64200000	19	13	35	61723	insoluble protein [Pinctada fucata]
HavB	2204081	L.GGGLGGLGGLGGLGGY(-18.01)GGSAA.A	Y	32.81	1585.78	21	-4.2	793.896	2	87.87	779000	1	18481	1	264	284	Dehydration	Y16:Dehydration:38.16	123.55	20	64200000	19	13	35	61723	insoluble protein [Pinctada fucata]
HavB	2204081	A.G(+56.06)AGGGGFGGLGGLGGLGGGSA.A	Y	32.56	1587.8	21	6.8	794.913	2	79.41	229000	1	16651	1	489	509	Diethylation	G1:Diethylation:1000.00	123.55	20	64200000	19	13	35	61723	insoluble protein [Pinctada fucata]
HavB	2204081	L.GGLGGGLGGLGGLGGLGGYGGS(-18.01)AAA.A	Y	32.45	1883.95	25	0.4	942.982	2	95.35	51200000	1	20118	14	261	285	Dehydration	S22:Dehydration:29.32	123.55	20	64200000	19	13	35	61723	insoluble protein [Pinctada fucata]
HavB	2204081	L.GGGLGGLGGLGGLGGYGGSAAA(+21.98).A	Y	32.21	1696.81	22	-2.3	849.413	2	88.28	917000	1	18572	1	264	285	Sodium adduct	A22:Sodium adduct:1000.00	123.55	20	64200000	19	13	35	61723	insoluble protein [Pinctada fucata]
HavB	2204081	G.GLGGLGGGLGGLGGLGGLGGYGGS(-18.01)AAA.A	Y	31.93	2054.05	27	0.4	1028.03	2	100.79	244000	1	21320	1	259	285	Dehydration	S24:Dehydration:22.45	123.55	20	64200000	19	13	35	61723	insoluble protein [Pinctada fucata]
HavB	2204081	A.GAGLGLGLGGGLGGGLGGLGGLGG(+258.09).L	Y	31.11	2051.06	24	-8	1026.53	2	103.88	238000	1	21998	2	144	167	Diglutamyl	G24:Diglutamyl:1000.00	123.55	20	64200000	19	13	35	61723	insoluble protein [Pinctada fucata]
HavB	2204081	L.GGGLGGLGGLGGLGGYGGS(-18.01)AAAAAAA.A	Y	29.41	1940.97	26	-4.5	971.488	2	93.85	224000	1	19789	1	264	289	Dehydration	S19:Dehydration:0.00	123.55	20	64200000	19	13	35	61723	insoluble protein [Pinctada fucata]
HavB	2204081	F.GGLGGF(sub L)GGLGGGSAAAAAAAAAAASR(sub G)GG.G	Y	29.38	2130.06	28	1.8	711.028	3	88.31	438000	1	18577	1	496	523			123.55	20	64200000	19	13	35	61723	insoluble protein [Pinctada fucata]
HavB	2204081	A.G(+56.06)AGGGGFGGLGGLGGLGGGSAA.A	Y	28.64	1658.84	22	2.1	830.428	2	79.2	135000	1	16608	1	489	510	Diethylation	G1:Diethylation:1000.00	123.55	20	64200000	19	13	35	61723	insoluble protein [Pinctada fucata]
HavB	2204081	L.GGLGGGLGGLGGGLG(-.98).G	N	27.84	1096.6	15	-0.6	549.306	2	83.45	1090000	1	17521	1	254	268	Amidation	G15:Amidation:1000.00	123.55	20	64200000	19	13	35	61723	insoluble protein [Pinctada fucata]
HavB	2204081	G.GLGGGLGGLGGLGGLGGYGGS(-18.01)AAA.A	Y	27.41	1826.93	24	-2.2	914.469	2	94.49	928000	1	19928	1	262	285	Dehydration	S21:Dehydration:16.66	123.55	20	64200000	19	13	35	61723	insoluble protein [Pinctada fucata]
HavB	2204081	G.LGGLGGGLGGLGGLGGLGGYGGS(-18.01)AAA.A	Y	26.94	1997.03	26	-2.9	999.521	2	102.67	708000	1	21732	1	260	285	Dehydration	S23:Dehydration:24.24	123.55	20	64200000	19	13	35	61723	insoluble protein [Pinctada fucata]
HavB	2204081	G.GAGAGAGAGAGAGA.G	N	26.6	914.42	14	0.4	458.218	2	26.28	2250000	1	5182	1	130	143			123.55	20	64200000	19	13	35	61723	insoluble protein [Pinctada fucata]
HavB	2204081	G.AGGGAGGGAGAGAGAGAGAG(+14.02).A	N	26.18	1284.58	20	2.3	643.299	2	31.62	947000	1	6350	1	123	142	Methylation(C-term)	G20:Methylation(C-term):1000.00	123.55	20	64200000	19	13	35	61723	insoluble protein [Pinctada fucata]
HavB	2204081	A.AAAAAAAAAGGG.V	N	26.08	828.409	12	-0.7	415.212	2	31.3	1510000	1	6281	1	200	211			123.55	20	64200000	19	13	35	61723	insoluble protein [Pinctada fucata]
HavB	2204081	A.AAAAAAAAGGGA.G	N	26.02	828.409	12	0	415.212	2	30	2580000	1	5997	1	219	230			123.55	20	64200000	19	13	35	61723	insoluble protein [Pinctada fucata]
HavB	2204081	G.AGGGAGGGAGGGAGAGAGAGA.G	Y	25.5	1327.59	21	-0.2	664.8	2	32.29	1510000	1	6497	1	119	139			123.55	20	64200000	19	13	35	61723	insoluble protein [Pinctada fucata]
HavB	2204081	L.GGGLGGGLGGLGGL(-.98).G	Y	24.73	1039.58	14	0	520.796	2	84.38	1600000	1	17721	1	152	165	Amidation	L14:Amidation:1000.00	123.55	20	64200000	19	13	35	61723	insoluble protein [Pinctada fucata]
HavB	2204081	G.SAAAAAAAAAAA.A	N	24.64	886.451	12	-0.9	444.232	2	55.97	13500000	1	11659	1	282	293			123.55	20	64200000	19	13	35	61723	insoluble protein [Pinctada fucata]
HavB	1242807640	L.GGLGGLGGLGGGLGGKGGGGMGGK(+21.98).G	Y	39.88	1848.92	24	-4.2	925.465	2	113.59	2530000	1	24142	2	122	145	Sodium adduct	K24:Sodium adduct:1000.00	114.81	46	18900000	11	10	18	12167	glycine-rich protein 23-like [CrassOstrea edulis virginica]
HavB	1242807640	L.GGLGGLGGLGGGLGGKGGGGMGGK(+226.08)G.Y	Y	37.25	2110.04	25	-1.2	1056.03	2	97.42	211000	1	20577	1	122	146	Biotinylation	K24:Biotinylation:36.43	114.81	46	18900000	11	10	18	12167	glycine-rich protein 23-like [CrassOstrea edulis virginica]
HavB	1242807640	L.GGLGGLGGLGGGLGGKGGGGMGGKG.Y	Y	37	1883.96	25	-6	942.983	2	94.59	1680000	2	20629	1	122	146			114.81	46	18900000	11	10	18	12167	glycine-rich protein 23-like [CrassOstrea edulis virginica]
HavB	1242807640	S.GLGGLGGLGGLGGGLGGK(+225.09)GGGGM.G	Y	34.63	1980	23	1.9	991.011	2	99.88	831000	1	21118	2	120	142	Iminobiotinylation	K18:Iminobiotinylation:102.21	114.81	46	18900000	11	10	18	12167	glycine-rich protein 23-like [CrassOstrea edulis virginica]
HavB	1242807640	L.GGLGGLGGLGGGLGGKGGGGMGG(+14.02).K	Y	33.7	1712.86	23	-4.6	857.435	2	85.5	917000	1	17966	2	122	144	Methylation(C-term)	G23:Methylation(C-term):1000.00	114.81	46	18900000	11	10	18	12167	glycine-rich protein 23-like [CrassOstrea edulis virginica]
HavB	1242807640	L.GGLGGLGGLGGGLGGKGGGGMGGK(+158.13)GYY	Y	28.9	2368.22	27	-2.2	1185.12	2	101.07	152000	1	21380	1	122	148	Reduced 4-Hydroxynonenal	K24:Reduced 4-Hydroxynonenal:29.57	114.81	46	18900000	11	10	18	12167	glycine-rich protein 23-like [CrassOstrea edulis virginica]
HavB	1242807640	L.GGLGGGLGGLGGGLG(-.98).S	N	27.84	1096.6	15	-0.6	549.306	2	83.45	1090000	1	17521	1	104	118	Amidation	G15:Amidation:1000.00	114.81	46	18900000	11	10	18	12167	glycine-rich protein 23-like [CrassOstrea edulis virginica]
HavB	1242807640	L.GGLGGLGGLGGGLGGKGGGGMGGK(+21.97).G	Y	27.32	1848.91	24	-2.9	925.46	2	112.5	2290000	1	23895	1	122	145	Replacement of 2 protons by magnesium	K24:Replacement of 2 protons by magnesium:1000.00	114.81	46	18900000	11	10	18	12167	glycine-rich protein 23-like [CrassOstrea edulis virginica]
HavB	1242807640	L.GGLGGGLGGLGGGLGS(+59.02)GLGG.L	Y	27.28	1527.78	20	-5.2	764.895	2	82.91	677000	1	17406	1	104	123	Aminoethylcysteine	S16:Aminoethylcysteine:1000.00	114.81	46	18900000	11	10	18	12167	glycine-rich protein 23-like [CrassOstrea edulis virginica]
HavB	1242807640	S.GLGGLGGLGGLGGGLGGKGGGGMGGK.G	Y	26.57	1997.05	26	-0.1	999.531	2	102.59	0	1	21715	1	120	145			114.81	46	18900000	11	10	18	12167	glycine-rich protein 23-like [CrassOstrea edulis virginica]
HavB	1242807640	L.GGLGGGLGGLGGGLGS(+60.00)GLGG.L	Y	25.54	1528.77	20	-6.7	765.385	2	87.59	1960000	1	18420	1	104	123	2-OH-ethyl thio-Ser	S16:2-OH-ethyl thio-Ser:1000.00	114.81	46	18900000	11	10	18	12167	glycine-rich protein 23-like [CrassOstrea edulis virginica]
HavB	1242807640	L.GGLGGLGGGLGGK(+42.01)GGGGMGGK(+14.02).G	Y	25.49	1655.84	21	-3.8	828.925	2	85.8	308000	1	18030	1	125	145	Acetylation (K); Methylation(KR)	K13:Acetylation (K):19.48;K21:Methylation(KR):19.48	114.81	46	18900000	11	10	18	12167	glycine-rich protein 23-like [CrassOstrea edulis virginica]
HavB	1242807640	K.GGGLGGLGGLGGLGGGVIMSGL(+53.97)G.G	Y	25.27	1865.93	23	1.8	933.973	2	112.5	7300000	1	23896	2	54	76	Trifluoroleucine	L22:Trifluoroleucine:10.47	114.81	46	18900000	11	10	18	12167	glycine-rich protein 23-like [CrassOstrea edulis virginica]
HavB	1242807640	L.GGLGGLGGLGGGLGGK(+226.08)GGGGM.G	Y	25.13	1810.88	21	7.1	906.455	2	94.45	0	1	19921	1	122	142	Biotinylation	K16:Biotinylation:58.90	114.81	46	18900000	11	10	18	12167	glycine-rich protein 23-like [CrassOstrea edulis virginica]
HavB	1242778523	G.GIGGGIGGGIGGGIGGGY(+31.99)YPS.Y	Y	41.23	1753.83	21	3	877.923	2	85.84	173000	1	18038	1	106	126	Dihydroxy	Y18:Dihydroxy:0.00	102.8	22	7250000	11	9	15	12789	glycine-rich cell wall structural protein-like [CrassOstrea edulis virginica]
HavB	1242778523	P.GIGGGIGGGIGGGIGGG(+14.02).I	Y	33.83	1225.64	17	1.9	613.829	2	87.45	3170000	1	18390	3	102	118	Methylation(C-term)	G17:Methylation(C-term):1000.00	102.8	22	7250000	11	9	15	12789	glycine-rich cell wall structural protein-like [CrassOstrea edulis virginica]
HavB	1242778523	G.GIGGGIGGGIGGGIGGGYYPSYGK(+298.19).R	Y	31.22	2368.21	24	-1.8	1185.11	2	101.11	152000	1	21390	1	106	129	Levuglandinyl-lysine anhyropyrrole adduct	K24:Levuglandinyl-lysine anhyropyrrole adduct:50.64	102.8	22	7250000	11	9	15	12789	glycine-rich cell wall structural protein-like [CrassOstrea edulis virginica]
HavB	1242778523	G.IGGGIGGGIGGGIGGGYY(+31.99)PS.Y	Y	30.29	1696.81	20	1.1	849.411	2	86.09	1650000	1	18093	1	107	126	Dihydroxy	Y18:Dihydroxy:0.00	102.8	22	7250000	11	9	15	12789	glycine-rich cell wall structural protein-like [CrassOstrea edulis virginica]
HavB	1242778523	G.GIGGGIGGGIGGGIGGGYYPSYGK(+41.03).R	Y	28.41	2111.04	24	-0.3	1056.53	2	97.44	81100	1	20581	1	106	129	Amidination of lysines or N-terminal amines with methyl acetimidate	K24:Amidination of lysines or N-terminal amines with methyl acetimidate:40.45	102.8	22	7250000	11	9	15	12789	glycine-rich cell wall structural protein-like [CrassOstrea edulis virginica]
HavB	1242778523	P.GIGGGIGGGIGGGIG.G	Y	27.25	1097.58	15	1.5	549.8	2	85.5	922000	2	18621	1	102	116			102.8	22	7250000	11	9	15	12789	glycine-rich cell wall structural protein-like [CrassOstrea edulis virginica]
HavB	1242778523	G.GIGGGIGGGIGGGIGGGYYPSYGKR(+54.01).S	Y	26.81	2280.13	25	5.1	1141.08	2	105.74	0	1	22408	1	106	130	Methylglyoxal-derived hydroimidazolone	R25:Methylglyoxal-derived hydroimidazolone:1000.00	102.8	22	7250000	11	9	15	12789	glycine-rich cell wall structural protein-like [CrassOstrea edulis virginica]
HavB	1242778523	G.GIGGGIGGGIGGGIGGGYYPSYGK(+70.04)R.S	Y	25.58	2296.16	25	1.8	1149.09	2	105.73	0	1	22405	1	106	130	Crotonaldehyde	K24:Crotonaldehyde:1000.00	102.8	22	7250000	11	9	15	12789	glycine-rich cell wall structural protein-like [CrassOstrea edulis virginica]
HavB	1242778523	G.GGIGGGIGGGIGGGIGGGYY(+162.08)PS.Y	Y	24.24	1940.94	22	9.4	971.486	2	94.79	335000	2	20672	1	105	126	O-Pinacolylmethylphosphonylation	Y20:O-Pinacolylmethylphosphonylation:0.00	102.8	22	7250000	11	9	15	12789	glycine-rich cell wall structural protein-like [CrassOstrea edulis virginica]
HavB	1242778523	P.GIGGGIGGGIGGGIGG.G	N	24.13	1154.6	16	1.4	578.31	2	86.94	1920000	1	18279	1	102	117			102.8	22	7250000	11	9	15	12789	glycine-rich cell wall structural protein-like [CrassOstrea edulis virginica]
HavB	1242778523	P.GIGGGIGGGIGGGI.G	N	24.06	1040.56	14	0.1	521.288	2	89.55	1420000	1	18848	1	102	115			102.8	22	7250000	11	9	15	12789	glycine-rich cell wall structural protein-like [CrassOstrea edulis virginica]
HavB	1242778523	G.GGIGGGIGGGIGGGIGGGYYPSYGK.R	Y	23.92	2127.04	25	9.3	1064.54	2	94.86	208000	1	20010	1	105	129			102.8	22	7250000	11	9	15	12789	glycine-rich cell wall structural protein-like [CrassOstrea edulis virginica]
HavB	1242778523	G.GIGGGIGGGIGGGIGGGYYP(+29.04)SYG.K	Y	23.84	1970.96	23	5.4	986.493	2	93.67	551000	1	19749	1	106	128	Dimethylation of proline residue	P20:Dimethylation of proline residue:1000.00	102.8	22	7250000	11	9	15	12789	glycine-rich cell wall structural protein-like [CrassOstrea edulis virginica]
HavB	3513512	G.GLGGGLGGGGLGGGGLGG(+14.02).G	Y	32.77	1282.66	18	1.8	642.34	2	86.22	3870000	1	18122	1	141	158	Methylation(C-term)	G18:Methylation(C-term):1000.00	100.24	9	16500000	10	10	10	77882	nongradient byssal precursor [Mytilus edulis]
HavB	3513512	L.GGLGGGLGGGGLGGG(+14.02).G	Y	32.38	1055.54	15	-0.5	528.775	2	78.74	464000	1	16511	1	140	154	Methylation(C-term)	G15:Methylation(C-term):1000.00	100.24	9	16500000	10	10	10	77882	nongradient byssal precursor [Mytilus edulis]
HavB	3513512	G.GGLGGLGGGLGGGGL.G	Y	30.34	1097.58	15	-1.4	549.798	2	87.51	4470000	1	18403	1	137	151			100.24	9	16500000	10	10	10	77882	nongradient byssal precursor [Mytilus edulis]
HavB	3513512	G.L(+71.04)GGLGGLGFGGAG.A	Y	29.63	1102.58	13	2.3	552.297	2	96.73	192000	1	20424	1	793	805	Propionamide (K X@N-term)	L1:Propionamide (K X@N-term):1000.00	100.24	9	16500000	10	10	10	77882	nongradient byssal precursor [Mytilus edulis]
HavB	3513512	G.V(+28.03)GGGLGGLGGGLGGGGL.G	Y	27.55	1281.7	17	-0.1	641.859	2	96.74	118000	1	20426	1	135	151	Ethylation	V1:Ethylation:49.53	100.24	9	16500000	10	10	10	77882	nongradient byssal precursor [Mytilus edulis]
HavB	3513512	A.GGIGGGFGGL(+53.97)GGGL.G	Y	27.23	1128.52	14	0.6	565.266	2	67.66	1010000	1	14149	1	767	780	Trifluoroleucine	L10:Trifluoroleucine:80.00	100.24	9	16500000	10	10	10	77882	nongradient byssal precursor [Mytilus edulis]
HavB	3513512	G.LGGGGLGGGLGGLLGGGGGGGGLGS(+42.01)AG.A	Y	26.56	1980	27	1.4	991.01	2	99.97	477000	1	21138	1	161	187	Acetylation (TSCYH)	S25:Acetylation (TSCYH):1000.00	100.24	9	16500000	10	10	10	77882	nongradient byssal precursor [Mytilus edulis]
HavB	3513512	G.LGGGGLGGGGLGGGL.G	Y	25.54	1097.58	15	-0.6	549.798	2	86.98	4470000	1	18289	1	156	170			100.24	9	16500000	10	10	10	77882	nongradient byssal precursor [Mytilus edulis]
HavB	3513512	G.G(+71.04)LGGLGFGGAG.A	Y	24.78	932.472	11	-0.1	467.243	2	86.32	403000	1	18143	1	795	805	Propionamide (K X@N-term)	G1:Propionamide (K X@N-term):1000.00	100.24	9	16500000	10	10	10	77882	nongradient byssal precursor [Mytilus edulis]
HavB	3513512	A.GGIGGGFGGL(+53.97)GGGLGGL.G	Y	24.2	1355.64	17	2.1	678.831	2	79.26	1000000	1	16620	1	767	783	Trifluoroleucine	L10:Trifluoroleucine:14.19	100.24	9	16500000	10	10	10	77882	nongradient byssal precursor [Mytilus edulis]
HavB	1139852591	G.A(+43.01)GFGGGAGFGGGAGFGA.G	Y	31.57	1356.58	17	-0.8	679.299	2	88.79	203000	1	18683	1	71	87	Carbamylation	A1:Carbamylation:1000.00	91.28	17	14400000	8	8	8	11980	PREDICTED: glycine-rich cell wall structural protein 1.8-like partial [CrassOstrea edulis gigas]
HavB	1139852591	L.GGGAGFGGGAGFGGG(+14.02).A	Y	30.98	1095.47	15	-0.6	548.744	2	75.6	5430000	1	15843	1	68	82	Methylation(C-term)	G15:Methylation(C-term):1000.00	91.28	17	14400000	8	8	8	11980	PREDICTED: glycine-rich cell wall structural protein 1.8-like partial [CrassOstrea edulis gigas]
HavB	1139852591	G.GAGFGGGAGFGAGA.G	Y	29.97	1052.47	14	1.6	527.242	2	75.97	3220000	1	15921	1	76	89			91.28	17	14400000	8	8	8	11980	PREDICTED: glycine-rich cell wall structural protein 1.8-like partial [CrassOstrea edulis gigas]
HavB	1139852591	G.A(+43.01)GFGGGAGFGGGA.G	Y	28.57	1024.44	13	0.6	513.226	2	66.17	1620000	1	13833	1	71	83	Carbamylation	A1:Carbamylation:1000.00	91.28	17	14400000	8	8	8	11980	PREDICTED: glycine-rich cell wall structural protein 1.8-like partial [CrassOstrea edulis gigas]
HavB	1139852591	G.A(+43.01)GFGGGAGFGA.G	Y	25.17	910.393	11	-0.2	456.204	2	75.74	374000	1	15871	1	77	87	Carbamylation	A1:Carbamylation:1000.00	91.28	17	14400000	8	8	8	11980	PREDICTED: glycine-rich cell wall structural protein 1.8-like partial [CrassOstrea edulis gigas]
HavB	1139852591	L.G(+71.04)GGAGFGGGAGFGGGAGFGAG.A	Y	24.71	1612.7	21	0.1	807.358	2	88.71	122000	1	18666	1	68	88	Propionamide (K X@N-term)	G1:Propionamide (K X@N-term):1000.00	91.28	17	14400000	8	8	8	11980	PREDICTED: glycine-rich cell wall structural protein 1.8-like partial [CrassOstrea edulis gigas]
HavB	1139852591	L.GGGAGFGGGAGFGGGA.G	Y	24.41	1152.49	16	-0.3	577.255	2	74.25	558000	1	15560	1	68	83			91.28	17	14400000	8	8	8	11980	PREDICTED: glycine-rich cell wall structural protein 1.8-like partial [CrassOstrea edulis gigas]
HavB	1139852591	G.G(+43.01)AGFGGGAGFGA.G	Y	24.12	967.415	12	-1.7	484.714	2	75.22	2860000	1	15763	1	76	87	Carbamylation	G1:Carbamylation:1000.00	91.28	17	14400000	8	8	8	11980	PREDICTED: glycine-rich cell wall structural protein 1.8-like partial [CrassOstrea edulis gigas]
HavB	762085796	G.A(+43.01)GFGGGAGFGGGAGFGA.G	Y	31.57	1356.58	17	-0.8	679.299	2	88.79	203000	1	18683	1	173	189	Carbamylation	A1:Carbamylation:1000.00	91.28	9	14400000	8	8	8	22314	PREDICTED: glycine-rich cell wall structural protein 2-like [CrassOstrea edulis gigas]
HavB	762085796	L.GGGAGFGGGAGFGGG(+14.02).A	Y	30.98	1095.47	15	-0.6	548.744	2	75.6	5430000	1	15843	1	170	184	Methylation(C-term)	G15:Methylation(C-term):1000.00	91.28	9	14400000	8	8	8	22314	PREDICTED: glycine-rich cell wall structural protein 2-like [CrassOstrea edulis gigas]
HavB	762085796	G.GAGFGGGAGFGAGA.G	Y	29.97	1052.47	14	1.6	527.242	2	75.97	3220000	1	15921	1	178	191			91.28	9	14400000	8	8	8	22314	PREDICTED: glycine-rich cell wall structural protein 2-like [CrassOstrea edulis gigas]
HavB	762085796	G.A(+43.01)GFGGGAGFGGGA.G	Y	28.57	1024.44	13	0.6	513.226	2	66.17	1620000	1	13833	1	173	185	Carbamylation	A1:Carbamylation:1000.00	91.28	9	14400000	8	8	8	22314	PREDICTED: glycine-rich cell wall structural protein 2-like [CrassOstrea edulis gigas]
HavB	762085796	G.A(+43.01)GFGGGAGFGA.G	Y	25.17	910.393	11	-0.2	456.204	2	75.74	374000	1	15871	1	179	189	Carbamylation	A1:Carbamylation:1000.00	91.28	9	14400000	8	8	8	22314	PREDICTED: glycine-rich cell wall structural protein 2-like [CrassOstrea edulis gigas]
HavB	762085796	L.G(+71.04)GGAGFGGGAGFGGGAGFGAG.A	Y	24.71	1612.7	21	0.1	807.358	2	88.71	122000	1	18666	1	170	190	Propionamide (K X@N-term)	G1:Propionamide (K X@N-term):1000.00	91.28	9	14400000	8	8	8	22314	PREDICTED: glycine-rich cell wall structural protein 2-like [CrassOstrea edulis gigas]
HavB	762085796	L.GGGAGFGGGAGFGGGA.G	Y	24.41	1152.49	16	-0.3	577.255	2	74.25	558000	1	15560	1	170	185			91.28	9	14400000	8	8	8	22314	PREDICTED: glycine-rich cell wall structural protein 2-like [CrassOstrea edulis gigas]
HavB	762085796	G.G(+43.01)AGFGGGAGFGA.G	Y	24.12	967.415	12	-1.7	484.714	2	75.22	2860000	1	15763	1	178	189	Carbamylation	G1:Carbamylation:1000.00	91.28	9	14400000	8	8	8	22314	PREDICTED: glycine-rich cell wall structural protein 2-like [CrassOstrea edulis gigas]
HavB	987895014	S.AAAAAAAAAAAS(+114.04)R.R	N	30.04	1156.59	13	-0.4	579.304	2	49.18	734000	1	10213	1	58	70	Ubiquitin	S12:Ubiquitin:1000.00	84.57	16	1890000	6	2	7	44731	MSI60-related protein partial [BathyModiolus modiolus platifrons]
HavB	987895014	A.AAAAAAAAASR.R	N	29.64	900.478	11	-0.2	451.246	2	22.71	4230000	1	4403	1	60	70			84.57	16	1890000	6	2	7	44731	MSI60-related protein partial [BathyModiolus modiolus platifrons]
HavB	987895014	G.GSGSGGSGGFGGS(-15.99)GGSGGSGGIQLYSYGSK.S	Y	27.54	2509.11	30	-7.2	837.371	3	60.1	793000	1	12538	2	486	515	Deoxy	S13:Deoxy:0.00	84.57	16	1890000	6	2	7	44731	MSI60-related protein partial [BathyModiolus modiolus platifrons]
HavB	987895014	A.GAGAGAGAGAGAGA.G	N	26.6	914.42	14	0.4	458.218	2	26.28	2250000	1	5182	1	459	472			84.57	16	1890000	6	2	7	44731	MSI60-related protein partial [BathyModiolus modiolus platifrons]
HavB	987895014	A.A(+43.01)AAGAGAGGAGGAGGA.A	Y	25.36	1085.48	16	0.1	543.75	2	26.46	1100000	1	5223	1	21	36	Carbamylation	A1:Carbamylation:1000.00	84.57	16	1890000	6	2	7	44731	MSI60-related protein partial [BathyModiolus modiolus platifrons]
HavB	987895014	G.SAAAAAAAAAAA.G	N	24.64	886.451	12	-0.9	444.232	2	55.97	13500000	1	11659	1	12	23			84.57	16	1890000	6	2	7	44731	MSI60-related protein partial [BathyModiolus modiolus platifrons]
HavB	961112486	A.SAAAAAAAAAAAAAV(-.98).N	Y	32.85	1126.61	15	1.9	564.313	2	84.77	200000	1	17805	1	71	85	Amidation	V15:Amidation:1000.00	81.81	5	10400000	6	5	6	50951	PREDICTED: transcription factor hamlet-like partial [Octopus bimaculoides]
HavB	961112486	A.SAAAAAAAAAAAAAVN(+.98)SAVGARTGTVT.S	Y	29.07	2243.15	27	3	1122.59	2	111.72	0	1	23729	1	71	97	Deamidation (NQ)	N16:Deamidation (NQ):1000.00	81.81	5	10400000	6	5	6	50951	PREDICTED: transcription factor hamlet-like partial [Octopus bimaculoides]
HavB	961112486	A.SAAAAAAAAAAAAAVN.S	Y	28.65	1241.64	16	0	621.825	2	86.79	420000	1	18246	1	71	86			81.81	5	10400000	6	5	6	50951	PREDICTED: transcription factor hamlet-like partial [Octopus bimaculoides]
HavB	961112486	A.AAAAAAVN(+.98)SAVGA.R	Y	27.31	1043.52	13	-0.1	522.769	2	31.6	2570000	1	6347	1	79	91	Deamidation (NQ)	N8:Deamidation (NQ):1000.00	81.81	5	10400000	6	5	6	50951	PREDICTED: transcription factor hamlet-like partial [Octopus bimaculoides]
HavB	961112486	A.SAAAAAAAAAAA.A	N	24.64	886.451	12	-0.9	444.232	2	55.97	13500000	1	11659	1	71	82			81.81	5	10400000	6	5	6	50951	PREDICTED: transcription factor hamlet-like partial [Octopus bimaculoides]
HavB	961112486	A.AAAAAVN(+.98)SAVGA.R	Y	24.25	972.488	12	0.2	487.251	2	25.62	7230000	1	5038	1	80	91	Deamidation (NQ)	N7:Deamidation (NQ):1000.00	81.81	5	10400000	6	5	6	50951	PREDICTED: transcription factor hamlet-like partial [Octopus bimaculoides]
HavB	1227052546	R.DVVGSGVSAAISAR.G	Y	36.74	1287.68	14	-3.8	644.844	2	72.16	3380000	1	15108	1	209	222			78.93	10	22400000	3	3	3	29828	nasilin 1 [Hyriopsis cumingii]
HavB	1227052546	R.GNAAANAVGAR.V	Y	33.7	970.494	11	0.1	486.255	2	26.68	13600000	1	5270	1	223	233			78.93	10	22400000	3	3	3	29828	nasilin 1 [Hyriopsis cumingii]
HavB	1227052546	R.GHAVSTPR.G	Y	28.62	823.43	8	-0.2	412.722	2	17.73	5460000	1	3320	1	77	84			78.93	10	22400000	3	3	3	29828	nasilin 1 [Hyriopsis cumingii]
HavB	1227052548	R.DVVGSGVSAAISAR.G	Y	36.74	1287.68	14	-3.8	644.844	2	72.16	3380000	1	15108	1	209	222			78.93	10	22400000	3	3	3	30230	nasilin 2 [Hyriopsis cumingii]
HavB	1227052548	R.GNAAANAVGAR.V	Y	33.7	970.494	11	0.1	486.255	2	26.68	13600000	1	5270	1	223	233			78.93	10	22400000	3	3	3	30230	nasilin 2 [Hyriopsis cumingii]
HavB	1227052548	R.GHAVSTPR.G	Y	28.62	823.43	8	-0.2	412.722	2	17.73	5460000	1	3320	1	77	84			78.93	10	22400000	3	3	3	30230	nasilin 2 [Hyriopsis cumingii]
HavB	729057562	R.DVVGSGVSAAISAR.G	Y	36.74	1287.68	14	-3.8	644.844	2	72.16	3380000	1	15108	1	209	222			78.93	10	22400000	3	3	3	30895	silkmapin [Hyriopsis cumingii]
HavB	729057562	R.GNAAANAVGAR.V	Y	33.7	970.494	11	0.1	486.255	2	26.68	13600000	1	5270	1	223	233			78.93	10	22400000	3	3	3	30895	silkmapin [Hyriopsis cumingii]
HavB	729057562	R.GHAVSTPR.G	Y	28.62	823.43	8	-0.2	412.722	2	17.73	5460000	1	3320	1	77	84			78.93	10	22400000	3	3	3	30895	silkmapin [Hyriopsis cumingii]
HavB	906541721	G.SAAAAAAAAAAAAGGL(+17.03).G	Y	28.82	1201.64	16	0.1	601.828	2	83.85	274000	1	17607	1	329	344	Replacement of proton with ammonium ion	L16:Replacement of proton with ammonium ion:1000.00	72.95	8	1500000	5	4	6	30657	GAL-rich protein partial [Mytilus coruscus]
HavB	906541721	L.A(+43.01)LFGGGVGAGGSAAAAA.A	Y	28.57	1346.66	17	1.6	674.337	2	84.52	330000	1	17751	1	318	334	Carbamylation	A1:Carbamylation:1000.00	72.95	8	1500000	5	4	6	30657	GAL-rich protein partial [Mytilus coruscus]
HavB	906541721	L.A(+43.01)LFGGGVGAGGSAAAA.A	Y	27.96	1275.62	16	-0.4	638.817	2	83.97	195000	1	17633	1	318	333	Carbamylation	A1:Carbamylation:1000.00	72.95	8	1500000	5	4	6	30657	GAL-rich protein partial [Mytilus coruscus]
HavB	906541721	L.A(+43.01)LFGGGVGAGGSAAAAAA.A	Y	27.71	1417.69	18	0.8	709.855	2	85.22	221000	1	17904	1	318	335	Carbamylation	A1:Carbamylation:1000.00	72.95	8	1500000	5	4	6	30657	GAL-rich protein partial [Mytilus coruscus]
HavB	906541721	G.SAAAAAAAAAAAAGGL.G	Y	26.91	1184.61	16	1.8	593.316	2	83.76	483000	1	17588	1	329	344			72.95	8	1500000	5	4	6	30657	GAL-rich protein partial [Mytilus coruscus]
HavB	906541721	G.SAAAAAAAAAAA.A	N	24.64	886.451	12	-0.9	444.232	2	55.97	13500000	1	11659	1	329	340			72.95	8	1500000	5	4	6	30657	GAL-rich protein partial [Mytilus coruscus]
HavB	1242787169	N.AAAAAAAAAAS(-18.01)GSNGF.I	Y	27.59	1259.59	16	0.2	630.802	2	48.34	2810000	1	10032	1	247	262	Dehydration	S11:Dehydration:5.99	70.03	23	9270000	4	4	4	26862	antifreeze protein Maxi-like [CrassOstrea edulis virginica]
HavB	1242787169	A.AAAAAAAASGRQ.G	Y	26.35	1014.52	12	0.9	508.268	2	25.23	4920000	1	4953	1	65	76			70.03	23	9270000	4	4	4	26862	antifreeze protein Maxi-like [CrassOstrea edulis virginica]
HavB	1242787169	A.AAAAAAASQQS(+87.05)ATAAAAAAASRNA.A	Y	25.62	2130.06	24	-1.5	711.026	3	88.54	438000	1	18628	1	122	145	Phosphorylation to amine thiol	S11:Phosphorylation to amine thiol:5.77	70.03	23	9270000	4	4	4	26862	antifreeze protein Maxi-like [CrassOstrea edulis virginica]
HavB	1242787169	P.Y(+162.05)PVVPQIGGLGGSAA.A	Y	25.21	1546.79	15	-2.2	774.399	2	78.88	1100000	1	16541	1	108	122	Hexose (NSY)	Y1:Hexose (NSY):30.61	70.03	23	9270000	4	4	4	26862	antifreeze protein Maxi-like [CrassOstrea edulis virginica]
HavB	556095266	R.KLEDDEKV.E	Y	29.31	974.492	8	-0.4	488.253	2	28.64	153000000	1	5697	4	264	271			52.86	4	264000000	2	2	5	31811	hypothetical protein LOTGIDRAFT_107918 [Lottia gigantea]
HavB	556095266	E.KE(sub R)KLEDDEKV.E	Y	24.16	1231.63	10	-0.4	616.822	2	25.61	111000000	1	5036	1	262	271			52.86	4	264000000	2	2	5	31811	hypothetical protein LOTGIDRAFT_107918 [Lottia gigantea]
HavB	676489774	R.KLEDDEKV.E	Y	29.31	974.492	8	-0.4	488.253	2	28.64	153000000	1	5697	4	264	271			52.86	4	264000000	2	2	5	31811	hypothetical protein LOTGIDRAFT_107918 [Lottia gigantea]
HavB	676489774	E.KE(sub R)KLEDDEKV.E	Y	24.16	1231.63	10	-0.4	616.822	2	25.61	111000000	1	5036	1	262	271			52.86	4	264000000	2	2	5	31811	hypothetical protein LOTGIDRAFT_107918 [Lottia gigantea]
HavB	1207977276	D.KDKKKEEKKS.F	Y	29.23	1246.72	10	1.3	624.37	2	15.33	3870000	1	2796	2	839	848			49.2	1	5400000	2	2	3	109562	multiple C2 and transmembrane domain-containing protein 1-like isoform X5 [Mizuhopecten yessoensis]
HavB	1207977276	D.DKDKKKEEKKS.F	Y	26.31	1361.75	11	1.9	681.884	2	14.94	1530000	1	2709	1	838	848			49.2	1	5400000	2	2	3	109562	multiple C2 and transmembrane domain-containing protein 1-like isoform X5 [Mizuhopecten yessoensis]
HavB	1207977272	D.KDKKKEEKKS.F	Y	29.23	1246.72	10	1.3	624.37	2	15.33	3870000	1	2796	2	845	854			49.2	1	5400000	2	2	3	110274	multiple C2 and transmembrane domain-containing protein 1-like isoform X3 [Mizuhopecten yessoensis]
HavB	1207977272	D.DKDKKKEEKKS.F	Y	26.31	1361.75	11	1.9	681.884	2	14.94	1530000	1	2709	1	844	854			49.2	1	5400000	2	2	3	110274	multiple C2 and transmembrane domain-containing protein 1-like isoform X3 [Mizuhopecten yessoensis]
HavC	1176704634	I.DC(+57.02)EEDDN(+.98)GKYYKRVV.K	Y	48.29	1889.81	15	-2.1	945.91	2	55.35	560000000	2	11361	17	834	848	Carbamidomethylation; Deamidation (NQ)	C2:Carbamidomethylation:1000.00;N7:Deamidation (NQ):1000.00	251.94	55	10100000000	260	255	929	73702	Hic74 [Hyriopsis cumingii]
HavC	1176704634	I.DC(+57.02)EEDDNGKYYKRVV.K	Y	47.26	1888.83	15	-1.2	945.419	2	52.25	131000000	2	10701	4	834	848	Carbamidomethylation	C2:Carbamidomethylation:1000.00	251.94	55	10100000000	260	255	929	73702	Hic74 [Hyriopsis cumingii]
HavC	1176704634	I.DC(+57.02)EEDDN(-17.03)GKYYKRVV.K	Y	46.36	1871.8	15	-2.6	936.905	2	52.96	0	2	10853	1	834	848	Carbamidomethylation; Ammonia-loss (N)	C2:Carbamidomethylation:1000.00;N7:Ammonia-loss (N):1000.00	251.94	55	10100000000	260	255	929	73702	Hic74 [Hyriopsis cumingii]
HavC	1176704634	I.WKKIDC(+57.02)EEDDN(+.98)GKYY.K	Y	46.04	1962.83	15	0.5	982.423	2	57.85	7850000	2	11892	6	830	844	Carbamidomethylation; Deamidation (NQ)	C6:Carbamidomethylation:1000.00;N11:Deamidation (NQ):1000.00	251.94	55	10100000000	260	255	929	73702	Hic74 [Hyriopsis cumingii]
HavC	1176704634	K.KIDC(+57.02)EEDDN(+.98)GKYYK.R	Y	45.39	1776.75	14	-1.3	889.382	2	37.9	110000000	2	7605	23	832	845	Carbamidomethylation; Deamidation (NQ)	C4:Carbamidomethylation:1000.00;N9:Deamidation (NQ):1000.00	251.94	55	10100000000	260	255	929	73702	Hic74 [Hyriopsis cumingii]
HavC	1176704634	R.SYAAAAAAAAAAAGGDGDALAASAAR(+15.99).R	Y	44.63	2178.03	26	-0.9	727.017	3	79.62	3090000	2	16604	2	720	745	Oxidation or Hydroxylation	R26:Oxidation or Hydroxylation:40.94	251.94	55	10100000000	260	255	929	73702	Hic74 [Hyriopsis cumingii]
HavC	1176704634	C.EEDDN(-17.03)GKYYKRVV.K	Y	44.02	1596.74	13	-1	799.377	2	59.05	7660000	2	12149	3	836	848	Ammonia-loss (N)	N5:Ammonia-loss (N):1000.00	251.94	55	10100000000	260	255	929	73702	Hic74 [Hyriopsis cumingii]
HavC	1176704634	I.DC(+57.02)EEDDN(+.98)GKYYKRV.V	Y	43.76	1790.74	14	0.7	896.379	2	46.61	227000000	2	9504	20	834	847	Carbamidomethylation; Deamidation (NQ)	C2:Carbamidomethylation:1000.00;N7:Deamidation (NQ):1000.00	251.94	55	10100000000	260	255	929	73702	Hic74 [Hyriopsis cumingii]
HavC	1176704634	K.KIDC(+57.02)EEDDN(+.98)GKYY.K	Y	42.65	1648.66	13	-1.1	825.335	2	52.61	8240000	2	10780	6	832	844	Carbamidomethylation; Deamidation (NQ)	C4:Carbamidomethylation:1000.00;N9:Deamidation (NQ):1000.00	251.94	55	10100000000	260	255	929	73702	Hic74 [Hyriopsis cumingii]
HavC	1176704634	A.AAAAEVVDEFGIGALAGA(+28.03).G	Y	42.55	1658.85	18	6.5	830.438	2	89.48	23700000	1	18916	10	91	108	Ethylation	A18:Ethylation:79.61	251.94	55	10100000000	260	255	929	73702	Hic74 [Hyriopsis cumingii]
HavC	1176704634	K.IDC(+57.02)EEDDN(+.98)GKYYKRV.V	Y	42.5	1903.83	15	0.7	952.921	2	50.95	6190000	2	10424	5	833	847	Carbamidomethylation; Deamidation (NQ)	C3:Carbamidomethylation:1000.00;N8:Deamidation (NQ):1000.00	251.94	55	10100000000	260	255	929	73702	Hic74 [Hyriopsis cumingii]
HavC	1176704634	A.AAAEVVDEFGIGALAGA(+28.03).G	Y	42.49	1587.81	17	6.7	794.92	2	87.33	40800000	1	18450	10	92	108	Ethylation	A17:Ethylation:94.67	251.94	55	10100000000	260	255	929	73702	Hic74 [Hyriopsis cumingii]
HavC	1176704634	A.AAAAAEVVDEFGIGALAGA(+28.03).G	Y	42.35	1729.89	19	5.9	577.64	3	90.98	10700000	1	19243	15	90	108	Ethylation	A19:Ethylation:62.82	251.94	55	10100000000	260	255	929	73702	Hic74 [Hyriopsis cumingii]
HavC	1176704634	I.DC(+57.02)EEDDNGKYYK.R	Y	42.28	1534.59	12	0.2	768.302	2	30.56	22700000	2	6025	2	834	845	Carbamidomethylation	C2:Carbamidomethylation:1000.00	251.94	55	10100000000	260	255	929	73702	Hic74 [Hyriopsis cumingii]
HavC	1176704634	A.AAAAAAAEVVDEFGIGALAGA(+28.03).G	Y	42.06	1871.96	21	2.8	624.997	3	94.61	2980000	1	20036	6	88	108	Ethylation	A21:Ethylation:59.43	251.94	55	10100000000	260	255	929	73702	Hic74 [Hyriopsis cumingii]
HavC	1176704634	A.AAEVVDEFGIGALAGA(+28.03).G	Y	42.05	1516.78	16	7.7	759.402	2	85.75	27500000	1	18102	10	93	108	Ethylation	A16:Ethylation:114.67	251.94	55	10100000000	260	255	929	73702	Hic74 [Hyriopsis cumingii]
HavC	1176704634	A.G(+87.03)GSGGSGGSGGSGGSGQRDK.V	Y	41.57	1694.72	20	-6.7	848.362	2	18.11	5820000	2	3383	2	805	824	Glycidamide adduct	G1:Glycidamide adduct:240.12	251.94	55	10100000000	260	255	929	73702	Hic74 [Hyriopsis cumingii]
HavC	1176704634	A.AEVVDEFGIGALAGA(+28.03).G	Y	41.43	1445.74	15	7.8	723.883	2	85.39	15600000	1	18024	6	94	108	Ethylation	A15:Ethylation:106.84	251.94	55	10100000000	260	255	929	73702	Hic74 [Hyriopsis cumingii]
HavC	1176704634	K.IDC(+57.02)EEDDN(+.98)GKYYK.R	Y	40.76	1648.66	13	0.3	825.336	2	47.99	185000000	2	9795	33	833	845	Carbamidomethylation; Deamidation (NQ)	C3:Carbamidomethylation:1000.00;N8:Deamidation (NQ):1000.00	251.94	55	10100000000	260	255	929	73702	Hic74 [Hyriopsis cumingii]
HavC	1176704634	K.KIDC(+57.02)EEDDN(+.98)GKY.Y	Y	40.59	1485.59	12	1.8	743.805	2	35.77	14200000	2	7135	4	832	843	Carbamidomethylation; Deamidation (NQ)	C4:Carbamidomethylation:1000.00;N9:Deamidation (NQ):1000.00	251.94	55	10100000000	260	255	929	73702	Hic74 [Hyriopsis cumingii]
HavC	1176704634	K.KIDC(+57.02)EEDDN(-17.03)GK.Y	Y	40.32	1304.52	11	-0.5	653.266	2	19.41	11200000	2	3659	3	832	842	Carbamidomethylation; Ammonia-loss (N)	C4:Carbamidomethylation:1000.00;N9:Ammonia-loss (N):1000.00	251.94	55	10100000000	260	255	929	73702	Hic74 [Hyriopsis cumingii]
HavC	1176704634	A.SVLGDVDGLGGLS.A	Y	40.32	1187.6	13	-0.2	1188.61	1	93.47	106000000	1	19787	9	124	136			251.94	55	10100000000	260	255	929	73702	Hic74 [Hyriopsis cumingii]
HavC	1176704634	A.SVLGDVDGLGGLSALGLG.G	Y	40.18	1598.85	18	-0.7	800.433	2	111.78	1110000	1	23847	2	124	141			251.94	55	10100000000	260	255	929	73702	Hic74 [Hyriopsis cumingii]
HavC	1176704634	K.KIDC(+57.02)EEDDN(+.98)GK.Y	Y	39.66	1322.53	11	-0.5	662.272	2	19.3	1010000000	2	3635	17	832	842	Carbamidomethylation; Deamidation (NQ)	C4:Carbamidomethylation:1000.00;N9:Deamidation (NQ):1000.00	251.94	55	10100000000	260	255	929	73702	Hic74 [Hyriopsis cumingii]
HavC	1176704634	K.KIDC(+57.02)EEDDN(+.98)GKYYKR.V	Y	39.59	1932.85	15	-3.7	967.43	2	31.6	20100000	2	6244	4	832	846	Carbamidomethylation; Deamidation (NQ)	C4:Carbamidomethylation:1000.00;N9:Deamidation (NQ):1000.00	251.94	55	10100000000	260	255	929	73702	Hic74 [Hyriopsis cumingii]
HavC	1176704634	E.EDDN(+.98)GKYYKRVV.K	Y	39.45	1485.71	12	1.6	743.864	2	50.19	7940000	2	10262	4	837	848	Deamidation (NQ)	N4:Deamidation (NQ):1000.00	251.94	55	10100000000	260	255	929	73702	Hic74 [Hyriopsis cumingii]
HavC	1176704634	I.DC(+57.02)EEDDNGKYYKRV.V	Y	39.44	1789.76	14	1.4	895.887	2	38.91	21900000	2	7821	4	834	847	Carbamidomethylation	C2:Carbamidomethylation:1000.00	251.94	55	10100000000	260	255	929	73702	Hic74 [Hyriopsis cumingii]
HavC	1176704634	A.AAAAAAAAEVVDEFGIGALAGA(+28.03).G	Y	39.42	1943	22	6.4	648.678	3	98.29	1470000	1	20845	5	87	108	Ethylation	A22:Ethylation:74.48	251.94	55	10100000000	260	255	929	73702	Hic74 [Hyriopsis cumingii]
HavC	1176704634	I.DC(+57.02)EEDDN(+.98)GKYYK.R	Y	39.08	1535.57	12	-0.5	768.793	2	35.79	67300000	2	7141	12	834	845	Carbamidomethylation; Deamidation (NQ)	C2:Carbamidomethylation:1000.00;N7:Deamidation (NQ):1000.00	251.94	55	10100000000	260	255	929	73702	Hic74 [Hyriopsis cumingii]
HavC	1176704634	R.A(+43.01)AAAAAAAAAAAAIR.N	Y	38.9	1253.68	15	-4.2	627.847	2	98.54	2700000	2	20837	1	748	762	Carbamylation	A1:Carbamylation:1000.00	251.94	55	10100000000	260	255	929	73702	Hic74 [Hyriopsis cumingii]
HavC	1176704634	G.GSGGSGGSGGSGGSGQRDK.V	Y	38.67	1550.67	19	-8	776.335	2	17.97	5600000	2	3352	2	806	824			251.94	55	10100000000	260	255	929	73702	Hic74 [Hyriopsis cumingii]
HavC	1176704634	A.SVLGDVDGLGGLSALGLG(+17.03).G	Y	38.57	1615.88	18	-0.3	808.946	2	111.13	909000	1	23704	2	124	141	Replacement of proton with ammonium ion	G18:Replacement of proton with ammonium ion:37.64	251.94	55	10100000000	260	255	929	73702	Hic74 [Hyriopsis cumingii]
HavC	1176704634	I.DC(+57.02)EEDDNGK(+43.99)YYKRVV.K	Y	38.44	1932.82	15	-1.8	967.413	2	64.16	480000	2	13238	1	834	848	Carbamidomethylation; Carboxylation (DKW)	C2:Carbamidomethylation:1000.00;K9:Carboxylation (DKW):13.03	251.94	55	10100000000	260	255	929	73702	Hic74 [Hyriopsis cumingii]
HavC	1176704634	A.GGSGGSGGSGGSGGSGQRDK.V	Y	38.31	1607.69	20	-7.5	804.845	2	18	4910000	2	3358	2	805	824			251.94	55	10100000000	260	255	929	73702	Hic74 [Hyriopsis cumingii]
HavC	1176704634	K.KIDC(+57.02)EEDDNGK.Y	Y	38.26	1321.55	11	-1	661.779	2	16.44	35400000	1	3042	2	832	842	Carbamidomethylation	C4:Carbamidomethylation:1000.00	251.94	55	10100000000	260	255	929	73702	Hic74 [Hyriopsis cumingii]
HavC	1176704634	A.SVLGDVDGLGGLSALGLGG(-.98).G	Y	37.97	1654.89	19	-1.4	828.451	2	109.49	82100	1	23338	1	124	142	Amidation	G19:Amidation:1000.00	251.94	55	10100000000	260	255	929	73702	Hic74 [Hyriopsis cumingii]
HavC	1176704634	K.KIDC(+57.02)EEDDN(+.98)GKYYKRV.V	Y	37.95	2031.92	16	-1.4	678.313	3	47.39	2580000	2	9669	2	832	847	Carbamidomethylation; Deamidation (NQ)	C4:Carbamidomethylation:1000.00;N9:Deamidation (NQ):1000.00	251.94	55	10100000000	260	255	929	73702	Hic74 [Hyriopsis cumingii]
HavC	1176704634	A.SVLGDVDGLGGLSALGL(+17.03).G	Y	37.73	1558.86	17	0.3	780.436	2	111.8	491000	1	23850	1	124	140	Replacement of proton with ammonium ion	L17:Replacement of proton with ammonium ion:31.91	251.94	55	10100000000	260	255	929	73702	Hic74 [Hyriopsis cumingii]
HavC	1176704634	A.SVLGDVDGLGGLSALGLGG.G	Y	37.71	1655.87	19	-1.6	828.942	2	110.23	126000	1	23502	1	124	142			251.94	55	10100000000	260	255	929	73702	Hic74 [Hyriopsis cumingii]
HavC	1176704634	S.GGSGGSGGSGGSGQG(sub R)DKVQEEI.W	Y	37.48	1905.83	22	-1.4	953.921	2	50.55	1140000	2	10339	1	808	829			251.94	55	10100000000	260	255	929	73702	Hic74 [Hyriopsis cumingii]
HavC	1176704634	I.D(+31.97)C(+57.02)EEDDNGKYYKRVV.K	Y	37.33	1920.8	15	-0.1	641.273	3	51.71	12700000	1	10758	1	834	848	Persulfide; Carbamidomethylation	D1:Persulfide:52.34;C2:Carbamidomethylation:1000.00	251.94	55	10100000000	260	255	929	73702	Hic74 [Hyriopsis cumingii]
HavC	1176704634	I.WKKIDC(+57.02)EEDDN(+.98)GKYYK.R	Y	37.29	2090.93	16	-0.7	697.982	3	50.56	1270000	2	10341	1	830	845	Carbamidomethylation; Deamidation (NQ)	C6:Carbamidomethylation:1000.00;N11:Deamidation (NQ):1000.00	251.94	55	10100000000	260	255	929	73702	Hic74 [Hyriopsis cumingii]
HavC	1176704634	V.Q(-17.03)EEIWKKI.D	Y	37.23	1055.57	8	1.4	528.79	2	75.71	79400000	1	15928	7	826	833	Pyro-glu from Q	Q1:Pyro-glu from Q:1000.00	251.94	55	10100000000	260	255	929	73702	Hic74 [Hyriopsis cumingii]
HavC	1176704634	K.KIDC(+57.02)EEDDN(+.98)GKYYKRVV.K	Y	37.2	2130.99	17	-1.9	711.336	3	53.11	5010000	2	10885	3	832	848	Carbamidomethylation; Deamidation (NQ)	C4:Carbamidomethylation:1000.00;N9:Deamidation (NQ):1000.00	251.94	55	10100000000	260	255	929	73702	Hic74 [Hyriopsis cumingii]
HavC	1176704634	I.WKKIDC(+57.02)EEDDN(+.98)GK.Y	Y	36.93	1636.7	13	-1.9	819.358	2	31.68	0	2	6262	1	830	842	Carbamidomethylation; Deamidation (NQ)	C6:Carbamidomethylation:1000.00;N11:Deamidation (NQ):1000.00	251.94	55	10100000000	260	255	929	73702	Hic74 [Hyriopsis cumingii]
HavC	1176704634	G.SGGSGGSGGSGQG(sub R)DKVQEEI.W	Y	36.84	1791.79	20	-0.3	896.901	2	48.09	1890000	1	9969	1	810	829			251.94	55	10100000000	260	255	929	73702	Hic74 [Hyriopsis cumingii]
HavC	1176704634	G.AGAA(sub G)AGAGGAGALGLASVLGDVDGL.G	Y	36.82	2010.04	25	-0.9	1006.03	2	111.64	0	1	23816	1	108	132			251.94	55	10100000000	260	255	929	73702	Hic74 [Hyriopsis cumingii]
HavC	1176704634	A.AAGGDGDALAASAAR(+15.99).R	Y	36.81	1288.6	15	-2.3	645.306	2	39.89	7460000	1	8174	7	731	745	Oxidation or Hydroxylation	R15:Oxidation or Hydroxylation:75.39	251.94	55	10100000000	260	255	929	73702	Hic74 [Hyriopsis cumingii]
HavC	1176704634	G.SGGSGGSGQG(sub R)DKVQ(+.98)EEIWK.K	Y	36.66	1905.87	19	0.2	953.943	2	60.18	873000	2	12388	2	813	831	Deamidation (NQ)	Q14:Deamidation (NQ):115.97	251.94	55	10100000000	260	255	929	73702	Hic74 [Hyriopsis cumingii]
HavC	1176704634	R.DKVQEEIWKKI.D	Y	36.66	1414.78	11	-1	708.398	2	67.31	7250000	2	13907	3	823	833			251.94	55	10100000000	260	255	929	73702	Hic74 [Hyriopsis cumingii]
HavC	1176704634	I.WKKIDC(+57.02)EEDDN(+.98)GKYYKRV.V	Y	36.59	2346.09	18	0.1	783.039	3	53.3	7660000	2	10924	4	830	847	Carbamidomethylation; Deamidation (NQ)	C6:Carbamidomethylation:1000.00;N11:Deamidation (NQ):1000.00	251.94	55	10100000000	260	255	929	73702	Hic74 [Hyriopsis cumingii]
HavC	1176704634	K.G(sub I)DC(+57.02)EEDDNGKYYKRVV.K	Y	36.51	1945.85	16	-1.7	973.929	2	53.26	1090000	2	10917	1	833	848	Carbamidomethylation	C3:Carbamidomethylation:1000.00	251.94	55	10100000000	260	255	929	73702	Hic74 [Hyriopsis cumingii]
HavC	1176704634	G.SGGSGGSGQ(+.98)G(sub R)DKVQEEIWK.K	Y	36.4	1905.87	19	-1.9	953.941	2	57.21	3510000	1	11941	2	813	831	Deamidation (NQ)	Q9:Deamidation (NQ):115.97	251.94	55	10100000000	260	255	929	73702	Hic74 [Hyriopsis cumingii]
HavC	1176704634	S.GGSGGSGGSGQG(sub R)DKVQEEI.W	Y	36.38	1704.76	19	0.3	853.385	2	50.31	2180000	2	10288	1	811	829			251.94	55	10100000000	260	255	929	73702	Hic74 [Hyriopsis cumingii]
HavC	1176704634	G.V(+71.04)GGGGLDLDTDTL.L	Y	36.36	1302.63	13	-0.1	652.322	2	92.23	3650000	1	19514	2	289	301	Propionamide (K X@N-term)	V1:Propionamide (K X@N-term):1000.00	251.94	55	10100000000	260	255	929	73702	Hic74 [Hyriopsis cumingii]
HavC	1176704634	K.KID(+31.97)C(+57.02)EEDDNGK.Y	Y	36.36	1353.52	11	-1.4	677.765	2	19.65	8030000	1	3741	2	832	842	Persulfide; Carbamidomethylation	D3:Persulfide:29.39;C4:Carbamidomethylation:1000.00	251.94	55	10100000000	260	255	929	73702	Hic74 [Hyriopsis cumingii]
HavC	1176704634	A.SVLGDVDGLGGLSALGLG(-.98).G	Y	36.3	1597.87	18	0.5	799.941	2	110.64	60800	1	23593	1	124	141	Amidation	G18:Amidation:1000.00	251.94	55	10100000000	260	255	929	73702	Hic74 [Hyriopsis cumingii]
HavC	1176704634	G.GAGALGLASVLGDVDG.L	Y	36.27	1370.7	16	0.3	686.36	2	105.32	2350000	2	22341	1	116	131			251.94	55	10100000000	260	255	929	73702	Hic74 [Hyriopsis cumingii]
HavC	1176704634	C.EEDDN(-17.03)GKYYKRV.V	Y	36.25	1497.67	12	-1	749.843	2	49.73	3100000	2	10167	2	836	847	Ammonia-loss (N)	N5:Ammonia-loss (N):1000.00	251.94	55	10100000000	260	255	929	73702	Hic74 [Hyriopsis cumingii]
HavC	1176704634	G.AGAA(sub G)AGAGGAGALGLASVLGDVDGLG.G	Y	36.25	2067.06	26	1.1	1034.54	2	110.83	402000	1	23637	1	108	133			251.94	55	10100000000	260	255	929	73702	Hic74 [Hyriopsis cumingii]
HavC	1176704634	I.DC(+57.02)EEDDN(+.98)GKYYKR.V	Y	36.24	1691.67	13	-0.2	846.844	2	28.47	42900000	2	5580	4	834	846	Carbamidomethylation; Deamidation (NQ)	C2:Carbamidomethylation:1000.00;N7:Deamidation (NQ):1000.00	251.94	55	10100000000	260	255	929	73702	Hic74 [Hyriopsis cumingii]
HavC	1176704634	R.VPILGASAAASAAA.S	Y	36.16	1168.65	14	-0.9	585.329	2	77.53	4470000	1	16323	2	62	75			251.94	55	10100000000	260	255	929	73702	Hic74 [Hyriopsis cumingii]
HavC	1176704634	A.AAAGGDGDALAASAAR(+15.99).R	Y	36.1	1359.64	16	0.5	680.827	2	46.86	3120000	2	9556	6	730	745	Oxidation or Hydroxylation	R16:Oxidation or Hydroxylation:75.74	251.94	55	10100000000	260	255	929	73702	Hic74 [Hyriopsis cumingii]
HavC	1176704634	K.IDC(+57.02)EEDDN(+.98)GKYYKR.V	Y	36.09	1804.76	14	0.1	903.386	2	37.72	6100000	2	7566	3	833	846	Carbamidomethylation; Deamidation (NQ)	C3:Carbamidomethylation:1000.00;N8:Deamidation (NQ):1000.00	251.94	55	10100000000	260	255	929	73702	Hic74 [Hyriopsis cumingii]
HavC	1176704634	S.GGSGGSGQG(sub R)DKVQEEI.W	Y	36.08	1503.68	16	-1.2	752.846	2	50.07	5260000	2	10238	2	814	829			251.94	55	10100000000	260	255	929	73702	Hic74 [Hyriopsis cumingii]
HavC	1176704634	K.IDC(+57.02)EEDDN(+.98)GKYY.K	Y	36.05	1520.56	12	-0.7	761.287	2	60.3	10100000	2	12415	4	833	844	Carbamidomethylation; Deamidation (NQ)	C3:Carbamidomethylation:1000.00;N8:Deamidation (NQ):1000.00	251.94	55	10100000000	260	255	929	73702	Hic74 [Hyriopsis cumingii]
HavC	1176704634	I.DC(+57.02)EEDDN(+.98)GKYY.K	Y	36.02	1407.48	11	-0.5	704.745	2	57.97	180000000	2	11916	6	834	844	Carbamidomethylation; Deamidation (NQ)	C2:Carbamidomethylation:1000.00;N7:Deamidation (NQ):1000.00	251.94	55	10100000000	260	255	929	73702	Hic74 [Hyriopsis cumingii]
HavC	1176704634	G.SGGSGQG(sub R)DKVQEEIWK.K	Y	35.99	1703.81	16	0.7	852.914	2	55.27	5950000	1	11525	2	816	831			251.94	55	10100000000	260	255	929	73702	Hic74 [Hyriopsis cumingii]
HavC	1176704634	K.IDC(+57.02)EEDDNGK(+43.99)YYKR.V	Y	35.94	1847.76	14	-0.2	924.889	2	52.31	921000	2	10715	1	833	846	Carbamidomethylation; Carboxylation (DKW)	C3:Carbamidomethylation:1000.00;K10:Carboxylation (DKW):0.00	251.94	55	10100000000	260	255	929	73702	Hic74 [Hyriopsis cumingii]
HavC	1176704634	A.SVLGDVDGLGGL.S	Y	35.94	1100.57	12	0.5	1101.58	1	102.14	134000000	1	21699	17	124	135			251.94	55	10100000000	260	255	929	73702	Hic74 [Hyriopsis cumingii]
HavC	1176704634	G.SGGSGGSGGSGGSGQRDKVQEE(+14.02).I	Y	35.86	1992.87	22	-7.9	997.436	2	50.57	1120000	2	10343	1	807	828	Methylation(others)	E22:Methylation(others):0.00	251.94	55	10100000000	260	255	929	73702	Hic74 [Hyriopsis cumingii]
HavC	1176704634	R.VPILGASAAASAAASAGGFG.G	Y	35.84	1644.85	20	-1.6	823.429	2	91.71	108000	1	19402	1	62	81			251.94	55	10100000000	260	255	929	73702	Hic74 [Hyriopsis cumingii]
HavC	1176704634	G.SGGSGGSGQG(sub R)DKVQEEI.W	Y	35.57	1590.71	17	-0.9	796.363	2	50.17	10400000	2	10260	3	813	829			251.94	55	10100000000	260	255	929	73702	Hic74 [Hyriopsis cumingii]
HavC	1176704634	I.WKKIDC(+57.02)EEDDN.G	Y	35.43	1450.6	11	0	726.309	2	38.44	1060000	2	7719	1	830	840	Carbamidomethylation	C6:Carbamidomethylation:1000.00	251.94	55	10100000000	260	255	929	73702	Hic74 [Hyriopsis cumingii]
HavC	1176704634	V.QEEIWKKID(-.98).C	Y	35.12	1186.63	9	0	594.325	2	57	3820000	2	11711	1	826	834	Amidation	D9:Amidation:1000.00	251.94	55	10100000000	260	255	929	73702	Hic74 [Hyriopsis cumingii]
HavC	1176704634	K.VQEEIW(+31.99)KK.I	Y	35.12	1090.57	8	0	546.29	2	24.16	708000000	1	4724	12	825	832	Dihydroxy	W6:Dihydroxy:21.94	251.94	55	10100000000	260	255	929	73702	Hic74 [Hyriopsis cumingii]
HavC	1176704634	G.SGGSGGSGGSGGSGQRDK.V	Y	35.11	1493.65	18	-8.3	747.824	2	17.84	8580000	2	3324	2	807	824			251.94	55	10100000000	260	255	929	73702	Hic74 [Hyriopsis cumingii]
HavC	1176704634	E.DDN(+.98)GKYYKRVV.K	Y	35.07	1356.67	11	0.8	679.341	2	50.94	1510000	2	10423	1	838	848	Deamidation (NQ)	N3:Deamidation (NQ):1000.00	251.94	55	10100000000	260	255	929	73702	Hic74 [Hyriopsis cumingii]
HavC	1176704634	G.SGGSGGSGGSGGSGQRDKVQE(+14.02)E.I	Y	35.07	1992.87	22	-5.7	997.438	2	48.65	0	1	10092	1	807	828	Methylation(others)	E21:Methylation(others):0.00	251.94	55	10100000000	260	255	929	73702	Hic74 [Hyriopsis cumingii]
HavC	1176704634	R.AAAAAAAAAAAAAIRN(+.98).G	Y	35.05	1325.71	16	2.1	663.861	2	72.42	638000	2	15005	1	748	763	Deamidation (NQ)	N16:Deamidation (NQ):1000.00	251.94	55	10100000000	260	255	929	73702	Hic74 [Hyriopsis cumingii]
HavC	1176704634	A.GR(sub A)GAGAGGAGALGLASVLGDVDGLG.G	Y	35.04	2067.07	25	-2.7	1034.54	2	110.32	0	1	23523	1	109	133			251.94	55	10100000000	260	255	929	73702	Hic74 [Hyriopsis cumingii]
HavC	1176704634	I.DC(+57.02)EEDDNGKYY.K	Y	35.02	1406.49	11	-2.5	704.252	2	53.86	43200000	2	11044	1	834	844	Carbamidomethylation	C2:Carbamidomethylation:1000.00	251.94	55	10100000000	260	255	929	73702	Hic74 [Hyriopsis cumingii]
HavC	1176704634	G.G(+71.04)VGGGGLDLDTDTLL.A	Y	35.02	1472.74	15	0.1	737.375	2	101.89	217000	1	21643	1	288	302	Propionamide (K X@N-term)	G1:Propionamide (K X@N-term):1000.00	251.94	55	10100000000	260	255	929	73702	Hic74 [Hyriopsis cumingii]
HavC	1176704634	R.AAAAAAAAAAAAAIR.N	Y	34.99	1210.68	15	0.9	606.347	2	70.81	130000000	2	14656	7	748	762			251.94	55	10100000000	260	255	929	73702	Hic74 [Hyriopsis cumingii]
HavC	1176704634	W.KKIDC(+57.02)EEDDN(+.98)GKYYKRVV.K	Y	34.97	2259.08	18	-1.1	754.034	3	50.46	4670000	2	10320	2	831	848	Carbamidomethylation; Deamidation (NQ)	C5:Carbamidomethylation:1000.00;N10:Deamidation (NQ):1000.00	251.94	55	10100000000	260	255	929	73702	Hic74 [Hyriopsis cumingii]
HavC	1176704634	K.K(+43.01)IDC(+57.02)EEDDNGK.Y	Y	34.86	1364.55	11	2.9	683.285	2	25.7	3840000	2	4992	1	832	842	Carbamylation; Carbamidomethylation	K1:Carbamylation:109.46;C4:Carbamidomethylation:1000.00	251.94	55	10100000000	260	255	929	73702	Hic74 [Hyriopsis cumingii]
HavC	1176704634	G.GSGGSGGSGGSGQG(sub R)DKVQEEI.W	Y	34.85	1848.81	21	-0.3	925.411	2	50.47	1570000	2	10322	2	809	829			251.94	55	10100000000	260	255	929	73702	Hic74 [Hyriopsis cumingii]
HavC	1176704634	K.KIDC(+57.02)E(+37.95)EDDNGK.Y	Y	34.78	1359.49	11	-0.4	680.753	2	17.89	2530000	2	3335	1	832	842	Carbamidomethylation; Replacement of 2 protons by calcium	C4:Carbamidomethylation:1000.00;E5:Replacement of 2 protons by calcium:0.00	251.94	55	10100000000	260	255	929	73702	Hic74 [Hyriopsis cumingii]
HavC	1176704634	W.KKIDC(+57.02)EEDDN(+.98)GKYY.K	Y	34.73	1776.75	14	5.3	889.388	2	43.29	1010000	2	8777	4	831	844	Carbamidomethylation; Deamidation (NQ)	C5:Carbamidomethylation:1000.00;N10:Deamidation (NQ):1000.00	251.94	55	10100000000	260	255	929	73702	Hic74 [Hyriopsis cumingii]
HavC	1176704634	G.G(+71.04)VGGGGLDLDTDTL.L	Y	34.71	1359.65	14	-0.2	680.833	2	92.14	8500000	1	19494	6	288	301	Propionamide (K X@N-term)	G1:Propionamide (K X@N-term):1000.00	251.94	55	10100000000	260	255	929	73702	Hic74 [Hyriopsis cumingii]
HavC	1176704634	A.AAAAEVVDEFGIGAL.A	Y	34.71	1431.72	15	-0.9	716.869	2	102.9	631000	1	21869	2	91	105			251.94	55	10100000000	260	255	929	73702	Hic74 [Hyriopsis cumingii]
HavC	1176704634	I.DC(+57.02)EEDDNGKYYKR.V	Y	34.62	1690.69	13	0.1	846.352	2	24.95	6350000	2	4835	2	834	846	Carbamidomethylation	C2:Carbamidomethylation:1000.00	251.94	55	10100000000	260	255	929	73702	Hic74 [Hyriopsis cumingii]
HavC	1176704634	A.AAAEVVDEFGIGA.L	Y	34.59	1247.6	13	-0.4	624.809	2	90.06	1310000	1	19044	2	92	104			251.94	55	10100000000	260	255	929	73702	Hic74 [Hyriopsis cumingii]
HavC	1176704634	C.EEDDN(+.98)GKYYKRV.V	Y	34.48	1515.68	12	-1.1	758.848	2	35.05	9890000	2	6982	2	836	847	Deamidation (NQ)	N5:Deamidation (NQ):1000.00	251.94	55	10100000000	260	255	929	73702	Hic74 [Hyriopsis cumingii]
HavC	1176704634	G.SGGSGGSGGSGGSGQ(+.98)RDK.V	Y	34.31	1494.63	18	-6.6	748.317	2	18.03	18700000	1	3391	2	807	824	Deamidation (NQ)	Q15:Deamidation (NQ):1000.00	251.94	55	10100000000	260	255	929	73702	Hic74 [Hyriopsis cumingii]
HavC	1176704634	I.WKKIDC(+57.02)EEDDN(+.98)G.K	Y	34.28	1508.61	12	1.6	755.313	2	44.13	2130000	2	8960	5	830	841	Carbamidomethylation; Deamidation (NQ)	C6:Carbamidomethylation:1000.00;N11:Deamidation (NQ):1000.00	251.94	55	10100000000	260	255	929	73702	Hic74 [Hyriopsis cumingii]
HavC	1176704634	A.AAAAGGDGDALAASAAR(+15.99).R	Y	34.12	1430.67	17	1.8	716.346	2	46.59	4850000	1	9647	4	729	745	Oxidation or Hydroxylation	R17:Oxidation or Hydroxylation:55.01	251.94	55	10100000000	260	255	929	73702	Hic74 [Hyriopsis cumingii]
HavC	1176704634	A.SVLGDVDGLGG.L	Y	34.04	987.487	11	-2.6	988.492	1	81.85	382000	1	17258	1	124	134			251.94	55	10100000000	260	255	929	73702	Hic74 [Hyriopsis cumingii]
HavC	1176704634	A.SVLGDVDGLGGLSAL.G	Y	34.01	1371.72	15	-1.3	686.869	2	106.73	4840000	1	22724	6	124	138			251.94	55	10100000000	260	255	929	73702	Hic74 [Hyriopsis cumingii]
HavC	1176704634	I.DG(sub C)EEDDN(+.98)GKYYKRVV.K	Y	33.93	1786.8	15	1.1	894.409	2	54.69	1740000	2	11223	2	834	848	Deamidation (NQ)	N7:Deamidation (NQ):1000.00	251.94	55	10100000000	260	255	929	73702	Hic74 [Hyriopsis cumingii]
HavC	1176704634	K.KIDC(+57.02)EEDDNGKYYKR.V	Y	33.87	1931.87	15	1.6	644.964	3	28.46	1530000	2	5579	1	832	846	Carbamidomethylation	C4:Carbamidomethylation:1000.00	251.94	55	10100000000	260	255	929	73702	Hic74 [Hyriopsis cumingii]
HavC	1176704634	G.SGGSGGSGQG(sub R)DKVQEEIWK.K	Y	33.79	1904.89	19	1.7	635.971	3	55.17	2240000	1	11505	1	813	831			251.94	55	10100000000	260	255	929	73702	Hic74 [Hyriopsis cumingii]
HavC	1176704634	N.GKYYKRVVKV	Y	33.61	1238.75	10	0.6	620.383	2	47.23	6230000	2	9635	2	841	850			251.94	55	10100000000	260	255	929	73702	Hic74 [Hyriopsis cumingii]
HavC	1176704634	G.SGGSGGSGGSGQG(sub R)DKVQ(+.98)EEI.W	Y	33.45	1792.77	20	1.3	897.394	2	52.09	4490000	1	10843	2	810	829	Deamidation (NQ)	Q17:Deamidation (NQ):56.94	251.94	55	10100000000	260	255	929	73702	Hic74 [Hyriopsis cumingii]
HavC	1176704634	G.AGAA(sub G)AGAGGAGALGLASVLGDVD.G	Y	33.31	1839.93	23	0.4	920.974	2	103.07	1440000	1	21905	2	108	130			251.94	55	10100000000	260	255	929	73702	Hic74 [Hyriopsis cumingii]
HavC	1176704634	I.D(+31.97)C(+57.02)EEDDNGKYY.K	Y	33.24	1438.47	11	-0.2	720.24	2	54.88	1020000	1	11443	1	834	844	Persulfide; Carbamidomethylation	D1:Persulfide:55.36;C2:Carbamidomethylation:1000.00	251.94	55	10100000000	260	255	929	73702	Hic74 [Hyriopsis cumingii]
HavC	1176704634	I.WKKIDC(+57.02)EEDDN(+.98).G	Y	33.2	1451.59	11	-2.3	726.799	2	43.03	1970000	2	8720	3	830	840	Carbamidomethylation; Deamidation (NQ)	C6:Carbamidomethylation:1000.00;N11:Deamidation (NQ):1000.00	251.94	55	10100000000	260	255	929	73702	Hic74 [Hyriopsis cumingii]
HavC	1176704634	G.SGGSGGSGQ(+.98)G(sub R)DKVQ(+.98)EEIWK.K	Y	33.19	1906.85	19	-2.3	954.432	2	62.6	842000	2	12904	2	813	831	Deamidation (NQ)	Q9:Deamidation (NQ):1000.00;Q14:Deamidation (NQ):1000.00	251.94	55	10100000000	260	255	929	73702	Hic74 [Hyriopsis cumingii]
HavC	1176704634	G.SGGSGQG(sub R)DKVQEEI.W	Y	33.18	1389.64	14	0.1	695.826	2	47.77	18500000	1	9900	2	816	829			251.94	55	10100000000	260	255	929	73702	Hic74 [Hyriopsis cumingii]
HavC	1176704634	A.S(+87.03)VLGDVDGLGGL.S	Y	33.17	1187.6	12	-0.1	594.809	2	98.61	14400000	2	20853	1	124	135	Glycidamide adduct	S1:Glycidamide adduct:1000.00	251.94	55	10100000000	260	255	929	73702	Hic74 [Hyriopsis cumingii]
HavC	1176704634	Y.SAAAAAAAAAAASR.R	N	33.17	1129.58	14	-2.1	565.798	2	53.78	2440000	2	11026	1	704	717			251.94	55	10100000000	260	255	929	73702	Hic74 [Hyriopsis cumingii]
HavC	1176704634	G.L(+71.04)GGVGGGGLDLDTDTL.L	Y	33.08	1529.76	16	-0.9	765.885	2	99.66	6620000	1	21148	3	286	301	Propionamide (K X@N-term)	L1:Propionamide (K X@N-term):1000.00	251.94	55	10100000000	260	255	929	73702	Hic74 [Hyriopsis cumingii]
HavC	1176704634	G.SGGSGQ(+.98)G(sub R)DKVQEEIWK.K	Y	33.05	1704.8	16	-0.2	853.405	2	57.71	6480000	1	12048	1	816	831	Deamidation (NQ)	Q6:Deamidation (NQ):122.18	251.94	55	10100000000	260	255	929	73702	Hic74 [Hyriopsis cumingii]
HavC	1176704634	C.EEDDN(+.98)GKYYKRVV.K	Y	33.01	1614.75	13	6.7	808.389	2	51.22	25900000	2	10480	5	836	848	Deamidation (NQ)	N5:Deamidation (NQ):1000.00	251.94	55	10100000000	260	255	929	73702	Hic74 [Hyriopsis cumingii]
HavC	1176704634	E.EDDN(-17.03)GKYYKRVV.K	Y	32.9	1467.7	12	-0.3	734.857	2	58.22	584000	2	11969	1	837	848	Ammonia-loss (N)	N4:Ammonia-loss (N):1000.00	251.94	55	10100000000	260	255	929	73702	Hic74 [Hyriopsis cumingii]
HavC	1176704634	A.EVVDEFGIGALAGA(+28.03).G	Y	32.87	1374.7	14	5	688.362	2	84.6	13200000	1	17854	4	95	108	Ethylation	A14:Ethylation:44.81	251.94	55	10100000000	260	255	929	73702	Hic74 [Hyriopsis cumingii]
HavC	1176704634	S.GGSGGSGQ(+.98)G(sub R)DKVQEEIWK.K	Y	32.84	1818.84	18	2.5	910.429	2	57.42	876000	1	11986	1	814	831	Deamidation (NQ)	Q8:Deamidation (NQ):115.97	251.94	55	10100000000	260	255	929	73702	Hic74 [Hyriopsis cumingii]
HavC	1176704634	G.SGGSGGSGGSGQRDKVQEE(+14.02).I	Y	32.74	1791.8	19	-3.8	896.903	2	50.39	4100000	2	10305	1	810	828	Methylation(others)	E19:Methylation(others):0.00	251.94	55	10100000000	260	255	929	73702	Hic74 [Hyriopsis cumingii]
HavC	1176704634	A.LSLGLGF(sub I)GGGEADDLALL.S	Y	32.68	1716.89	18	-0.5	859.453	2	111.79	227000	1	23849	1	304	321			251.94	55	10100000000	260	255	929	73702	Hic74 [Hyriopsis cumingii]
HavC	1176704634	G.S(+43.01)EGGDGGAGFGGGAGA.G	Y	32.66	1265.49	16	1.5	633.754	2	56.43	0	1	11770	1	213	228	Carbamylation	S1:Carbamylation:1000.00	251.94	55	10100000000	260	255	929	73702	Hic74 [Hyriopsis cumingii]
HavC	1176704634	A.AAAAAAEVVDEFGIGALAGA(+28.03).G	Y	32.63	1800.93	20	5.5	901.475	2	92.03	525000	1	19470	2	89	108	Ethylation	A20:Ethylation:41.11	251.94	55	10100000000	260	255	929	73702	Hic74 [Hyriopsis cumingii]
HavC	1176704634	K.IDC(+57.02)EED(+21.98)DNGK.Y	Y	32.6	1215.43	10	-1.6	608.723	2	20.39	1610000	2	3867	1	833	842	Carbamidomethylation; Sodium adduct	C3:Carbamidomethylation:1000.00;D6:Sodium adduct:0.00	251.94	55	10100000000	260	255	929	73702	Hic74 [Hyriopsis cumingii]
HavC	1176704634	A.GGSGGSGGSGGSGGSGQ(+.98)RDK.V	Y	32.59	1608.67	20	-7.8	805.337	2	19.27	7490000	2	3629	2	805	824	Deamidation (NQ)	Q17:Deamidation (NQ):1000.00	251.94	55	10100000000	260	255	929	73702	Hic74 [Hyriopsis cumingii]
HavC	1176704634	A.ALGLGGL(sub V)GGGGLDLDTDTL.L	Y	32.54	1713.88	19	-1.3	857.945	2	105.67	1980000	1	22485	1	283	301			251.94	55	10100000000	260	255	929	73702	Hic74 [Hyriopsis cumingii]
HavC	1176704634	G.GSGGSGGSGQG(sub R)DKVQEEI.W	Y	32.53	1647.73	18	-2.3	824.872	2	51.39	4410000	2	10518	2	812	829			251.94	55	10100000000	260	255	929	73702	Hic74 [Hyriopsis cumingii]
HavC	1176704634	R.R(+.98)AAAAAAAAAAAAAIR.N	Y	32.5	1367.76	16	-0.7	684.888	2	74.63	1450000	2	15497	1	747	762	Deamidation (R)	R1:Deamidation (R):102.40	251.94	55	10100000000	260	255	929	73702	Hic74 [Hyriopsis cumingii]
HavC	1176704634	V.QEEIW(+31.99)KKID.C	Y	32.48	1219.61	9	1.6	610.812	2	50.61	4700000	2	10351	1	826	834	Dihydroxy	W5:Dihydroxy:20.92	251.94	55	10100000000	260	255	929	73702	Hic74 [Hyriopsis cumingii]
HavC	1176704634	K.VQEEIW(+31.99)K.K	Y	32.47	962.471	7	-1	482.242	2	34.07	248000000	1	6889	8	825	831	Dihydroxy	W6:Dihydroxy:17.01	251.94	55	10100000000	260	255	929	73702	Hic74 [Hyriopsis cumingii]
HavC	1176704634	I.D(+31.97)C(+57.02)EEDDNGKYYKRV.V	Y	32.43	1821.73	14	-0.1	608.25	3	38.76	3790000	1	7925	2	834	847	Persulfide; Carbamidomethylation	D1:Persulfide:41.53;C2:Carbamidomethylation:1000.00	251.94	55	10100000000	260	255	929	73702	Hic74 [Hyriopsis cumingii]
HavC	1176704634	G.GAGALGLASVLGDVDGLG.G	Y	32.43	1540.81	18	-2.9	771.41	2	111.97	5900000	2	23799	1	116	133			251.94	55	10100000000	260	255	929	73702	Hic74 [Hyriopsis cumingii]
HavC	1176704634	C.EEDDN(-17.03)GKYYK.R	Y	32.37	1242.5	10	0	622.259	2	41.13	3690000	1	8447	3	836	845	Ammonia-loss (N)	N5:Ammonia-loss (N):1000.00	251.94	55	10100000000	260	255	929	73702	Hic74 [Hyriopsis cumingii]
HavC	1176704634	S.RFEQYVP(+31.99)GH.G	Y	32.34	1163.54	9	0.2	582.775	2	49.69	11600000	1	10320	2	30	38	Dihydroxy	P7:Dihydroxy:51.51	251.94	55	10100000000	260	255	929	73702	Hic74 [Hyriopsis cumingii]
HavC	1176704634	K.VQEEIW(+15.99)KK.I	Y	32.33	1074.57	8	1.3	538.293	2	34.25	59100000	1	6929	7	825	832	Oxidation (HW)	W6:Oxidation (HW):1000.00	251.94	55	10100000000	260	255	929	73702	Hic74 [Hyriopsis cumingii]
HavC	1176704634	K.IDC(+57.02)EEDDNGK(+43.99)YYK.R	Y	32.27	1691.66	13	-0.3	846.838	2	57.48	2360000	2	11812	1	833	845	Carbamidomethylation; Carboxylation (DKW)	C3:Carbamidomethylation:1000.00;K10:Carboxylation (DKW):0.00	251.94	55	10100000000	260	255	929	73702	Hic74 [Hyriopsis cumingii]
HavC	1176704634	A.ALGLGGVGGGGLD(+14.02)LDTDTL.L	Y	32.22	1713.88	19	-0.2	857.946	2	106.17	1980000	1	22598	1	283	301	Methylation(others)	D13:Methylation(others):22.85	251.94	55	10100000000	260	255	929	73702	Hic74 [Hyriopsis cumingii]
HavC	1176704634	R.AAASAAAAAAAVSSGDG.S	Y	32.14	1317.62	17	1.1	659.816	2	65.09	909000	2	13433	1	528	544			251.94	55	10100000000	260	255	929	73702	Hic74 [Hyriopsis cumingii]
HavC	1176704634	G.GSGGSGGSGGSGGSGQ(+.98)RDK.V	Y	32.03	1551.65	19	-8	776.827	2	19.29	9370000	2	3633	2	806	824	Deamidation (NQ)	Q16:Deamidation (NQ):1000.00	251.94	55	10100000000	260	255	929	73702	Hic74 [Hyriopsis cumingii]
HavC	1176704634	A.SVLGDVD(+21.98)GLGGLS.A	Y	31.96	1209.59	13	-1.9	605.799	2	92.52	70300	1	19577	1	124	136	Sodium adduct	D7:Sodium adduct:20.35	251.94	55	10100000000	260	255	929	73702	Hic74 [Hyriopsis cumingii]
HavC	1176704634	I.WKKIDC(+57.02)EEDDN(+.98)GKYYKRVV.K	Y	31.93	2445.16	19	0.6	816.062	3	57.43	4640000	2	11801	3	830	848	Carbamidomethylation; Deamidation (NQ)	C6:Carbamidomethylation:1000.00;N11:Deamidation (NQ):1000.00	251.94	55	10100000000	260	255	929	73702	Hic74 [Hyriopsis cumingii]
HavC	1176704634	S.GGSGGSGGSGGSGQG(sub R)DKVQ(+.98)EEI.W	Y	31.91	1906.81	22	-0.5	954.414	2	53.56	1270000	2	10979	1	808	829	Deamidation (NQ)	Q19:Deamidation (NQ):81.69	251.94	55	10100000000	260	255	929	73702	Hic74 [Hyriopsis cumingii]
HavC	1176704634	A.GGAGALGLASVLGDVDGLG.G	Y	31.88	1597.83	19	1.9	799.924	2	111.68	0	2	23738	1	115	133			251.94	55	10100000000	260	255	929	73702	Hic74 [Hyriopsis cumingii]
HavC	1176704634	G.GSGGSGQG(sub R)DKVQ(+.98)EEIWK.K	Y	31.85	1761.82	17	0.5	881.916	2	60.28	1460000	2	12411	2	815	831	Deamidation (NQ)	Q12:Deamidation (NQ):89.05	251.94	55	10100000000	260	255	929	73702	Hic74 [Hyriopsis cumingii]
HavC	1176704634	I.WKKIDC(+57.02)EEDD.N	Y	31.81	1336.56	10	-0.1	669.288	2	39.2	4100000	2	7886	2	830	839	Carbamidomethylation	C6:Carbamidomethylation:1000.00	251.94	55	10100000000	260	255	929	73702	Hic74 [Hyriopsis cumingii]
HavC	1176704634	A.SVLGDVDGLGGLSALGL(-.98).G	Y	31.8	1540.85	17	1.3	771.431	2	111.74	0	1	23838	1	124	140	Amidation	L17:Amidation:1000.00	251.94	55	10100000000	260	255	929	73702	Hic74 [Hyriopsis cumingii]
HavC	1176704634	R.VPILGASAAASAAASAG.G	Y	31.64	1383.74	17	-0.3	692.875	2	79.9	468000	1	16833	1	62	78			251.94	55	10100000000	260	255	929	73702	Hic74 [Hyriopsis cumingii]
HavC	1176704634	E.EDDN(+.98)GKYYKRV.V	Y	31.55	1386.64	11	2.4	694.33	2	32.74	2960000	2	6493	2	837	847	Deamidation (NQ)	N4:Deamidation (NQ):1000.00	251.94	55	10100000000	260	255	929	73702	Hic74 [Hyriopsis cumingii]
HavC	1176704634	G.GSGGSGGSGGSGQG(sub R)DKVQ(+.98)EEI.W	Y	31.55	1849.79	21	0.7	925.904	2	51.83	0	1	10785	1	809	829	Deamidation (NQ)	Q18:Deamidation (NQ):43.82	251.94	55	10100000000	260	255	929	73702	Hic74 [Hyriopsis cumingii]
HavC	1176704634	E.VVDEFGIGALAGA(+28.03).G	Y	31.47	1245.66	13	7.5	623.842	2	80.46	784000	1	16954	2	96	108	Ethylation	A13:Ethylation:43.00	251.94	55	10100000000	260	255	929	73702	Hic74 [Hyriopsis cumingii]
HavC	1176704634	Y.G(+43.01)SEGGDGGAGFGGGAGA.G	Y	31.45	1322.51	17	-2.9	662.261	2	58.13	592000	2	11950	1	212	228	Carbamylation	G1:Carbamylation:1000.00	251.94	55	10100000000	260	255	929	73702	Hic74 [Hyriopsis cumingii]
HavC	1176704634	K.IDC(+57.02)EEDDNGKYY.K	Y	31.39	1519.58	12	-0.5	760.795	2	57.41	436000	2	11797	1	833	844	Carbamidomethylation	C3:Carbamidomethylation:1000.00	251.94	55	10100000000	260	255	929	73702	Hic74 [Hyriopsis cumingii]
HavC	1176704634	G.SGGSGQ(+.98)G(sub R)DKVQEEI.W	Y	31.39	1390.62	14	0.2	696.318	2	51.33	24400000	1	10677	2	816	829	Deamidation (NQ)	Q6:Deamidation (NQ):48.19	251.94	55	10100000000	260	255	929	73702	Hic74 [Hyriopsis cumingii]
HavC	1176704634	G.SGGSGGSGQ(+.98)G(sub R)DKVQEEI.W	Y	31.37	1591.7	17	0.2	796.856	2	53.22	11300000	2	10908	2	813	829	Deamidation (NQ)	Q9:Deamidation (NQ):76.42	251.94	55	10100000000	260	255	929	73702	Hic74 [Hyriopsis cumingii]
HavC	1176704634	G.G(+71.04)VGGGGLDLDTDTLLA.L	Y	31.36	1543.77	16	2.9	772.896	2	100.89	67600	1	21421	1	288	303	Propionamide (K X@N-term)	G1:Propionamide (K X@N-term):1000.00	251.94	55	10100000000	260	255	929	73702	Hic74 [Hyriopsis cumingii]
HavC	1176704634	G.GSGGSGQ(+.98)G(sub R)DKVQEEIWK.K	Y	31.26	1761.82	17	0.9	881.917	2	57.28	8060000	1	11956	2	815	831	Deamidation (NQ)	Q7:Deamidation (NQ):115.97	251.94	55	10100000000	260	255	929	73702	Hic74 [Hyriopsis cumingii]
HavC	1176704634	D.K(+172.05)VQEEIWK.K	Y	31.25	1230.63	8	-3.2	616.319	2	54.37	18400000	1	11336	3	824	831	Menadione hydroquinone derivative	K1:Menadione hydroquinone derivative:177.95	251.94	55	10100000000	260	255	929	73702	Hic74 [Hyriopsis cumingii]
HavC	1176704634	K.G(sub I)DC(+57.02)EEDDN(+.98)GKYYKRVV.K	Y	31.09	1946.83	16	-0.9	974.422	2	55.76	8490000	2	11449	2	833	848	Carbamidomethylation; Deamidation (NQ)	C3:Carbamidomethylation:1000.00;N8:Deamidation (NQ):1000.00	251.94	55	10100000000	260	255	929	73702	Hic74 [Hyriopsis cumingii]
HavC	1176704634	G.SGGSGQG(sub R)DKVQ(+.98)EEIWK.K	Y	31.08	1704.8	16	-0.9	853.404	2	60.32	4220000	2	12418	4	816	831	Deamidation (NQ)	Q11:Deamidation (NQ):115.49	251.94	55	10100000000	260	255	929	73702	Hic74 [Hyriopsis cumingii]
HavC	1176704634	G.AGALGLASVLGDVDGLG.G	Y	31.07	1483.79	17	1.2	742.902	2	110.22	78900	1	23501	1	117	133			251.94	55	10100000000	260	255	929	73702	Hic74 [Hyriopsis cumingii]
HavC	1176704634	L.SLGLGF(sub I)GGGEADDLALL.S	Y	31.06	1603.81	17	-1.6	802.911	2	111.65	356000	1	23819	1	305	321			251.94	55	10100000000	260	255	929	73702	Hic74 [Hyriopsis cumingii]
HavC	1176704634	G.GSGGGGGS(sub A)GGSGGSGGSGGSGGSGQRDK.V	Y	31.04	2123.88	28	-6.9	1062.94	2	18.89	1220000	2	3548	1	797	824			251.94	55	10100000000	260	255	929	73702	Hic74 [Hyriopsis cumingii]
HavC	1176704634	K.VQEEIW(+15.99)K.K	Y	31	946.476	7	0.2	474.245	2	52.07	487000000	1	10840	10	825	831	Oxidation (HW)	W6:Oxidation (HW):1000.00	251.94	55	10100000000	260	255	929	73702	Hic74 [Hyriopsis cumingii]
HavC	1176704634	W.KKIDC(+57.02)EEDDN(+.98)GKYYKRV.V	Y	30.95	2160.02	17	-0.2	721.012	3	40.55	1190000	2	8180	1	831	847	Carbamidomethylation; Deamidation (NQ)	C5:Carbamidomethylation:1000.00;N10:Deamidation (NQ):1000.00	251.94	55	10100000000	260	255	929	73702	Hic74 [Hyriopsis cumingii]
HavC	1176704634	G.GAGALGLASVLGDVDGL.G	Y	30.94	1483.79	17	-3	742.899	2	112	0	2	23804	1	116	132			251.94	55	10100000000	260	255	929	73702	Hic74 [Hyriopsis cumingii]
HavC	1176704634	K.G(sub I)DC(+57.02)EEDDNGKYYKRV.V	Y	30.94	1846.78	15	-1.1	924.396	2	41.3	1230000	2	8340	1	833	847	Carbamidomethylation	C3:Carbamidomethylation:1000.00	251.94	55	10100000000	260	255	929	73702	Hic74 [Hyriopsis cumingii]
HavC	1176704634	D.DN(+.98)GKYYKRVV.K	Y	30.91	1241.64	10	0.6	621.828	2	47.15	1090000	2	9619	2	839	848	Deamidation (NQ)	N2:Deamidation (NQ):1000.00	251.94	55	10100000000	260	255	929	73702	Hic74 [Hyriopsis cumingii]
HavC	1176704634	G.GSGGSGQG(sub R)DKVQEEIWK.K	Y	30.84	1760.83	17	-0.2	881.423	2	55.34	576000	1	11540	1	815	831			251.94	55	10100000000	260	255	929	73702	Hic74 [Hyriopsis cumingii]
HavC	1176704634	G.SGGSGQG(sub R)DKVQ(+.98)EEI.W	Y	30.82	1390.62	14	-0.9	696.317	2	51.84	47100000	1	10787	2	816	829	Deamidation (NQ)	Q11:Deamidation (NQ):70.86	251.94	55	10100000000	260	255	929	73702	Hic74 [Hyriopsis cumingii]
HavC	1176704634	G.SGGSGGSGGSGQ(+.98)G(sub R)DKVQEEI.W	Y	30.8	1792.77	20	-1.7	897.391	2	51.52	9340000	1	10719	2	810	829	Deamidation (NQ)	Q12:Deamidation (NQ):58.00	251.94	55	10100000000	260	255	929	73702	Hic74 [Hyriopsis cumingii]
HavC	1176704634	G.SGGSGGSGGSGGSGQ(+.98)G(sub R)DKVQEEI.W	Y	30.77	1993.85	23	-1.4	997.929	2	51.68	0	1	10752	1	807	829	Deamidation (NQ)	Q15:Deamidation (NQ):30.64	251.94	55	10100000000	260	255	929	73702	Hic74 [Hyriopsis cumingii]
HavC	1176704634	A.GR(sub A)GAGAGGAGALGLASVLGDVDG.L	Y	30.76	1896.97	23	-4.3	949.486	2	102.73	183000	1	21830	1	109	131			251.94	55	10100000000	260	255	929	73702	Hic74 [Hyriopsis cumingii]
HavC	1176704634	A.GAGR(sub A)GAGGAGALGLASVLGDVDGLGGL.S	Y	30.74	2237.18	27	-3.9	1119.59	2	111.81	0	1	23853	1	109	135			251.94	55	10100000000	260	255	929	73702	Hic74 [Hyriopsis cumingii]
HavC	1176704634	E.EDDN(-17.03)GKYYKRV.V	Y	30.69	1368.63	11	-1.1	685.322	2	49.6	403000	2	10138	1	837	847	Ammonia-loss (N)	N4:Ammonia-loss (N):1000.00	251.94	55	10100000000	260	255	929	73702	Hic74 [Hyriopsis cumingii]
HavC	1176704634	G.SGGSGGSGGSGGSGQRDKVQ(+15.00)EE.I	Y	30.69	1993.86	22	-6.5	997.929	2	53.64	1400000	2	10995	1	807	828	Deamidation followed by a methylation	Q20:Deamidation followed by a methylation:19.89	251.94	55	10100000000	260	255	929	73702	Hic74 [Hyriopsis cumingii]
HavC	1176704634	R.DKVQEEIWK.K	Y	30.66	1173.6	9	0.9	587.809	2	56.83	57000000	1	11857	5	823	831			251.94	55	10100000000	260	255	929	73702	Hic74 [Hyriopsis cumingii]
HavC	1176704634	G.GSGQ(+.98)G(sub R)DKVQEEIWK.K	Y	30.65	1560.74	14	1	781.379	2	57.9	8870000	1	12091	2	818	831	Deamidation (NQ)	Q4:Deamidation (NQ):115.97	251.94	55	10100000000	260	255	929	73702	Hic74 [Hyriopsis cumingii]
HavC	1176704634	S.GGSGQG(sub R)DKVQEEIWK.K	Y	30.58	1616.78	15	1.5	809.398	2	55.28	458000	1	11526	1	817	831			251.94	55	10100000000	260	255	929	73702	Hic74 [Hyriopsis cumingii]
HavC	1176704634	I.DG(sub C)EEDDN(+.98)GKYYKRV.V	Y	30.55	1687.73	14	2.7	844.876	2	44.84	3750000	2	9115	3	834	847	Deamidation (NQ)	N7:Deamidation (NQ):1000.00	251.94	55	10100000000	260	255	929	73702	Hic74 [Hyriopsis cumingii]
HavC	1176704634	G.SGGSGGSGGSGQ(+.98)G(sub R)DKVQ(+.98)EEI.W	Y	30.43	1793.76	20	-2	897.883	2	56.19	8680000	2	11540	2	810	829	Deamidation (NQ)	Q12:Deamidation (NQ):1000.00;Q17:Deamidation (NQ):1000.00	251.94	55	10100000000	260	255	929	73702	Hic74 [Hyriopsis cumingii]
HavC	1176704634	G.V(+71.04)GGGGLDLDTDTLLA.L	Y	30.31	1486.75	15	-0.9	744.382	2	101.22	66500	1	21493	1	289	303	Propionamide (K X@N-term)	V1:Propionamide (K X@N-term):1000.00	251.94	55	10100000000	260	255	929	73702	Hic74 [Hyriopsis cumingii]
HavC	1176704634	G.SGGSGGSGQG(sub R)DKVQ(+.98)EEI.W	Y	30.24	1591.7	17	-0.9	796.855	2	51.7	19400000	1	10757	2	813	829	Deamidation (NQ)	Q14:Deamidation (NQ):60.21	251.94	55	10100000000	260	255	929	73702	Hic74 [Hyriopsis cumingii]
HavC	1176704634	A.AAAEVVDEFGIGAL.A	Y	30.14	1360.69	14	0.5	681.351	2	101.46	80200	1	21548	1	92	105			251.94	55	10100000000	260	255	929	73702	Hic74 [Hyriopsis cumingii]
HavC	1176704634	L.GLASVLGDVDGLGGLS.A	Y	30.09	1428.75	16	-2.2	715.379	2	105.41	5380000	2	22360	2	121	136			251.94	55	10100000000	260	255	929	73702	Hic74 [Hyriopsis cumingii]
HavC	1176704634	G.GAS(sub A)AAAAAAAAAAEVVDEFGIGALAGV(sub A).G	Y	29.96	2300.16	27	4.9	1151.1	2	111.8	174000	2	23763	1	82	108			251.94	55	10100000000	260	255	929	73702	Hic74 [Hyriopsis cumingii]
HavC	1176704634	K.G(sub I)DC(+57.02)EEDDN(+.98)GKYYKRV.V	Y	29.92	1847.76	15	-1.5	924.888	2	48.4	7010000	2	9882	2	833	847	Carbamidomethylation; Deamidation (NQ)	C3:Carbamidomethylation:1000.00;N8:Deamidation (NQ):1000.00	251.94	55	10100000000	260	255	929	73702	Hic74 [Hyriopsis cumingii]
HavC	1176704634	G.SGGSGGSGGSGGSGQ(+.98)G(sub R)DKVQ(+.98)EEI.W	Y	29.88	1994.83	23	-4.1	998.418	2	56.16	1470000	2	11532	2	807	829	Deamidation (NQ)	Q15:Deamidation (NQ):1000.00;Q20:Deamidation (NQ):1000.00	251.94	55	10100000000	260	255	929	73702	Hic74 [Hyriopsis cumingii]
HavC	1176704634	A.AGGDGDALAASAAR(+15.99).R	Y	29.84	1217.56	14	0.8	609.79	2	40.88	714000	2	8250	1	732	745	Oxidation or Hydroxylation	R14:Oxidation or Hydroxylation:53.45	251.94	55	10100000000	260	255	929	73702	Hic74 [Hyriopsis cumingii]
HavC	1176704634	G.GGGGS(sub A)GGSGGSGGSGGSGGSGQRDK.V	Y	29.83	1922.81	25	-5.3	962.405	2	18.57	3540000	2	3479	1	800	824			251.94	55	10100000000	260	255	929	73702	Hic74 [Hyriopsis cumingii]
HavC	1176704634	R.R(-42.02)AAAAAAAAAAAAAIR.N	Y	29.83	1324.76	16	-1.1	663.385	2	62.64	482000	2	12911	1	747	762	Ornithine from Arginine	R1:Ornithine from Arginine:122.57	251.94	55	10100000000	260	255	929	73702	Hic74 [Hyriopsis cumingii]
HavC	1176704634	G.GAGALGLASVLGD(+17.03)VD.G	Y	29.8	1330.71	15	0.6	666.362	2	106.09	919000	2	22510	1	116	130	Replacement of proton with ammonium ion	D13:Replacement of proton with ammonium ion:0.00	251.94	55	10100000000	260	255	929	73702	Hic74 [Hyriopsis cumingii]
HavC	1176704634	K.IDC(+57.02)EEDDN(+.98)GK.Y	Y	29.76	1194.43	10	0.7	598.225	2	22.52	1510000000	2	4317	9	833	842	Carbamidomethylation; Deamidation (NQ)	C3:Carbamidomethylation:1000.00;N8:Deamidation (NQ):1000.00	251.94	55	10100000000	260	255	929	73702	Hic74 [Hyriopsis cumingii]
HavC	1176704634	K.KIDG(sub C)EEDDN(+.98)GKYYK.R	Y	29.75	1673.74	14	-1	837.877	2	32.38	13200000	1	6517	7	832	845	Deamidation (NQ)	N9:Deamidation (NQ):1000.00	251.94	55	10100000000	260	255	929	73702	Hic74 [Hyriopsis cumingii]
HavC	1176704634	S.GGSGQG(sub R)DKVQEEI.W	Y	29.67	1302.61	13	-1.3	652.309	2	49.63	557000	2	10144	3	817	829			251.94	55	10100000000	260	255	929	73702	Hic74 [Hyriopsis cumingii]
HavC	1176704634	Y.VP(+31.99)GHGWVT.M	Y	29.65	883.419	8	1.1	442.717	2	55.52	0	1	11577	1	35	42	Dihydroxy	P2:Dihydroxy:8.87	251.94	55	10100000000	260	255	929	73702	Hic74 [Hyriopsis cumingii]
HavC	1176704634	G.GGGS(sub A)GGSGGSGGSGGSGGSGQRDK.V	Y	29.57	1865.78	24	-5.3	933.895	2	18.35	4110000	2	3434	1	801	824			251.94	55	10100000000	260	255	929	73702	Hic74 [Hyriopsis cumingii]
HavC	1176704634	G.GDGDALAASAAR(+15.99).R	Y	29.46	1089.51	12	0.8	545.76	2	43.78	4680000	2	8885	5	734	745	Oxidation or Hydroxylation	R12:Oxidation or Hydroxylation:81.59	251.94	55	10100000000	260	255	929	73702	Hic74 [Hyriopsis cumingii]
HavC	1176704634	G.SGQG(sub R)DKVQEEIWK.K	Y	29.43	1502.74	13	-0.2	752.375	2	55.65	4590000	1	11604	2	819	831			251.94	55	10100000000	260	255	929	73702	Hic74 [Hyriopsis cumingii]
HavC	1176704634	K.KIDC(+57.02)EEDD(-.98).N	Y	29.42	1021.4	8	0.3	511.709	2	20.31	11300000	2	3850	3	832	839	Carbamidomethylation; Amidation	C4:Carbamidomethylation:1000.00;D8:Amidation:1000.00	251.94	55	10100000000	260	255	929	73702	Hic74 [Hyriopsis cumingii]
HavC	1176704634	D.KVQEEIWK.K	Y	29.41	1058.58	8	0	530.295	2	47	18500000	1	9737	5	824	831			251.94	55	10100000000	260	255	929	73702	Hic74 [Hyriopsis cumingii]
HavC	1176704634	L.GLASVLGDVDGLGGL.S	Y	29.38	1341.71	15	1	671.865	2	107.07	4200000	1	22797	4	121	135			251.94	55	10100000000	260	255	929	73702	Hic74 [Hyriopsis cumingii]
HavC	1176704634	G.GSGGSGGSGGSGQ(+.98)G(sub R)DKVQEEI.W	Y	29.35	1849.79	21	1	925.904	2	53.24	2300000	2	10913	1	809	829	Deamidation (NQ)	Q13:Deamidation (NQ):72.40	251.94	55	10100000000	260	255	929	73702	Hic74 [Hyriopsis cumingii]
HavC	1176704634	N.PIAAAAAAAAAAASG.S	Y	29.34	1153.61	15	-1.1	577.811	2	77.12	1640000	2	16043	2	767	781			251.94	55	10100000000	260	255	929	73702	Hic74 [Hyriopsis cumingii]
HavC	1176704634	G.GSGQG(sub R)DKVQEEIWK.K	Y	29.2	1559.76	14	0.2	780.886	2	55.32	1270000	1	11536	1	818	831			251.94	55	10100000000	260	255	929	73702	Hic74 [Hyriopsis cumingii]
HavC	1176704634	A.AAAAAAAGGDGDALAASAAR(+15.99).R	Y	29.12	1643.79	20	-0.2	822.9	2	54.92	514000	1	11451	1	726	745	Oxidation or Hydroxylation	R20:Oxidation or Hydroxylation:24.34	251.94	55	10100000000	260	255	929	73702	Hic74 [Hyriopsis cumingii]
HavC	1176704634	R.VPILGASAAASAAAS(+58.03)A.G	Y	28.95	1384.74	16	-0.3	693.379	2	79.36	0	1	16715	1	62	77	2 3-dihydro-2 2-dimethyl-7-benzofuranol N-methyl carbamate	S15:2 3-dihydro-2 2-dimethyl-7-benzofuranol N-methyl carbamate:28.70	251.94	55	10100000000	260	255	929	73702	Hic74 [Hyriopsis cumingii]
HavC	1176704634	S.GGSGGSGGSGQG(sub R)DKVQ(+.98)EEI.W	Y	28.94	1705.74	19	1.9	853.878	2	51.82	1470000	1	10783	1	811	829	Deamidation (NQ)	Q16:Deamidation (NQ):34.44	251.94	55	10100000000	260	255	929	73702	Hic74 [Hyriopsis cumingii]
HavC	1176704634	R.DKVQ(+.98)EEIWK.K	Y	28.9	1174.59	9	0.3	588.301	2	59.51	46600000	1	12437	5	823	831	Deamidation (NQ)	Q4:Deamidation (NQ):1000.00	251.94	55	10100000000	260	255	929	73702	Hic74 [Hyriopsis cumingii]
HavC	1176704634	S.GGSGGSGQG(sub R)DKVQ(+.98)EEI.W	Y	28.89	1504.66	16	2.3	753.341	2	51.89	12000000	1	10800	2	814	829	Deamidation (NQ)	Q13:Deamidation (NQ):60.87	251.94	55	10100000000	260	255	929	73702	Hic74 [Hyriopsis cumingii]
HavC	1176704634	A.AAEVVDEFGIGA.L	Y	28.84	1176.57	12	0.4	589.291	2	88.28	1650000	1	18656	2	93	104			251.94	55	10100000000	260	255	929	73702	Hic74 [Hyriopsis cumingii]
HavC	1176704634	K.IDC(+57.02)EEDDNGKYYK.R	Y	28.84	1647.67	13	-0.8	824.843	2	41.65	1050000	2	8416	1	833	845	Carbamidomethylation	C3:Carbamidomethylation:1000.00	251.94	55	10100000000	260	255	929	73702	Hic74 [Hyriopsis cumingii]
HavC	1176704634	K.IDC(+57.02)EEDDNGKY.Y	Y	28.81	1356.51	11	1.8	679.265	2	43.56	894000	2	8836	1	833	843	Carbamidomethylation	C3:Carbamidomethylation:1000.00	251.94	55	10100000000	260	255	929	73702	Hic74 [Hyriopsis cumingii]
HavC	1176704634	G.GSGGSGQG(sub R)DKVQEEI.W	Y	28.78	1446.66	15	0.5	724.337	2	47.87	4770000	1	9922	2	815	829			251.94	55	10100000000	260	255	929	73702	Hic74 [Hyriopsis cumingii]
HavC	1176704634	C.EEDDNGKYYKRVV.K	Y	28.77	1613.77	13	-2.4	807.89	2	47.81	394000	2	9756	1	836	848			251.94	55	10100000000	260	255	929	73702	Hic74 [Hyriopsis cumingii]
HavC	1176704634	D.N(+.98)GKYYKRVV.K	Y	28.73	1126.61	9	-0.5	376.545	3	33.97	23000000	1	6867	6	840	848	Deamidation (NQ)	N1:Deamidation (NQ):1000.00	251.94	55	10100000000	260	255	929	73702	Hic74 [Hyriopsis cumingii]
HavC	1176704634	G.GLSVGGLAG(sub S)LGLGGFG.G	Y	28.73	1330.72	16	-1.4	666.369	2	108.2	732000	1	23050	1	155	170			251.94	55	10100000000	260	255	929	73702	Hic74 [Hyriopsis cumingii]
HavC	1176704634	G.GSGGSGGSGGSGQ(+.98)G(sub R)DKVQ(+.98)EEI.W	Y	28.58	1850.78	21	0.1	926.396	2	54.61	473000	1	11386	1	809	829	Deamidation (NQ)	Q13:Deamidation (NQ):1000.00;Q18:Deamidation (NQ):1000.00	251.94	55	10100000000	260	255	929	73702	Hic74 [Hyriopsis cumingii]
HavC	1176704634	K.IDC(+57.02)EEDDN(+.98)GKYYKRVV.K	Y	28.57	2002.89	16	0.5	668.639	3	57.87	10400000	2	11895	4	833	848	Carbamidomethylation; Deamidation (NQ)	C3:Carbamidomethylation:1000.00;N8:Deamidation (NQ):1000.00	251.94	55	10100000000	260	255	929	73702	Hic74 [Hyriopsis cumingii]
HavC	1176704634	L.A(+43.01)GAGAGAGAGGAGA.L	Y	28.53	957.426	14	0.5	479.721	2	20.07	5450000	1	3836	1	106	119	Carbamylation	A1:Carbamylation:1000.00	251.94	55	10100000000	260	255	929	73702	Hic74 [Hyriopsis cumingii]
HavC	1176704634	A.SVLGDVDGL.G	Y	28.48	873.444	9	-1.9	874.45	1	90.29	60700000	1	19091	5	124	132			251.94	55	10100000000	260	255	929	73702	Hic74 [Hyriopsis cumingii]
HavC	1176704634	V.QEEIW(+31.99)KK.I	Y	28.46	991.497	7	1	496.757	2	20.59	9720000	2	3910	1	826	832	Dihydroxy	W5:Dihydroxy:27.96	251.94	55	10100000000	260	255	929	73702	Hic74 [Hyriopsis cumingii]
HavC	1176704634	A.AAEVVDEFGIGAL.A	Y	28.39	1289.65	13	-1.6	645.831	2	100.47	809000	1	21328	2	93	105			251.94	55	10100000000	260	255	929	73702	Hic74 [Hyriopsis cumingii]
HavC	1176704634	A.SVLGDVDGLGGLS(+17.03).A	Y	28.39	1204.63	13	0.3	603.322	2	92.73	74600000	1	19623	4	124	136	Replacement of proton with ammonium ion	S13:Replacement of proton with ammonium ion:34.80	251.94	55	10100000000	260	255	929	73702	Hic74 [Hyriopsis cumingii]
HavC	1176704634	D.K(+172.05)VQEEIWKKI.D	Y	28.37	1471.81	10	-1.4	491.609	3	62.24	777000	1	13022	1	824	833	Menadione hydroquinone derivative	K1:Menadione hydroquinone derivative:100.34	251.94	55	10100000000	260	255	929	73702	Hic74 [Hyriopsis cumingii]
HavC	1176704634	K.IDG(sub C)EEDDN(+.98)GKYYK.R	Y	28.36	1545.65	13	-1.6	773.83	2	42.93	3110000	1	8844	4	833	845	Deamidation (NQ)	N8:Deamidation (NQ):1000.00	251.94	55	10100000000	260	255	929	73702	Hic74 [Hyriopsis cumingii]
HavC	1176704634	G.SGGSGQ(+.98)G(sub R)DKVQ(+.98)EEIWK.K	Y	28.34	1705.78	16	0.7	853.898	2	62.79	3290000	2	12942	2	816	831	Deamidation (NQ)	Q6:Deamidation (NQ):1000.00;Q11:Deamidation (NQ):1000.00	251.94	55	10100000000	260	255	929	73702	Hic74 [Hyriopsis cumingii]
HavC	1176704634	G.S(sub A)AAAAAAAAAAAEVVDEFGIGALAGV(sub A).G	Y	28.33	2243.14	26	1.8	748.723	3	108.4	225000	1	23094	2	83	108			251.94	55	10100000000	260	255	929	73702	Hic74 [Hyriopsis cumingii]
HavC	1176704634	A.AAAAAGGGGFS(-15.99)GAGAGAGARA.N	Y	28.32	1558.76	21	-1.2	780.386	2	52.34	4500000	1	10898	1	339	359	Deoxy	S11:Deoxy:1000.00	251.94	55	10100000000	260	255	929	73702	Hic74 [Hyriopsis cumingii]
HavC	1176704634	G.SGGSGGSGQ(+.98)G(sub R)DKVQ(+.98)EEI.W	Y	28.28	1592.68	17	-1.2	797.346	2	56.21	19700000	2	11544	2	813	829	Deamidation (NQ)	Q9:Deamidation (NQ):1000.00;Q14:Deamidation (NQ):1000.00	251.94	55	10100000000	260	255	929	73702	Hic74 [Hyriopsis cumingii]
HavC	1176704634	E.DDN(+.98)GKYYKRV.V	Y	28.28	1257.6	10	-0.4	629.807	2	33.03	2860000	2	6554	2	838	847	Deamidation (NQ)	N3:Deamidation (NQ):1000.00	251.94	55	10100000000	260	255	929	73702	Hic74 [Hyriopsis cumingii]
HavC	1176704634	K.VQEEIWK(+27.99)K.I	Y	28.24	1086.57	8	-0.4	544.293	2	61.39	11500000	2	12648	1	825	832	Formylation	K7:Formylation:10.11	251.94	55	10100000000	260	255	929	73702	Hic74 [Hyriopsis cumingii]
HavC	1176704634	G.GLSVGGLAG(sub S)LGLGGF.G	Y	28.18	1273.7	15	0.4	1274.71	1	110.21	144000	1	23497	1	155	169			251.94	55	10100000000	260	255	929	73702	Hic74 [Hyriopsis cumingii]
HavC	1176704634	S.GGSGQ(+.98)G(sub R)DKVQEEIWK.K	Y	28.16	1617.76	15	-0.8	809.888	2	57.27	4260000	1	11953	3	817	831	Deamidation (NQ)	Q5:Deamidation (NQ):105.53	251.94	55	10100000000	260	255	929	73702	Hic74 [Hyriopsis cumingii]
HavC	1176704634	S.GGSGGSGGSGQ(+.98)G(sub R)DKVQ(+.98)EEI.W	Y	28.1	1706.72	19	-0.7	854.368	2	54.53	4830000	1	11370	2	811	829	Deamidation (NQ)	Q11:Deamidation (NQ):1000.00;Q16:Deamidation (NQ):1000.00	251.94	55	10100000000	260	255	929	73702	Hic74 [Hyriopsis cumingii]
HavC	1176704634	G.SGGSGQRDKVQEEIWK(+14.02)K.I	Y	27.95	1945	17	0.3	649.341	3	62.75	891000	1	13131	1	816	832	Methylation(KR)	K16:Methylation(KR):7.21	251.94	55	10100000000	260	255	929	73702	Hic74 [Hyriopsis cumingii]
HavC	1176704634	K.VQEEIW(+3.99)KK.I	Y	27.94	1062.57	8	-0.1	532.293	2	41.45	20200000	2	8373	2	825	832	Tryptophan oxidation to kynurenin	W6:Tryptophan oxidation to kynurenin:1000.00	251.94	55	10100000000	260	255	929	73702	Hic74 [Hyriopsis cumingii]
HavC	1176704634	S.GGGGGS(sub A)GGSGGSGGSGGSGGSGQRDK.V	Y	27.92	1979.83	26	-6	990.915	2	18.74	1790000	2	3517	1	799	824			251.94	55	10100000000	260	255	929	73702	Hic74 [Hyriopsis cumingii]
HavC	1176704634	G.SAAAAAAAAAAANR.A	Y	27.89	1156.59	14	-1.5	579.304	2	52.13	2220000	2	10676	1	514	527			251.94	55	10100000000	260	255	929	73702	Hic74 [Hyriopsis cumingii]
HavC	1176704634	A.AAAAAAGGGGFS(-15.99)GAGAGAGARA.N	Y	27.88	1629.8	22	-0.6	815.905	2	54.06	1260000	1	11269	1	338	359	Deoxy	S12:Deoxy:1000.00	251.94	55	10100000000	260	255	929	73702	Hic74 [Hyriopsis cumingii]
HavC	1176704634	V.QEEIW(+15.99)KKI.D	Y	27.86	1088.59	8	-0.5	545.3	2	57.37	8820000	2	11789	2	826	833	Oxidation (HW)	W5:Oxidation (HW):1000.00	251.94	55	10100000000	260	255	929	73702	Hic74 [Hyriopsis cumingii]
HavC	1176704634	K.IDC(+57.02)EEDDNGKYYKRVV.K	Y	27.84	2001.91	16	0.3	668.311	3	54.35	0	2	11151	1	833	848	Carbamidomethylation	C3:Carbamidomethylation:1000.00	251.94	55	10100000000	260	255	929	73702	Hic74 [Hyriopsis cumingii]
HavC	1176704634	G.GSGGSGGSGGSGQ(+.98)RDK.V	Y	27.82	1350.58	16	-7.9	676.29	2	17.74	16100000	1	3326	2	809	824	Deamidation (NQ)	Q13:Deamidation (NQ):1000.00	251.94	55	10100000000	260	255	929	73702	Hic74 [Hyriopsis cumingii]
HavC	1176704634	K.IDC(+57.02)EEDDN(+.98)GKY.Y	Y	27.79	1357.5	11	0.3	679.756	2	48.18	7100000	2	9836	2	833	843	Carbamidomethylation; Deamidation (NQ)	C3:Carbamidomethylation:1000.00;N8:Deamidation (NQ):1000.00	251.94	55	10100000000	260	255	929	73702	Hic74 [Hyriopsis cumingii]
HavC	1176704634	K.V(+42.01)QEEIWK.K	Y	27.76	972.492	7	-0.2	487.253	2	74.33	4580000	2	15431	1	825	831	Acetylation (N-term)	V1:Acetylation (N-term):1000.00	251.94	55	10100000000	260	255	929	73702	Hic74 [Hyriopsis cumingii]
HavC	1176704634	A.LGLGGL(sub V)GGGGLDLDTDTL.L	Y	27.75	1642.84	18	-2.3	822.426	2	105.19	664000	1	22379	1	284	301			251.94	55	10100000000	260	255	929	73702	Hic74 [Hyriopsis cumingii]
HavC	1176704634	G.GSGQ(+.98)G(sub R)DKVQ(+.98)EEIWK.K	Y	27.7	1561.73	14	-0.6	781.87	2	63.23	8630000	2	13035	2	818	831	Deamidation (NQ)	Q4:Deamidation (NQ):1000.00;Q9:Deamidation (NQ):1000.00	251.94	55	10100000000	260	255	929	73702	Hic74 [Hyriopsis cumingii]
HavC	1176704634	A.GALGLASVLGDVDGLG.G	Y	27.66	1412.75	16	-1.9	707.381	2	111.95	2350000	2	23794	1	118	133			251.94	55	10100000000	260	255	929	73702	Hic74 [Hyriopsis cumingii]
HavC	1176704634	V.QEEIW(+31.99)KKI.D	Y	27.65	1104.58	8	-0.2	553.298	2	52.4	3360000	2	10734	1	826	833	Dihydroxy	W5:Dihydroxy:9.34	251.94	55	10100000000	260	255	929	73702	Hic74 [Hyriopsis cumingii]
HavC	1176704634	A.SVLGDVD(+21.98)GLGGL.S	Y	27.61	1122.55	12	0.6	562.284	2	97.69	277000	1	20713	2	124	135	Sodium adduct	D7:Sodium adduct:0.00	251.94	55	10100000000	260	255	929	73702	Hic74 [Hyriopsis cumingii]
HavC	1176704634	A.SVLGDVDGLGGLSAL(+17.03).G	Y	27.59	1388.75	15	-1	695.382	2	106.33	468000	1	22634	1	124	138	Replacement of proton with ammonium ion	L15:Replacement of proton with ammonium ion:17.68	251.94	55	10100000000	260	255	929	73702	Hic74 [Hyriopsis cumingii]
HavC	1176704634	R.AAAAAAAAAAAAAIR(+28.03)N.G	Y	27.56	1352.75	16	0.8	677.384	2	75.14	830000	2	15610	1	748	763	Dimethylation(KR)	R15:Dimethylation(KR):1000.00	251.94	55	10100000000	260	255	929	73702	Hic74 [Hyriopsis cumingii]
HavC	1176704634	R.DKVQEEIW(+3.99)K.K	Y	27.55	1177.6	9	-0.1	589.806	2	56.3	1540000	2	11563	1	823	831	Tryptophan oxidation to kynurenin	W8:Tryptophan oxidation to kynurenin:1000.00	251.94	55	10100000000	260	255	929	73702	Hic74 [Hyriopsis cumingii]
HavC	1176704634	G.GSAAAAAAAAAASAS(+154.14).R	Y	27.55	1271.67	15	8.5	636.849	2	72	6290000	2	14914	1	379	393	Decanoyl	S15:Decanoyl:5.03	251.94	55	10100000000	260	255	929	73702	Hic74 [Hyriopsis cumingii]
HavC	1176704634	G.A(+71.04)GAGAGGAGALGLA.S	Y	27.47	1083.57	14	-0.6	542.791	2	74.73	1020000	2	15520	1	110	123	Propionamide (K X@N-term)	A1:Propionamide (K X@N-term):1000.00	251.94	55	10100000000	260	255	929	73702	Hic74 [Hyriopsis cumingii]
HavC	1176704634	A.AAAAAGGDGDALAASAAR(+15.99).R	Y	27.45	1501.71	18	-0.4	751.863	2	51.04	753000	2	10443	1	728	745	Oxidation or Hydroxylation	R18:Oxidation or Hydroxylation:39.72	251.94	55	10100000000	260	255	929	73702	Hic74 [Hyriopsis cumingii]
HavC	1176704634	K.VQEEIWK(+43.01)K.I	Y	27.32	1101.58	8	0.3	551.798	2	60.54	57300000	2	12465	2	825	832	Carbamylation	K7:Carbamylation:10.11	251.94	55	10100000000	260	255	929	73702	Hic74 [Hyriopsis cumingii]
HavC	1176704634	Q.E(-18.01)EIWKKI.D	Y	27.3	926.523	7	-0.3	464.268	2	73.77	26300000	2	15306	1	827	833	Pyro-glu from E	E1:Pyro-glu from E:1000.00	251.94	55	10100000000	260	255	929	73702	Hic74 [Hyriopsis cumingii]
HavC	1176704634	S.GGSGGSGQ(+.98)G(sub R)DKVQEEI.W	Y	27.3	1504.66	16	0.3	753.34	2	53.16	8200000	2	10896	1	814	829	Deamidation (NQ)	Q8:Deamidation (NQ):62.41	251.94	55	10100000000	260	255	929	73702	Hic74 [Hyriopsis cumingii]
HavC	1176704634	A.W(sub A)P(sub A)AAAAAAEVVDEFGIGALAGV(sub A).G	Y	27.22	2084.06	22	-2.5	1043.03	2	112.17	0	1	23929	1	87	108			251.94	55	10100000000	260	255	929	73702	Hic74 [Hyriopsis cumingii]
HavC	1176704634	V.Q(-17.03)EEIWKKID.C	Y	27.22	1170.59	9	5.9	586.307	2	74.35	225000	1	15632	1	826	834	Pyro-glu from Q	Q1:Pyro-glu from Q:1000.00	251.94	55	10100000000	260	255	929	73702	Hic74 [Hyriopsis cumingii]
HavC	1176704634	W.C(+57.02)AVGTGFSPSDC(+57.02)DC(+57.02)TLR(+.98).V	Y	27.22	1902.75	17	7	952.391	2	68.25	0	2	14107	1	45	61	Carbamidomethylation; Deamidation (R)	C1:Carbamidomethylation:1000.00;C12:Carbamidomethylation:1000.00;C14:Carbamidomethylation:1000.00;R17:Deamidation (R):1000.00	251.94	55	10100000000	260	255	929	73702	Hic74 [Hyriopsis cumingii]
HavC	1176704634	A.AAAAAAAAAAIR.N	Y	27.21	997.567	12	-0.3	499.791	2	54.84	2990000	2	11253	1	751	762			251.94	55	10100000000	260	255	929	73702	Hic74 [Hyriopsis cumingii]
HavC	1176704634	G.FGGGAGAGAGAGA.G	Y	27.21	919.415	13	1.6	460.715	2	54.65	16000000	1	11394	1	222	234			251.94	55	10100000000	260	255	929	73702	Hic74 [Hyriopsis cumingii]
HavC	1176704634	G.GGS(sub A)GGSGGSGGSGGSGGSGQRDK.V	Y	27.07	1808.76	23	-7.2	905.382	2	18.26	3740000	2	3415	1	802	824			251.94	55	10100000000	260	255	929	73702	Hic74 [Hyriopsis cumingii]
HavC	1176704634	I.WKKIDC(+57.02)EE.D	Y	27.02	1106.51	8	1.1	554.261	2	34.56	9810000	2	6876	2	830	837	Carbamidomethylation	C6:Carbamidomethylation:1000.00	251.94	55	10100000000	260	255	929	73702	Hic74 [Hyriopsis cumingii]
HavC	1176704634	G.GSGQG(sub R)DKVQ(+.98)EEIWK.K	Y	26.91	1560.74	14	3	781.381	2	58.48	2730000	1	12215	1	818	831	Deamidation (NQ)	Q9:Deamidation (NQ):105.53	251.94	55	10100000000	260	255	929	73702	Hic74 [Hyriopsis cumingii]
HavC	1176704634	C.EEDDN(+.98)GKYYKRVVKV	Y	26.89	1841.92	15	-0.2	614.979	3	53.53	13200000	2	10973	1	836	850	Deamidation (NQ)	N5:Deamidation (NQ):1000.00	251.94	55	10100000000	260	255	929	73702	Hic74 [Hyriopsis cumingii]
HavC	1176704634	K.KIDC(+57.02)EEDDN(+.98).G	Y	26.87	1137.41	9	-0.1	569.714	2	24.42	67500000	2	4720	6	832	840	Carbamidomethylation; Deamidation (NQ)	C4:Carbamidomethylation:1000.00;N9:Deamidation (NQ):1000.00	251.94	55	10100000000	260	255	929	73702	Hic74 [Hyriopsis cumingii]
HavC	1176704634	S.GGSGQG(sub R)DKVQ(+.98)EEIWK.K	Y	26.86	1617.76	15	0.7	809.89	2	58.33	1690000	1	12182	2	817	831	Deamidation (NQ)	Q10:Deamidation (NQ):79.02	251.94	55	10100000000	260	255	929	73702	Hic74 [Hyriopsis cumingii]
HavC	1176704634	E.GGDGGAGFGGGAGA.G	Y	26.84	1006.41	14	1	504.213	2	54.85	2640000	2	11257	1	215	228			251.94	55	10100000000	260	255	929	73702	Hic74 [Hyriopsis cumingii]
HavC	1176704634	A.AAAEVVDE(+17.03)FGIGA.L	Y	26.82	1264.63	13	-0.7	633.322	2	90.07	1030000	1	19045	1	92	104	Replacement of proton with ammonium ion	E8:Replacement of proton with ammonium ion:10.11	251.94	55	10100000000	260	255	929	73702	Hic74 [Hyriopsis cumingii]
HavC	1176704634	A.LGLASVLGDVDGLGGL.S	Y	26.8	1454.8	16	0.2	728.406	2	111.83	0	1	23856	1	120	135			251.94	55	10100000000	260	255	929	73702	Hic74 [Hyriopsis cumingii]
HavC	1176704634	K.KIDA(sub C)EEDDN(+.98)GK.Y	Y	26.79	1233.54	11	2.4	617.777	2	20.08	3860000	2	3800	1	832	842	Deamidation (NQ)	N9:Deamidation (NQ):1000.00	251.94	55	10100000000	260	255	929	73702	Hic74 [Hyriopsis cumingii]
HavC	1176704634	A.AAAGGGGFS(-15.99)GAGAGAGARA.N	Y	26.77	1416.69	19	1.7	709.351	2	49.61	7090000	1	10302	2	341	359	Deoxy	S9:Deoxy:1000.00	251.94	55	10100000000	260	255	929	73702	Hic74 [Hyriopsis cumingii]
HavC	1176704634	G.SGQG(sub R)DKVQ(+.98)EEIWK.K	Y	26.7	1503.72	13	-1.2	752.867	2	60.83	18800000	2	12527	2	819	831	Deamidation (NQ)	Q8:Deamidation (NQ):139.79	251.94	55	10100000000	260	255	929	73702	Hic74 [Hyriopsis cumingii]
HavC	1176704634	F.GAGAGAGAGAGAGA.G	N	26.68	914.42	14	-1.6	458.217	2	26.37	10500000	2	5134	2	245	258			251.94	55	10100000000	260	255	929	73702	Hic74 [Hyriopsis cumingii]
HavC	1176704634	G.GSGGSGGSGGSGQRDK.V	Y	26.62	1349.59	16	-9.6	675.797	2	17.46	5010000	2	3243	1	809	824			251.94	55	10100000000	260	255	929	73702	Hic74 [Hyriopsis cumingii]
HavC	1176704634	N.GKYYKRVV.K	Y	26.57	1011.59	8	0.9	506.801	2	24.38	43000000	1	4773	4	841	848			251.94	55	10100000000	260	255	929	73702	Hic74 [Hyriopsis cumingii]
HavC	1176704634	K.KIDC(+57.02)EEDDN.G	Y	26.55	1136.43	9	-0.1	569.222	2	23.36	1610000	2	4497	3	832	840	Carbamidomethylation	C4:Carbamidomethylation:1000.00	251.94	55	10100000000	260	255	929	73702	Hic74 [Hyriopsis cumingii]
HavC	1176704634	G.GSGGSGGSGQ(+.98)G(sub R)DKVQ(+.98)EEI.W	Y	26.49	1649.7	18	-1.3	825.857	2	56.2	7510000	2	11541	2	812	829	Deamidation (NQ)	Q10:Deamidation (NQ):1000.00;Q15:Deamidation (NQ):1000.00	251.94	55	10100000000	260	255	929	73702	Hic74 [Hyriopsis cumingii]
HavC	1176704634	I.DC(+57.02)EEDDNGKY.Y	Y	26.48	1243.43	10	0.5	622.722	2	29.83	2940000	2	5870	1	834	843	Carbamidomethylation	C2:Carbamidomethylation:1000.00	251.94	55	10100000000	260	255	929	73702	Hic74 [Hyriopsis cumingii]
HavC	1176704634	G.AGALGLASVLGDVD.G	Y	26.48	1256.66	14	-1.1	629.337	2	105.42	1260000	2	22363	1	117	130			251.94	55	10100000000	260	255	929	73702	Hic74 [Hyriopsis cumingii]
HavC	1176704634	G.GSGGSGGSGQG(sub R)DKVQ(+.98)EEI.W	Y	26.46	1648.72	18	-1.2	825.365	2	54.51	1270000	2	11185	1	812	829	Deamidation (NQ)	Q15:Deamidation (NQ):70.86	251.94	55	10100000000	260	255	929	73702	Hic74 [Hyriopsis cumingii]
HavC	1176704634	K.VQEEIW(+3.99)K.K	Y	26.43	934.476	7	1.5	468.246	2	54.85	64300000	1	11437	2	825	831	Tryptophan oxidation to kynurenin	W6:Tryptophan oxidation to kynurenin:1000.00	251.94	55	10100000000	260	255	929	73702	Hic74 [Hyriopsis cumingii]
HavC	1176704634	I.DC(+57.02)EEDDN(+.98)GKY.Y	Y	26.42	1244.41	10	-3.7	623.212	2	32.8	6320000	2	6506	4	834	843	Carbamidomethylation; Deamidation (NQ)	C2:Carbamidomethylation:1000.00;N7:Deamidation (NQ):1000.00	251.94	55	10100000000	260	255	929	73702	Hic74 [Hyriopsis cumingii]
HavC	1176704634	K.IDC(+57.02)EEDDNGK.Y	Y	26.4	1193.45	10	0.1	597.733	2	20.41	243000000	2	3870	2	833	842	Carbamidomethylation	C3:Carbamidomethylation:1000.00	251.94	55	10100000000	260	255	929	73702	Hic74 [Hyriopsis cumingii]
HavC	1176704634	G.GS(sub A)GGSGGSGGSGGSGGSGQRDK.V	Y	26.39	1751.74	22	-9.1	876.87	2	18.29	3870000	2	3421	1	803	824			251.94	55	10100000000	260	255	929	73702	Hic74 [Hyriopsis cumingii]
HavC	1176704634	A.AAAAGGGGFS(-15.99)GAGAGAGARA.N	Y	26.39	1487.72	20	1.1	744.87	2	50.67	5310000	1	10535	2	340	359	Deoxy	S10:Deoxy:1000.00	251.94	55	10100000000	260	255	929	73702	Hic74 [Hyriopsis cumingii]
HavC	1176704634	K.VQEEIW(+13.98)KK.I	Y	26.26	1072.56	8	0.7	537.285	2	34.31	41500000	2	6824	3	825	832	Tryptophan oxidation to oxolactone	W6:Tryptophan oxidation to oxolactone:1000.00	251.94	55	10100000000	260	255	929	73702	Hic74 [Hyriopsis cumingii]
HavC	1176704634	K.KIDG(sub C)EEDDNGK.Y	Y	26.24	1218.54	11	0.2	610.276	2	16.29	3340000	2	2988	1	832	842			251.94	55	10100000000	260	255	929	73702	Hic74 [Hyriopsis cumingii]
HavC	1176704634	G.SGGSGGSGGSGQRDK.V	Y	26.21	1292.57	15	-8.6	647.287	2	17.28	11900000	2	3205	1	810	824			251.94	55	10100000000	260	255	929	73702	Hic74 [Hyriopsis cumingii]
HavC	1176704634	K.IDC(+57.02)EEDDNGK(+58.01)YYK.R	Y	26.19	1705.68	13	1.4	853.847	2	47.82	182000	2	9758	1	833	845	Carbamidomethylation; Carboxymethyl (KW X@N-term)	C3:Carbamidomethylation:1000.00;K10:Carboxymethyl (KW X@N-term):20.70	251.94	55	10100000000	260	255	929	73702	Hic74 [Hyriopsis cumingii]
HavC	1176704634	S.GGSGGSGGSGGSGQ(+.98)RDK.V	Y	26.17	1407.6	17	-7.9	704.8	2	18.94	7050000	2	3560	1	808	824	Deamidation (NQ)	Q14:Deamidation (NQ):1000.00	251.94	55	10100000000	260	255	929	73702	Hic74 [Hyriopsis cumingii]
HavC	1176704634	D.KVQ(+.98)EEIWK.K	Y	26.16	1059.56	8	0.7	530.788	2	50.76	15700000	1	10555	2	824	831	Deamidation (NQ)	Q3:Deamidation (NQ):1000.00	251.94	55	10100000000	260	255	929	73702	Hic74 [Hyriopsis cumingii]
HavC	1176704634	G.GGFGAGAGAGAGAGA.G	Y	26.14	1047.47	15	0.8	524.744	2	57.1	10000000	1	11918	1	242	256			251.94	55	10100000000	260	255	929	73702	Hic74 [Hyriopsis cumingii]
HavC	1176704634	G.DGDALAASAAR(+15.99).R	Y	26.14	1032.48	11	0.8	517.25	2	41.1	1730000	2	8296	2	735	745	Oxidation or Hydroxylation	R11:Oxidation or Hydroxylation:98.53	251.94	55	10100000000	260	255	929	73702	Hic74 [Hyriopsis cumingii]
HavC	1176704634	A.SVLGDVDGLGGLSALGLGG(+17.03).G	Y	26.12	1672.9	19	-1.1	837.456	2	110.55	257000	1	23573	1	124	142	Replacement of proton with ammonium ion	G19:Replacement of proton with ammonium ion:32.72	251.94	55	10100000000	260	255	929	73702	Hic74 [Hyriopsis cumingii]
HavC	1176704634	G.GS(sub A)AAAAAAAAAAAEVVDEFGIGALAGV(sub A).G	Y	26.07	2300.16	27	5.3	767.733	3	111.74	2100000	2	23751	1	82	108			251.94	55	10100000000	260	255	929	73702	Hic74 [Hyriopsis cumingii]
HavC	1176704634	G.SGGGGGS(sub A)GGSGGSGGSGGSGGSGQRDK.V	Y	26.03	2066.86	27	-5.2	1034.43	2	17.54	3510000	1	3283	2	798	824			251.94	55	10100000000	260	255	929	73702	Hic74 [Hyriopsis cumingii]
HavC	1176704634	A.A(+43.01)AAAAAAAIR.N	Y	25.99	898.498	10	1.8	450.257	2	74.42	3340000	2	15452	1	753	762	Carbamylation	A1:Carbamylation:1000.00	251.94	55	10100000000	260	255	929	73702	Hic74 [Hyriopsis cumingii]
HavC	1176704634	A.GGDGDALAASAAR(+15.99).R	Y	25.99	1146.53	13	-5	574.268	2	43.6	1730000	2	8846	1	733	745	Oxidation or Hydroxylation	R13:Oxidation or Hydroxylation:49.35	251.94	55	10100000000	260	255	929	73702	Hic74 [Hyriopsis cumingii]
HavC	1176704634	I.WKKIDC(+57.02)EED.D	Y	25.98	1221.53	9	0.1	611.774	2	36.57	5140000	2	7311	2	830	838	Carbamidomethylation	C6:Carbamidomethylation:1000.00	251.94	55	10100000000	260	255	929	73702	Hic74 [Hyriopsis cumingii]
HavC	1176704634	A.SVLGDVD(+17.03)GLGGL.S	Y	25.96	1117.6	12	1.6	559.807	2	98.33	60800000	1	20854	4	124	135	Replacement of proton with ammonium ion	D7:Replacement of proton with ammonium ion:9.40	251.94	55	10100000000	260	255	929	73702	Hic74 [Hyriopsis cumingii]
HavC	1176704634	F.GGAAS(sub A)AAAAAAAAAEVVDEFGIGALAGV(sub A).G	Y	25.92	2357.19	28	3.5	786.739	3	111.83	771000	2	23768	1	81	108			251.94	55	10100000000	260	255	929	73702	Hic74 [Hyriopsis cumingii]
HavC	1176704634	G.GSGGSGQG(sub R)DKVQ(+.98)EEI.W	Y	25.91	1447.64	15	-0.4	724.828	2	54.47	26400000	2	11177	3	815	829	Deamidation (NQ)	Q12:Deamidation (NQ):64.28	251.94	55	10100000000	260	255	929	73702	Hic74 [Hyriopsis cumingii]
HavC	1176704634	A.AAAAAAS(sub A)AAAEVVDEFGIGALAGV(sub A).G	Y	25.88	2101.07	24	2.7	701.365	3	104.65	114000	1	22259	1	85	108			251.94	55	10100000000	260	255	929	73702	Hic74 [Hyriopsis cumingii]
HavC	1176704634	A.AAAAAAAAAIR.N	Y	25.79	926.53	11	0.8	464.272	2	46.14	11400000	1	9549	3	752	762			251.94	55	10100000000	260	255	929	73702	Hic74 [Hyriopsis cumingii]
HavC	1176704634	I.DC(+57.02)EEDDN(-17.03)GKYY.K	Y	25.73	1389.47	11	-1.2	695.74	2	55.99	1820000	2	11497	1	834	844	Carbamidomethylation; Ammonia-loss (N)	C2:Carbamidomethylation:1000.00;N7:Ammonia-loss (N):1000.00	251.94	55	10100000000	260	255	929	73702	Hic74 [Hyriopsis cumingii]
HavC	1176704634	G.GSGGSGQ(+.98)G(sub R)DKVQ(+.98)EEIWK.K	Y	25.72	1762.8	17	0.3	882.408	2	62.72	1990000	2	12928	2	815	831	Deamidation (NQ)	Q7:Deamidation (NQ):1000.00;Q12:Deamidation (NQ):1000.00	251.94	55	10100000000	260	255	929	73702	Hic74 [Hyriopsis cumingii]
HavC	1176704634	S.GGSGGSGGSGGSGQRDK.V	Y	25.71	1406.61	17	-8.5	704.308	2	17.72	4600000	2	3300	1	808	824			251.94	55	10100000000	260	255	929	73702	Hic74 [Hyriopsis cumingii]
HavC	1176704634	G.SGGSGGSGGSGQ(+.98)RDK.V	Y	25.64	1293.55	15	-8.6	647.779	2	17.62	29500000	1	3300	2	810	824	Deamidation (NQ)	Q12:Deamidation (NQ):1000.00	251.94	55	10100000000	260	255	929	73702	Hic74 [Hyriopsis cumingii]
HavC	1176704634	A.SVLGDVDGLGGLSAL(-.98).G	Y	25.6	1370.74	15	3.1	686.38	2	103.57	87500	1	22017	1	124	138	Amidation	L15:Amidation:1000.00	251.94	55	10100000000	260	255	929	73702	Hic74 [Hyriopsis cumingii]
HavC	1176704634	A.AAAAAAAAAGR(+14.02)GNA.A	Y	25.59	1126.58	14	-0.9	564.299	2	41.01	2070000	1	8422	1	469	482	Methylation(KR)	R11:Methylation(KR):1000.00	251.94	55	10100000000	260	255	929	73702	Hic74 [Hyriopsis cumingii]
HavC	1176704634	Y.SAAAAAAAAAAASR(+31.99).R	N	25.59	1161.57	14	-1.4	581.793	2	38.63	1550000	1	7896	1	704	717	Dihydroxy	R14:Dihydroxy:1000.00	251.94	55	10100000000	260	255	929	73702	Hic74 [Hyriopsis cumingii]
HavC	1176704634	K.IDC(+57.02)EEDD(+43.99)NGKYYKR.V	Y	25.55	1847.76	14	0.9	616.929	3	50.59	3810000	1	10517	1	833	846	Carbamidomethylation; Carboxylation (DKW)	C3:Carbamidomethylation:1000.00;D7:Carboxylation (DKW):9.42	251.94	55	10100000000	260	255	929	73702	Hic74 [Hyriopsis cumingii]
HavC	1176704634	G.GFGGAAAS(sub A)AAAAAAAAEVVDEFGIGALAGV(sub A).G	Y	25.5	2561.28	30	7.3	1281.65	2	111.67	0	1	23824	1	79	108			251.94	55	10100000000	260	255	929	73702	Hic74 [Hyriopsis cumingii]
HavC	1176704634	A.AAAAEVVDEFGI(-.98).G	Y	25.48	1189.6	12	-0.4	595.806	2	89.43	124000	1	18904	1	91	102	Amidation	I12:Amidation:1000.00	251.94	55	10100000000	260	255	929	73702	Hic74 [Hyriopsis cumingii]
HavC	1176704634	A.SVLGDVDGLGGLSS(sub A)LGL.G	Y	25.44	1557.83	17	-5.4	779.915	2	112.04	0	2	23814	1	124	140			251.94	55	10100000000	260	255	929	73702	Hic74 [Hyriopsis cumingii]
HavC	1176704634	G.GFGGAAS(sub A)AAAAAAAAAEVVDEFGIGALAGV(sub A).G	Y	25.39	2561.28	30	3.9	854.769	3	111.63	0	1	23815	1	79	108			251.94	55	10100000000	260	255	929	73702	Hic74 [Hyriopsis cumingii]
HavC	1176704634	V.QEEIWKK(+43.01)I.D	Y	25.39	1115.6	8	-0.6	558.806	2	77.42	9440000	2	16108	1	826	833	Carbamylation	K7:Carbamylation:26.02	251.94	55	10100000000	260	255	929	73702	Hic74 [Hyriopsis cumingii]
HavC	1176704634	L.G(+71.04)LGGVGGGGLDLDTDTL.L	Y	25.34	1586.78	17	-2.6	794.395	2	101.79	0	2	21559	1	285	301	Propionamide (K X@N-term)	G1:Propionamide (K X@N-term):1000.00	251.94	55	10100000000	260	255	929	73702	Hic74 [Hyriopsis cumingii]
HavC	1176704634	R.NGQ(+.98)NPIAAAAAAAAAAASGSG.G	Y	25.28	1711.81	21	0.1	856.914	2	111.63	550000	2	23726	1	763	783	Deamidation (NQ)	Q3:Deamidation (NQ):0.00	251.94	55	10100000000	260	255	929	73702	Hic74 [Hyriopsis cumingii]
HavC	1176704634	D.KVQEEIW(+15.99)K.K	Y	25.28	1074.57	8	-1.2	538.292	2	38.97	0	1	7972	1	824	831	Oxidation (HW)	W7:Oxidation (HW):1000.00	251.94	55	10100000000	260	255	929	73702	Hic74 [Hyriopsis cumingii]
HavC	1176704634	K.VQEEIWK(+42.01)K.I	Y	25.27	1100.59	8	1	551.301	2	60.83	2680000	1	12719	2	825	832	Acetylation (K)	K7:Acetylation (K):11.06	251.94	55	10100000000	260	255	929	73702	Hic74 [Hyriopsis cumingii]
HavC	1176704634	E.GGGGFGGEGEGEGEYE.Y	Y	25.26	1486.55	16	-0.3	744.281	2	65.4	1090000	2	13500	1	173	188			251.94	55	10100000000	260	255	929	73702	Hic74 [Hyriopsis cumingii]
HavC	1176704634	G.LAS(+114.04)VLGDVDGLGGL.S	Y	25.23	1398.74	14	2.8	700.377	2	109.14	975000	2	23183	1	122	135	Ubiquitin	S3:Ubiquitin:1000.00	251.94	55	10100000000	260	255	929	73702	Hic74 [Hyriopsis cumingii]
HavC	1176704634	G.SGGSGGSGGSGGSGQR(+14.02)DKVQ(+.98)EEI.W	Y	25.16	2106.94	23	2.8	703.323	3	57.13	3290000	1	11924	1	807	829	Methylation(KR); Deamidation (NQ)	R16:Methylation(KR):0.00;Q20:Deamidation (NQ):0.00	251.94	55	10100000000	260	255	929	73702	Hic74 [Hyriopsis cumingii]
HavC	1176704634	C.EEDDN(+.98)GKYYK.R	Y	25.13	1260.51	10	-1	421.178	3	23.7	3250000	1	4624	1	836	845	Deamidation (NQ)	N5:Deamidation (NQ):1000.00	251.94	55	10100000000	260	255	929	73702	Hic74 [Hyriopsis cumingii]
HavC	1176704634	K.VQEEIWKK.I	Y	25.1	1058.58	8	-1.3	530.295	2	42.92	23100000	1	8842	4	825	832			251.94	55	10100000000	260	255	929	73702	Hic74 [Hyriopsis cumingii]
HavC	1176704634	G.SAAAAAAAAAAAGGGGFSGA(+17.03).G	Y	25.09	1493.72	20	1.3	747.869	2	63.39	0	1	13271	1	332	351	Replacement of proton with ammonium ion	A20:Replacement of proton with ammonium ion:1000.00	251.94	55	10100000000	260	255	929	73702	Hic74 [Hyriopsis cumingii]
HavC	1176704634	D.GLGGLS(+162.05)ALGLGGGL.A	Y	25.08	1302.7	14	-6.9	652.354	2	100.95	133000	1	21433	1	131	144	Hexose (NSY)	S6:Hexose (NSY):1000.00	251.94	55	10100000000	260	255	929	73702	Hic74 [Hyriopsis cumingii]
HavC	1176704634	L.GLGGL(sub V)GGGGLDLDTDTL.L	Y	25.07	1529.76	17	-0.3	765.886	2	100.17	0	1	21261	1	285	301			251.94	55	10100000000	260	255	929	73702	Hic74 [Hyriopsis cumingii]
HavC	1176704634	A.AEVVDEFGIGA.L	Y	25.06	1105.53	11	2	553.773	2	88.18	1170000	1	18636	2	94	104			251.94	55	10100000000	260	255	929	73702	Hic74 [Hyriopsis cumingii]
HavC	1176704634	S.GGSGQ(+.98)G(sub R)DKVQ(+.98)EEIWK.K	Y	25.06	1618.75	15	1.3	810.382	2	62.84	2670000	2	12954	1	817	831	Deamidation (NQ)	Q5:Deamidation (NQ):1000.00;Q10:Deamidation (NQ):1000.00	251.94	55	10100000000	260	255	929	73702	Hic74 [Hyriopsis cumingii]
HavC	1176704634	K.VQ(+.98)EEIWK.K	Y	25.03	931.465	7	-1.5	466.739	2	61.86	548000000	2	12747	3	825	831	Deamidation (NQ)	Q2:Deamidation (NQ):1000.00	251.94	55	10100000000	260	255	929	73702	Hic74 [Hyriopsis cumingii]
HavC	1176704634	G.AGAA(sub G)AGAGGAGALGLASVLG.D	Y	25	1510.81	20	0.2	756.413	2	98.65	4300000	2	20862	1	108	127			251.94	55	10100000000	260	255	929	73702	Hic74 [Hyriopsis cumingii]
HavC	1176704634	A.AAEVVDEFGI.G	Y	25	1048.51	10	0.2	525.261	2	91.02	174000	1	19250	1	93	102			251.94	55	10100000000	260	255	929	73702	Hic74 [Hyriopsis cumingii]
HavC	1176704634	K.VQ(+.98)EEIWKKI.D	Y	24.93	1172.64	9	-0.4	587.329	2	67.21	1850000	2	13886	1	825	833	Deamidation (NQ)	Q2:Deamidation (NQ):1000.00	251.94	55	10100000000	260	255	929	73702	Hic74 [Hyriopsis cumingii]
HavC	1176704634	S.GGGGGS(sub A)GGSGGSGGSGGSGGSGQ(+.98)RDK.V	Y	24.82	1980.81	26	-4.3	991.409	2	20.14	1700000	2	3813	1	799	824	Deamidation (NQ)	Q23:Deamidation (NQ):1000.00	251.94	55	10100000000	260	255	929	73702	Hic74 [Hyriopsis cumingii]
HavC	1176704634	Q.N(sub R)DKVQEEIWK.K	Y	24.79	1287.65	10	0.5	644.831	2	54.96	1170000	1	11460	1	822	831			251.94	55	10100000000	260	255	929	73702	Hic74 [Hyriopsis cumingii]
HavC	1176704634	K.KIDC(+57.02)EEDDN(+.98)GKYYKRVVKV	Y	24.78	2358.15	19	-1.7	590.544	4	55.19	873000	2	11329	1	832	850	Carbamidomethylation; Deamidation (NQ)	C4:Carbamidomethylation:1000.00;N9:Deamidation (NQ):1000.00	251.94	55	10100000000	260	255	929	73702	Hic74 [Hyriopsis cumingii]
HavC	1176704634	A.AAAAAAGGDGDALAASAAR(+15.99).R	Y	24.76	1572.75	19	-0.2	787.382	2	51.22	2390000	1	10653	1	727	745	Oxidation or Hydroxylation	R19:Oxidation or Hydroxylation:35.10	251.94	55	10100000000	260	255	929	73702	Hic74 [Hyriopsis cumingii]
HavC	1176704634	K.KIDC(+57.02)EEDD.N	Y	24.73	1022.39	8	0.6	512.201	2	22.11	55300000	2	4231	2	832	839	Carbamidomethylation	C4:Carbamidomethylation:1000.00	251.94	55	10100000000	260	255	929	73702	Hic74 [Hyriopsis cumingii]
HavC	1176704634	G.S(sub A)ALGLGGL(sub V)GGGGLDLDTDTL.L	Y	24.72	1800.91	20	0.3	901.463	2	105.92	643000	1	22542	1	282	301			251.94	55	10100000000	260	255	929	73702	Hic74 [Hyriopsis cumingii]
HavC	1176704634	G.GSGGSGGSGQRDK.V	Y	24.71	1148.52	13	-8.6	575.261	2	16.96	9540000	2	3134	1	812	824			251.94	55	10100000000	260	255	929	73702	Hic74 [Hyriopsis cumingii]
HavC	1176704634	G.LGGL(sub V)GGGGLDLDTDTL.L	Y	24.7	1472.74	16	0	737.375	2	97.49	447000	1	20670	1	286	301			251.94	55	10100000000	260	255	929	73702	Hic74 [Hyriopsis cumingii]
HavC	1176704634	V.LGDVDGLGGLSALGL.G	Y	24.69	1355.73	15	-1.2	678.871	2	112	2610000	2	23805	1	126	140			251.94	55	10100000000	260	255	929	73702	Hic74 [Hyriopsis cumingii]
HavC	1176704634	I.DC(+57.02)EEDDNGK(+58.01)YYKRVV.K	Y	24.69	1946.83	15	-2.2	649.95	3	55.51	29100000	2	11395	1	834	848	Carbamidomethylation; Carboxymethyl (KW X@N-term)	C2:Carbamidomethylation:1000.00;K9:Carboxymethyl (KW X@N-term):38.16	251.94	55	10100000000	260	255	929	73702	Hic74 [Hyriopsis cumingii]
HavC	1176704634	G.L(+71.04)GGVGGGGLDLDTDTLLA.L	Y	24.62	1713.88	18	2.5	857.949	2	106.68	166000	1	22712	1	286	303	Propionamide (K X@N-term)	L1:Propionamide (K X@N-term):1000.00	251.94	55	10100000000	260	255	929	73702	Hic74 [Hyriopsis cumingii]
HavC	1176704634	G.SGGSGGSGGSGGSGQ(+.98)G(sub R)DKVQEEIWK.K	Y	24.62	2308.02	25	1.2	770.348	3	56.94	2450000	1	11881	1	807	831	Deamidation (NQ)	Q15:Deamidation (NQ):46.62	251.94	55	10100000000	260	255	929	73702	Hic74 [Hyriopsis cumingii]
HavC	1176704634	E.EDDN(+.98)GKYYK.R	Y	24.46	1131.47	9	-0.2	566.743	2	21.77	1810000	1	4204	1	837	845	Deamidation (NQ)	N4:Deamidation (NQ):1000.00	251.94	55	10100000000	260	255	929	73702	Hic74 [Hyriopsis cumingii]
HavC	1176704634	R.VPILGASAAASAAASAGGF.G	Y	24.44	1587.83	19	1.4	794.921	2	93.28	87700	1	19744	1	62	80			251.94	55	10100000000	260	255	929	73702	Hic74 [Hyriopsis cumingii]
HavC	1176704634	I.DC(+57.02)EEDDNGK(+58.01)YYKRV.V	Y	24.37	1847.76	14	0.4	924.889	2	47.88	0	2	9772	1	834	847	Carbamidomethylation; Carboxymethyl (KW X@N-term)	C2:Carbamidomethylation:1000.00;K9:Carboxymethyl (KW X@N-term):32.69	251.94	55	10100000000	260	255	929	73702	Hic74 [Hyriopsis cumingii]
HavC	1176704634	A.EVVDEFGIGA.L	Y	24.35	1034.49	10	1.6	518.254	2	87.5	10900000	1	18487	1	95	104			251.94	55	10100000000	260	255	929	73702	Hic74 [Hyriopsis cumingii]
HavC	1176704634	G.SGQ(+.98)G(sub R)DKVQEEIWK.K	Y	24.31	1503.72	13	0	752.867	2	58.6	10200000	1	12240	2	819	831	Deamidation (NQ)	Q3:Deamidation (NQ):127.18	251.94	55	10100000000	260	255	929	73702	Hic74 [Hyriopsis cumingii]
HavC	1176704634	A.LGLASVLGDVDGL.G	Y	24.28	1227.67	13	-0.5	614.842	2	110.41	3550000	2	23462	1	120	132			251.94	55	10100000000	260	255	929	73702	Hic74 [Hyriopsis cumingii]
HavC	1176704634	G.GSGGSGGSGGSGGSGQR(+14.02)DKVQ(+.98)EEI.W	Y	24.28	2163.96	24	0.1	722.328	3	56.98	2440000	1	11892	1	806	829	Methylation(KR); Deamidation (NQ)	R17:Methylation(KR):0.00;Q21:Deamidation (NQ):0.00	251.94	55	10100000000	260	255	929	73702	Hic74 [Hyriopsis cumingii]
HavC	1176704634	S.DC(+57.02)DC(+57.02)TLRVPI.L	Y	24.26	1247.56	10	1.4	624.79	2	81.06	0	2	16921	1	55	64	Carbamidomethylation	C2:Carbamidomethylation:1000.00;C4:Carbamidomethylation:1000.00	251.94	55	10100000000	260	255	929	73702	Hic74 [Hyriopsis cumingii]
HavC	1176704634	R.DKVQEEIW(+15.99)K.K	Y	24.22	1189.6	9	-2.3	595.805	2	54.32	2840000	1	11325	1	823	831	Oxidation (HW)	W8:Oxidation (HW):1000.00	251.94	55	10100000000	260	255	929	73702	Hic74 [Hyriopsis cumingii]
HavC	1176704634	G.GSGGSGGSGGS(+126.10)GGSG.Q	N	24.2	1149.49	15	0.9	575.753	2	17.27	3440000	1	3222	1	806	820	Octanoyl	S11:Octanoyl:0.00	251.94	55	10100000000	260	255	929	73702	Hic74 [Hyriopsis cumingii]
HavC	1176704634	R.VPILGASAAASAAASAGGFG(+17.03).G	Y	24.19	1661.87	20	3.4	831.947	2	91.46	83900	1	19348	1	62	81	Replacement of proton with ammonium ion	G20:Replacement of proton with ammonium ion:1000.00	251.94	55	10100000000	260	255	929	73702	Hic74 [Hyriopsis cumingii]
HavC	1176704634	A.SVLGDVD(+17.03)GLGGLSAL.G	Y	24.13	1388.75	15	-0.8	695.382	2	105.82	164000	1	22519	1	124	138	Replacement of proton with ammonium ion	D7:Replacement of proton with ammonium ion:0.00	251.94	55	10100000000	260	255	929	73702	Hic74 [Hyriopsis cumingii]
HavC	1176704634	G.GSGGSGGS(+126.10)GGSGGSG.Q	N	24.09	1149.49	15	0.2	575.752	2	18.26	13200000	2	3413	1	806	820	Octanoyl	S8:Octanoyl:11.67	251.94	55	10100000000	260	255	929	73702	Hic74 [Hyriopsis cumingii]
HavC	1176704634	R.VPILGASAAASA.A	Y	24.06	1026.57	12	3.4	514.294	2	75.42	1040000	1	15865	1	62	73			251.94	55	10100000000	260	255	929	73702	Hic74 [Hyriopsis cumingii]
HavC	1176704634	R.AAAAAAAAAAAAAI.R	Y	24.05	1054.58	14	-0.1	528.296	2	79.55	0	1	16756	1	748	761			251.94	55	10100000000	260	255	929	73702	Hic74 [Hyriopsis cumingii]
HavC	1176704634	R.AAASAAAAAAAVS.S	Y	24.01	1001.51	13	0.3	501.764	2	60.96	5190000	2	12555	1	528	540			251.94	55	10100000000	260	255	929	73702	Hic74 [Hyriopsis cumingii]
HavC	1176704634	S.GGSGQ(+.98)G(sub R)DKVQEEI.W	Y	23.97	1303.59	13	-0.2	652.802	2	53.06	17400000	2	10874	1	817	829	Deamidation (NQ)	Q5:Deamidation (NQ):58.00	251.94	55	10100000000	260	255	929	73702	Hic74 [Hyriopsis cumingii]
HavC	1176704634	A.AAAAAAAAASR.R	N	23.95	900.478	11	2.9	451.247	2	22.8	6930000	2	4377	1	707	717			251.94	55	10100000000	260	255	929	73702	Hic74 [Hyriopsis cumingii]
HavC	1176704634	G.LASVLGDVDGLGGL.S	Y	23.9	1284.69	14	1.4	643.354	2	102.82	244000	1	21850	1	122	135			251.94	55	10100000000	260	255	929	73702	Hic74 [Hyriopsis cumingii]
HavC	1176704634	A.AAGGGGFS(-15.99)GAGAGAGARA.N	Y	23.8	1345.65	18	-0.2	673.832	2	47.24	6780000	1	9789	1	342	359	Deoxy	S8:Deoxy:1000.00	251.94	55	10100000000	260	255	929	73702	Hic74 [Hyriopsis cumingii]
HavC	1176704634	G.GLDLDTDTL.L	Y	23.79	961.46	9	2.2	962.47	1	87.07	0	1	18392	1	293	301			251.94	55	10100000000	260	255	929	73702	Hic74 [Hyriopsis cumingii]
HavC	1176704634	I.DC(+57.02)EEDDN(+.98)GKYG(sub Y)KRVV.K	Y	23.74	1783.77	15	0.9	892.892	2	41.36	649000	2	8353	1	834	848	Carbamidomethylation; Deamidation (NQ)	C2:Carbamidomethylation:1000.00;N7:Deamidation (NQ):1000.00	251.94	55	10100000000	260	255	929	73702	Hic74 [Hyriopsis cumingii]
HavC	1176704634	K.IDC(+57.02)E(+37.95)EDDNGK.Y	Y	23.63	1231.4	10	0.7	616.707	2	20.29	9190000	2	3845	1	833	842	Carbamidomethylation; Replacement of 2 protons by calcium	C3:Carbamidomethylation:1000.00;E4:Replacement of 2 protons by calcium:0.00	251.94	55	10100000000	260	255	929	73702	Hic74 [Hyriopsis cumingii]
HavC	1176704634	V.QEEIWKKI.D	Y	23.63	1072.59	8	0.2	537.303	2	61.1	625000000	2	12586	4	826	833			251.94	55	10100000000	260	255	929	73702	Hic74 [Hyriopsis cumingii]
HavC	1176704634	G.A(+43.01)DGAGGLSVGGL.A	Y	23.62	1015.49	12	-1	508.753	2	84.1	2660000	2	17605	1	150	161	Carbamylation	A1:Carbamylation:1000.00	251.94	55	10100000000	260	255	929	73702	Hic74 [Hyriopsis cumingii]
HavC	1176704634	G.SGGSGQ(+.98)G(sub R)DKVQ(+.98)EEI.W	Y	23.6	1391.61	14	-1.7	696.809	2	56.32	41400000	2	11567	2	816	829	Deamidation (NQ)	Q6:Deamidation (NQ):1000.00;Q11:Deamidation (NQ):1000.00	251.94	55	10100000000	260	255	929	73702	Hic74 [Hyriopsis cumingii]
HavC	1176704634	S.VLGDVDGLGGLS.A	Y	23.56	1100.57	12	4.3	551.295	2	91.03	4890000	2	19163	1	125	136			251.94	55	10100000000	260	255	929	73702	Hic74 [Hyriopsis cumingii]
HavC	1176704634	G.AGFGGGAGAGAGAGAGV.G	Y	23.55	1203.56	17	0.2	602.789	2	65.79	790000	1	13792	1	220	236			251.94	55	10100000000	260	255	929	73702	Hic74 [Hyriopsis cumingii]
HavC	1176704634	A.D(sub A)P(sub A)AAAAAAEVVDEFGIGALAGV(sub A).G	Y	23.54	2013.01	22	7.9	1007.52	2	112.05	288000	1	23903	1	87	108			251.94	55	10100000000	260	255	929	73702	Hic74 [Hyriopsis cumingii]
HavC	1176704634	A.GGSGGSGGSGGSGGSGQ(+.98)R(+14.02)DKVQEEI.W	Y	23.53	2220.98	25	1.6	741.337	3	57.08	1050000	1	11914	1	805	829	Deamidation (NQ); Methylation(KR)	Q17:Deamidation (NQ):1.86;R18:Methylation(KR):0.00	251.94	55	10100000000	260	255	929	73702	Hic74 [Hyriopsis cumingii]
HavC	1176704634	G.DGGAGFGGGAGA.G	Y	23.53	892.367	12	-1.8	447.19	2	59.6	3200000	2	12266	1	217	228			251.94	55	10100000000	260	255	929	73702	Hic74 [Hyriopsis cumingii]
HavC	1176704634	L.GLASVLGDVDGLG.G	Y	23.53	1171.61	13	1.4	586.812	2	99.73	5210000	2	21101	1	121	133			251.94	55	10100000000	260	255	929	73702	Hic74 [Hyriopsis cumingii]
HavC	1176704634	A.DGAGGLSVGGL.A	Y	23.52	901.451	11	0.4	451.733	2	94.96	1160000	2	20039	1	151	161			251.94	55	10100000000	260	255	929	73702	Hic74 [Hyriopsis cumingii]
HavC	1176704634	L.GLASVLGDVDGL.G	Y	23.51	1114.59	12	3	558.302	2	101.94	11300000	2	21591	1	121	132			251.94	55	10100000000	260	255	929	73702	Hic74 [Hyriopsis cumingii]
HavC	1176704634	K.IDC(+57.02)EEDDN(-17.03)GK.Y	Y	23.39	1176.42	10	-0.2	589.219	2	23.31	24400000	2	4485	2	833	842	Carbamidomethylation; Ammonia-loss (N)	C3:Carbamidomethylation:1000.00;N8:Ammonia-loss (N):1000.00	251.94	55	10100000000	260	255	929	73702	Hic74 [Hyriopsis cumingii]
HavC	1176704634	A.GFGGGAGAGAGAGA.G	Y	23.36	976.436	14	-1.7	489.224	2	54.33	2790000	2	11146	1	221	234			251.94	55	10100000000	260	255	929	73702	Hic74 [Hyriopsis cumingii]
HavC	1176704634	G.SD(sub E)GGDGGAGFGGGAGA.G	Y	23.35	1208.47	16	-0.5	605.242	2	58.44	8310000	2	12015	1	213	228			251.94	55	10100000000	260	255	929	73702	Hic74 [Hyriopsis cumingii]
HavC	1176704634	G.GSGGSGQ(+.98)G(sub R)DKVQEEI.W	Y	23.35	1447.64	15	-0.6	724.828	2	53.21	11800000	2	10906	1	815	829	Deamidation (NQ)	Q7:Deamidation (NQ):76.42	251.94	55	10100000000	260	255	929	73702	Hic74 [Hyriopsis cumingii]
HavC	1176704634	G.SGQG(sub R)DKVQEEI.W	Y	23.33	1188.56	11	-0.1	595.288	2	47.92	17900000	1	9933	1	819	829			251.94	55	10100000000	260	255	929	73702	Hic74 [Hyriopsis cumingii]
HavC	1176704634	D.N(+.98)GKYYKRVVKV	Y	23.32	1353.78	11	-0.1	452.266	3	48.13	2080000	2	9826	1	840	850	Deamidation (NQ)	N1:Deamidation (NQ):1000.00	251.94	55	10100000000	260	255	929	73702	Hic74 [Hyriopsis cumingii]
HavC	1176704634	Q.EEIWKKI.D	Y	23.26	944.533	7	-1.9	473.273	2	61.24	59700000	2	12616	2	827	833			251.94	55	10100000000	260	255	929	73702	Hic74 [Hyriopsis cumingii]
HavC	1176704634	A.AAAAAAAAAAAIR(+28.03)N.G	Y	23.22	1210.68	14	0.5	606.347	2	74.83	518000	2	15541	1	750	763	Dimethylation(KR)	R13:Dimethylation(KR):1000.00	251.94	55	10100000000	260	255	929	73702	Hic74 [Hyriopsis cumingii]
HavC	1176704634	K.KHAAAAAAAAAAAG.G	Y	23.21	1121.59	14	-1.3	561.804	2	24.7	567000	1	4843	1	496	509			251.94	55	10100000000	260	255	929	73702	Hic74 [Hyriopsis cumingii]
HavC	1176704634	A.GR(sub A)GAGAGGAGALGLASVL.G	Y	23	1453.8	18	-4.9	727.904	2	96.23	211000	1	20394	1	109	126			251.94	55	10100000000	260	255	929	73702	Hic74 [Hyriopsis cumingii]
HavC	1176704634	A.SVLGDVDGLG.G	Y	22.97	930.466	10	0.6	466.24	2	86.8	90800000	2	18214	1	124	133			251.94	55	10100000000	260	255	929	73702	Hic74 [Hyriopsis cumingii]
HavC	1176704634	G.KYYKRVV.K	Y	22.96	954.565	7	-0.3	478.29	2	27.37	38600000	2	5346	2	842	848			251.94	55	10100000000	260	255	929	73702	Hic74 [Hyriopsis cumingii]
HavC	1176704634	G.SGGSGGSGGSGGSGQRDK(+14.02)VQ(+.98)EEI.W	Y	22.95	2106.94	23	2.1	703.323	3	58.09	2180000	1	12133	1	807	829	Methylation(KR); Deamidation (NQ)	K18:Methylation(KR):0.00;Q20:Deamidation (NQ):0.00	251.94	55	10100000000	260	255	929	73702	Hic74 [Hyriopsis cumingii]
HavC	1176704634	G.GGFGGEGEGEGEYE.Y	Y	22.95	1372.51	14	0.2	687.26	2	65.38	775000	2	13494	1	175	188			251.94	55	10100000000	260	255	929	73702	Hic74 [Hyriopsis cumingii]
HavC	1176704634	G.SGGSGGSGGS(+126.10)GGSG.Q	N	22.91	1092.47	14	0.2	547.241	2	17.52	5890000	1	3278	1	807	820	Octanoyl	S10:Octanoyl:16.66	251.94	55	10100000000	260	255	929	73702	Hic74 [Hyriopsis cumingii]
HavC	1176704634	K.KIDC(+57.02)EED.D	Y	22.83	907.359	7	-0.6	454.687	2	20.88	45000000	2	3971	1	832	838	Carbamidomethylation	C4:Carbamidomethylation:1000.00	251.94	55	10100000000	260	255	929	73702	Hic74 [Hyriopsis cumingii]
HavC	1176704634	G.A(+43.01)GGADGAGGL.S	Y	22.75	787.346	10	1	394.681	2	45.48	4230000	2	9253	1	147	156	Carbamylation	A1:Carbamylation:1000.00	251.94	55	10100000000	260	255	929	73702	Hic74 [Hyriopsis cumingii]
HavC	372558280	S.A(+43.01)GAGAAGGAGGAGGAGGA.G	N	35.77	1199.53	18	-0.4	600.771	2	25.01	20700000	1	4908	3	620	637	Carbamylation	A1:Carbamylation:1000.00	141.15	25	52500000	33	18	50	85100	insoluble matrix protein [Pinctada fucata]
HavC	372558280	A.A(+43.01)AAGGAGGAGGAGGA.G	N	34.58	1014.45	15	1.1	508.232	2	21.87	117000000	1	4225	3	564	578	Carbamylation	A1:Carbamylation:1000.00	141.15	25	52500000	33	18	50	85100	insoluble matrix protein [Pinctada fucata]
HavC	372558280	S.A(+43.01)GAGAAGGAGGAGGAGGAGGSASAAA.A	Y	33.04	1771.78	26	5.6	886.904	2	37.65	539000	1	7681	1	620	645	Carbamylation	A1:Carbamylation:1000.00	141.15	25	52500000	33	18	50	85100	insoluble matrix protein [Pinctada fucata]
HavC	372558280	A.A(+43.01)AAAGGAGGAGGAGGA.G	N	32.57	1085.48	16	0.3	543.75	2	24.3	16900000	2	4695	2	563	578	Carbamylation	A1:Carbamylation:1000.00	141.15	25	52500000	33	18	50	85100	insoluble matrix protein [Pinctada fucata]
HavC	372558280	A.A(+43.01)AGGAGGAGGAGGA.G	N	31.69	943.411	14	-0.1	472.713	2	21.09	2580000	2	4014	2	565	578	Carbamylation	A1:Carbamylation:1000.00	141.15	25	52500000	33	18	50	85100	insoluble matrix protein [Pinctada fucata]
HavC	372558280	I.GGAGGAGGAGGGVGGAGGAGGAAGGADG(-.98).S	Y	31.58	1825.81	28	-0.6	913.909	2	39.65	1270000	1	8121	3	185	212	Amidation	G28:Amidation:1000.00	141.15	25	52500000	33	18	50	85100	insoluble matrix protein [Pinctada fucata]
HavC	372558280	A.AGGAGGAGGAGGAGGS(-15.99)AAG.G	N	31.36	1213.54	19	0.7	607.779	2	26.68	45300000	1	5270	4	566	584	Deoxy	S16:Deoxy:1000.00	141.15	25	52500000	33	18	50	85100	insoluble matrix protein [Pinctada fucata]
HavC	372558280	G.A(+43.01)GAAGGAGGAGGAGGA.G	N	30.98	1071.47	16	0.3	536.742	2	22.78	9120000	2	4373	1	622	637	Carbamylation	A1:Carbamylation:1000.00	141.15	25	52500000	33	18	50	85100	insoluble matrix protein [Pinctada fucata]
HavC	372558280	A.GAAGGAGGAGGAGGAGG(+14.02).S	Y	30.77	1085.48	17	0.4	543.75	2	23.52	6890000	1	4584	1	623	639	Methylation(C-term)	G17:Methylation(C-term):1000.00	141.15	25	52500000	33	18	50	85100	insoluble matrix protein [Pinctada fucata]
HavC	372558280	A.GAGAAGGAGGAGGAGGAGG(+14.02).S	Y	30.58	1213.54	19	0.2	607.779	2	25.66	2530000	1	5045	1	621	639	Methylation(C-term)	G19:Methylation(C-term):1000.00	141.15	25	52500000	33	18	50	85100	insoluble matrix protein [Pinctada fucata]
HavC	372558280	A.AGGAGGAGGAGGAGG(+14.02).S	N	30.52	957.426	15	0.4	479.721	2	21.54	8530000	2	4110	1	566	580	Methylation(C-term)	G15:Methylation(C-term):1000.00	141.15	25	52500000	33	18	50	85100	insoluble matrix protein [Pinctada fucata]
HavC	372558280	A.A(+43.01)AAGGAGGAGGAGGAG.G	N	29.19	1071.47	16	0.9	536.742	2	19.94	13100000	1	3806	3	564	579	Carbamylation	A1:Carbamylation:1000.00	141.15	25	52500000	33	18	50	85100	insoluble matrix protein [Pinctada fucata]
HavC	372558280	S.ARAAAAAAAAAAAGGAGGMGGL(-.98).G	Y	28.74	1682.86	22	-1.9	561.961	3	90.78	2640000	2	19107	1	528	549	Amidation	L22:Amidation:1000.00	141.15	25	52500000	33	18	50	85100	insoluble matrix protein [Pinctada fucata]
HavC	372558280	S.A(+43.01)GAGAAGGAGGAGGAGGAG.G	Y	28.18	1256.55	19	1.7	629.283	2	26.54	1110000	2	5171	2	620	638	Carbamylation	A1:Carbamylation:1000.00	141.15	25	52500000	33	18	50	85100	insoluble matrix protein [Pinctada fucata]
HavC	372558280	G.A(+43.01)GAAGGAGGAGGAGGAGGSASAAA.A	Y	27.1	1643.72	24	9.2	822.877	2	33.78	3260000	1	6826	2	622	645	Carbamylation	A1:Carbamylation:1000.00	141.15	25	52500000	33	18	50	85100	insoluble matrix protein [Pinctada fucata]
HavC	372558280	Y.C(+42.01)TVIISVGAGASAAAAAAAAAAGAAGA.G	N	26.92	2156.09	27	8.8	1079.06	2	90.62	515000	1	19163	2	59	85	Acetylation (N-term)	C1:Acetylation (N-term):1000.00	141.15	25	52500000	33	18	50	85100	insoluble matrix protein [Pinctada fucata]
HavC	372558280	A.A(+43.01)AAGAAGAGAGAG.A	N	25.83	914.42	13	0.1	458.218	2	23.4	5830000	2	4505	1	78	90	Carbamylation	A1:Carbamylation:1000.00	141.15	25	52500000	33	18	50	85100	insoluble matrix protein [Pinctada fucata]
HavC	372558280	A.GAGAAGGAGGAGGAGGAGGSASAAA.A	Y	25.25	1657.74	25	5.7	829.882	2	40.65	1450000	2	8201	1	621	645			141.15	25	52500000	33	18	50	85100	insoluble matrix protein [Pinctada fucata]
HavC	372558280	A.AGGAGGAGGAGGAGGS(+162.05)AAGGA.A	Y	25.13	1519.65	21	8	760.838	2	31.54	2610000	1	6334	1	566	586	Hexose (NSY)	S16:Hexose (NSY):1000.00	141.15	25	52500000	33	18	50	85100	insoluble matrix protein [Pinctada fucata]
HavC	372558280	T.RLGGGGGSS(+75.98)AAAAAAAAAASAGGSDGA.G	N	24.91	2134.95	27	5.9	712.661	3	101.41	2270000	2	21474	1	847	873	EDT	S9:EDT:0.00	141.15	25	52500000	33	18	50	85100	insoluble matrix protein [Pinctada fucata]
HavC	372558280	S.A(+43.01)GAGAAGGAGGAGGAGGAGGSASAAAA.A	Y	24.89	1842.82	27	5.6	922.423	2	39.43	377000	1	8074	2	620	646	Carbamylation	A1:Carbamylation:1000.00	141.15	25	52500000	33	18	50	85100	insoluble matrix protein [Pinctada fucata]
HavC	372558280	G.A(+43.01)GGVGGGAGAGGAGGAG.G	N	24.79	1142.51	17	4.3	572.263	2	27.39	0	2	5351	1	163	179	Carbamylation	A1:Carbamylation:1000.00	141.15	25	52500000	33	18	50	85100	insoluble matrix protein [Pinctada fucata]
HavC	372558280	A.GAAGGAGGAGGAGGAG.G	Y	24.44	1014.45	16	3.4	508.233	2	21.5	0	2	4102	1	623	638			141.15	25	52500000	33	18	50	85100	insoluble matrix protein [Pinctada fucata]
HavC	372558280	G.GAGAGAGAGAGAGV(-.98).G	Y	24.07	941.468	14	-0.6	471.741	2	35.56	1640000	2	7091	1	468	481	Amidation	V14:Amidation:1000.00	141.15	25	52500000	33	18	50	85100	insoluble matrix protein [Pinctada fucata]
HavC	372558280	G.G(+43.01)AGGAGGVGGGAGAGGAGG.A	N	23.76	1256.55	19	1.8	629.283	2	27.1	3180000	2	5288	1	159	177	Carbamylation	G1:Carbamylation:1000.00	141.15	25	52500000	33	18	50	85100	insoluble matrix protein [Pinctada fucata]
HavC	372558280	L.L(+27.99)GGEGGAGGAGGAGGAGGAG.S	Y	23.69	1384.6	20	3.9	693.308	2	31.4	1440000	2	6203	1	254	273	Formylation	L1:Formylation:1000.00	141.15	25	52500000	33	18	50	85100	insoluble matrix protein [Pinctada fucata]
HavC	372558280	G.GAGGAGGAGGAGGA.G	Y	23.62	886.389	14	-0.2	444.202	2	20.43	14300000	2	3875	1	259	272			141.15	25	52500000	33	18	50	85100	insoluble matrix protein [Pinctada fucata]
HavC	372558280	V.G(+149.03)GIGGAGGAGGVGGGAGAGGAGGAG.G	N	23.58	1774.78	25	-1.7	888.396	2	22.66	9150000	2	4347	1	155	179	Benzyl isothiocyanate	G1:Benzyl isothiocyanate:1000.00	141.15	25	52500000	33	18	50	85100	insoluble matrix protein [Pinctada fucata]
HavC	372558280	R.AAAAAAAAAGAGR(+14.02).R	Y	23.47	1012.54	13	2.3	507.279	2	38.27	845000	1	7818	1	696	708	Methylation(KR)	R13:Methylation(KR):1000.00	141.15	25	52500000	33	18	50	85100	insoluble matrix protein [Pinctada fucata]
HavC	372558280	G.A(+27.99)GSGGGAGGVGGIGGA.G	N	23.35	1128.52	16	-0.3	565.265	2	63.94	1980000	2	13190	1	145	160	Formylation	A1:Formylation:1000.00	141.15	25	52500000	33	18	50	85100	insoluble matrix protein [Pinctada fucata]
HavC	372558280	A.GAAGGAGGAGGAGGAGGS(+14.02)ASAAA.A	Y	23.23	1543.7	23	7.4	772.862	2	40.37	778000	2	8139	1	623	645	Methylation(others)	S18:Methylation(others):14.63	141.15	25	52500000	33	18	50	85100	insoluble matrix protein [Pinctada fucata]
HavC	372558280	G.G(+362.14)VGGAGGAGGAAGGA.D	Y	22.99	1347.59	15	5.7	674.808	2	18.3	10000000	2	3423	1	196	210	Nucleophilic addtion to cytopiloyne	G1:Nucleophilic addtion to cytopiloyne:1000.00	141.15	25	52500000	33	18	50	85100	insoluble matrix protein [Pinctada fucata]
HavC	372558280	A.GAGAAGGAGGAGGAGGAGGSASA(+28.03).A	Y	22.74	1543.7	23	7.7	772.862	2	41.13	772000	2	8304	1	621	643	Ethylation	A23:Ethylation:84.83	141.15	25	52500000	33	18	50	85100	insoluble matrix protein [Pinctada fucata]
HavC	365189155	A.A(+43.01)AAGGGAGGGAGAGAGAGAGAGGAGG.S	Y	35.54	1697.75	26	-0.4	849.88	2	35.35	3480000	1	7174	2	491	516	Carbamylation	A1:Carbamylation:1000.00	133.37	27	95700000	27	25	34	56611	MSI60-related protein [Pinctada fucata]
HavC	365189155	A.A(+43.01)AAGGGAGGGAGAGAGAGAGAGGAG.G	Y	34.52	1640.73	25	2.2	821.372	2	37.27	2510000	1	7596	3	491	515	Carbamylation	A1:Carbamylation:1000.00	133.37	27	95700000	27	25	34	56611	MSI60-related protein [Pinctada fucata]
HavC	365189155	A.A(+43.01)AAGGGAGGGAGAGAGAGAGAGG.A	Y	29.77	1512.67	23	-0.3	757.34	2	34.27	1720000	1	6935	3	491	513	Carbamylation	A1:Carbamylation:1000.00	133.37	27	95700000	27	25	34	56611	MSI60-related protein [Pinctada fucata]
HavC	365189155	G.A(+43.01)AAGAGAGGAGAGA.A	Y	29.58	971.442	14	0	486.728	2	27.32	3430000	2	5334	1	123	136	Carbamylation	A1:Carbamylation:1000.00	133.37	27	95700000	27	25	34	56611	MSI60-related protein [Pinctada fucata]
HavC	365189155	A.A(+43.01)AAAGGGAGGGAGAGAG.A	Y	28.09	1142.51	17	3.5	572.263	2	26.53	15400000	2	5168	1	490	506	Carbamylation	A1:Carbamylation:1000.00	133.37	27	95700000	27	25	34	56611	MSI60-related protein [Pinctada fucata]
HavC	365189155	G.GAGAGAGAGAGAGGA.G	Y	28.05	971.442	15	0	486.728	2	25.21	16600000	2	4890	1	500	514			133.37	27	95700000	27	25	34	56611	MSI60-related protein [Pinctada fucata]
HavC	365189155	A.AGGGAGGGAGAGAGAGAGAGGAGGS(+162.05).A	Y	27.79	1761.75	25	3.8	881.886	2	38.23	570000	2	7674	1	493	517	Hexose (NSY)	S25:Hexose (NSY):1000.00	133.37	27	95700000	27	25	34	56611	MSI60-related protein [Pinctada fucata]
HavC	365189155	G.SAAAAAAAAAAAAAANRRRVM(+15.99)ML.R	Y	27.74	2172.14	23	-7.6	1087.07	2	111.66	0	2	23733	1	341	363	Oxidation (M)	M21:Oxidation (M):8.69	133.37	27	95700000	27	25	34	56611	MSI60-related protein [Pinctada fucata]
HavC	365189155	A.A(+43.01)AAGGGAGGGAGAGAGAGAGAGGA.G	Y	27.04	1583.7	24	2.3	792.861	2	41.58	378000	2	8401	1	491	514	Carbamylation	A1:Carbamylation:1000.00	133.37	27	95700000	27	25	34	56611	MSI60-related protein [Pinctada fucata]
HavC	365189155	A.S(+154.14)AAAAAAAAAAASGGNAAA.A	Y	27.02	1568.82	19	1.4	785.416	2	88.56	10400000	2	18606	1	550	568	Decanoyl	S1:Decanoyl:255.02	133.37	27	95700000	27	25	34	56611	MSI60-related protein [Pinctada fucata]
HavC	365189155	G.AAAAAAAAAAAAAGGGM(+15.99)A.G	Y	27	1330.63	18	-3.5	666.32	2	52	5450000	1	10824	2	295	312	Oxidation (M)	M17:Oxidation (M):1000.00	133.37	27	95700000	27	25	34	56611	MSI60-related protein [Pinctada fucata]
HavC	365189155	G.GGAGGGAGAGAGAGAGAGGAGG.S	Y	26.87	1384.61	22	1.7	693.312	2	25.7	939000	1	5055	1	495	516			133.37	27	95700000	27	25	34	56611	MSI60-related protein [Pinctada fucata]
HavC	365189155	A.A(+43.01)AAAGGGAGGGAGAGA.G	Y	26.72	1085.48	16	1.6	543.751	2	22.95	0	1	4458	1	490	505	Carbamylation	A1:Carbamylation:1000.00	133.37	27	95700000	27	25	34	56611	MSI60-related protein [Pinctada fucata]
HavC	365189155	A.AGGGAGGGAGAGAGAGAGAGGAGG.S	Y	26.46	1512.67	24	-0.3	757.34	2	33.3	0	2	6611	1	493	516			133.37	27	95700000	27	25	34	56611	MSI60-related protein [Pinctada fucata]
HavC	365189155	A.A(+43.01)AAGGGAGGGAGA.G	Y	26.44	886.389	13	-0.4	444.202	2	19.53	10200000	2	3685	1	491	503	Carbamylation	A1:Carbamylation:1000.00	133.37	27	95700000	27	25	34	56611	MSI60-related protein [Pinctada fucata]
HavC	365189155	R.SAAAAAAAAAAAA.A	N	26.22	957.488	13	0.3	479.751	2	61.55	4840000	2	12681	1	57	69			133.37	27	95700000	27	25	34	56611	MSI60-related protein [Pinctada fucata]
HavC	365189155	A.GGGAGAGAGAGAGAGGAGG(+17.03).S	Y	25.8	1216.55	19	-0.2	609.284	2	27.39	8270000	2	5349	1	498	516	Replacement of proton with ammonium ion	G19:Replacement of proton with ammonium ion:1000.00	133.37	27	95700000	27	25	34	56611	MSI60-related protein [Pinctada fucata]
HavC	365189155	A.A(+87.03)AAAAAAAAAAGGRG.G	Y	25.38	1213.62	15	1.7	607.817	2	53.1	5440000	1	11064	1	372	386	Glycidamide adduct	A1:Glycidamide adduct:1000.00	133.37	27	95700000	27	25	34	56611	MSI60-related protein [Pinctada fucata]
HavC	365189155	A.AGGGAGGGAGAGAGAGAGAGGAGGSAAAA(+21.98).A	Y	24.86	1905.83	29	-4	953.918	2	39.58	355000	2	7966	1	493	521	Sodium adduct	A29:Sodium adduct:1000.00	133.37	27	95700000	27	25	34	56611	MSI60-related protein [Pinctada fucata]
HavC	365189155	L.R(+14.02)GRS(+79.97)AAAAAAAAAAAAAAGGGA.G	Y	24.49	1804.87	22	2.5	903.444	2	88.73	177000	1	18753	1	54	75	Methylation(KR); Phosphorylation (STY)	R1:Methylation(KR):0.00;S4:Phosphorylation (STY):1000.00	133.37	27	95700000	27	25	34	56611	MSI60-related protein [Pinctada fucata]
HavC	365189155	A.AGGGAGGGAGAGAGAGAGAGGAGG(+17.03).S	Y	24.11	1529.69	24	1.7	765.855	2	37.89	2020000	2	7601	1	493	516	Replacement of proton with ammonium ion	G24:Replacement of proton with ammonium ion:1000.00	133.37	27	95700000	27	25	34	56611	MSI60-related protein [Pinctada fucata]
HavC	365189155	A.AAAAAAAAASR.F	N	23.95	900.478	11	2.9	451.247	2	22.8	6930000	2	4377	1	569	579			133.37	27	95700000	27	25	34	56611	MSI60-related protein [Pinctada fucata]
HavC	365189155	A.A(+149.03)AAAAAAGGGAGGGAGAGAGAGAGAGGAGG.S	Y	23.48	2087.92	30	1.6	1044.97	2	26.77	3640000	1	5289	1	487	516	Benzyl isothiocyanate	A1:Benzyl isothiocyanate:1000.00	133.37	27	95700000	27	25	34	56611	MSI60-related protein [Pinctada fucata]
HavC	365189155	A.A(+43.01)AAAGGGAGGGAGAGAGA.G	Y	23.44	1213.54	18	0	607.779	2	27.83	0	1	5523	1	490	507	Carbamylation	A1:Carbamylation:1000.00	133.37	27	95700000	27	25	34	56611	MSI60-related protein [Pinctada fucata]
HavC	365189155	D.AAASAAAAAAAAAA(-.98).A	Y	23.4	1027.54	14	1.5	514.779	2	70.64	0	2	14619	1	547	560	Amidation	A14:Amidation:1000.00	133.37	27	95700000	27	25	34	56611	MSI60-related protein [Pinctada fucata]
HavC	365189155	G.A(+43.01)GAGAGAGAGAGGA.G	Y	23.05	957.426	14	1.1	479.721	2	20.64	4800000	1	3958	1	501	514	Carbamylation	A1:Carbamylation:1000.00	133.37	27	95700000	27	25	34	56611	MSI60-related protein [Pinctada fucata]
HavC	365189155	G.GSAAAAAAAAAAAAGGAGGRR(+144.04)GFRLG.G	Y	22.97	2300.17	26	1.5	1151.1	2	109.92	0	1	23434	1	447	472	Condensation product of 3-deoxyglucosone	R21:Condensation product of 3-deoxyglucosone:0.00	133.37	27	95700000	27	25	34	56611	MSI60-related protein [Pinctada fucata]
HavC	365189155	G.GGAGGGAGAGAGAGAGAGGAGGS(+87.05)AAAA.A	Y	22.85	1842.84	27	-4.8	922.422	2	44.3	0	2	8996	1	495	521	Phosphorylation to amine thiol	S23:Phosphorylation to amine thiol:1000.00	133.37	27	95700000	27	25	34	56611	MSI60-related protein [Pinctada fucata]
HavC	2204081	G.AGAGGGAGGGAGGGAGAGAGAGAGAGAGAGLG(+21.98).L	Y	36.32	2088.93	32	-1.8	1045.47	2	48.03	1250000	1	9956	1	117	148	Sodium adduct	G32:Sodium adduct:1000.00	129.7	19	20700000	24	9	43	61723	insoluble protein [Pinctada fucata]
HavC	2204081	G.AGAGGGAGGGAGGGAGAGAGAG(+14.02).A	Y	31.98	1398.62	22	0	700.319	2	32.27	4020000	1	6493	1	117	138	Methylation(C-term)	G22:Methylation(C-term):1000.00	129.7	19	20700000	24	9	43	61723	insoluble protein [Pinctada fucata]
HavC	2204081	L.GGGLGGLGGLGGLGGYGGS(-18.01)AAA.A	N	31.51	1656.82	22	-1.6	829.417	2	83.86	17100000	1	17693	3	264	285	Dehydration	S19:Dehydration:25.20	129.7	19	20700000	24	9	43	61723	insoluble protein [Pinctada fucata]
HavC	2204081	G.FGGLR(sub G)GLGGLGGGSA.A	N	31.09	1274.67	15	2.5	638.345	2	77.76	10900000	1	16373	2	495	509			129.7	19	20700000	24	9	43	61723	insoluble protein [Pinctada fucata]
HavC	2204081	G.A(+71.04)GGGAGGGAGGGAGAGA.G	N	30.52	1142.51	17	-0.1	572.26	2	24.24	37900000	1	4742	2	119	135	Propionamide (K X@N-term)	A1:Propionamide (K X@N-term):1000.00	129.7	19	20700000	24	9	43	61723	insoluble protein [Pinctada fucata]
HavC	2204081	G.LGGGLGGLGGLGGLGGYGGS(-18.01)AAA.A	N	30.42	1769.91	23	-3.5	885.957	2	94.11	0	2	19850	1	263	285	Dehydration	S20:Dehydration:28.73	129.7	19	20700000	24	9	43	61723	insoluble protein [Pinctada fucata]
HavC	2204081	M.G(+71.04)AGAGGGAGGGAGGGAGAGAGAGAGAG.A	Y	30.27	1768.78	27	1	885.4	2	45.34	0	2	9222	1	116	142	Propionamide (K X@N-term)	G1:Propionamide (K X@N-term):1000.00	129.7	19	20700000	24	9	43	61723	insoluble protein [Pinctada fucata]
HavC	2204081	F.GGLGGF(sub L)GGLGGGSAAAAAAAAAAASGGR(sub G).G	N	29.98	2130.06	28	1.1	711.027	3	85.51	1990000	1	18051	4	496	523			129.7	19	20700000	24	9	43	61723	insoluble protein [Pinctada fucata]
HavC	2204081	M.G(+71.04)AGAGGGAGGGAGGGAGAGAGAGAG.A	Y	29.4	1640.73	25	2.7	821.372	2	40.93	464000	2	8261	1	116	140	Propionamide (K X@N-term)	G1:Propionamide (K X@N-term):1000.00	129.7	19	20700000	24	9	43	61723	insoluble protein [Pinctada fucata]
HavC	2204081	G.AGAGGGAGGGAGGGAGAGAGA.G	Y	28.2	1327.59	21	-0.8	664.8	2	29.08	5300000	1	5796	3	117	137			129.7	19	20700000	24	9	43	61723	insoluble protein [Pinctada fucata]
HavC	2204081	L.GGGLGGLGGLGGLGGY(-18.01)GGSAAA.A	N	28.15	1656.82	22	-1.6	829.417	2	86.57	327000	1	18281	1	264	285	Dehydration	Y16:Dehydration:25.20	129.7	19	20700000	24	9	43	61723	insoluble protein [Pinctada fucata]
HavC	2204081	L.GGGLGGLGGLGGLGGYGGSAAA(+21.98).A	N	27.95	1696.81	22	-1.1	849.414	2	85.7	9170000	1	18092	2	264	285	Sodium adduct	A22:Sodium adduct:1000.00	129.7	19	20700000	24	9	43	61723	insoluble protein [Pinctada fucata]
HavC	2204081	G.FR(sub G)GLGGLGGLGGGSAA.A	N	27.94	1345.71	16	1.1	673.863	2	76.94	4330000	1	16197	2	495	510			129.7	19	20700000	24	9	43	61723	insoluble protein [Pinctada fucata]
HavC	2204081	M.G(+71.04)AGAGGGAGGGAGGGAGA.G	Y	27.36	1199.53	18	0.2	600.771	2	26.12	7170000	2	5080	1	116	133	Propionamide (K X@N-term)	G1:Propionamide (K X@N-term):1000.00	129.7	19	20700000	24	9	43	61723	insoluble protein [Pinctada fucata]
HavC	2204081	G.LGGLGGGLGGLGGLGGLGGYGGS(-18.01)AAA.A	N	26.86	1997.03	26	-3.4	999.52	2	97.7	736000	1	20715	2	260	285	Dehydration	S23:Dehydration:16.66	129.7	19	20700000	24	9	43	61723	insoluble protein [Pinctada fucata]
HavC	2204081	G.GAGAGAGAGAGAGA.G	N	26.68	914.42	14	-1.6	458.217	2	26.37	10500000	2	5134	2	130	143			129.7	19	20700000	24	9	43	61723	insoluble protein [Pinctada fucata]
HavC	2204081	L.GGLGGGLGGLGGLGGLGGYGGS(-18.01)AAA.A	N	26.55	1883.95	25	-3.3	942.979	2	94.97	54600000	2	20040	5	261	285	Dehydration	S22:Dehydration:19.16	129.7	19	20700000	24	9	43	61723	insoluble protein [Pinctada fucata]
HavC	2204081	G.SAAAAAAAAAAAA.G	N	26.22	957.488	13	0.3	479.751	2	61.55	4840000	2	12681	1	282	294			129.7	19	20700000	24	9	43	61723	insoluble protein [Pinctada fucata]
HavC	2204081	G.GGGFR(sub G)GLGGLGGLGGGS.A	N	26.06	1374.7	17	1.3	688.358	2	79.83	1750000	2	16649	1	492	508			129.7	19	20700000	24	9	43	61723	insoluble protein [Pinctada fucata]
HavC	2204081	M.G(+71.04)AGAGGGAGGGAGGGAGAGAGAGA.G	Y	24.47	1583.7	24	0.7	792.86	2	37.66	507000	1	7683	1	116	139	Propionamide (K X@N-term)	G1:Propionamide (K X@N-term):1000.00	129.7	19	20700000	24	9	43	61723	insoluble protein [Pinctada fucata]
HavC	2204081	G.AGAGGGAGGGAGGGAGAGA.G	Y	24.05	1199.53	19	-0.8	600.771	2	24.47	0	1	4792	1	117	135			129.7	19	20700000	24	9	43	61723	insoluble protein [Pinctada fucata]
HavC	2204081	G.GAGGGAGGGAGAGAGAGAGAGAG.A	N	23.3	1455.64	23	1.3	728.831	2	30.68	732000	1	6148	1	122	144			129.7	19	20700000	24	9	43	61723	insoluble protein [Pinctada fucata]
HavC	2204081	G.AGAGGGAGGGAGGGAGA.G	Y	23.12	1071.47	17	-0.4	536.742	2	21.57	2000000	1	4161	1	117	133			129.7	19	20700000	24	9	43	61723	insoluble protein [Pinctada fucata]
HavC	2204081	G.GFGVGLGGGFGGGFGGGS(+14.02)SA.A	N	23.05	1614.74	20	-0.9	808.378	2	74.33	533000	1	15626	1	563	582	Methylation(others)	S18:Methylation(others):11.06	129.7	19	20700000	24	9	43	61723	insoluble protein [Pinctada fucata]
HavC	2204081	A.GAGLGLGLGGGLGGGLGGLGGLGG(+258.09).L	N	22.92	2051.06	24	-7	1026.53	2	98.25	95700	1	20837	1	144	167	Diglutamyl	G24:Diglutamyl:1000.00	129.7	19	20700000	24	9	43	61723	insoluble protein [Pinctada fucata]
HavC	2204081	G.AGGGAGGGAGGGAGA.G	N	22.84	943.411	15	0.3	472.713	2	19.64	3850000	2	3706	1	119	133			129.7	19	20700000	24	9	43	61723	insoluble protein [Pinctada fucata]
HavC	2772914	L.GGLGGGLGGGLGGLGGGAGGAGAGGNG(+43.04).G	Y	38.63	1923.95	27	-4.6	962.978	2	96.52	8740000	2	20386	2	768	794	Carboxyl modification with ethanolamine	G27:Carboxyl modification with ethanolamine:1000.00	129.42	6	334000000	23	23	61	80315	precollagen D [Mytilus edulis]
HavC	2772914	G.GLGGGLGGGLGGLGGGAGGAGAGGNG(+43.04).G	Y	35.97	1866.93	26	-4.4	934.468	2	93.72	58300000	2	19763	13	769	794	Carboxyl modification with ethanolamine	G26:Carboxyl modification with ethanolamine:1000.00	129.42	6	334000000	23	23	61	80315	precollagen D [Mytilus edulis]
HavC	2772914	L.GGLGGGLGGGLGGLGGGAGG.A	Y	33.46	1396.71	20	-1.9	699.359	2	86.4	14000000	2	18123	3	768	787			129.42	6	334000000	23	23	61	80315	precollagen D [Mytilus edulis]
HavC	2772914	G.LGGLGGGLGGGLGGLGGGAGGAGAGGN(+43.04).G	Y	33.17	1980.01	27	-2.8	991.011	2	97.34	102000	1	20637	1	767	793	Carboxyl modification with ethanolamine	N27:Carboxyl modification with ethanolamine:1000.00	129.42	6	334000000	23	23	61	80315	precollagen D [Mytilus edulis]
HavC	2772914	G.GGAGGAGAGGN(+162.05)GGAGAGGAGG.N	Y	31.66	1518.63	21	-1	760.321	2	26.75	3970000	1	5286	2	783	803	Hexose (NSY)	N11:Hexose (NSY):1000.00	129.42	6	334000000	23	23	61	80315	precollagen D [Mytilus edulis]
HavC	2772914	G.GGAGGAGAGGN(+203.08)GGAGAGGAG.G	Y	31.61	1502.63	20	-1.4	752.323	2	31.27	2970000	1	6274	3	783	802	HexNAcylation (N)	N11:HexNAcylation (N):1000.00	129.42	6	334000000	23	23	61	80315	precollagen D [Mytilus edulis]
HavC	2772914	G.GGAGGAGAGGN(+162.05)GGAGAGGA.G	Y	31.04	1404.59	19	-1.2	703.3	2	30.15	7850000	2	5936	2	783	801	Hexose (NSY)	N11:Hexose (NSY):1000.00	129.42	6	334000000	23	23	61	80315	precollagen D [Mytilus edulis]
HavC	2772914	G.GLGGGLGGGLGGLGGGAG(-.98).G	Y	30.85	1281.68	18	-0.4	641.846	2	82.83	9310000	2	17321	2	769	786	Amidation	G18:Amidation:1000.00	129.42	6	334000000	23	23	61	80315	precollagen D [Mytilus edulis]
HavC	2772914	L.GGLGGGLGGGLGGLGGGAG.G	Y	30.02	1339.68	19	-0.6	670.849	2	86.62	25900000	2	18172	1	768	786			129.42	6	334000000	23	23	61	80315	precollagen D [Mytilus edulis]
HavC	2772914	G.GGAGGAGAGGN(+203.08)GGAGAGGAGG.N	Y	29.94	1559.66	21	-0.8	780.835	2	33.06	1330000	2	6560	3	783	803	HexNAcylation (N)	N11:HexNAcylation (N):1000.00	129.42	6	334000000	23	23	61	80315	precollagen D [Mytilus edulis]
HavC	2772914	G.GGAGGAGAGGN(+162.05)GGAGAGGAG.G	Y	29.81	1461.61	20	0.7	731.812	2	26.18	16700000	1	5159	2	783	802	Hexose (NSY)	N11:Hexose (NSY):1000.00	129.42	6	334000000	23	23	61	80315	precollagen D [Mytilus edulis]
HavC	2772914	G.GGLGGGLGGLGGGAGGAGAGGNG(+43.04).G	Y	29.56	1639.8	23	-5.6	820.904	2	90.16	30900000	2	18966	2	772	794	Carboxyl modification with ethanolamine	G23:Carboxyl modification with ethanolamine:1000.00	129.42	6	334000000	23	23	61	80315	precollagen D [Mytilus edulis]
HavC	2772914	G.LGGGLGGGLGGLGGGAGGAGAGGNG(+43.04).G	Y	29.02	1809.91	25	-7.6	905.955	2	94.52	1300000	2	19940	2	770	794	Carboxyl modification with ethanolamine	G25:Carboxyl modification with ethanolamine:1000.00	129.42	6	334000000	23	23	61	80315	precollagen D [Mytilus edulis]
HavC	2772914	G.GGAGGAGAGGN(+203.08)GGAGAGG.A	Y	28.7	1374.58	18	-1	688.295	2	25.76	2010000	1	5066	2	783	800	HexNAcylation (N)	N11:HexNAcylation (N):1000.00	129.42	6	334000000	23	23	61	80315	precollagen D [Mytilus edulis]
HavC	2772914	G.GLGGGLGGGLGGLGGGAGG.A	Y	28.52	1339.68	19	-1	670.849	2	86.11	50300000	2	18057	3	769	787			129.42	6	334000000	23	23	61	80315	precollagen D [Mytilus edulis]
HavC	2772914	A.GGLGGGLGGGLGGLGGA(-.98).G	Y	28.26	1224.66	17	-3.7	613.334	2	81.06	6950000	1	17085	2	744	760	Amidation	A17:Amidation:1000.00	129.42	6	334000000	23	23	61	80315	precollagen D [Mytilus edulis]
HavC	2772914	L.GGGLGGGLGGLGGGAGGAGAGGNG(+43.04).G	Y	27.96	1696.82	24	-2.1	849.418	2	87.77	13200000	1	18547	5	771	794	Carboxyl modification with ethanolamine	G24:Carboxyl modification with ethanolamine:1000.00	129.42	6	334000000	23	23	61	80315	precollagen D [Mytilus edulis]
HavC	2772914	G.GLGGGLGGLGGGAGGAGAGGNG(+43.04).G	Y	26.86	1582.78	22	-0.6	792.397	2	87.21	5440000	2	18307	1	773	794	Carboxyl modification with ethanolamine	G22:Carboxyl modification with ethanolamine:1000.00	129.42	6	334000000	23	23	61	80315	precollagen D [Mytilus edulis]
HavC	2772914	A.GGAGAGGN(+162.05)GGAGAGGA.G	Y	26.39	1219.51	16	0.6	610.761	2	23.32	4590000	1	4541	1	786	801	Hexose (NSY)	N8:Hexose (NSY):1000.00	129.42	6	334000000	23	23	61	80315	precollagen D [Mytilus edulis]
HavC	2772914	G.GAGGAGAGGN(+162.05)GGAGAGGAGG.N	Y	26.13	1461.61	20	-1.3	731.81	2	26.73	9720000	1	5282	2	784	803	Hexose (NSY)	N10:Hexose (NSY):1000.00	129.42	6	334000000	23	23	61	80315	precollagen D [Mytilus edulis]
HavC	2772914	L.GGGLGGGLGGLGGGAGG.A	Y	25.61	1169.58	17	-1.1	585.796	2	77.07	3740000	2	16032	1	771	787			129.42	6	334000000	23	23	61	80315	precollagen D [Mytilus edulis]
HavC	2772914	A.GGLGGGLGGGLGGLGGAGG(-.98).L	Y	25.25	1338.7	19	-0.5	670.357	2	79.78	301000	1	16808	1	744	762	Amidation	G19:Amidation:1000.00	129.42	6	334000000	23	23	61	80315	precollagen D [Mytilus edulis]
HavC	2772914	A.GGLGGGLGGGLGGLGGAG.G	Y	24.83	1282.66	18	-0.1	642.339	2	83.75	1920000	1	17669	1	744	761			129.42	6	334000000	23	23	61	80315	precollagen D [Mytilus edulis]
HavC	2772914	L.GGLGGGLGGGLGGLGGGAGG(+17.03).A	Y	24.63	1413.73	20	-3.6	707.871	2	86.53	9010000	2	18151	1	768	787	Replacement of proton with ammonium ion	G20:Replacement of proton with ammonium ion:1000.00	129.42	6	334000000	23	23	61	80315	precollagen D [Mytilus edulis]
HavC	2772914	L.GGLGGGLGGGLGGLGGGAG(+17.03).G	Y	24.49	1356.71	19	0.1	679.363	2	86.55	30000000	2	18157	1	768	786	Replacement of proton with ammonium ion	G19:Replacement of proton with ammonium ion:1000.00	129.42	6	334000000	23	23	61	80315	precollagen D [Mytilus edulis]
HavC	2772914	G.GGAGGAGAGGN(+203.08)GGAGAG.G	Y	23.09	1317.55	17	0.3	659.785	2	26.35	5550000	1	5198	1	783	799	HexNAcylation (N)	N11:HexNAcylation (N):1000.00	129.42	6	334000000	23	23	61	80315	precollagen D [Mytilus edulis]
HavC	2772914	A.GGAGAGGN(+162.05)GGAGAGGAG.G	Y	22.81	1276.53	17	1.6	639.272	2	21.92	9440000	1	4235	1	786	802	Hexose (NSY)	N8:Hexose (NSY):1000.00	129.42	6	334000000	23	23	61	80315	precollagen D [Mytilus edulis]
HavC	372558284	G.R(sub G)GFGGLGGLGGLGGGSAA.A	Y	31.78	1459.75	18	0.6	730.884	2	76.18	791000	1	16032	1	495	512			120.13	19	2930000	20	5	37	61921	insoluble matrix protein [Pinctada fucata]
HavC	372558284	L.GGGLGGLGGLGGLGGYGGS(-18.01)AAA.A	N	31.51	1656.82	22	-1.6	829.417	2	83.86	17100000	1	17693	3	266	287	Dehydration	S19:Dehydration:25.20	120.13	19	2930000	20	5	37	61921	insoluble matrix protein [Pinctada fucata]
HavC	372558284	G.FGGLR(sub G)GLGGLGGGSA.A	N	31.09	1274.67	15	2.5	638.345	2	77.76	10900000	1	16373	2	497	511			120.13	19	2930000	20	5	37	61921	insoluble matrix protein [Pinctada fucata]
HavC	372558284	M.G(+28.03)GGAGGGAGGGAGGGAGAGAGAGA.G	Y	30.76	1526.68	24	1.1	764.349	2	41.22	372000	2	8323	1	118	141	Ethylation	G1:Ethylation:82.98	120.13	19	2930000	20	5	37	61921	insoluble matrix protein [Pinctada fucata]
HavC	372558284	G.A(+71.04)GGGAGGGAGGGAGAGA.G	N	30.52	1142.51	17	-0.1	572.26	2	24.24	37900000	1	4742	2	121	137	Propionamide (K X@N-term)	A1:Propionamide (K X@N-term):1000.00	120.13	19	2930000	20	5	37	61921	insoluble matrix protein [Pinctada fucata]
HavC	372558284	G.LGGGLGGLGGLGGLGGYGGS(-18.01)AAA.A	N	30.42	1769.91	23	-3.5	885.957	2	94.11	0	2	19850	1	265	287	Dehydration	S20:Dehydration:28.73	120.13	19	2930000	20	5	37	61921	insoluble matrix protein [Pinctada fucata]
HavC	372558284	F.GGLGGF(sub L)GGLGGGSAAAAAAAAAAASGGR(sub G).G	N	29.98	2130.06	28	1.1	711.027	3	85.51	1990000	1	18051	4	498	525			120.13	19	2930000	20	5	37	61921	insoluble matrix protein [Pinctada fucata]
HavC	372558284	L.GGGLGGLGGLGGLGGY(-18.01)GGSAAA.A	N	28.15	1656.82	22	-1.6	829.417	2	86.57	327000	1	18281	1	266	287	Dehydration	Y16:Dehydration:25.20	120.13	19	2930000	20	5	37	61921	insoluble matrix protein [Pinctada fucata]
HavC	372558284	L.GGGLGGLGGLGGLGGYGGSAAA(+21.98).A	N	27.95	1696.81	22	-1.1	849.414	2	85.7	9170000	1	18092	2	266	287	Sodium adduct	A22:Sodium adduct:1000.00	120.13	19	2930000	20	5	37	61921	insoluble matrix protein [Pinctada fucata]
HavC	372558284	G.FR(sub G)GLGGLGGLGGGSAA.A	N	27.94	1345.71	16	1.1	673.863	2	76.94	4330000	1	16197	2	497	512			120.13	19	2930000	20	5	37	61921	insoluble matrix protein [Pinctada fucata]
HavC	372558284	M.G(+28.03)GGAGGGAGGGAGGGAGAGAGAGAGAG.A	Y	27.69	1711.76	27	1.8	856.89	2	43.01	244000	2	8715	1	118	144	Ethylation	G1:Ethylation:84.32	120.13	19	2930000	20	5	37	61921	insoluble matrix protein [Pinctada fucata]
HavC	372558284	M.G(+28.03)GGAGGGAGGGAGGGAGAGAGAGAG.A	Y	26.95	1583.7	25	-1.4	792.858	2	39.41	1520000	2	7930	1	118	142	Ethylation	G1:Ethylation:68.50	120.13	19	2930000	20	5	37	61921	insoluble matrix protein [Pinctada fucata]
HavC	372558284	G.LGGLGGGLGGLGGLGGLGGYGGS(-18.01)AAA.A	N	26.86	1997.03	26	-3.4	999.52	2	97.7	736000	1	20715	2	262	287	Dehydration	S23:Dehydration:16.66	120.13	19	2930000	20	5	37	61921	insoluble matrix protein [Pinctada fucata]
HavC	372558284	G.GAGAGAGAGAGAGA.G	N	26.68	914.42	14	-1.6	458.217	2	26.37	10500000	2	5134	2	132	145			120.13	19	2930000	20	5	37	61921	insoluble matrix protein [Pinctada fucata]
HavC	372558284	L.GGLGGGLGGLGGLGGLGGYGGS(-18.01)AAA.A	N	26.55	1883.95	25	-3.3	942.979	2	94.97	54600000	2	20040	5	263	287	Dehydration	S22:Dehydration:19.16	120.13	19	2930000	20	5	37	61921	insoluble matrix protein [Pinctada fucata]
HavC	372558284	G.SAAAAAAAAAAAA.G	N	26.22	957.488	13	0.3	479.751	2	61.55	4840000	2	12681	1	284	296			120.13	19	2930000	20	5	37	61921	insoluble matrix protein [Pinctada fucata]
HavC	372558284	G.GGGFR(sub G)GLGGLGGLGGGS.A	N	26.06	1374.7	17	1.3	688.358	2	79.83	1750000	2	16649	1	494	510			120.13	19	2930000	20	5	37	61921	insoluble matrix protein [Pinctada fucata]
HavC	372558284	M.G(+28.03)GGAGGGAGGGAGGGAGAGAGA.G	Y	25.35	1398.62	22	-1.9	700.318	2	32.81	0	1	6611	1	118	139	Ethylation	G1:Ethylation:61.41	120.13	19	2930000	20	5	37	61921	insoluble matrix protein [Pinctada fucata]
HavC	372558284	G.GAGGGAGGGAGAGAGAGAGAGAG.A	N	23.3	1455.64	23	1.3	728.831	2	30.68	732000	1	6148	1	124	146			120.13	19	2930000	20	5	37	61921	insoluble matrix protein [Pinctada fucata]
HavC	372558284	G.GFGVGLGGGFGGGFGGGS(+14.02)SA.A	N	23.05	1614.74	20	-0.9	808.378	2	74.33	533000	1	15626	1	565	584	Methylation(others)	S18:Methylation(others):11.06	120.13	19	2930000	20	5	37	61921	insoluble matrix protein [Pinctada fucata]
HavC	372558284	A.GAGLGLGLGGGLGGGLGGLGGLGG(+258.09).L	N	22.92	2051.06	24	-7	1026.53	2	98.25	95700	1	20837	1	146	169	Diglutamyl	G24:Diglutamyl:1000.00	120.13	19	2930000	20	5	37	61921	insoluble matrix protein [Pinctada fucata]
HavC	372558284	G.AGGGAGGGAGGGAGA.G	N	22.84	943.411	15	0.3	472.713	2	19.64	3850000	2	3706	1	121	135			120.13	19	2930000	20	5	37	61921	insoluble matrix protein [Pinctada fucata]
HavC	372558282	G.R(sub G)GFGGLGGLGGLGGGSAA.A	Y	31.78	1459.75	18	0.6	730.884	2	76.18	791000	1	16032	1	495	512			120.13	19	2930000	20	5	37	61921	insoluble matrix protein [Pinctada fucata]
HavC	372558282	L.GGGLGGLGGLGGLGGYGGS(-18.01)AAA.A	N	31.51	1656.82	22	-1.6	829.417	2	83.86	17100000	1	17693	3	266	287	Dehydration	S19:Dehydration:25.20	120.13	19	2930000	20	5	37	61921	insoluble matrix protein [Pinctada fucata]
HavC	372558282	G.FGGLR(sub G)GLGGLGGGSA.A	N	31.09	1274.67	15	2.5	638.345	2	77.76	10900000	1	16373	2	497	511			120.13	19	2930000	20	5	37	61921	insoluble matrix protein [Pinctada fucata]
HavC	372558282	M.G(+28.03)GGAGGGAGGGAGGGAGAGAGAGA.G	Y	30.76	1526.68	24	1.1	764.349	2	41.22	372000	2	8323	1	118	141	Ethylation	G1:Ethylation:82.98	120.13	19	2930000	20	5	37	61921	insoluble matrix protein [Pinctada fucata]
HavC	372558282	G.A(+71.04)GGGAGGGAGGGAGAGA.G	N	30.52	1142.51	17	-0.1	572.26	2	24.24	37900000	1	4742	2	121	137	Propionamide (K X@N-term)	A1:Propionamide (K X@N-term):1000.00	120.13	19	2930000	20	5	37	61921	insoluble matrix protein [Pinctada fucata]
HavC	372558282	G.LGGGLGGLGGLGGLGGYGGS(-18.01)AAA.A	N	30.42	1769.91	23	-3.5	885.957	2	94.11	0	2	19850	1	265	287	Dehydration	S20:Dehydration:28.73	120.13	19	2930000	20	5	37	61921	insoluble matrix protein [Pinctada fucata]
HavC	372558282	F.GGLGGF(sub L)GGLGGGSAAAAAAAAAAASGGR(sub G).G	N	29.98	2130.06	28	1.1	711.027	3	85.51	1990000	1	18051	4	498	525			120.13	19	2930000	20	5	37	61921	insoluble matrix protein [Pinctada fucata]
HavC	372558282	L.GGGLGGLGGLGGLGGY(-18.01)GGSAAA.A	N	28.15	1656.82	22	-1.6	829.417	2	86.57	327000	1	18281	1	266	287	Dehydration	Y16:Dehydration:25.20	120.13	19	2930000	20	5	37	61921	insoluble matrix protein [Pinctada fucata]
HavC	372558282	L.GGGLGGLGGLGGLGGYGGSAAA(+21.98).A	N	27.95	1696.81	22	-1.1	849.414	2	85.7	9170000	1	18092	2	266	287	Sodium adduct	A22:Sodium adduct:1000.00	120.13	19	2930000	20	5	37	61921	insoluble matrix protein [Pinctada fucata]
HavC	372558282	G.FR(sub G)GLGGLGGLGGGSAA.A	N	27.94	1345.71	16	1.1	673.863	2	76.94	4330000	1	16197	2	497	512			120.13	19	2930000	20	5	37	61921	insoluble matrix protein [Pinctada fucata]
HavC	372558282	M.G(+28.03)GGAGGGAGGGAGGGAGAGAGAGAGAG.A	Y	27.69	1711.76	27	1.8	856.89	2	43.01	244000	2	8715	1	118	144	Ethylation	G1:Ethylation:84.32	120.13	19	2930000	20	5	37	61921	insoluble matrix protein [Pinctada fucata]
HavC	372558282	M.G(+28.03)GGAGGGAGGGAGGGAGAGAGAGAG.A	Y	26.95	1583.7	25	-1.4	792.858	2	39.41	1520000	2	7930	1	118	142	Ethylation	G1:Ethylation:68.50	120.13	19	2930000	20	5	37	61921	insoluble matrix protein [Pinctada fucata]
HavC	372558282	G.LGGLGGGLGGLGGLGGLGGYGGS(-18.01)AAA.A	N	26.86	1997.03	26	-3.4	999.52	2	97.7	736000	1	20715	2	262	287	Dehydration	S23:Dehydration:16.66	120.13	19	2930000	20	5	37	61921	insoluble matrix protein [Pinctada fucata]
HavC	372558282	G.GAGAGAGAGAGAGA.G	N	26.68	914.42	14	-1.6	458.217	2	26.37	10500000	2	5134	2	132	145			120.13	19	2930000	20	5	37	61921	insoluble matrix protein [Pinctada fucata]
HavC	372558282	L.GGLGGGLGGLGGLGGLGGYGGS(-18.01)AAA.A	N	26.55	1883.95	25	-3.3	942.979	2	94.97	54600000	2	20040	5	263	287	Dehydration	S22:Dehydration:19.16	120.13	19	2930000	20	5	37	61921	insoluble matrix protein [Pinctada fucata]
HavC	372558282	G.SAAAAAAAAAAAA.G	N	26.22	957.488	13	0.3	479.751	2	61.55	4840000	2	12681	1	284	296			120.13	19	2930000	20	5	37	61921	insoluble matrix protein [Pinctada fucata]
HavC	372558282	G.GGGFR(sub G)GLGGLGGLGGGS.A	N	26.06	1374.7	17	1.3	688.358	2	79.83	1750000	2	16649	1	494	510			120.13	19	2930000	20	5	37	61921	insoluble matrix protein [Pinctada fucata]
HavC	372558282	M.G(+28.03)GGAGGGAGGGAGGGAGAGAGA.G	Y	25.35	1398.62	22	-1.9	700.318	2	32.81	0	1	6611	1	118	139	Ethylation	G1:Ethylation:61.41	120.13	19	2930000	20	5	37	61921	insoluble matrix protein [Pinctada fucata]
HavC	372558282	G.GAGGGAGGGAGAGAGAGAGAGAG.A	N	23.3	1455.64	23	1.3	728.831	2	30.68	732000	1	6148	1	124	146			120.13	19	2930000	20	5	37	61921	insoluble matrix protein [Pinctada fucata]
HavC	372558282	G.GFGVGLGGGFGGGFGGGS(+14.02)SA.A	N	23.05	1614.74	20	-0.9	808.378	2	74.33	533000	1	15626	1	565	584	Methylation(others)	S18:Methylation(others):11.06	120.13	19	2930000	20	5	37	61921	insoluble matrix protein [Pinctada fucata]
HavC	372558282	A.GAGLGLGLGGGLGGGLGGLGGLGG(+258.09).L	N	22.92	2051.06	24	-7	1026.53	2	98.25	95700	1	20837	1	146	169	Diglutamyl	G24:Diglutamyl:1000.00	120.13	19	2930000	20	5	37	61921	insoluble matrix protein [Pinctada fucata]
HavC	372558282	G.AGGGAGGGAGGGAGA.G	N	22.84	943.411	15	0.3	472.713	2	19.64	3850000	2	3706	1	121	135			120.13	19	2930000	20	5	37	61921	insoluble matrix protein [Pinctada fucata]
HavC	987895014	S.SAAAAAAAAAAASR.R	N	33.17	1129.58	14	-2.1	565.798	2	53.78	2440000	2	11026	1	57	70			108.35	17	62700000	11	6	13	44731	MSI60-related protein partial [BathyModiolus modiolus platifrons]
HavC	987895014	A.A(+43.01)AGAGAGGAGGAGGA.A	Y	32.41	1014.45	15	1.4	508.232	2	21.31	0	1	4104	1	22	36	Carbamylation	A1:Carbamylation:1000.00	108.35	17	62700000	11	6	13	44731	MSI60-related protein partial [BathyModiolus modiolus platifrons]
HavC	987895014	R.AAAAAAAAAAS(+42.01)ASAGGAGGLAVGFG.S	Y	32.05	1929.95	25	-4.3	965.98	2	111.62	0	2	23724	1	170	194	Acetylation (TSCYH)	S11:Acetylation (TSCYH):0.00	108.35	17	62700000	11	6	13	44731	MSI60-related protein partial [BathyModiolus modiolus platifrons]
HavC	987895014	R.RAAAAAAAAAASASAGGAGGL(+14.02).A	Y	30.16	1626.84	21	0.5	814.43	2	88.5	0	2	18592	1	169	189	Methylation(C-term)	L21:Methylation(C-term):1000.00	108.35	17	62700000	11	6	13	44731	MSI60-related protein partial [BathyModiolus modiolus platifrons]
HavC	987895014	A.GAGAGAGAGAGAGAGGGAGSGGGGGGSGS(-15.99).G	Y	29.57	1857.79	29	-0.1	929.905	2	24.74	2430000	2	4790	1	461	489	Deoxy	S29:Deoxy:20.41	108.35	17	62700000	11	6	13	44731	MSI60-related protein partial [BathyModiolus modiolus platifrons]
HavC	987895014	G.A(+43.01)GAGAGAGAGAGAGGGAG.S	N	28.36	1199.53	18	-0.5	600.771	2	26.89	7170000	2	5245	1	462	479	Carbamylation	A1:Carbamylation:1000.00	108.35	17	62700000	11	6	13	44731	MSI60-related protein partial [BathyModiolus modiolus platifrons]
HavC	987895014	A.SAGAGAGAGAGAGAGAGAGGGAGSGGGGGGSGS(-15.99).G	Y	28.25	2143.92	33	-3.5	1072.96	2	31.23	388000	2	6166	1	457	489	Deoxy	S33:Deoxy:0.00	108.35	17	62700000	11	6	13	44731	MSI60-related protein partial [BathyModiolus modiolus platifrons]
HavC	987895014	A.GAGAGAGAGAGAGAGGG.A	N	27.7	1085.48	17	0.2	543.75	2	25.91	12000000	2	5036	1	461	477			108.35	17	62700000	11	6	13	44731	MSI60-related protein partial [BathyModiolus modiolus platifrons]
HavC	987895014	A.A(+43.01)AAGAGAGGAGGAGG.A	Y	27.01	1014.45	15	0	508.231	2	22.02	59900000	2	4213	1	21	35	Carbamylation	A1:Carbamylation:1000.00	108.35	17	62700000	11	6	13	44731	MSI60-related protein partial [BathyModiolus modiolus platifrons]
HavC	987895014	A.GAGAGAGAGAGAGA.G	N	26.68	914.42	14	-1.6	458.217	2	26.37	10500000	2	5134	2	459	472			108.35	17	62700000	11	6	13	44731	MSI60-related protein partial [BathyModiolus modiolus platifrons]
HavC	987895014	S.SAAAAAAAAAAASR(+31.99).R	N	25.59	1161.57	14	-1.4	581.793	2	38.63	1550000	1	7896	1	57	70	Dihydroxy	R14:Dihydroxy:1000.00	108.35	17	62700000	11	6	13	44731	MSI60-related protein partial [BathyModiolus modiolus platifrons]
HavC	987895014	A.AAAAAAAAASR.R	N	23.95	900.478	11	2.9	451.247	2	22.8	6930000	2	4377	1	60	70			108.35	17	62700000	11	6	13	44731	MSI60-related protein partial [BathyModiolus modiolus platifrons]
HavC	918339035	G.IGGGGIGGGIGGGGIGGGGS(+42.01)GG.G	Y	35.36	1568.75	22	0.2	785.385	2	87.81	7680000	2	18440	1	77	98	Acetylation (TSCYH)	S20:Acetylation (TSCYH):1000.00	101.96	26	125000000	11	11	16	16482	hypothetical protein OCBIM_22008720mg partial [Octopus bimaculoides]
HavC	918339035	G.IGGGGIGGGIGGGGIGGGGS(+42.01)G.G	Y	33.02	1511.73	21	-0.3	756.874	2	87.59	12400000	2	18391	2	77	97	Acetylation (TSCYH)	S20:Acetylation (TSCYH):1000.00	101.96	26	125000000	11	11	16	16482	hypothetical protein OCBIM_22008720mg partial [Octopus bimaculoides]
HavC	918339035	G.IGGGGIGGGIGGGGIGGG(+14.02).G	Y	31.86	1282.66	18	0.1	642.339	2	84.28	1920000	1	17784	1	77	94	Methylation(C-term)	G18:Methylation(C-term):1000.00	101.96	26	125000000	11	11	16	16482	hypothetical protein OCBIM_22008720mg partial [Octopus bimaculoides]
HavC	918339035	F.GGGIGGGGIGGGIGGGGIGGGGSGGG(-.98).D	Y	30.01	1753.85	26	-4.5	877.926	2	87.47	2130000	2	18365	1	74	99	Amidation	G26:Amidation:1000.00	101.96	26	125000000	11	11	16	16482	hypothetical protein OCBIM_22008720mg partial [Octopus bimaculoides]
HavC	918339035	G.IGGGGIGGGIGGGGI.G	Y	29.77	1097.58	15	1	549.799	2	84.95	59400000	1	17928	3	77	91			101.96	26	125000000	11	11	16	16482	hypothetical protein OCBIM_22008720mg partial [Octopus bimaculoides]
HavC	918339035	G.GGIGGGGIGGGIGGGGIGGGGSGGG(-.98).D	Y	29.75	1696.82	25	-5.6	849.415	2	87.39	18000000	2	18346	2	75	99	Amidation	G25:Amidation:1000.00	101.96	26	125000000	11	11	16	16482	hypothetical protein OCBIM_22008720mg partial [Octopus bimaculoides]
HavC	918339035	G.GGIGGGIGGGIGGGGGGFGGGIGG(+14.02).G	Y	28.22	1714.84	24	-1.6	858.425	2	86.65	0	2	18179	1	56	79	Methylation(C-term)	G24:Methylation(C-term):1000.00	101.96	26	125000000	11	11	16	16482	hypothetical protein OCBIM_22008720mg partial [Octopus bimaculoides]
HavC	918339035	G.IGGGGIGGGIGGGGIGGGG(+14.02).S	Y	27.79	1339.68	19	0.9	670.85	2	87.14	1750000	2	18290	1	77	95	Methylation(C-term)	G19:Methylation(C-term):1000.00	101.96	26	125000000	11	11	16	16482	hypothetical protein OCBIM_22008720mg partial [Octopus bimaculoides]
HavC	918339035	G.IGGGGIGGGIGGGGIGGGGS(+42.01)GGG.D	Y	27.07	1625.78	23	0.8	813.896	2	88.22	502000	2	18531	1	77	99	Acetylation (TSCYH)	S20:Acetylation (TSCYH):1000.00	101.96	26	125000000	11	11	16	16482	hypothetical protein OCBIM_22008720mg partial [Octopus bimaculoides]
HavC	918339035	G.GIGGGGIGGGIGGGGI.G	Y	26.21	1154.6	16	0.1	578.309	2	87.52	21400000	2	18376	1	76	91			101.96	26	125000000	11	11	16	16482	hypothetical protein OCBIM_22008720mg partial [Octopus bimaculoides]
HavC	918339035	G.GGIGGGGIGGGIGGGGIGGGGSGG.G	Y	23.06	1640.79	24	-0.8	821.4	2	86.31	0	2	18103	1	75	98			101.96	26	125000000	11	11	16	16482	hypothetical protein OCBIM_22008720mg partial [Octopus bimaculoides]
HavC	918339035	G.IGGGGIGGGIGGGGIGGGGS(-15.99)GG.G	Y	23.01	1510.75	22	-1.6	756.38	2	80.62	157000	1	16989	1	77	98	Deoxy	S20:Deoxy:1000.00	101.96	26	125000000	11	11	16	16482	hypothetical protein OCBIM_22008720mg partial [Octopus bimaculoides]
HavC	353558783	G.A(+43.01)GAGAGAGAGAGGGAGA.G	Y	30.65	1142.51	17	0	572.26	2	23.69	53200000	1	4621	3	215	231	Carbamylation	A1:Carbamylation:1000.00	97.8	9	68900000	13	10	17	38273	RecName: Full=Glycine-rich protein 1; AltName: Full=Nacre uncharacterized shell protein 4; Short=NUSP4; Flags: Precursor
HavC	353558783	G.A(+43.01)GAGAGAGAGAGAGGGAGAG.A	Y	29.65	1327.59	20	-0.3	664.8	2	32.52	2280000	2	6445	1	213	232	Carbamylation	A1:Carbamylation:1000.00	97.8	9	68900000	13	10	17	38273	RecName: Full=Glycine-rich protein 1; AltName: Full=Nacre uncharacterized shell protein 4; Short=NUSP4; Flags: Precursor
HavC	353558783	G.A(+43.01)GAGAGAGAGAGAGGGAGA.G	Y	29.56	1270.56	19	0.5	636.29	2	30.69	1310000	2	6051	1	213	231	Carbamylation	A1:Carbamylation:1000.00	97.8	9	68900000	13	10	17	38273	RecName: Full=Glycine-rich protein 1; AltName: Full=Nacre uncharacterized shell protein 4; Short=NUSP4; Flags: Precursor
HavC	353558783	G.A(+43.01)GAGAGAGAGAGAGGGAG.A	N	28.36	1199.53	18	-0.5	600.771	2	26.89	7170000	2	5245	1	213	230	Carbamylation	A1:Carbamylation:1000.00	97.8	9	68900000	13	10	17	38273	RecName: Full=Glycine-rich protein 1; AltName: Full=Nacre uncharacterized shell protein 4; Short=NUSP4; Flags: Precursor
HavC	353558783	G.A(+43.01)GAGAGAGAGAGGGAGAGAG.A	Y	28.34	1327.59	20	-1.8	664.799	2	29.6	5300000	1	5912	1	215	234	Carbamylation	A1:Carbamylation:1000.00	97.8	9	68900000	13	10	17	38273	RecName: Full=Glycine-rich protein 1; AltName: Full=Nacre uncharacterized shell protein 4; Short=NUSP4; Flags: Precursor
HavC	353558783	G.GAGAGAGAGAGAGAGGG.A	N	27.7	1085.48	17	0.2	543.75	2	25.91	12000000	2	5036	1	212	228			97.8	9	68900000	13	10	17	38273	RecName: Full=Glycine-rich protein 1; AltName: Full=Nacre uncharacterized shell protein 4; Short=NUSP4; Flags: Precursor
HavC	353558783	G.A(+43.01)GAGAGAGAGAGGGAGAGAGA.G	Y	27.34	1398.62	21	-0.1	700.319	2	31.75	4020000	1	6377	1	215	235	Carbamylation	A1:Carbamylation:1000.00	97.8	9	68900000	13	10	17	38273	RecName: Full=Glycine-rich protein 1; AltName: Full=Nacre uncharacterized shell protein 4; Short=NUSP4; Flags: Precursor
HavC	353558783	G.GAGAGAGAGAGAGA.G	N	26.68	914.42	14	-1.6	458.217	2	26.37	10500000	2	5134	2	212	225			97.8	9	68900000	13	10	17	38273	RecName: Full=Glycine-rich protein 1; AltName: Full=Nacre uncharacterized shell protein 4; Short=NUSP4; Flags: Precursor
HavC	353558783	G.A(+43.01)GAGAGAGAGAGAGGGAGAGAGAG.A	Y	24.39	1583.7	24	2.3	792.861	2	35.7	536000	1	7250	2	213	236	Carbamylation	A1:Carbamylation:1000.00	97.8	9	68900000	13	10	17	38273	RecName: Full=Glycine-rich protein 1; AltName: Full=Nacre uncharacterized shell protein 4; Short=NUSP4; Flags: Precursor
HavC	353558783	G.AGGGAGAGAGAGAS(+14.02)AGAGAGGAQGDA.E	Y	24.37	1827.81	26	2.2	914.914	2	39.88	0	1	8172	1	225	250	Methylation(others)	S14:Methylation(others):24.15	97.8	9	68900000	13	10	17	38273	RecName: Full=Glycine-rich protein 1; AltName: Full=Nacre uncharacterized shell protein 4; Short=NUSP4; Flags: Precursor
HavC	353558783	A.GAGAGGGAGAGAGAGAS(-20.03)AGAGAGGAQG.D	Y	24.05	1792.78	27	-4.1	897.395	2	36.48	0	1	7423	1	222	248	Formation of five membered aromatic heterocycle	S17:Formation of five membered aromatic heterocycle:1000.00	97.8	9	68900000	13	10	17	38273	RecName: Full=Glycine-rich protein 1; AltName: Full=Nacre uncharacterized shell protein 4; Short=NUSP4; Flags: Precursor
HavC	353558783	G.G(+43.01)AGAGAGAGAGAGAGGGAGAG.A	Y	23.7	1384.61	21	-0.5	693.311	2	30.4	733000	1	6087	1	212	232	Carbamylation	G1:Carbamylation:1000.00	97.8	9	68900000	13	10	17	38273	RecName: Full=Glycine-rich protein 1; AltName: Full=Nacre uncharacterized shell protein 4; Short=NUSP4; Flags: Precursor
HavC	353558783	A.GAGAGAGGGAGAGAGAGAS(+117.00)AGAGAGGAQ.G	Y	23.32	2000.84	28	3.3	1001.43	2	44.93	1500000	1	9284	1	220	247	Phospho-propargylamine	S19:Phospho-propargylamine:1000.00	97.8	9	68900000	13	10	17	38273	RecName: Full=Glycine-rich protein 1; AltName: Full=Nacre uncharacterized shell protein 4; Short=NUSP4; Flags: Precursor
HavC	961112486	A.SAAAAAAAAAAAAAV(-.98).N	Y	32.35	1126.61	15	-2	564.311	2	82.03	10200000	1	17297	3	71	85	Amidation	V15:Amidation:1000.00	97.49	5	354000000	11	10	29	50951	PREDICTED: transcription factor hamlet-like partial [Octopus bimaculoides]
HavC	961112486	A.AAAAAAAAAAVN(+.98)SAVGA.R	Y	28.25	1327.67	17	-2.9	664.842	2	60.73	15000000	2	12506	2	75	91	Deamidation (NQ)	N12:Deamidation (NQ):1000.00	97.49	5	354000000	11	10	29	50951	PREDICTED: transcription factor hamlet-like partial [Octopus bimaculoides]
HavC	961112486	A.AAAAAAAAVN(+.98)SAVGA.R	Y	28.09	1185.6	15	0.6	593.807	2	55.15	25100000	2	11320	4	77	91	Deamidation (NQ)	N10:Deamidation (NQ):1000.00	97.49	5	354000000	11	10	29	50951	PREDICTED: transcription factor hamlet-like partial [Octopus bimaculoides]
HavC	961112486	A.SAAAAAAAAAAAAAVN(+.98)SAVGARTGTVT.S	Y	27.78	2243.15	27	4.4	1122.59	2	111.79	0	2	23761	1	71	97	Deamidation (NQ)	N16:Deamidation (NQ):1000.00	97.49	5	354000000	11	10	29	50951	PREDICTED: transcription factor hamlet-like partial [Octopus bimaculoides]
HavC	961112486	A.SAAAAAAAAAAAAAVN(+17.03).S	Y	27.05	1258.66	16	-1.1	630.338	2	86.75	26700000	2	18203	3	71	86	Replacement of proton with ammonium ion	N16:Replacement of proton with ammonium ion:1000.00	97.49	5	354000000	11	10	29	50951	PREDICTED: transcription factor hamlet-like partial [Octopus bimaculoides]
HavC	961112486	A.AAAAAAAVN(+.98)SAVGA.R	Y	26.48	1114.56	14	0	558.288	2	38.72	98500000	2	7779	6	78	91	Deamidation (NQ)	N9:Deamidation (NQ):1000.00	97.49	5	354000000	11	10	29	50951	PREDICTED: transcription factor hamlet-like partial [Octopus bimaculoides]
HavC	961112486	A.SAAAAAAAAAAAAAVN(-.98).S	Y	26.25	1240.65	16	1.8	621.335	2	85.39	1910000	2	17893	1	71	86	Amidation	N16:Amidation:1000.00	97.49	5	354000000	11	10	29	50951	PREDICTED: transcription factor hamlet-like partial [Octopus bimaculoides]
HavC	961112486	A.SAAAAAAAAAAAAAVN.S	Y	26.22	1241.64	16	-0.6	621.825	2	87.26	60100000	2	18317	3	71	86			97.49	5	354000000	11	10	29	50951	PREDICTED: transcription factor hamlet-like partial [Octopus bimaculoides]
HavC	961112486	A.SAAAAAAAAAAAA.A	N	26.22	957.488	13	0.3	479.751	2	61.55	4840000	2	12681	1	71	83			97.49	5	354000000	11	10	29	50951	PREDICTED: transcription factor hamlet-like partial [Octopus bimaculoides]
HavC	961112486	A.AAAAAAAAAAAVN(+.98)SAVGA.R	Y	24.65	1398.71	18	1.3	700.363	2	65.27	3230000	2	13473	1	74	91	Deamidation (NQ)	N13:Deamidation (NQ):1000.00	97.49	5	354000000	11	10	29	50951	PREDICTED: transcription factor hamlet-like partial [Octopus bimaculoides]
HavC	961112486	A.AAAAAAAAAVN(+.98)SAVGA.R	Y	24.05	1256.64	16	-1.2	629.324	2	56.04	17300000	2	11507	2	76	91	Deamidation (NQ)	N11:Deamidation (NQ):1000.00	97.49	5	354000000	11	10	29	50951	PREDICTED: transcription factor hamlet-like partial [Octopus bimaculoides]
HavC	961112486	A.AAAAAAVN(+.98)SAVGA.R	Y	23.2	1043.52	13	-0.1	522.769	2	31	92800000	2	6118	1	79	91	Deamidation (NQ)	N8:Deamidation (NQ):1000.00	97.49	5	354000000	11	10	29	50951	PREDICTED: transcription factor hamlet-like partial [Octopus bimaculoides]
HavC	961112486	A.AAAAAAAAAAAAVNSAVGAR(-43.05)T.G	Y	23	1682.86	21	-1.6	842.435	2	91.23	3580000	2	19206	1	73	93	Arginine oxidation to glutamic semialdehyde	R20:Arginine oxidation to glutamic semialdehyde:1000.00	97.49	5	354000000	11	10	29	50951	PREDICTED: transcription factor hamlet-like partial [Octopus bimaculoides]
HavC	1242807733	G.LGGGLGGGLGGGLGGGLGGS(+380.15).G	Y	31.17	1848.91	20	-1.7	925.461	2	112.27	1110000	1	23952	2	56	75	Nucleophilic addition to cytopiloyne+H2O	S20:Nucleophilic addition to cytopiloyne+H2O:122.99	96.18	51	153000000	12	10	18	11637	glycine-rich cell wall structural protein-like [CrassOstrea edulis virginica]
HavC	1242807733	G.GGLGGGLGGGLGGGLGGG(+14.02).L	Y	30.09	1282.66	18	-3.1	642.337	2	87.73	15900000	2	18422	2	30	47	Methylation(C-term)	G18:Methylation(C-term):1000.00	96.18	51	153000000	12	10	18	11637	glycine-rich cell wall structural protein-like [CrassOstrea edulis virginica]
HavC	1242807733	G.GLGGGLGGGLGGGLGGG(+14.02).L	Y	29.14	1225.64	17	0.8	613.828	2	84.96	60800000	1	17930	4	31	47	Methylation(C-term)	G17:Methylation(C-term):1000.00	96.18	51	153000000	12	10	18	11637	glycine-rich cell wall structural protein-like [CrassOstrea edulis virginica]
HavC	1242807733	I.GGGIGGGLGGLGGLGGQGG.I	Y	29.06	1396.71	19	1.5	699.361	2	85.48	3290000	2	17913	1	93	111			96.18	51	153000000	12	10	18	11637	glycine-rich cell wall structural protein-like [CrassOstrea edulis virginica]
HavC	1242807733	G.GGLGGGLGGGLGGGLGGGLG(+258.09).G	Y	26.66	1696.84	20	-5	849.422	2	88.97	0	2	18697	1	30	49	Diglutamyl	G20:Diglutamyl:1000.00	96.18	51	153000000	12	10	18	11637	glycine-rich cell wall structural protein-like [CrassOstrea edulis virginica]
HavC	1242807733	G.GLGGGLGGGLGGGLGGSGGSQWSK.S	Y	26.15	1971.98	24	3.3	986.999	2	91.11	0	1	19271	1	59	82			96.18	51	153000000	12	10	18	11637	glycine-rich cell wall structural protein-like [CrassOstrea edulis virginica]
HavC	1242807733	G.GGLGGGLGGGLGGGLGGGLGGSGGSQ(+29.02).W	Y	24.39	1940.96	26	7.8	971.492	2	94.04	5370000	2	19835	1	54	79	Deamidation followed by esterification with ethanol	Q26:Deamidation followed by esterification with ethanol:1000.00	96.18	51	153000000	12	10	18	11637	glycine-rich cell wall structural protein-like [CrassOstrea edulis virginica]
HavC	1242807733	G.GLGGGLGGGLGGGLGGSGGS(-18.01)QWSK.S	Y	24.03	1953.97	24	-4.2	977.986	2	91.16	200000	1	19282	1	59	82	Dehydration	S20:Dehydration:0.00	96.18	51	153000000	12	10	18	11637	glycine-rich cell wall structural protein-like [CrassOstrea edulis virginica]
HavC	1242807733	G.GLGGGLGGGLGGGLGG.G	N	23.98	1154.6	16	-0.7	578.309	2	87.02	33000000	2	18263	1	31	46			96.18	51	153000000	12	10	18	11637	glycine-rich cell wall structural protein-like [CrassOstrea edulis virginica]
HavC	1242807733	G.GLGGGLGGGLGGGLGGSGGSQW(+14.02).S	Y	23.81	1770.86	22	-4.2	886.436	2	83.42	212000	1	17599	1	59	80	Methylation(C-term)	W22:Methylation(C-term):1000.00	96.18	51	153000000	12	10	18	11637	glycine-rich cell wall structural protein-like [CrassOstrea edulis virginica]
HavC	1242807733	I.GGGIGGGLGGLGGLGGQ.G	Y	23.42	1282.66	17	2.4	642.34	2	86.78	66600000	2	18208	1	93	109			96.18	51	153000000	12	10	18	11637	glycine-rich cell wall structural protein-like [CrassOstrea edulis virginica]
HavC	1242807733	G.GLGGGLGGGLGGGLGGGLGGSG.G	Y	23.39	1582.81	22	-2.8	792.408	2	83.35	0	1	17583	1	55	76			96.18	51	153000000	12	10	18	11637	glycine-rich cell wall structural protein-like [CrassOstrea edulis virginica]
HavC	1242807733	G.GGLGGGLGGGLGGGLGG.G	N	22.89	1211.63	17	1.6	606.821	2	87.19	9860000	2	18301	1	30	46			96.18	51	153000000	12	10	18	11637	glycine-rich cell wall structural protein-like [CrassOstrea edulis virginica]
HavC	1242807640	S.G(+71.04)LGGLGGLGGLGGGLGGKGGGGMGGK.G	Y	31.46	2068.08	26	-6.7	1035.04	2	100.89	251000	1	21422	1	120	145	Propionamide (K X@N-term)	G1:Propionamide (K X@N-term):76.16	86.73	18	40200000	6	6	12	12167	glycine-rich protein 23-like [CrassOstrea edulis virginica]
HavC	1242807640	L.GGLGGLGGLGGGLGGKGGGGMGGK(+226.08)G.Y	Y	30.24	2110.04	25	-2	1056.03	2	94.85	276000	1	20090	1	122	146	Biotinylation	K24:Biotinylation:49.35	86.73	18	40200000	6	6	12	12167	glycine-rich protein 23-like [CrassOstrea edulis virginica]
HavC	1242807640	L.GGLGGLGGLGGGLGGKGGGGMGG(+14.02).K	Y	28.29	1712.86	23	-3.6	857.436	2	83.08	207000	1	17526	1	122	144	Methylation(C-term)	G23:Methylation(C-term):1000.00	86.73	18	40200000	6	6	12	12167	glycine-rich protein 23-like [CrassOstrea edulis virginica]
HavC	1242807640	L.GGLGGLGGLGGGLGGKGGGGMGGKG.Y	Y	28.27	1883.96	25	-7.3	942.982	2	95.72	39200000	1	20280	5	122	146			86.73	18	40200000	6	6	12	12167	glycine-rich protein 23-like [CrassOstrea edulis virginica]
HavC	1242807640	L.GGLGGLGGLGGGLGGKGGGGMGGK(+21.98).G	Y	27.98	1848.92	24	-2.7	925.467	2	113.28	0	1	24177	1	122	145	Sodium adduct	K24:Sodium adduct:1000.00	86.73	18	40200000	6	6	12	12167	glycine-rich protein 23-like [CrassOstrea edulis virginica]
HavC	1242807640	S.GLGGLGGLGGLGGGLGGKGGGGMGGK.G	Y	27.76	1997.05	26	-7	999.524	2	100.42	130000	1	21318	1	120	145			86.73	18	40200000	6	6	12	12167	glycine-rich protein 23-like [CrassOstrea edulis virginica]
HavC	1242807640	S.GLGGLGGLGGLGGGLGGK(+225.09)GGGGM.G	Y	26.87	1980	23	-0.6	991.008	2	99.98	161000	1	21219	1	120	142	Iminobiotinylation	K18:Iminobiotinylation:86.55	86.73	18	40200000	6	6	12	12167	glycine-rich protein 23-like [CrassOstrea edulis virginica]
HavC	1242807640	G.GLGGLGGGLGGKGGGGM(+15.99)GGK(+42.01).G	Y	25.05	1600.8	20	-2.5	801.405	2	90.05	47.5	2	18943	1	126	145	Oxidation (M); Acetylation (K)	M17:Oxidation (M):1000.00;K20:Acetylation (K):40.94	86.73	18	40200000	6	6	12	12167	glycine-rich protein 23-like [CrassOstrea edulis virginica]
HavC	1207960950	K.ILIVITDGSSDNPR(+14.02)ETRKQ(+.98)A.N	Y	33.91	2227.18	20	-5.3	1114.59	2	83.16	93700	1	17542	1	130	149	Methylation(KR); Deamidation (NQ)	R14:Methylation(KR):0.00;Q19:Deamidation (NQ):0.00	85.06	2	2310000	5	5	9	289150	uncharacterized protein LOC110461617 [Mizuhopecten yessoensis]
HavC	1207960950	K.ILIVITDGSSDNP(+13.98)RETRKQA.N	Y	33.85	2226.16	20	2.2	1114.09	2	82.32	0	1	17361	1	130	149	Proline oxidation to pyroglutamic acid	P13:Proline oxidation to pyroglutamic acid:1000.00	85.06	2	2310000	5	5	9	289150	uncharacterized protein LOC110461617 [Mizuhopecten yessoensis]
HavC	1207960950	F.STIIGETVGLTPFK(+27.99).P	Y	31.68	1489.8	14	2.4	745.91	2	85.82	237000	1	18119	1	491	504	Formylation	K14:Formylation:98.18	85.06	2	2310000	5	5	9	289150	uncharacterized protein LOC110461617 [Mizuhopecten yessoensis]
HavC	1207960950	G.GQGGAGT(-15.99)GGQGGAGAGGQGGA.G	Y	30.36	1512.67	21	1.8	757.342	2	38.06	693000	2	7639	1	1746	1766	Deoxy	T7:Deoxy:1000.00	85.06	2	2310000	5	5	9	289150	uncharacterized protein LOC110461617 [Mizuhopecten yessoensis]
HavC	1207960950	K.ILIVITDGSSDN(+.98)PRETR(+14.02)KQA.N	Y	28.53	2227.18	20	-8.7	1114.59	2	84.85	272000	1	17908	2	130	149	Deamidation (NQ); Methylation(KR)	N12:Deamidation (NQ):17.76;R17:Methylation(KR):0.00	85.06	2	2310000	5	5	9	289150	uncharacterized protein LOC110461617 [Mizuhopecten yessoensis]
HavC	1207960950	G.GQGGAGT(-15.99)GGQGGAGAGGQGGAG.T	Y	26.81	1569.69	22	-2.3	785.849	2	30.8	523000	1	6175	2	1746	1767	Deoxy	T7:Deoxy:1000.00	85.06	2	2310000	5	5	9	289150	uncharacterized protein LOC110461617 [Mizuhopecten yessoensis]
HavC	1207960950	G.QGGAGAGGQGGAGTGGQ(+.98)GGAW.A	Y	23.95	1658.7	21	3.3	830.362	2	20.7	489000	2	3931	1	1755	1775	Deamidation (NQ)	Q17:Deamidation (NQ):30.66	85.06	2	2310000	5	5	9	289150	uncharacterized protein LOC110461617 [Mizuhopecten yessoensis]
HavC	405973183	G.QQGGAGGQGGAR(+39.99)GGQHGAQGGAQGGAQ.R	Y	28.79	2344.04	27	0.9	1173.03	2	31.9	8190000	1	6410	2	682	708	Glyoxal-derived hydroimiadazolone	R12:Glyoxal-derived hydroimiadazolone:1000.00	80.93	3	16400000	6	6	7	145227	Protein piccolo [CrassOstrea edulis gigas]
HavC	405973183	A.QQGGQGGAQGGQGGAQG.G	Y	27.81	1441.63	17	0.2	721.822	2	29.02	702000	1	5784	1	588	604			80.93	3	16400000	6	6	7	145227	Protein piccolo [CrassOstrea edulis gigas]
HavC	405973183	W.QGAQQGGQGGAQGGQGGAQG.G	Y	27.24	1697.75	20	1.3	849.882	2	34.84	3130000	1	7060	1	585	604			80.93	3	16400000	6	6	7	145227	Protein piccolo [CrassOstrea edulis gigas]
HavC	405973183	G.QQGGAGGQGGAR(+39.99)GGQHGAQGGAQGGA.Q	Y	25.95	2215.98	26	-2.9	1108.99	2	29.59	608000	1	5909	1	682	707	Glyoxal-derived hydroimiadazolone	R12:Glyoxal-derived hydroimiadazolone:1000.00	80.93	3	16400000	6	6	7	145227	Protein piccolo [CrassOstrea edulis gigas]
HavC	405973183	Q.GAQQGGQGGAQGGQGGAQG.G	Y	25.36	1569.69	19	3.3	785.854	2	35.59	163000	1	7225	1	586	604			80.93	3	16400000	6	6	7	145227	Protein piccolo [CrassOstrea edulis gigas]
HavC	405973183	G.QQGGAGGQGGAR(+39.99)GGQHGAQGGAQG.G	Y	23.51	2087.92	24	1.1	1044.97	2	27.34	3640000	1	5415	1	682	705	Glyoxal-derived hydroimiadazolone	R12:Glyoxal-derived hydroimiadazolone:1000.00	80.93	3	16400000	6	6	7	145227	Protein piccolo [CrassOstrea edulis gigas]
HavC	762121999	G.QQGGAGGQGGAR(+39.99)GGQHGAQGGAQGGAQ.R	Y	28.79	2344.04	27	0.9	1173.03	2	31.9	8190000	1	6410	2	682	708	Glyoxal-derived hydroimiadazolone	R12:Glyoxal-derived hydroimiadazolone:1000.00	80.93	3	16400000	6	6	7	145227	PREDICTED: uncharacterized protein LOC105339864 [CrassOstrea edulis gigas]
HavC	762121999	A.QQGGQGGAQGGQGGAQG.G	Y	27.81	1441.63	17	0.2	721.822	2	29.02	702000	1	5784	1	588	604			80.93	3	16400000	6	6	7	145227	PREDICTED: uncharacterized protein LOC105339864 [CrassOstrea edulis gigas]
HavC	762121999	W.QGAQQGGQGGAQGGQGGAQG.G	Y	27.24	1697.75	20	1.3	849.882	2	34.84	3130000	1	7060	1	585	604			80.93	3	16400000	6	6	7	145227	PREDICTED: uncharacterized protein LOC105339864 [CrassOstrea edulis gigas]
HavC	762121999	G.QQGGAGGQGGAR(+39.99)GGQHGAQGGAQGGA.Q	Y	25.95	2215.98	26	-2.9	1108.99	2	29.59	608000	1	5909	1	682	707	Glyoxal-derived hydroimiadazolone	R12:Glyoxal-derived hydroimiadazolone:1000.00	80.93	3	16400000	6	6	7	145227	PREDICTED: uncharacterized protein LOC105339864 [CrassOstrea edulis gigas]
HavC	762121999	Q.GAQQGGQGGAQGGQGGAQG.G	Y	25.36	1569.69	19	3.3	785.854	2	35.59	163000	1	7225	1	586	604			80.93	3	16400000	6	6	7	145227	PREDICTED: uncharacterized protein LOC105339864 [CrassOstrea edulis gigas]
HavC	762121999	G.QQGGAGGQGGAR(+39.99)GGQHGAQGGAQG.G	Y	23.51	2087.92	24	1.1	1044.97	2	27.34	3640000	1	5415	1	682	705	Glyoxal-derived hydroimiadazolone	R12:Glyoxal-derived hydroimiadazolone:1000.00	80.93	3	16400000	6	6	7	145227	PREDICTED: uncharacterized protein LOC105339864 [CrassOstrea edulis gigas]
HavC	1242787169	L.NSAAAAAAAAASGR(+14.02)QG.L	Y	26.89	1357.67	16	3	679.844	2	60.5	0	2	12457	1	62	77	Methylation(KR)	R14:Methylation(KR):1000.00	75.32	20	780000	4	2	6	26862	antifreeze protein Maxi-like [CrassOstrea edulis virginica]
HavC	1242787169	N.AAAAAAAAAAS(-18.01)GSNGF.I	N	26.18	1259.59	16	-0.8	630.802	2	47.5	5060000	2	9692	3	247	262	Dehydration	S11:Dehydration:5.03	75.32	20	780000	4	2	6	26862	antifreeze protein Maxi-like [CrassOstrea edulis virginica]
HavC	1242787169	A.AAAAAAAAAS(-18.01)GSNGF.I	N	24.46	1188.55	15	-1.4	595.283	2	38.41	3530000	2	7711	1	248	262	Dehydration	S10:Dehydration:8.22	75.32	20	780000	4	2	6	26862	antifreeze protein Maxi-like [CrassOstrea edulis virginica]
HavC	1242787169	A.AAAAAAASQQS(+87.05)ATAAAAAAASRNA.A	Y	23.2	2130.06	24	-0.2	711.027	3	86.02	780000	1	18162	1	122	145	Phosphorylation to amine thiol	S11:Phosphorylation to amine thiol:5.08	75.32	20	780000	4	2	6	26862	antifreeze protein Maxi-like [CrassOstrea edulis virginica]
HavC	961089603	A.A(+43.01)AAAAAAAAAARI.K	Y	35.84	1111.61	13	1.4	556.813	2	90.7	6200000	2	19090	1	522	534	Carbamylation	A1:Carbamylation:1000.00	71.82	2	7410000	3	2	5	75858	PREDICTED: zinc finger protein 300-like [Octopus bimaculoides]
HavC	961089603	A.AAAAAAAAAAAAARI.K	Y	29.61	1210.68	15	1.5	606.347	2	74.14	1210000	2	15390	3	520	534			71.82	2	7410000	3	2	5	75858	PREDICTED: zinc finger protein 300-like [Octopus bimaculoides]
HavC	961089603	A.SAAAAAAAAAAAA.A	N	26.22	957.488	13	0.3	479.751	2	61.55	4840000	2	12681	1	518	530			71.82	2	7410000	3	2	5	75858	PREDICTED: zinc finger protein 300-like [Octopus bimaculoides]
HavC	1242795296	G.GGGGSGGSGGSGGSGGSGGSGGR(sub S)GGSGG.G	Y	25.77	1923.77	28	6.5	962.896	2	20.01	3040000	2	3786	1	50	77			61.86	10	14800000	4	4	4	29651	uncharacterized protein LOC111133694 [CrassOstrea edulis virginica]
HavC	1242795296	G.GGSGGSGGSGGSGGSGGSGGR(sub S)GGSGG.G	Y	25.61	1809.72	26	6.5	905.874	2	19.71	4820000	2	3721	1	52	77			61.86	10	14800000	4	4	4	29651	uncharacterized protein LOC111133694 [CrassOstrea edulis virginica]
HavC	1242795296	G.GGGSGGSGGSGGSGGSGGSGGSGGSGGGGR(sub A).G	Y	24.05	2067.82	30	5.6	1034.92	2	20.37	2190000	2	3863	1	51	80			61.86	10	14800000	4	4	4	29651	uncharacterized protein LOC111133694 [CrassOstrea edulis virginica]
HavC	1242795296	G.GGGSGGSGGSGGSGGSGGSGGSGGR(sub S)GG.G	Y	23.69	1866.74	27	8.9	934.387	2	19.84	4710000	2	3750	1	51	77			61.86	10	14800000	4	4	4	29651	uncharacterized protein LOC111133694 [CrassOstrea edulis virginica]
HavC	1227052548	R.DVVGSGVSAAISAR.G	Y	35.36	1287.68	14	0.7	644.847	2	71.88	3100000	2	14888	2	209	222			61.21	11	5160000	3	3	4	30230	nasilin 2 [Hyriopsis cumingii]
HavC	1227052548	R.QGTSVSSSGTGR.P	Y	27.09	1122.53	12	-1	562.27	2	17.55	0	1	3285	1	237	248			61.21	11	5160000	3	3	4	30230	nasilin 2 [Hyriopsis cumingii]
HavC	1227052548	R.GHAVSTPR.G	Y	22.72	823.43	8	-1.4	412.722	2	17.9	2060000	2	3337	1	77	84			61.21	11	5160000	3	3	4	30230	nasilin 2 [Hyriopsis cumingii]
HavC	729057562	R.DVVGSGVSAAISAR.G	Y	35.36	1287.68	14	0.7	644.847	2	71.88	3100000	2	14888	2	209	222			61.21	10	5160000	3	3	4	30895	silkmapin [Hyriopsis cumingii]
HavC	729057562	R.QGTSVSSSGTGR.P	Y	27.09	1122.53	12	-1	562.27	2	17.55	0	1	3285	1	237	248			61.21	10	5160000	3	3	4	30895	silkmapin [Hyriopsis cumingii]
HavC	729057562	R.GHAVSTPR.G	Y	22.72	823.43	8	-1.4	412.722	2	17.9	2060000	2	3337	1	77	84			61.21	10	5160000	3	3	4	30895	silkmapin [Hyriopsis cumingii]
HavC	1227052546	R.DVVGSGVSAAISAR.G	Y	35.36	1287.68	14	0.7	644.847	2	71.88	3100000	2	14888	2	209	222			61.21	11	5160000	3	3	4	29828	nasilin 1 [Hyriopsis cumingii]
HavC	1227052546	R.QGTSVSSSGTGR.P	Y	27.09	1122.53	12	-1	562.27	2	17.55	0	1	3285	1	237	248			61.21	11	5160000	3	3	4	29828	nasilin 1 [Hyriopsis cumingii]
HavC	1227052546	R.GHAVSTPR.G	Y	22.72	823.43	8	-1.4	412.722	2	17.9	2060000	2	3337	1	77	84			61.21	11	5160000	3	3	4	29828	nasilin 1 [Hyriopsis cumingii]
HavC	676482084	R.DAVTYTEHAK.R	Y	27.92	1133.54	10	-1	567.774	2	27.51	3870000	1	5452	1	69	78			56.33	15	8390000	3	3	3	23934	hypothetical protein LOTGIDRAFT_175997 [Lottia gigantea]
HavC	676482084	R.DNIQGITKPAIR.R	Y	25.26	1324.75	12	1.5	663.381	2	56.57	2040000	1	11800	1	25	36			56.33	15	8390000	3	3	3	23934	hypothetical protein LOTGIDRAFT_175997 [Lottia gigantea]
HavC	676482084	R.ISGLIYEETR.G	Y	24.22	1179.61	10	0.9	590.815	2	66.05	2480000	1	13846	1	47	56			56.33	15	8390000	3	3	3	23934	hypothetical protein LOTGIDRAFT_175997 [Lottia gigantea]
HavC	71532919	R.DAVTYTEHAK.R	Y	27.92	1133.54	10	-1	567.774	2	27.51	3870000	1	5452	1	61	70			52.89	39	8390000	3	3	3	9315	histone-4 partial [BathyModiolus modiolus thermophilus]
HavC	71532919	R.DNIQGITKPAIR.R	Y	25.26	1324.75	12	1.5	663.381	2	56.57	2040000	1	11800	1	17	28			52.89	39	8390000	3	3	3	9315	histone-4 partial [BathyModiolus modiolus thermophilus]
HavC	71532919	R.ISGLIYEETR.G	Y	24.22	1179.61	10	0.9	590.815	2	66.05	2480000	1	13846	1	39	48			52.89	39	8390000	3	3	3	9315	histone-4 partial [BathyModiolus modiolus thermophilus]
HavC	71532921	R.DAVTYTEHAK.R	Y	27.92	1133.54	10	-1	567.774	2	27.51	3870000	1	5452	1	61	70			52.89	39	8390000	3	3	3	9315	histone-4 partial [BathyModiolus modiolus azoricus]
HavC	71532921	R.DNIQGITKPAIR.R	Y	25.26	1324.75	12	1.5	663.381	2	56.57	2040000	1	11800	1	17	28			52.89	39	8390000	3	3	3	9315	histone-4 partial [BathyModiolus modiolus azoricus]
HavC	71532921	R.ISGLIYEETR.G	Y	24.22	1179.61	10	0.9	590.815	2	66.05	2480000	1	13846	1	39	48			52.89	39	8390000	3	3	3	9315	histone-4 partial [BathyModiolus modiolus azoricus]
HavC	507593324	R.DAVTYTEHAK.R	Y	27.92	1133.54	10	-1	567.774	2	27.51	3870000	1	5452	1	69	78			52.89	37	8390000	3	3	3	9599	histone H4 partial [Orcula dolium]
HavC	507593324	R.DNIQGITKPAIR.R	Y	25.26	1324.75	12	1.5	663.381	2	56.57	2040000	1	11800	1	25	36			52.89	37	8390000	3	3	3	9599	histone H4 partial [Orcula dolium]
HavC	507593324	R.ISGLIYEETR.G	Y	24.22	1179.61	10	0.9	590.815	2	66.05	2480000	1	13846	1	47	56			52.89	37	8390000	3	3	3	9599	histone H4 partial [Orcula dolium]
HavC	507593339	R.DAVTYTEHAK.R	Y	27.92	1133.54	10	-1	567.774	2	27.51	3870000	1	5452	1	69	78			52.89	37	8390000	3	3	3	9599	histone H4 partial [Orcula dolium]
HavC	507593339	R.DNIQGITKPAIR.R	Y	25.26	1324.75	12	1.5	663.381	2	56.57	2040000	1	11800	1	25	36			52.89	37	8390000	3	3	3	9599	histone H4 partial [Orcula dolium]
HavC	507593339	R.ISGLIYEETR.G	Y	24.22	1179.61	10	0.9	590.815	2	66.05	2480000	1	13846	1	47	56			52.89	37	8390000	3	3	3	9599	histone H4 partial [Orcula dolium]
HavC	507593342	R.DAVTYTEHAK.R	Y	27.92	1133.54	10	-1	567.774	2	27.51	3870000	1	5452	1	69	78			52.89	37	8390000	3	3	3	9599	histone H4 partial [Orcula dolium]
HavC	507593342	R.DNIQGITKPAIR.R	Y	25.26	1324.75	12	1.5	663.381	2	56.57	2040000	1	11800	1	25	36			52.89	37	8390000	3	3	3	9599	histone H4 partial [Orcula dolium]
HavC	507593342	R.ISGLIYEETR.G	Y	24.22	1179.61	10	0.9	590.815	2	66.05	2480000	1	13846	1	47	56			52.89	37	8390000	3	3	3	9599	histone H4 partial [Orcula dolium]
HavC	507593327	R.DAVTYTEHAK.R	Y	27.92	1133.54	10	-1	567.774	2	27.51	3870000	1	5452	1	69	78			52.89	37	8390000	3	3	3	9599	histone H4 partial [Orcula dolium]
HavC	507593327	R.DNIQGITKPAIR.R	Y	25.26	1324.75	12	1.5	663.381	2	56.57	2040000	1	11800	1	25	36			52.89	37	8390000	3	3	3	9599	histone H4 partial [Orcula dolium]
HavC	507593327	R.ISGLIYEETR.G	Y	24.22	1179.61	10	0.9	590.815	2	66.05	2480000	1	13846	1	47	56			52.89	37	8390000	3	3	3	9599	histone H4 partial [Orcula dolium]
HavC	507593345	R.DAVTYTEHAK.R	Y	27.92	1133.54	10	-1	567.774	2	27.51	3870000	1	5452	1	69	78			52.89	37	8390000	3	3	3	9599	histone H4 partial [Orcula dolium]
HavC	507593345	R.DNIQGITKPAIR.R	Y	25.26	1324.75	12	1.5	663.381	2	56.57	2040000	1	11800	1	25	36			52.89	37	8390000	3	3	3	9599	histone H4 partial [Orcula dolium]
HavC	507593345	R.ISGLIYEETR.G	Y	24.22	1179.61	10	0.9	590.815	2	66.05	2480000	1	13846	1	47	56			52.89	37	8390000	3	3	3	9599	histone H4 partial [Orcula dolium]
HavC	507593330	R.DAVTYTEHAK.R	Y	27.92	1133.54	10	-1	567.774	2	27.51	3870000	1	5452	1	69	78			52.89	37	8390000	3	3	3	9599	histone H4 partial [Orcula dolium]
HavC	507593330	R.DNIQGITKPAIR.R	Y	25.26	1324.75	12	1.5	663.381	2	56.57	2040000	1	11800	1	25	36			52.89	37	8390000	3	3	3	9599	histone H4 partial [Orcula dolium]
HavC	507593330	R.ISGLIYEETR.G	Y	24.22	1179.61	10	0.9	590.815	2	66.05	2480000	1	13846	1	47	56			52.89	37	8390000	3	3	3	9599	histone H4 partial [Orcula dolium]
HavC	507593333	R.DAVTYTEHAK.R	Y	27.92	1133.54	10	-1	567.774	2	27.51	3870000	1	5452	1	69	78			52.89	37	8390000	3	3	3	9599	histone H4 partial [Orcula dolium]
HavC	507593333	R.DNIQGITKPAIR.R	Y	25.26	1324.75	12	1.5	663.381	2	56.57	2040000	1	11800	1	25	36			52.89	37	8390000	3	3	3	9599	histone H4 partial [Orcula dolium]
HavC	507593333	R.ISGLIYEETR.G	Y	24.22	1179.61	10	0.9	590.815	2	66.05	2480000	1	13846	1	47	56			52.89	37	8390000	3	3	3	9599	histone H4 partial [Orcula dolium]
HavC	507593348	R.DAVTYTEHAK.R	Y	27.92	1133.54	10	-1	567.774	2	27.51	3870000	1	5452	1	69	78			52.89	37	8390000	3	3	3	9599	histone H4 partial [Orcula dolium]
HavC	507593348	R.DNIQGITKPAIR.R	Y	25.26	1324.75	12	1.5	663.381	2	56.57	2040000	1	11800	1	25	36			52.89	37	8390000	3	3	3	9599	histone H4 partial [Orcula dolium]
HavC	507593348	R.ISGLIYEETR.G	Y	24.22	1179.61	10	0.9	590.815	2	66.05	2480000	1	13846	1	47	56			52.89	37	8390000	3	3	3	9599	histone H4 partial [Orcula dolium]
HavC	507593336	R.DAVTYTEHAK.R	Y	27.92	1133.54	10	-1	567.774	2	27.51	3870000	1	5452	1	69	78			52.89	37	8390000	3	3	3	9599	histone H4 partial [Orcula dolium]
HavC	507593336	R.DNIQGITKPAIR.R	Y	25.26	1324.75	12	1.5	663.381	2	56.57	2040000	1	11800	1	25	36			52.89	37	8390000	3	3	3	9599	histone H4 partial [Orcula dolium]
HavC	507593336	R.ISGLIYEETR.G	Y	24.22	1179.61	10	0.9	590.815	2	66.05	2480000	1	13846	1	47	56			52.89	37	8390000	3	3	3	9599	histone H4 partial [Orcula dolium]
HavC	89520691	R.DAVTYTEHAK.R	Y	27.92	1133.54	10	-1	567.774	2	27.51	3870000	1	5452	1	69	78			52.89	31	8390000	3	3	3	11367	histone H4 [Azumapecten farreri]
HavC	89520691	R.DNIQGITKPAIR.R	Y	25.26	1324.75	12	1.5	663.381	2	56.57	2040000	1	11800	1	25	36			52.89	31	8390000	3	3	3	11367	histone H4 [Azumapecten farreri]
HavC	89520691	R.ISGLIYEETR.G	Y	24.22	1179.61	10	0.9	590.815	2	66.05	2480000	1	13846	1	47	56			52.89	31	8390000	3	3	3	11367	histone H4 [Azumapecten farreri]
HavC	157169165	R.DAVTYTEHAK.R	Y	27.92	1133.54	10	-1	567.774	2	27.51	3870000	1	5452	1	69	78			52.89	31	8390000	3	3	3	11367	histone H4 [Venerupis corrugata]
HavC	157169165	R.DNIQGITKPAIR.R	Y	25.26	1324.75	12	1.5	663.381	2	56.57	2040000	1	11800	1	25	36			52.89	31	8390000	3	3	3	11367	histone H4 [Venerupis corrugata]
HavC	157169165	R.ISGLIYEETR.G	Y	24.22	1179.61	10	0.9	590.815	2	66.05	2480000	1	13846	1	47	56			52.89	31	8390000	3	3	3	11367	histone H4 [Venerupis corrugata]
HavC	23304760	R.DAVTYTEHAK.R	Y	27.92	1133.54	10	-1	567.774	2	27.51	3870000	1	5452	1	69	78			52.89	31	8390000	3	3	3	11367	histone H4 [Mytilus edulis]
HavC	23304760	R.DNIQGITKPAIR.R	Y	25.26	1324.75	12	1.5	663.381	2	56.57	2040000	1	11800	1	25	36			52.89	31	8390000	3	3	3	11367	histone H4 [Mytilus edulis]
HavC	23304760	R.ISGLIYEETR.G	Y	24.22	1179.61	10	0.9	590.815	2	66.05	2480000	1	13846	1	47	56			52.89	31	8390000	3	3	3	11367	histone H4 [Mytilus edulis]
HavC	33114104	R.DAVTYTEHAK.R	Y	27.92	1133.54	10	-1	567.774	2	27.51	3870000	1	5452	1	69	78			52.89	31	8390000	3	3	3	11395	histone H4 [Mytilus chilensis]
HavC	33114104	R.DNIQGITKPAIR.R	Y	25.26	1324.75	12	1.5	663.381	2	56.57	2040000	1	11800	1	25	36			52.89	31	8390000	3	3	3	11395	histone H4 [Mytilus chilensis]
HavC	33114104	R.ISGLIYEETR.G	Y	24.22	1179.61	10	0.9	590.815	2	66.05	2480000	1	13846	1	47	56			52.89	31	8390000	3	3	3	11395	histone H4 [Mytilus chilensis]
HavC	33114108	R.DAVTYTEHAK.R	Y	27.92	1133.54	10	-1	567.774	2	27.51	3870000	1	5452	1	69	78			52.89	31	8390000	3	3	3	11367	histone H4 [Mytilus trossulus]
HavC	33114108	R.DNIQGITKPAIR.R	Y	25.26	1324.75	12	1.5	663.381	2	56.57	2040000	1	11800	1	25	36			52.89	31	8390000	3	3	3	11367	histone H4 [Mytilus trossulus]
HavC	33114108	R.ISGLIYEETR.G	Y	24.22	1179.61	10	0.9	590.815	2	66.05	2480000	1	13846	1	47	56			52.89	31	8390000	3	3	3	11367	histone H4 [Mytilus trossulus]
HavC	157169155	R.DAVTYTEHAK.R	Y	27.92	1133.54	10	-1	567.774	2	27.51	3870000	1	5452	1	69	78			52.89	31	8390000	3	3	3	11367	histone H4 [Ruditapes decussatus]
HavC	157169155	R.DNIQGITKPAIR.R	Y	25.26	1324.75	12	1.5	663.381	2	56.57	2040000	1	11800	1	25	36			52.89	31	8390000	3	3	3	11367	histone H4 [Ruditapes decussatus]
HavC	157169155	R.ISGLIYEETR.G	Y	24.22	1179.61	10	0.9	590.815	2	66.05	2480000	1	13846	1	47	56			52.89	31	8390000	3	3	3	11367	histone H4 [Ruditapes decussatus]
HavC	33114106	R.DAVTYTEHAK.R	Y	27.92	1133.54	10	-1	567.774	2	27.51	3870000	1	5452	1	69	78			52.89	31	8390000	3	3	3	11367	histone H4 [Mytilus californianus]
HavC	33114106	R.DNIQGITKPAIR.R	Y	25.26	1324.75	12	1.5	663.381	2	56.57	2040000	1	11800	1	25	36			52.89	31	8390000	3	3	3	11367	histone H4 [Mytilus californianus]
HavC	33114106	R.ISGLIYEETR.G	Y	24.22	1179.61	10	0.9	590.815	2	66.05	2480000	1	13846	1	47	56			52.89	31	8390000	3	3	3	11367	histone H4 [Mytilus californianus]
HavC	676482091	R.DAVTYTEHAK.R	Y	27.92	1133.54	10	-1	567.774	2	27.51	3870000	1	5452	1	69	78			52.89	31	8390000	3	3	3	11367	hypothetical protein LOTGIDRAFT_146028 [Lottia gigantea]
HavC	676482091	R.DNIQGITKPAIR.R	Y	25.26	1324.75	12	1.5	663.381	2	56.57	2040000	1	11800	1	25	36			52.89	31	8390000	3	3	3	11367	hypothetical protein LOTGIDRAFT_146028 [Lottia gigantea]
HavC	676482091	R.ISGLIYEETR.G	Y	24.22	1179.61	10	0.9	590.815	2	66.05	2480000	1	13846	1	47	56			52.89	31	8390000	3	3	3	11367	hypothetical protein LOTGIDRAFT_146028 [Lottia gigantea]
HavC	23304755	R.DAVTYTEHAK.R	Y	27.92	1133.54	10	-1	567.774	2	27.51	3870000	1	5452	1	69	78			52.89	31	8390000	3	3	3	11367	histone H4 [Mytilus edulis]
HavC	23304755	R.DNIQGITKPAIR.R	Y	25.26	1324.75	12	1.5	663.381	2	56.57	2040000	1	11800	1	25	36			52.89	31	8390000	3	3	3	11367	histone H4 [Mytilus edulis]
HavC	23304755	R.ISGLIYEETR.G	Y	24.22	1179.61	10	0.9	590.815	2	66.05	2480000	1	13846	1	47	56			52.89	31	8390000	3	3	3	11367	histone H4 [Mytilus edulis]
HavC	21307833	R.DAVTYTEHAK.C	Y	27.92	1133.54	10	-1	567.774	2	27.51	3870000	1	5452	1	69	78			52.89	31	8390000	3	3	3	11314	histone H4 [Aplysia californica]
HavC	21307833	R.DNIQGITKPAIR.R	Y	25.26	1324.75	12	1.5	663.381	2	56.57	2040000	1	11800	1	25	36			52.89	31	8390000	3	3	3	11314	histone H4 [Aplysia californica]
HavC	21307833	R.ISGLIYEETR.G	Y	24.22	1179.61	10	0.9	590.815	2	66.05	2480000	1	13846	1	47	56			52.89	31	8390000	3	3	3	11314	histone H4 [Aplysia californica]
HavC	157169145	R.DAVTYTEHAK.R	Y	27.92	1133.54	10	-1	567.774	2	27.51	3870000	1	5452	1	69	78			52.89	31	8390000	3	3	3	11393	histone H4 [Ruditapes philippinarum]
HavC	157169145	R.DNIQGITKPAIR.R	Y	25.26	1324.75	12	1.5	663.381	2	56.57	2040000	1	11800	1	25	36			52.89	31	8390000	3	3	3	11393	histone H4 [Ruditapes philippinarum]
HavC	157169145	R.ISGLIYEETR.G	Y	24.22	1179.61	10	0.9	590.815	2	66.05	2480000	1	13846	1	47	56			52.89	31	8390000	3	3	3	11393	histone H4 [Ruditapes philippinarum]
HavC	33114054	R.DAVTYTEHAK.R	Y	27.92	1133.54	10	-1	567.774	2	27.51	3870000	1	5452	1	69	78			52.89	31	8390000	3	3	3	11367	histone H4 [Mytilus galloprovincialis]
HavC	33114054	R.DNIQGITKPAIR.R	Y	25.26	1324.75	12	1.5	663.381	2	56.57	2040000	1	11800	1	25	36			52.89	31	8390000	3	3	3	11367	histone H4 [Mytilus galloprovincialis]
HavC	33114054	R.ISGLIYEETR.G	Y	24.22	1179.61	10	0.9	590.815	2	66.05	2480000	1	13846	1	47	56			52.89	31	8390000	3	3	3	11367	histone H4 [Mytilus galloprovincialis]
HavC	33114110	R.DAVTYTEHAK.R	Y	27.92	1133.54	10	-1	567.774	2	27.51	3870000	1	5452	1	69	78			52.89	31	8390000	3	3	3	11367	histone H4 [Mytilus edulis]
HavC	33114110	R.DNIQGITKPAIR.R	Y	25.26	1324.75	12	1.5	663.381	2	56.57	2040000	1	11800	1	25	36			52.89	31	8390000	3	3	3	11367	histone H4 [Mytilus edulis]
HavC	33114110	R.ISGLIYEETR.G	Y	24.22	1179.61	10	0.9	590.815	2	66.05	2480000	1	13846	1	47	56			52.89	31	8390000	3	3	3	11367	histone H4 [Mytilus edulis]
HavC	344179094	R.DAVTYTEHAK.R	Y	27.92	1133.54	10	-1	567.774	2	27.51	3870000	1	5452	1	69	78			52.89	31	8390000	3	3	3	11367	histone H4 [Ambigolimax valentianus]
HavC	344179094	R.DNIQGITKPAIR.R	Y	25.26	1324.75	12	1.5	663.381	2	56.57	2040000	1	11800	1	25	36			52.89	31	8390000	3	3	3	11367	histone H4 [Ambigolimax valentianus]
HavC	344179094	R.ISGLIYEETR.G	Y	24.22	1179.61	10	0.9	590.815	2	66.05	2480000	1	13846	1	47	56			52.89	31	8390000	3	3	3	11367	histone H4 [Ambigolimax valentianus]
HavC	298567956	R.DAVTYTEHAK.R	Y	27.92	1133.54	10	-1	567.774	2	27.51	3870000	1	5452	1	69	78			52.89	31	8390000	3	3	3	11367	histone H4 [CrassOstrea edulis virginica]
HavC	298567956	R.DNIQGITKPAIR.R	Y	25.26	1324.75	12	1.5	663.381	2	56.57	2040000	1	11800	1	25	36			52.89	31	8390000	3	3	3	11367	histone H4 [CrassOstrea edulis virginica]
HavC	298567956	R.ISGLIYEETR.G	Y	24.22	1179.61	10	0.9	590.815	2	66.05	2480000	1	13846	1	47	56			52.89	31	8390000	3	3	3	11367	histone H4 [CrassOstrea edulis virginica]
HavC	71726735	R.DAVTYTEHAK.R	Y	27.92	1133.54	10	-1	567.774	2	27.51	3870000	1	5452	1	69	78			52.89	31	8390000	3	3	3	11367	histone H4 [Biomphalaria glabrata]
HavC	71726735	R.DNIQGITKPAIR.R	Y	25.26	1324.75	12	1.5	663.381	2	56.57	2040000	1	11800	1	25	36			52.89	31	8390000	3	3	3	11367	histone H4 [Biomphalaria glabrata]
HavC	71726735	R.ISGLIYEETR.G	Y	24.22	1179.61	10	0.9	590.815	2	66.05	2480000	1	13846	1	47	56			52.89	31	8390000	3	3	3	11367	histone H4 [Biomphalaria glabrata]
HavC	33114102	R.DAVTYTEHAK.R	Y	27.92	1133.54	10	-1	567.774	2	27.51	3870000	1	5452	1	69	78			52.89	31	8390000	3	3	3	11367	histone H4 [Mytilus galloprovincialis]
HavC	33114102	R.DNIQGITKPAIR.R	Y	25.26	1324.75	12	1.5	663.381	2	56.57	2040000	1	11800	1	25	36			52.89	31	8390000	3	3	3	11367	histone H4 [Mytilus galloprovincialis]
HavC	33114102	R.ISGLIYEETR.G	Y	24.22	1179.61	10	0.9	590.815	2	66.05	2480000	1	13846	1	47	56			52.89	31	8390000	3	3	3	11367	histone H4 [Mytilus galloprovincialis]
HavC	23304765	R.DAVTYTEHAK.R	Y	27.92	1133.54	10	-1	567.774	2	27.51	3870000	1	5452	1	69	78			52.89	31	8390000	3	3	3	11367	histone H4 [Mytilus edulis]
HavC	23304765	R.DNIQGITKPAIR.R	Y	25.26	1324.75	12	1.5	663.381	2	56.57	2040000	1	11800	1	25	36			52.89	31	8390000	3	3	3	11367	histone H4 [Mytilus edulis]
HavC	23304765	R.ISGLIYEETR.G	Y	24.22	1179.61	10	0.9	590.815	2	66.05	2480000	1	13846	1	47	56			52.89	31	8390000	3	3	3	11367	histone H4 [Mytilus edulis]
HavC	158997665	R.DAVTYTEHAK.C	Y	27.92	1133.54	10	-1	567.774	2	27.51	3870000	1	5452	1	69	78			52.89	31	8390000	3	3	3	11314	histone 4 [Aplysia californica]
HavC	158997665	R.DNIQGITKPAIR.R	Y	25.26	1324.75	12	1.5	663.381	2	56.57	2040000	1	11800	1	25	36			52.89	31	8390000	3	3	3	11314	histone 4 [Aplysia californica]
HavC	158997665	R.ISGLIYEETR.G	Y	24.22	1179.61	10	0.9	590.815	2	66.05	2480000	1	13846	1	47	56			52.89	31	8390000	3	3	3	11314	histone 4 [Aplysia californica]
HavC	255032110	R.DAVTYTEHAK.R	Y	27.92	1133.54	10	-1	567.774	2	27.51	3870000	1	5452	1	69	78			52.89	31	8390000	3	3	3	11441	histone H4 [Solen marginatus]
HavC	255032110	R.DNIQGITKPAIR.R	Y	25.26	1324.75	12	1.5	663.381	2	56.57	2040000	1	11800	1	25	36			52.89	31	8390000	3	3	3	11441	histone H4 [Solen marginatus]
HavC	255032110	R.ISGLIYEETR.G	Y	24.22	1179.61	10	0.9	590.815	2	66.05	2480000	1	13846	1	47	56			52.89	31	8390000	3	3	3	11441	histone H4 [Solen marginatus]
HavC	1178763430	K.FDFM(+15.99)YQ(+.98)SIDK.L	Y	31.3	1309.55	10	0.8	655.785	2	75.54	5930000	1	15891	1	521	530	Oxidation (M); Deamidation (NQ)	M4:Oxidation (M):1000.00;Q6:Deamidation (NQ):1000.00	49.55	3	14600000	2	2	4	54292	nacreous layer matrix protein Hic52 [Hyriopsis cumingii]
HavC	1178763430	K.FDFM(+15.99)YQSIDK.L	Y	28.09	1308.57	10	1.7	655.293	2	73.51	3080000	1	15451	1	521	530	Oxidation (M)	M4:Oxidation (M):1000.00	49.55	3	14600000	2	2	4	54292	nacreous layer matrix protein Hic52 [Hyriopsis cumingii]
HavC	1178763430	G.GPAQ(+.98)SPPK.K	Y	24.69	781.397	8	-1.1	391.705	2	20.51	5150000	2	3891	1	326	333	Deamidation (NQ)	Q4:Deamidation (NQ):1000.00	49.55	3	14600000	2	2	4	54292	nacreous layer matrix protein Hic52 [Hyriopsis cumingii]
HavC	1178763430	K.FDFMYQ(+.98)SIDK.L	Y	24.54	1293.56	10	-2.5	647.785	2	81.81	469000	1	17249	1	521	530	Deamidation (NQ)	Q6:Deamidation (NQ):1000.00	49.55	3	14600000	2	2	4	54292	nacreous layer matrix protein Hic52 [Hyriopsis cumingii]
HavC	676489774	R.KLEDDEKV.E	Y	26.14	974.492	8	-0.3	488.253	2	28.22	109000000	2	5525	4	264	271			45.86	4	509000000	3	3	7	31811	hypothetical protein LOTGIDRAFT_107918 [Lottia gigantea]
HavC	676489774	E.KQ(sub R)KLEDDEKV.E	Y	24.14	1230.65	10	0	616.33	2	22.93	337000000	2	4405	2	262	271			45.86	4	509000000	3	3	7	31811	hypothetical protein LOTGIDRAFT_107918 [Lottia gigantea]
HavC	676489774	E.KE(sub R)KLEDDEKV.E	Y	22.92	1231.63	10	0.7	616.822	2	24.42	62700000	2	4722	1	262	271			45.86	4	509000000	3	3	7	31811	hypothetical protein LOTGIDRAFT_107918 [Lottia gigantea]
HavC	556095266	R.KLEDDEKV.E	Y	26.14	974.492	8	-0.3	488.253	2	28.22	109000000	2	5525	4	264	271			45.86	4	509000000	3	3	7	31811	hypothetical protein LOTGIDRAFT_107918 [Lottia gigantea]
HavC	556095266	E.KQ(sub R)KLEDDEKV.E	Y	24.14	1230.65	10	0	616.33	2	22.93	337000000	2	4405	2	262	271			45.86	4	509000000	3	3	7	31811	hypothetical protein LOTGIDRAFT_107918 [Lottia gigantea]
HavC	556095266	E.KE(sub R)KLEDDEKV.E	Y	22.92	1231.63	10	0.7	616.822	2	24.42	62700000	2	4722	1	262	271			45.86	4	509000000	3	3	7	31811	hypothetical protein LOTGIDRAFT_107918 [Lottia gigantea]
HorA	1207965069	G.FAQGGK(+42.02)DSC(+57.02)QGDSGGPL.V	Y	45.34	1721.74	17	1.2	861.88	2	47.87	806000	2	9843	1	517	533	Guanidination; Carbamidomethylation	K6:Guanidination:1000.00;C9:Carbamidomethylation:1000.00	117.04	6	78300000	8	4	15	62647	transmembrane protease serine 9-like [Mizuhopecten yessoensis]
HorA	1207965069	C.AGFAQGGK(+42.02)DSC(+57.02)QGDSGGPL.V	Y	43.17	1849.8	19	1.9	925.91	2	63.28	488000	2	13161	1	515	533	Guanidination; Carbamidomethylation	K8:Guanidination:1000.00;C11:Carbamidomethylation:1000.00	117.04	6	78300000	8	4	15	62647	transmembrane protease serine 9-like [Mizuhopecten yessoensis]
HorA	1207965069	G.GK(+31.99)DSC(+57.02)QGDSGGPL.V	N	39.42	1308.53	13	-1.4	655.269	2	36.03	26800000	2	7276	1	521	533	Dihydroxy; Carbamidomethylation	K2:Dihydroxy:96.11;C5:Carbamidomethylation:1000.00	117.04	6	78300000	8	4	15	62647	transmembrane protease serine 9-like [Mizuhopecten yessoensis]
HorA	1207965069	G.FAQGGK(+114.04)DSC(+57.02)QGDSGGPL.V	Y	38.17	1793.76	17	0.1	897.889	2	62.55	551000	2	13001	1	517	533	Ubiquitin; Carbamidomethylation	K6:Ubiquitin:0.00;C9:Carbamidomethylation:1000.00	117.04	6	78300000	8	4	15	62647	transmembrane protease serine 9-like [Mizuhopecten yessoensis]
HorA	1207965069	D.S(+42.01)(+79.97)C(+57.02)QGDSGGPL.V	N	35.23	1098.37	10	7.9	550.196	2	58.49	7540000	2	12123	2	524	533	Acetylation (N-term); Phosphorylation (STY); Carbamidomethylation	S1:Acetylation (N-term):1000.00;S1:Phosphorylation (STY):43.82;C2:Carbamidomethylation:1000.00	117.04	6	78300000	8	4	15	62647	transmembrane protease serine 9-like [Mizuhopecten yessoensis]
HorA	1207965069	R.KDS(+86.00)C(+57.02)TGDSGGPL.V	Y	31.78	1278.5	12	3	640.261	2	37.74	0	1	7610	2	216	227	Malonylation; Carbamidomethylation	S3:Malonylation:45.16;C4:Carbamidomethylation:1000.00	117.04	6	78300000	8	4	15	62647	transmembrane protease serine 9-like [Mizuhopecten yessoensis]
HorA	1207965069	Q.GGKD(+31.97)SC(+57.02)QGDSGGPL.V	N	30.61	1365.53	14	-1.2	683.771	2	53.61	3490000	2	11077	1	520	533	Persulfide; Carbamidomethylation	D4:Persulfide:47.64;C6:Carbamidomethylation:1000.00	117.04	6	78300000	8	4	15	62647	transmembrane protease serine 9-like [Mizuhopecten yessoensis]
HorA	1207965069	E.NGRKD(+17.03)SC(+57.02)TGDSGGPL.V	Y	29.04	1536.7	15	0.5	769.355	2	57.74	0	2	11961	1	213	227	Replacement of proton with ammonium ion; Carbamidomethylation	D5:Replacement of proton with ammonium ion:20.54;C7:Carbamidomethylation:1000.00	117.04	6	78300000	8	4	15	62647	transmembrane protease serine 9-like [Mizuhopecten yessoensis]
HorA	1207965069	A.QGGKDS(+162.05)C(+57.02)QGDSGGPL.V	N	27.1	1623.67	15	0.2	812.842	2	44.36	613000	2	9080	3	519	533	Hexose (NSY); Carbamidomethylation	S6:Hexose (NSY):68.60;C7:Carbamidomethylation:1000.00	117.04	6	78300000	8	4	15	62647	transmembrane protease serine 9-like [Mizuhopecten yessoensis]
HorA	1207965069	G.FAQGGKD(+356.19)SC(+57.02)QGDSGGPL.V	Y	26.5	2035.91	17	2.6	679.645	3	50.54	76500000	2	10415	2	517	533	Biotin polyethyleneoxide amine; Carbamidomethylation	D7:Biotin polyethyleneoxide amine:14.62;C9:Carbamidomethylation:1000.00	117.04	6	78300000	8	4	15	62647	transmembrane protease serine 9-like [Mizuhopecten yessoensis]
HorA	405958293	D.KN(+.98)Q(+.98)FN(+.98)VDGQGDSGGPL.V	Y	41.08	1634.71	16	3.2	818.363	2	55.21	8460000	2	11415	2	3402	3417	Deamidation (NQ)	N2:Deamidation (NQ):21.15;Q3:Deamidation (NQ):16.36;N5:Deamidation (NQ):19.86	112.96	2	273000000	9	9	17	395172	hypothetical protein CGI_10016401 [CrassOstrea edulis gigas]
HorA	405958293	F.N(+42.01)(+.98)VDGQGDSGGPL.V	Y	39.5	1157.48	12	-0.2	579.749	2	37.39	6390000	2	7569	1	3406	3417	Acetylation (N-term); Deamidation (NQ)	N1:Acetylation (N-term):1000.00;N1:Deamidation (NQ):8.26	112.96	2	273000000	9	9	17	395172	hypothetical protein CGI_10016401 [CrassOstrea edulis gigas]
HorA	405958293	V.R(+28.03)MGNVDKNQFNVDGQGDSGGPL.V	Y	37.18	2332.09	22	3.9	778.373	3	46.77	2130000	2	9605	1	3396	3417	Dimethylation(KR)	R1:Dimethylation(KR):0.00	112.96	2	273000000	9	9	17	395172	hypothetical protein CGI_10016401 [CrassOstrea edulis gigas]
HorA	405958293	N.VDKNQF(+31.99)NVDGQGDSGGPL.V	Y	33.48	1877.84	18	3.5	626.956	3	48.95	0	2	10078	1	3400	3417	Dihydroxy	F6:Dihydroxy:14.84	112.96	2	273000000	9	9	17	395172	hypothetical protein CGI_10016401 [CrassOstrea edulis gigas]
HorA	405958293	N.VDK(+31.99)NQFNVDGQGDSGGPL.V	Y	32	1877.84	18	0.6	626.954	3	48.41	76200000	2	9959	3	3400	3417	Dihydroxy	K3:Dihydroxy:12.33	112.96	2	273000000	9	9	17	395172	hypothetical protein CGI_10016401 [CrassOstrea edulis gigas]
HorA	405958293	N.G(+42.01)GHSVQVN.Y	Y	30.96	838.393	8	-0.3	420.204	2	20.31	3080000	2	3880	1	1091	1098	Acetylation (N-term)	G1:Acetylation (N-term):1000.00	112.96	2	273000000	9	9	17	395172	hypothetical protein CGI_10016401 [CrassOstrea edulis gigas]
HorA	405958293	F.NVD(-15.99)GQGDSGGPL.V	Y	29.47	1098.49	12	9.3	550.26	2	31.44	128000000	2	6283	1	3406	3417	Deoxy	D3:Deoxy:31.27	112.96	2	273000000	9	9	17	395172	hypothetical protein CGI_10016401 [CrassOstrea edulis gigas]
HorA	405958293	K.NQF(+31.99)NVDGQGDSGGPL.V	Y	27.83	1535.65	15	-1.8	768.83	2	37.17	7420000	2	7522	2	3403	3417	Dihydroxy	F3:Dihydroxy:95.19	112.96	2	273000000	9	9	17	395172	hypothetical protein CGI_10016401 [CrassOstrea edulis gigas]
HorA	405958293	R.NGNLSQ(+.98)VS(+79.97)V.P	Y	26.66	997.412	9	-1.8	499.712	2	44.37	0	2	9083	1	2752	2760	Deamidation (NQ); Phosphorylation (STY)	Q6:Deamidation (NQ):13.38;S8:Phosphorylation (STY):19.27	112.96	2	273000000	9	9	17	395172	hypothetical protein CGI_10016401 [CrassOstrea edulis gigas]
HorA	405958293	V.DK(+44.03)NQFNVDGQGDSGGPL.V	Y	26.42	1790.81	17	2.9	597.945	3	48.41	5350000	2	9957	1	3401	3417	Ethanolation (KR)	K2:Ethanolation (KR):1000.00	112.96	2	273000000	9	9	17	395172	hypothetical protein CGI_10016401 [CrassOstrea edulis gigas]
HorA	405958293	V.DK(+31.99)NQFNVDGQGDSGGPL.V	Y	25.49	1778.77	17	4.6	593.933	3	28.23	20500000	2	5586	1	3401	3417	Dihydroxy	K2:Dihydroxy:4.05	112.96	2	273000000	9	9	17	395172	hypothetical protein CGI_10016401 [CrassOstrea edulis gigas]
HorA	405958293	F.N(+41.03)VDGQGDSGGPL.V	Y	25.49	1155.52	12	9.5	578.771	2	32.19	14800000	2	6443	1	3406	3417	Amidination of lysines or N-terminal amines with methyl acetimidate	N1:Amidination of lysines or N-terminal amines with methyl acetimidate:1000.00	112.96	2	273000000	9	9	17	395172	hypothetical protein CGI_10016401 [CrassOstrea edulis gigas]
HorA	405958293	L.I(+42.01)EATAGSSLTGDIAI.D	Y	24.71	1459.74	15	-2.6	730.876	2	58.93	648000	2	12217	1	134	148	Acetylation (N-term)	I1:Acetylation (N-term):1000.00	112.96	2	273000000	9	9	17	395172	hypothetical protein CGI_10016401 [CrassOstrea edulis gigas]
HorA	476538091	G.QLTENGKTTC(+57.02)QGDSGGPLM(+6.01).C	Y	46.41	1998.9	19	1.5	667.307	3	23.3	37400000	2	4523	2	194	212	Carbamidomethylation; Replacement of proton by lithium	C10:Carbamidomethylation:1000.00;M19:Replacement of proton by lithium:113.99	112.31	11	172000000	7	7	19	27055	SP1-Sep-3 [Sepia latimanus]
HorA	476538091	A.GQLTENGKTTC(+57.02)QGDSGGPLM(+6.01).C	Y	39.19	2055.92	20	3.1	686.315	3	23.35	6810000	1	4524	1	193	212	Carbamidomethylation; Replacement of proton by lithium	C11:Carbamidomethylation:1000.00;M20:Replacement of proton by lithium:151.86	112.31	11	172000000	7	7	19	27055	SP1-Sep-3 [Sepia latimanus]
HorA	476538091	L.TENGK(+28.03)TTC(+57.02)QGDSGGPL.M	Y	38.68	1648.74	16	-2.8	825.373	2	54.68	19300000	1	11227	3	196	211	Dimethylation(KR); Carbamidomethylation	K5:Dimethylation(KR):1000.00;C8:Carbamidomethylation:1000.00	112.31	11	172000000	7	7	19	27055	SP1-Sep-3 [Sepia latimanus]
HorA	476538091	A.G(+42.01)QLTENGKTTC(+57.02)QGDSGGPL.M	Y	37.43	1960.88	19	2.3	654.635	3	58.33	2740000	1	12004	2	193	211	Acetylation (N-term); Carbamidomethylation	G1:Acetylation (N-term):1000.00;C11:Carbamidomethylation:1000.00	112.31	11	172000000	7	7	19	27055	SP1-Sep-3 [Sepia latimanus]
HorA	476538091	A.GQLTENGKTTC(+57.02)QGDSGGPL.M	Y	32.38	1918.87	19	-3.1	960.439	2	32	5960000	2	6404	1	193	211	Carbamidomethylation	C11:Carbamidomethylation:1000.00	112.31	11	172000000	7	7	19	27055	SP1-Sep-3 [Sepia latimanus]
HorA	476538091	Q.LTEN(+.98)GKTTC(+57.02)Q(+.98)GDSGGPL.M	Y	31.95	1735.76	17	0.3	868.886	2	55.43	47300000	2	11463	1	195	211	Deamidation (NQ); Carbamidomethylation	N4:Deamidation (NQ):1000.00;C9:Carbamidomethylation:1000.00;Q10:Deamidation (NQ):1000.00	112.31	11	172000000	7	7	19	27055	SP1-Sep-3 [Sepia latimanus]
HorA	476538091	G.QLTENGKTTC(+57.02)QGDSGGPL.M	Y	31.08	1861.85	18	-5.2	931.926	2	31.46	14700000	2	6288	1	194	211	Carbamidomethylation	C10:Carbamidomethylation:1000.00	112.31	11	172000000	7	7	19	27055	SP1-Sep-3 [Sepia latimanus]
HorA	476538091	A.GQLTEN(+30.01)GKTTC(+57.02)QGDSGGPL.M	Y	30.01	1948.88	19	1.9	650.635	3	50.15	5870000	2	10332	1	193	211	Hydroxymethyl; Carbamidomethylation	N6:Hydroxymethyl:1000.00;C11:Carbamidomethylation:1000.00	112.31	11	172000000	7	7	19	27055	SP1-Sep-3 [Sepia latimanus]
HorA	476538091	Q.LTENGK(+397.24)TTC(+57.02)QGDSGGPL.M	Y	28.12	2131.03	17	-2.6	711.35	3	41.83	20000000	2	8533	2	195	211	LeumethylArgGlyGly; Carbamidomethylation	K6:LeumethylArgGlyGly:1000.00;C9:Carbamidomethylation:1000.00	112.31	11	172000000	7	7	19	27055	SP1-Sep-3 [Sepia latimanus]
HorA	476538091	L.TENGK(+14.02)TTC(+57.02)QGDSGGPL.M	Y	27.89	1634.72	16	-3.2	818.365	2	55.79	9560000	2	11538	2	196	211	Methylation(KR); Carbamidomethylation	K5:Methylation(KR):1000.00;C8:Carbamidomethylation:1000.00	112.31	11	172000000	7	7	19	27055	SP1-Sep-3 [Sepia latimanus]
HorA	476538091	G.QLTEN(+30.01)GKTTC(+57.02)QGDSGGPL.M	Y	26.09	1891.86	18	2.1	631.628	3	49.4	0	2	10174	1	194	211	Hydroxymethyl; Carbamidomethylation	N5:Hydroxymethyl:1000.00;C10:Carbamidomethylation:1000.00	112.31	11	172000000	7	7	19	27055	SP1-Sep-3 [Sepia latimanus]
HorA	476538091	S.VDVFFGS(+79.97)L.N	Y	24.83	962.415	8	-0.2	482.215	2	73.21	0	1	15147	1	77	84	Phosphorylation (STY)	S7:Phosphorylation (STY):1000.00	112.31	11	172000000	7	7	19	27055	SP1-Sep-3 [Sepia latimanus]
HorA	476538091	L.TENGK(+14.96)TTC(+57.02)QGDSGGPL.M	Y	24.73	1635.67	16	2.1	818.843	2	41.51	2140000	2	8464	1	196	211	Alpha-amino adipic acid; Carbamidomethylation	K5:Alpha-amino adipic acid:1000.00;C8:Carbamidomethylation:1000.00	112.31	11	172000000	7	7	19	27055	SP1-Sep-3 [Sepia latimanus]
HorA	871229830	D.KGAC(+57.02)N(+.98)GDS(+79.97)GGPL.I	Y	51.7	1212.45	12	0.5	607.232	2	50.55	10200000	2	10418	2	677	688	Carbamidomethylation; Deamidation (NQ); Phosphorylation (STY)	C4:Carbamidomethylation:1000.00;N5:Deamidation (NQ):1000.00;S8:Phosphorylation (STY):1000.00	110.74	4	276000000	6	4	14	84875	PREDICTED: uncharacterized protein LOC101856651 [Aplysia californica]
HorA	871229830	G.DK(+31.99)GAC(+57.02)NGDSGGPL.I	Y	39.77	1278.51	13	-5	640.261	2	36.85	217000000	2	7451	5	676	688	Dihydroxy; Carbamidomethylation	K2:Dihydroxy:112.07;C5:Carbamidomethylation:1000.00	110.74	4	276000000	6	4	14	84875	PREDICTED: uncharacterized protein LOC101856651 [Aplysia californica]
HorA	871229830	D.KGAC(+57.02)N(+.98)GDSGGPL.I	Y	34.81	1132.48	12	5	567.251	2	50.59	2390000	2	10427	1	677	688	Carbamidomethylation; Deamidation (NQ)	C4:Carbamidomethylation:1000.00;N5:Deamidation (NQ):1000.00	110.74	4	276000000	6	4	14	84875	PREDICTED: uncharacterized protein LOC101856651 [Aplysia californica]
HorA	871229830	N.GDK(+31.99)GAC(+57.02)NGDSGGPL.I	Y	32.89	1335.54	14	-5.1	668.772	2	32.51	3920000	1	6498	1	675	688	Dihydroxy; Carbamidomethylation	K3:Dihydroxy:85.84;C6:Carbamidomethylation:1000.00	110.74	4	276000000	6	4	14	84875	PREDICTED: uncharacterized protein LOC101856651 [Aplysia californica]
HorA	871229830	G.ACNGDSGGPL.I	N	32.41	889.36	10	-1.3	445.687	2	49.96	16400000	2	10293	1	679	688			110.74	4	276000000	6	4	14	84875	PREDICTED: uncharacterized protein LOC101856651 [Aplysia californica]
HorA	871229830	D.K(+226.08)GAC(+57.02)NGDSGGPL.I	Y	30.38	1357.58	12	-2	679.794	2	58.43	1220000	2	12111	1	677	688	Biotinylation; Carbamidomethylation	K1:Biotinylation:1000.00;C4:Carbamidomethylation:1000.00	110.74	4	276000000	6	4	14	84875	PREDICTED: uncharacterized protein LOC101856651 [Aplysia californica]
HorA	871229830	A.C(+57.02)NGD(-18.01)SGGPL.I	N	27.24	857.334	9	-1.1	429.674	2	51.35	8250000	2	10589	1	680	688	Carbamidomethylation; Dehydration	C1:Carbamidomethylation:1000.00;D4:Dehydration:17.01	110.74	4	276000000	6	4	14	84875	PREDICTED: uncharacterized protein LOC101856651 [Aplysia californica]
HorA	871229830	G.D(+31.97)KGAC(+57.02)NGDSGGPL.I	Y	26.35	1278.5	13	-0.9	640.255	2	52.98	40100000	1	10868	1	676	688	Persulfide; Carbamidomethylation	D1:Persulfide:8.52;C5:Carbamidomethylation:1000.00	110.74	4	276000000	6	4	14	84875	PREDICTED: uncharacterized protein LOC101856651 [Aplysia californica]
HorA	871229830	P.TTTT(+79.97)EIPTTEPETTI.T	Y	26.19	1713.76	15	-1.9	572.26	3	45.87	1760000	2	9407	1	449	463	Phosphorylation (STY)	T4:Phosphorylation (STY):17.01	110.74	4	276000000	6	4	14	84875	PREDICTED: uncharacterized protein LOC101856651 [Aplysia californica]
HorA	472820235	G.LSSSGGKDAC(+57.02)QGDSGGPL.I	Y	42.7	1691.74	18	-2.9	846.876	2	55.46	2480000	2	11468	1	270	287	Carbamidomethylation	C10:Carbamidomethylation:1000.00	107.65	6	235000000	7	6	33	35912	serine protease [Sinonovacula constricta]
HorA	472820235	D.A(+43.01)C(+57.02)QGDSGGPL.I	N	38.54	1003.4	10	-0.5	502.709	2	50.69	207000000	1	10376	5	278	287	Carbamylation; Carbamidomethylation	A1:Carbamylation:1000.00;C2:Carbamidomethylation:1000.00	107.65	6	235000000	7	6	33	35912	serine protease [Sinonovacula constricta]
HorA	472820235	G.LSSSGGK(+14.02)DAC(+57.02)QGDSGGPL.I	Y	36.94	1705.76	18	-5.8	853.881	2	54.93	3790000	2	11357	2	270	287	Methylation(KR); Carbamidomethylation	K7:Methylation(KR):1000.00;C10:Carbamidomethylation:1000.00	107.65	6	235000000	7	6	33	35912	serine protease [Sinonovacula constricta]
HorA	472820235	S.GGKD(+55.92)AC(+57.02)QGDSGGPL.I	Y	36.01	1373.48	14	-0.9	687.747	2	52.18	6840000	2	10771	3	274	287	Replacement of 2 protons by nickel; Carbamidomethylation	D4:Replacement of 2 protons by nickel:19.39;C6:Carbamidomethylation:1000.00	107.65	6	235000000	7	6	33	35912	serine protease [Sinonovacula constricta]
HorA	472820235	I.C(+57.02)AGLSSS(+238.23)GGKDAC(+57.02)QGDSGGPL.I	Y	35	2218.06	21	-0.2	740.361	3	43.62	131000000	2	8922	10	267	287	Carbamidomethylation; Palmitoylation	C1:Carbamidomethylation:1000.00;S7:Palmitoylation:0.00;C13:Carbamidomethylation:1000.00	107.65	6	235000000	7	6	33	35912	serine protease [Sinonovacula constricta]
HorA	472820235	D.A(+362.14)C(+57.02)QGDSGGPL.I	N	34.7	1322.53	10	-0.3	662.274	2	36.59	12300000	2	7394	3	278	287	Nucleophilic addtion to cytopiloyne; Carbamidomethylation	A1:Nucleophilic addtion to cytopiloyne:51.00;C2:Carbamidomethylation:1000.00	107.65	6	235000000	7	6	33	35912	serine protease [Sinonovacula constricta]
HorA	472820235	G.LSSSGGK(+44.03)DAC(+57.02)QGDSGGPL.I	Y	34.12	1735.77	18	-4.5	868.888	2	54.87	53500000	2	11344	3	270	287	Ethanolation (KR); Carbamidomethylation	K7:Ethanolation (KR):1000.00;C10:Carbamidomethylation:1000.00	107.65	6	235000000	7	6	33	35912	serine protease [Sinonovacula constricta]
HorA	472820235	C.AGLSSSGGKDACQGDSGGPL.I	Y	31.79	1762.78	20	-2.3	882.395	2	63.24	0	2	13154	1	268	287			107.65	6	235000000	7	6	33	35912	serine protease [Sinonovacula constricta]
HorA	472820235	L.SSSGGKDAC(+57.02)QGDSGGPL.I	Y	30.8	1578.66	17	-4.2	790.333	2	39.15	28300000	2	7956	3	271	287	Carbamidomethylation	C9:Carbamidomethylation:1000.00	107.65	6	235000000	7	6	33	35912	serine protease [Sinonovacula constricta]
HorA	472820235	S.S(+134.05)GGKDAC(+57.02)QGDSGGPL.I	Y	30.6	1538.64	15	-0.1	770.328	2	35.57	9290000	2	7177	1	273	287	3-methyl-2-pyridyl isocyanate; Carbamidomethylation	S1:3-methyl-2-pyridyl isocyanate:1000.00;C7:Carbamidomethylation:1000.00	107.65	6	235000000	7	6	33	35912	serine protease [Sinonovacula constricta]
HorA	472820235	L.SSSGGKDACQGDSGGPL.I	Y	25.47	1521.64	17	-4.1	761.822	2	38.35	0	2	7779	1	271	287			107.65	6	235000000	7	6	33	35912	serine protease [Sinonovacula constricta]
HorA	1205813657	A.AT(-2.02)ESSQTGRDSC(+57.02)QGDSGGPL.F	Y	48.36	2006.82	20	-1	1004.42	2	66.55	1260000	1	13743	1	508	527	2-amino-3-oxo-butanoic_acid; Carbamidomethylation	T2:2-amino-3-oxo-butanoic_acid:0.00;C12:Carbamidomethylation:1000.00	106.62	3	6350000	6	3	21	65093	Tryptase [Mizuhopecten yessoensis]
HorA	1205813657	G.R(+14.02)DS(+79.97)C(+57.02)QGDSGGPL.F	N	39.86	1341.5	12	6.1	671.762	2	43.29	67800000	2	8850	5	516	527	Methylation(KR); Phosphorylation (STY); Carbamidomethylation	R1:Methylation(KR):1000.00;S3:Phosphorylation (STY):61.26;C4:Carbamidomethylation:1000.00	106.62	3	6350000	6	3	21	65093	Tryptase [Mizuhopecten yessoensis]
HorA	1205813657	T.GR(+14.02)DS(+79.97)C(+57.02)QGDSGGPL.F	N	39.1	1398.52	13	6.5	700.274	2	45.62	6510000	2	9353	3	515	527	Methylation(KR); Phosphorylation (STY); Carbamidomethylation	R2:Methylation(KR):1000.00;S4:Phosphorylation (STY):53.98;C5:Carbamidomethylation:1000.00	106.62	3	6350000	6	3	21	65093	Tryptase [Mizuhopecten yessoensis]
HorA	1205813657	A.TESSQTGRDS(-18.01)C(+57.02)QGDSGGPL.F	Y	36.81	1919.79	19	0.2	960.903	2	64.95	0	1	13406	1	509	527	Dehydration; Carbamidomethylation	S10:Dehydration:1.34;C11:Carbamidomethylation:1000.00	106.62	3	6350000	6	3	21	65093	Tryptase [Mizuhopecten yessoensis]
HorA	1205813657	G.R(+88.00)DSC(+57.02)QGDSGGPL.F	N	35.4	1335.52	12	-0.8	668.766	2	53.3	109000000	1	10936	3	516	527	3-sulfanylpropanoyl; Carbamidomethylation	R1:3-sulfanylpropanoyl:1000.00;C4:Carbamidomethylation:1000.00	106.62	3	6350000	6	3	21	65093	Tryptase [Mizuhopecten yessoensis]
HorA	1205813657	G.RDSC(+57.02)QGDSGGPL.F	N	35.23	1247.52	12	1.8	624.768	2	40.82	6900000	2	8315	2	516	527	Carbamidomethylation	C4:Carbamidomethylation:1000.00	106.62	3	6350000	6	3	21	65093	Tryptase [Mizuhopecten yessoensis]
HorA	1205813657	D.S(+42.01)(+79.97)C(+57.02)QGDSGGPL.F	N	35.23	1098.37	10	7.9	550.196	2	58.49	7540000	2	12123	2	518	527	Acetylation (N-term); Phosphorylation (STY); Carbamidomethylation	S1:Acetylation (N-term):1000.00;S1:Phosphorylation (STY):43.82;C2:Carbamidomethylation:1000.00	106.62	3	6350000	6	3	21	65093	Tryptase [Mizuhopecten yessoensis]
HorA	1205813657	A.TES(-2.02)SQTGRDSC(+57.02)QGDSGGPL.F	Y	29.93	1935.79	19	-1	968.9	2	60.27	1960000	1	12417	1	509	527	2-amino-3-oxo-butanoic_acid; Carbamidomethylation	S3:2-amino-3-oxo-butanoic_acid:0.00;C11:Carbamidomethylation:1000.00	106.62	3	6350000	6	3	21	65093	Tryptase [Mizuhopecten yessoensis]
HorA	1205813657	G.RD(+31.97)SC(+57.02)QGDSGGPL.F	N	27.58	1279.49	12	0.6	640.754	2	39.77	1640000	2	8088	1	516	527	Persulfide; Carbamidomethylation	D2:Persulfide:22.07;C4:Carbamidomethylation:1000.00	106.62	3	6350000	6	3	21	65093	Tryptase [Mizuhopecten yessoensis]
HorA	1205813657	S.S(+42.01)Q(+.98)TGRDSC(+57.02)QGDSGGPL.F	Y	24.83	1663.67	16	-5.5	832.84	2	53.62	0	1	11003	1	512	527	Acetylation (N-term); Deamidation (NQ); Carbamidomethylation	S1:Acetylation (N-term):1000.00;Q2:Deamidation (NQ):12.08;C8:Carbamidomethylation:1000.00	106.62	3	6350000	6	3	21	65093	Tryptase [Mizuhopecten yessoensis]
HorA	1205813657	S.S(+314.19)QTGRDSC(+57.02)QGDSGGPL.F	Y	24.58	1934.87	16	-0.1	645.963	3	50.38	3130000	1	10312	1	512	527	Levuglandinyl-lysine anhydrolactam adduct; Carbamidomethylation	S1:Levuglandinyl-lysine anhydrolactam adduct:1000.00;C8:Carbamidomethylation:1000.00	106.62	3	6350000	6	3	21	65093	Tryptase [Mizuhopecten yessoensis]
HorA	1207984389	A.AT(-2.02)ESSQTGRDSC(+57.02)QGDSGGPL.F	Y	48.36	2006.82	20	-1	1004.42	2	66.55	1260000	1	13743	1	530	549	2-amino-3-oxo-butanoic_acid; Carbamidomethylation	T2:2-amino-3-oxo-butanoic_acid:0.00;C12:Carbamidomethylation:1000.00	106.62	3	6350000	6	3	21	67760	uncharacterized protein LOC110442526 [Mizuhopecten yessoensis]
HorA	1207984389	G.R(+14.02)DS(+79.97)C(+57.02)QGDSGGPL.F	N	39.86	1341.5	12	6.1	671.762	2	43.29	67800000	2	8850	5	538	549	Methylation(KR); Phosphorylation (STY); Carbamidomethylation	R1:Methylation(KR):1000.00;S3:Phosphorylation (STY):61.26;C4:Carbamidomethylation:1000.00	106.62	3	6350000	6	3	21	67760	uncharacterized protein LOC110442526 [Mizuhopecten yessoensis]
HorA	1207984389	T.GR(+14.02)DS(+79.97)C(+57.02)QGDSGGPL.F	N	39.1	1398.52	13	6.5	700.274	2	45.62	6510000	2	9353	3	537	549	Methylation(KR); Phosphorylation (STY); Carbamidomethylation	R2:Methylation(KR):1000.00;S4:Phosphorylation (STY):53.98;C5:Carbamidomethylation:1000.00	106.62	3	6350000	6	3	21	67760	uncharacterized protein LOC110442526 [Mizuhopecten yessoensis]
HorA	1207984389	A.TESSQTGRDS(-18.01)C(+57.02)QGDSGGPL.F	Y	36.81	1919.79	19	0.2	960.903	2	64.95	0	1	13406	1	531	549	Dehydration; Carbamidomethylation	S10:Dehydration:1.34;C11:Carbamidomethylation:1000.00	106.62	3	6350000	6	3	21	67760	uncharacterized protein LOC110442526 [Mizuhopecten yessoensis]
HorA	1207984389	G.R(+88.00)DSC(+57.02)QGDSGGPL.F	N	35.4	1335.52	12	-0.8	668.766	2	53.3	109000000	1	10936	3	538	549	3-sulfanylpropanoyl; Carbamidomethylation	R1:3-sulfanylpropanoyl:1000.00;C4:Carbamidomethylation:1000.00	106.62	3	6350000	6	3	21	67760	uncharacterized protein LOC110442526 [Mizuhopecten yessoensis]
HorA	1207984389	G.RDSC(+57.02)QGDSGGPL.F	N	35.23	1247.52	12	1.8	624.768	2	40.82	6900000	2	8315	2	538	549	Carbamidomethylation	C4:Carbamidomethylation:1000.00	106.62	3	6350000	6	3	21	67760	uncharacterized protein LOC110442526 [Mizuhopecten yessoensis]
HorA	1207984389	D.S(+42.01)(+79.97)C(+57.02)QGDSGGPL.F	N	35.23	1098.37	10	7.9	550.196	2	58.49	7540000	2	12123	2	540	549	Acetylation (N-term); Phosphorylation (STY); Carbamidomethylation	S1:Acetylation (N-term):1000.00;S1:Phosphorylation (STY):43.82;C2:Carbamidomethylation:1000.00	106.62	3	6350000	6	3	21	67760	uncharacterized protein LOC110442526 [Mizuhopecten yessoensis]
HorA	1207984389	A.TES(-2.02)SQTGRDSC(+57.02)QGDSGGPL.F	Y	29.93	1935.79	19	-1	968.9	2	60.27	1960000	1	12417	1	531	549	2-amino-3-oxo-butanoic_acid; Carbamidomethylation	S3:2-amino-3-oxo-butanoic_acid:0.00;C11:Carbamidomethylation:1000.00	106.62	3	6350000	6	3	21	67760	uncharacterized protein LOC110442526 [Mizuhopecten yessoensis]
HorA	1207984389	G.RD(+31.97)SC(+57.02)QGDSGGPL.F	N	27.58	1279.49	12	0.6	640.754	2	39.77	1640000	2	8088	1	538	549	Persulfide; Carbamidomethylation	D2:Persulfide:22.07;C4:Carbamidomethylation:1000.00	106.62	3	6350000	6	3	21	67760	uncharacterized protein LOC110442526 [Mizuhopecten yessoensis]
HorA	1207984389	S.S(+42.01)Q(+.98)TGRDSC(+57.02)QGDSGGPL.F	Y	24.83	1663.67	16	-5.5	832.84	2	53.62	0	1	11003	1	534	549	Acetylation (N-term); Deamidation (NQ); Carbamidomethylation	S1:Acetylation (N-term):1000.00;Q2:Deamidation (NQ):12.08;C8:Carbamidomethylation:1000.00	106.62	3	6350000	6	3	21	67760	uncharacterized protein LOC110442526 [Mizuhopecten yessoensis]
HorA	1207984389	S.S(+314.19)QTGRDSC(+57.02)QGDSGGPL.F	Y	24.58	1934.87	16	-0.1	645.963	3	50.38	3130000	1	10312	1	534	549	Levuglandinyl-lysine anhydrolactam adduct; Carbamidomethylation	S1:Levuglandinyl-lysine anhydrolactam adduct:1000.00;C8:Carbamidomethylation:1000.00	106.62	3	6350000	6	3	21	67760	uncharacterized protein LOC110442526 [Mizuhopecten yessoensis]
HorA	1066749195	T.GC(+57.02)QGDS(-18.01)GGPL.T	N	38.14	928.371	10	0.3	465.193	2	50.09	0	2	10320	1	641	650	Carbamidomethylation; Dehydration	C2:Carbamidomethylation:1000.00;S6:Dehydration:0.00	98.88	3	48200000	7	6	13	76171	hypothetical protein [Arion vulgaris]
HorA	1066749195	T.GC(+57.02)QGDSGGPL.T	N	35.78	946.381	10	-1.3	474.197	2	49.87	684000000	2	10273	4	641	650	Carbamidomethylation	C2:Carbamidomethylation:1000.00	98.88	3	48200000	7	6	13	76171	hypothetical protein [Arion vulgaris]
HorA	1066749195	C.AGYLFGRPT(+79.97)GC(+57.02)Q(+.98)GDSGGPL.T	Y	34.94	1989.83	19	-1.1	995.921	2	61.79	1580000	1	12738	2	632	650	Phosphorylation (STY); Carbamidomethylation; Deamidation (NQ)	T9:Phosphorylation (STY):0.00;C11:Carbamidomethylation:1000.00;Q12:Deamidation (NQ):1000.00	98.88	3	48200000	7	6	13	76171	hypothetical protein [Arion vulgaris]
HorA	1066749195	L.F(+43.01)GRPTGC(+57.02)QGDSGGPL.T	Y	32.57	1547.68	15	-0.2	774.846	2	55.05	1610000	2	11383	1	636	650	Carbamylation; Carbamidomethylation	F1:Carbamylation:1000.00;C7:Carbamidomethylation:1000.00	98.88	3	48200000	7	6	13	76171	hypothetical protein [Arion vulgaris]
HorA	1066749195	P.T(+175.04)GC(+57.02)QGDSGGPL.T	Y	31.36	1222.47	11	-0.9	612.242	2	48.95	15600000	1	10006	1	640	650	Naphthalene-2 3-dicarboxaldehyde; Carbamidomethylation	T1:Naphthalene-2 3-dicarboxaldehyde:1000.00;C3:Carbamidomethylation:1000.00	98.88	3	48200000	7	6	13	76171	hypothetical protein [Arion vulgaris]
HorA	1066749195	R.PT(+77.99)GC(+57.02)QGDSGGPL.T	Y	29.85	1222.47	12	-2.1	612.24	2	48.6	22400000	2	10001	1	639	650	Methylphosphonylation; Carbamidomethylation	T2:Methylphosphonylation:45.03;C4:Carbamidomethylation:1000.00	98.88	3	48200000	7	6	13	76171	hypothetical protein [Arion vulgaris]
HorA	1066749195	C.AGYLFGRPTGC(+57.02)QGD(+21.98)SGGPL.T	Y	26.31	1930.86	19	1.1	644.628	3	55.8	705000	1	11463	1	632	650	Carbamidomethylation; Sodium adduct	C11:Carbamidomethylation:1000.00;D14:Sodium adduct:87.95	98.88	3	48200000	7	6	13	76171	hypothetical protein [Arion vulgaris]
HorA	1066749195	P.TGC(+57.02)QGDSGGP(+31.99)LT.C	Y	25.96	1180.47	12	1.2	394.497	3	32.39	4650000	1	6471	1	640	651	Carbamidomethylation; Dihydroxy	C3:Carbamidomethylation:1000.00;P10:Dihydroxy:1000.00	98.88	3	48200000	7	6	13	76171	hypothetical protein [Arion vulgaris]
HorA	1066749195	T.LC(+57.02)AGYLFGRPT(+164.06)GC(+57.02)QGDSGGPL.T	Y	24.72	2346.05	21	-3.5	783.023	3	60.85	1680000	1	12539	1	630	650	Carbamidomethylation; O-Diisopropylphosphorylation	C2:Carbamidomethylation:1000.00;T11:O-Diisopropylphosphorylation:0.00;C13:Carbamidomethylation:1000.00	98.88	3	48200000	7	6	13	76171	hypothetical protein [Arion vulgaris]
HorA	1066749197	T.GC(+57.02)QGDS(-18.01)GGPL.T	N	38.14	928.371	10	0.3	465.193	2	50.09	0	2	10320	1	272	281	Carbamidomethylation; Dehydration	C2:Carbamidomethylation:1000.00;S6:Dehydration:0.00	98.88	7	48200000	7	6	13	36196	hypothetical protein [Arion vulgaris]
HorA	1066749197	T.GC(+57.02)QGDSGGPL.T	N	35.78	946.381	10	-1.3	474.197	2	49.87	684000000	2	10273	4	272	281	Carbamidomethylation	C2:Carbamidomethylation:1000.00	98.88	7	48200000	7	6	13	36196	hypothetical protein [Arion vulgaris]
HorA	1066749197	C.AGYLFGRPT(+79.97)GC(+57.02)Q(+.98)GDSGGPL.T	Y	34.94	1989.83	19	-1.1	995.921	2	61.79	1580000	1	12738	2	263	281	Phosphorylation (STY); Carbamidomethylation; Deamidation (NQ)	T9:Phosphorylation (STY):0.00;C11:Carbamidomethylation:1000.00;Q12:Deamidation (NQ):1000.00	98.88	7	48200000	7	6	13	36196	hypothetical protein [Arion vulgaris]
HorA	1066749197	L.F(+43.01)GRPTGC(+57.02)QGDSGGPL.T	Y	32.57	1547.68	15	-0.2	774.846	2	55.05	1610000	2	11383	1	267	281	Carbamylation; Carbamidomethylation	F1:Carbamylation:1000.00;C7:Carbamidomethylation:1000.00	98.88	7	48200000	7	6	13	36196	hypothetical protein [Arion vulgaris]
HorA	1066749197	P.T(+175.04)GC(+57.02)QGDSGGPL.T	Y	31.36	1222.47	11	-0.9	612.242	2	48.95	15600000	1	10006	1	271	281	Naphthalene-2 3-dicarboxaldehyde; Carbamidomethylation	T1:Naphthalene-2 3-dicarboxaldehyde:1000.00;C3:Carbamidomethylation:1000.00	98.88	7	48200000	7	6	13	36196	hypothetical protein [Arion vulgaris]
HorA	1066749197	R.PT(+77.99)GC(+57.02)QGDSGGPL.T	Y	29.85	1222.47	12	-2.1	612.24	2	48.6	22400000	2	10001	1	270	281	Methylphosphonylation; Carbamidomethylation	T2:Methylphosphonylation:45.03;C4:Carbamidomethylation:1000.00	98.88	7	48200000	7	6	13	36196	hypothetical protein [Arion vulgaris]
HorA	1066749197	C.AGYLFGRPTGC(+57.02)QGD(+21.98)SGGPL.T	Y	26.31	1930.86	19	1.1	644.628	3	55.8	705000	1	11463	1	263	281	Carbamidomethylation; Sodium adduct	C11:Carbamidomethylation:1000.00;D14:Sodium adduct:87.95	98.88	7	48200000	7	6	13	36196	hypothetical protein [Arion vulgaris]
HorA	1066749197	P.TGC(+57.02)QGDSGGP(+31.99)LT.C	Y	25.96	1180.47	12	1.2	394.497	3	32.39	4650000	1	6471	1	271	282	Carbamidomethylation; Dihydroxy	C3:Carbamidomethylation:1000.00;P10:Dihydroxy:1000.00	98.88	7	48200000	7	6	13	36196	hypothetical protein [Arion vulgaris]
HorA	1066749197	T.LC(+57.02)AGYLFGRPT(+164.06)GC(+57.02)QGDSGGPL.T	Y	24.72	2346.05	21	-3.5	783.023	3	60.85	1680000	1	12539	1	261	281	Carbamidomethylation; O-Diisopropylphosphorylation	C2:Carbamidomethylation:1000.00;T11:O-Diisopropylphosphorylation:0.00;C13:Carbamidomethylation:1000.00	98.88	7	48200000	7	6	13	36196	hypothetical protein [Arion vulgaris]
HorA	961106954	A.GY(-18.01)IEGGPDSC(+57.02)QGDSGGPL.V	Y	39.46	1746.72	18	-5.8	874.36	2	60.25	6190000	1	12413	1	1109	1126	Dehydration; Carbamidomethylation	Y2:Dehydration:5.17;C10:Carbamidomethylation:1000.00	98.58	2	98300000	6	5	12	131264	PREDICTED: uncharacterized protein LOC106874327 [Octopus bimaculoides]
HorA	961106954	G.Y(-18.01)IEGGPDSC(+57.02)QGDSGGPL.V	Y	38.5	1689.69	17	-1.7	845.853	2	54.82	70500000	1	11257	2	1110	1126	Dehydration; Carbamidomethylation	Y1:Dehydration:1.69;C9:Carbamidomethylation:1000.00	98.58	2	98300000	6	5	12	131264	PREDICTED: uncharacterized protein LOC106874327 [Octopus bimaculoides]
HorA	961106954	A.GYIEGGPD(-18.01)SC(+57.02)QGDSGGPL.V	Y	35.99	1746.72	18	-9.3	874.357	2	60.29	1500000	2	12513	1	1109	1126	Dehydration; Carbamidomethylation	D8:Dehydration:0.00;C10:Carbamidomethylation:1000.00	98.58	2	98300000	6	5	12	131264	PREDICTED: uncharacterized protein LOC106874327 [Octopus bimaculoides]
HorA	961106954	D.S(+42.01)(+79.97)C(+57.02)QGDSGGPL.V	N	35.23	1098.37	10	7.9	550.196	2	58.49	7540000	2	12123	2	1117	1126	Acetylation (N-term); Phosphorylation (STY); Carbamidomethylation	S1:Acetylation (N-term):1000.00;S1:Phosphorylation (STY):43.82;C2:Carbamidomethylation:1000.00	98.58	2	98300000	6	5	12	131264	PREDICTED: uncharacterized protein LOC106874327 [Octopus bimaculoides]
HorA	961106954	H.ISGWGNTGK(+28.03).A	Y	33.66	946.487	9	1.7	474.252	2	42.21	6520000	2	8616	2	1066	1074	Dimethylation(KR)	K9:Dimethylation(KR):1000.00	98.58	2	98300000	6	5	12	131264	PREDICTED: uncharacterized protein LOC106874327 [Octopus bimaculoides]
HorA	961106954	G.PDSC(+57.02)QGDSGGPL.V	Y	32.77	1188.47	12	-4.7	595.24	2	58.09	9840000	1	11953	2	1115	1126	Carbamidomethylation	C4:Carbamidomethylation:1000.00	98.58	2	98300000	6	5	12	131264	PREDICTED: uncharacterized protein LOC106874327 [Octopus bimaculoides]
HorA	961106954	G.PDS(+122.01)C(+57.02)QGDSGGPL.V	Y	26.12	1310.48	12	-5.8	656.246	2	47.73	441000	2	9812	1	1115	1126	O-Isopropylphosphorylation; Carbamidomethylation	S3:O-Isopropylphosphorylation:30.64;C4:Carbamidomethylation:1000.00	98.58	2	98300000	6	5	12	131264	PREDICTED: uncharacterized protein LOC106874327 [Octopus bimaculoides]
HorA	961106954	E.GGPDS(+162.05)C(+57.02)QGDSGGPL.V	Y	25.89	1464.57	14	-5.8	733.287	2	57.13	3310000	2	11828	1	1113	1126	Hexose (NSY); Carbamidomethylation	S5:Hexose (NSY):29.96;C6:Carbamidomethylation:1000.00	98.58	2	98300000	6	5	12	131264	PREDICTED: uncharacterized protein LOC106874327 [Octopus bimaculoides]
HorA	918310649	A.GY(-18.01)IEGGPDSC(+57.02)QGDSGGPL.V	Y	39.46	1746.72	18	-5.8	874.36	2	60.25	6190000	1	12413	1	103	120	Dehydration; Carbamidomethylation	Y2:Dehydration:5.17;C10:Carbamidomethylation:1000.00	96.61	16	98300000	6	5	12	18424	hypothetical protein OCBIM_22026776mg [Octopus bimaculoides]
HorA	918310649	G.Y(-18.01)IEGGPDSC(+57.02)QGDSGGPL.V	Y	38.5	1689.69	17	-1.7	845.853	2	54.82	70500000	1	11257	2	104	120	Dehydration; Carbamidomethylation	Y1:Dehydration:1.69;C9:Carbamidomethylation:1000.00	96.61	16	98300000	6	5	12	18424	hypothetical protein OCBIM_22026776mg [Octopus bimaculoides]
HorA	918310649	A.GYIEGGPD(-18.01)SC(+57.02)QGDSGGPL.V	Y	35.99	1746.72	18	-9.3	874.357	2	60.29	1500000	2	12513	1	103	120	Dehydration; Carbamidomethylation	D8:Dehydration:0.00;C10:Carbamidomethylation:1000.00	96.61	16	98300000	6	5	12	18424	hypothetical protein OCBIM_22026776mg [Octopus bimaculoides]
HorA	918310649	D.S(+42.01)(+79.97)C(+57.02)QGDSGGPL.V	N	35.23	1098.37	10	7.9	550.196	2	58.49	7540000	2	12123	2	111	120	Acetylation (N-term); Phosphorylation (STY); Carbamidomethylation	S1:Acetylation (N-term):1000.00;S1:Phosphorylation (STY):43.82;C2:Carbamidomethylation:1000.00	96.61	16	98300000	6	5	12	18424	hypothetical protein OCBIM_22026776mg [Octopus bimaculoides]
HorA	918310649	H.ISGWGNTGK(+28.03).A	Y	33.66	946.487	9	1.7	474.252	2	42.21	6520000	2	8616	2	60	68	Dimethylation(KR)	K9:Dimethylation(KR):1000.00	96.61	16	98300000	6	5	12	18424	hypothetical protein OCBIM_22026776mg [Octopus bimaculoides]
HorA	918310649	G.PDSC(+57.02)QGDSGGPL.V	Y	32.77	1188.47	12	-4.7	595.24	2	58.09	9840000	1	11953	2	109	120	Carbamidomethylation	C4:Carbamidomethylation:1000.00	96.61	16	98300000	6	5	12	18424	hypothetical protein OCBIM_22026776mg [Octopus bimaculoides]
HorA	918310649	G.PDS(+122.01)C(+57.02)QGDSGGPL.V	Y	26.12	1310.48	12	-5.8	656.246	2	47.73	441000	2	9812	1	109	120	O-Isopropylphosphorylation; Carbamidomethylation	S3:O-Isopropylphosphorylation:30.64;C4:Carbamidomethylation:1000.00	96.61	16	98300000	6	5	12	18424	hypothetical protein OCBIM_22026776mg [Octopus bimaculoides]
HorA	918310649	E.GGPDS(+162.05)C(+57.02)QGDSGGPL.V	Y	25.89	1464.57	14	-5.8	733.287	2	57.13	3310000	2	11828	1	107	120	Hexose (NSY); Carbamidomethylation	S5:Hexose (NSY):29.96;C6:Carbamidomethylation:1000.00	96.61	16	98300000	6	5	12	18424	hypothetical protein OCBIM_22026776mg [Octopus bimaculoides]
HorA	405975745	Y.A(+71.04)RIITPPPN.Q	Y	48.05	1048.6	9	0.4	525.309	2	21.88	90800000	1	4210	6	1228	1236	Propionamide (K X@N-term)	A1:Propionamide (K X@N-term):1000.00	98.58	1	151000000	3	3	17	140457	Nuclear factor related to kappa-B-binding protein [CrassOstrea edulis gigas]
HorA	405975745	Y.ARIITPPPN.Q	Y	44.65	977.566	9	1	489.791	2	22.64	8710000	2	4382	3	1228	1236			98.58	1	151000000	3	3	17	140457	Nuclear factor related to kappa-B-binding protein [CrassOstrea edulis gigas]
HorA	405975745	A.RIITPPPN.Q	Y	41.59	906.529	8	-0.4	454.272	2	19.69	40000000	2	3747	4	1229	1236			98.58	1	151000000	3	3	17	140457	Nuclear factor related to kappa-B-binding protein [CrassOstrea edulis gigas]
HorA	405975745	V.GPVK(+43.01)GVYTK.D	Y	35.78	990.55	9	-0.5	496.282	2	17.99	11600000	2	3386	3	603	611	Carbamylation	K4:Carbamylation:6.63	98.58	1	151000000	3	3	17	140457	Nuclear factor related to kappa-B-binding protein [CrassOstrea edulis gigas]
HorA	405975745	Y.A(+43.01)RIITPPPN.Q	Y	25.32	1020.57	9	0	511.293	2	19	0	1	3598	1	1228	1236	Carbamylation	A1:Carbamylation:1000.00	98.58	1	151000000	3	3	17	140457	Nuclear factor related to kappa-B-binding protein [CrassOstrea edulis gigas]
HorA	762092244	Y.A(+71.04)RIITPPPN.Q	Y	48.05	1048.6	9	0.4	525.309	2	21.88	90800000	1	4210	6	1234	1242	Propionamide (K X@N-term)	A1:Propionamide (K X@N-term):1000.00	100.81	1	151000000	3	3	17	140940	PREDICTED: nuclear factor related to kappa-B-binding protein [CrassOstrea edulis gigas]
HorA	762092244	Y.ARIITPPPN.Q	Y	44.65	977.566	9	1	489.791	2	22.64	8710000	2	4382	3	1234	1242			100.81	1	151000000	3	3	17	140940	PREDICTED: nuclear factor related to kappa-B-binding protein [CrassOstrea edulis gigas]
HorA	762092244	A.RIITPPPN.Q	Y	41.59	906.529	8	-0.4	454.272	2	19.69	40000000	2	3747	4	1235	1242			100.81	1	151000000	3	3	17	140940	PREDICTED: nuclear factor related to kappa-B-binding protein [CrassOstrea edulis gigas]
HorA	762092244	V.GPVK(+43.01)GVYTK.D	Y	35.78	990.55	9	-0.5	496.282	2	17.99	11600000	2	3386	3	586	594	Carbamylation	K4:Carbamylation:6.63	100.81	1	151000000	3	3	17	140940	PREDICTED: nuclear factor related to kappa-B-binding protein [CrassOstrea edulis gigas]
HorA	762092244	Y.A(+43.01)RIITPPPN.Q	Y	25.32	1020.57	9	0	511.293	2	19	0	1	3598	1	1234	1242	Carbamylation	A1:Carbamylation:1000.00	100.81	1	151000000	3	3	17	140940	PREDICTED: nuclear factor related to kappa-B-binding protein [CrassOstrea edulis gigas]
HorA	762092246	Y.A(+71.04)RIITPPPN.Q	Y	48.05	1048.6	9	0.4	525.309	2	21.88	90800000	1	4210	6	1234	1242	Propionamide (K X@N-term)	A1:Propionamide (K X@N-term):1000.00	98.58	1	151000000	3	3	17	140940	PREDICTED: nuclear factor related to kappa-B-binding protein [CrassOstrea edulis gigas]
HorA	762092246	Y.ARIITPPPN.Q	Y	44.65	977.566	9	1	489.791	2	22.64	8710000	2	4382	3	1234	1242			98.58	1	151000000	3	3	17	140940	PREDICTED: nuclear factor related to kappa-B-binding protein [CrassOstrea edulis gigas]
HorA	762092246	A.RIITPPPN.Q	Y	41.59	906.529	8	-0.4	454.272	2	19.69	40000000	2	3747	4	1235	1242			98.58	1	151000000	3	3	17	140940	PREDICTED: nuclear factor related to kappa-B-binding protein [CrassOstrea edulis gigas]
HorA	762092246	V.GPVK(+43.01)GVYTK.D	Y	35.78	990.55	9	-0.5	496.282	2	17.99	11600000	2	3386	3	586	594	Carbamylation	K4:Carbamylation:6.63	98.58	1	151000000	3	3	17	140940	PREDICTED: nuclear factor related to kappa-B-binding protein [CrassOstrea edulis gigas]
HorA	762092246	Y.A(+43.01)RIITPPPN.Q	Y	25.32	1020.57	9	0	511.293	2	19	0	1	3598	1	1234	1242	Carbamylation	A1:Carbamylation:1000.00	98.58	1	151000000	3	3	17	140940	PREDICTED: nuclear factor related to kappa-B-binding protein [CrassOstrea edulis gigas]
HorA	762092242	Y.A(+71.04)RIITPPPN.Q	Y	48.05	1048.6	9	0.4	525.309	2	21.88	90800000	1	4210	6	1234	1242	Propionamide (K X@N-term)	A1:Propionamide (K X@N-term):1000.00	98.58	1	151000000	3	3	17	140940	PREDICTED: nuclear factor related to kappa-B-binding protein [CrassOstrea edulis gigas]
HorA	762092242	Y.ARIITPPPN.Q	Y	44.65	977.566	9	1	489.791	2	22.64	8710000	2	4382	3	1234	1242			98.58	1	151000000	3	3	17	140940	PREDICTED: nuclear factor related to kappa-B-binding protein [CrassOstrea edulis gigas]
HorA	762092242	A.RIITPPPN.Q	Y	41.59	906.529	8	-0.4	454.272	2	19.69	40000000	2	3747	4	1235	1242			98.58	1	151000000	3	3	17	140940	PREDICTED: nuclear factor related to kappa-B-binding protein [CrassOstrea edulis gigas]
HorA	762092242	V.GPVK(+43.01)GVYTK.D	Y	35.78	990.55	9	-0.5	496.282	2	17.99	11600000	2	3386	3	586	594	Carbamylation	K4:Carbamylation:6.63	98.58	1	151000000	3	3	17	140940	PREDICTED: nuclear factor related to kappa-B-binding protein [CrassOstrea edulis gigas]
HorA	762092242	Y.A(+43.01)RIITPPPN.Q	Y	25.32	1020.57	9	0	511.293	2	19	0	1	3598	1	1234	1242	Carbamylation	A1:Carbamylation:1000.00	98.58	1	151000000	3	3	17	140940	PREDICTED: nuclear factor related to kappa-B-binding protein [CrassOstrea edulis gigas]
HorA	908486261	G.R(+14.02)DS(+79.97)C(+57.02)QGDSGGPL.A	N	39.86	1341.5	12	6.1	671.762	2	43.29	67800000	2	8850	5	116	127	Methylation(KR); Phosphorylation (STY); Carbamidomethylation	R1:Methylation(KR):1000.00;S3:Phosphorylation (STY):61.26;C4:Carbamidomethylation:1000.00	90	9	70500000	5	2	20	18879	PREDICTED: testisin-like partial [Biomphalaria glabrata]
HorA	908486261	P.GR(+14.02)DS(+79.97)C(+57.02)QGDSGGPL.A	N	39.1	1398.52	13	6.5	700.274	2	45.62	6510000	2	9353	3	115	127	Methylation(KR); Phosphorylation (STY); Carbamidomethylation	R2:Methylation(KR):1000.00;S4:Phosphorylation (STY):53.98;C5:Carbamidomethylation:1000.00	90	9	70500000	5	2	20	18879	PREDICTED: testisin-like partial [Biomphalaria glabrata]
HorA	908486261	G.R(+88.00)DSC(+57.02)QGDSGGPL.A	N	35.4	1335.52	12	-0.8	668.766	2	53.3	109000000	1	10936	3	116	127	3-sulfanylpropanoyl; Carbamidomethylation	R1:3-sulfanylpropanoyl:1000.00;C4:Carbamidomethylation:1000.00	90	9	70500000	5	2	20	18879	PREDICTED: testisin-like partial [Biomphalaria glabrata]
HorA	908486261	G.RDSC(+57.02)QGDSGGPL.A	N	35.23	1247.52	12	1.8	624.768	2	40.82	6900000	2	8315	2	116	127	Carbamidomethylation	C4:Carbamidomethylation:1000.00	90	9	70500000	5	2	20	18879	PREDICTED: testisin-like partial [Biomphalaria glabrata]
HorA	908486261	D.S(+42.01)(+79.97)C(+57.02)QGDSGGPL.A	N	35.23	1098.37	10	7.9	550.196	2	58.49	7540000	2	12123	2	118	127	Acetylation (N-term); Phosphorylation (STY); Carbamidomethylation	S1:Acetylation (N-term):1000.00;S1:Phosphorylation (STY):43.82;C2:Carbamidomethylation:1000.00	90	9	70500000	5	2	20	18879	PREDICTED: testisin-like partial [Biomphalaria glabrata]
HorA	908486261	A.GS(+162.05)PGRDSC(+57.02)QGDSGGPL.A	Y	31.99	1707.7	16	-4.8	854.854	2	44.58	2400000	2	9128	2	112	127	Hexose (NSY); Carbamidomethylation	S2:Hexose (NSY):10.65;C8:Carbamidomethylation:1000.00	90	9	70500000	5	2	20	18879	PREDICTED: testisin-like partial [Biomphalaria glabrata]
HorA	908486261	G.RD(+31.97)SC(+57.02)QGDSGGPL.A	N	27.58	1279.49	12	0.6	640.754	2	39.77	1640000	2	8088	1	116	127	Persulfide; Carbamidomethylation	D2:Persulfide:22.07;C4:Carbamidomethylation:1000.00	90	9	70500000	5	2	20	18879	PREDICTED: testisin-like partial [Biomphalaria glabrata]
HorA	908486261	S.PGRDS(+120.03)C(+57.02)QGDSGGPL.A	Y	25.86	1521.63	14	1.3	761.822	2	39.28	15400000	1	7943	1	114	127	O-Isopropylmethylphosphonylation; Carbamidomethylation	S5:O-Isopropylmethylphosphonylation:55.60;C6:Carbamidomethylation:1000.00	90	9	70500000	5	2	20	18879	PREDICTED: testisin-like partial [Biomphalaria glabrata]
HorA	908486261	S.PGRDS(+164.06)C(+57.02)QGDSGGPL.A	Y	25.53	1565.65	14	0.5	783.835	2	36.27	52700000	2	7327	1	114	127	O-Diisopropylphosphorylation; Carbamidomethylation	S5:O-Diisopropylphosphorylation:8.26;C6:Carbamidomethylation:1000.00	90	9	70500000	5	2	20	18879	PREDICTED: testisin-like partial [Biomphalaria glabrata]
HorA	908493726	L.GK(+31.99)DSC(+57.02)QGDSGGPL.A	N	39.42	1308.53	13	-1.4	655.269	2	36.03	26800000	2	7276	1	50	62	Dihydroxy; Carbamidomethylation	K2:Dihydroxy:96.11;C5:Carbamidomethylation:1000.00	89.84	17	63300000	5	3	10	11236	PREDICTED: cationic trypsin-3-like [Biomphalaria glabrata]
HorA	908493726	D.S(+42.01)(+79.97)C(+57.02)QGDSGGPL.A	N	35.23	1098.37	10	7.9	550.196	2	58.49	7540000	2	12123	2	53	62	Acetylation (N-term); Phosphorylation (STY); Carbamidomethylation	S1:Acetylation (N-term):1000.00;S1:Phosphorylation (STY):43.82;C2:Carbamidomethylation:1000.00	89.84	17	63300000	5	3	10	11236	PREDICTED: cationic trypsin-3-like [Biomphalaria glabrata]
HorA	908493726	F.C(+57.02)AGTLGKDSC(+57.02)QGDSGGPL.A	Y	31.79	1778.76	18	4.3	890.389	2	48.14	0	2	9900	1	45	62	Carbamidomethylation	C1:Carbamidomethylation:1000.00;C10:Carbamidomethylation:1000.00	89.84	17	63300000	5	3	10	11236	PREDICTED: cationic trypsin-3-like [Biomphalaria glabrata]
HorA	908493726	F.C(+71.04)AGTLGKDSC(+57.02)QGDSGGPL.A	Y	28.96	1792.77	18	4.5	897.397	2	55.53	17900000	2	11483	2	45	62	Propionamide; Carbamidomethylation	C1:Propionamide:5.31;C10:Carbamidomethylation:1000.00	89.84	17	63300000	5	3	10	11236	PREDICTED: cationic trypsin-3-like [Biomphalaria glabrata]
HorA	908493726	F.C(+57.02)AGTLGK(+383.23)DSC(+57.02)QGDSGGPL.A	Y	28.34	2161.98	18	6.1	721.673	3	26.67	42700000	2	5248	1	45	62	Carbamidomethylation; Ubiquitination	C1:Carbamidomethylation:1000.00;K7:Ubiquitination:1000.00;C10:Carbamidomethylation:1000.00	89.84	17	63300000	5	3	10	11236	PREDICTED: cationic trypsin-3-like [Biomphalaria glabrata]
HorA	908493726	G.TLGKDS(+114.04)C(+57.02)QGDSGGPL.A	Y	28.29	1604.71	15	-5.4	803.358	2	55.31	290000	2	11437	1	48	62	Ubiquitin; Carbamidomethylation	S6:Ubiquitin:0.00;C7:Carbamidomethylation:1000.00	89.84	17	63300000	5	3	10	11236	PREDICTED: cationic trypsin-3-like [Biomphalaria glabrata]
HorA	908493726	T.LGK(+149.03)DSC(+57.02)QGDSGGPL.A	Y	25.72	1538.65	14	-3.6	770.329	2	35.83	1980000	1	7207	1	49	62	Benzyl isothiocyanate; Carbamidomethylation	K3:Benzyl isothiocyanate:5.99;C6:Carbamidomethylation:1000.00	89.84	17	63300000	5	3	10	11236	PREDICTED: cationic trypsin-3-like [Biomphalaria glabrata]
HorA	908493726	G.TLGK(+87.03)DSC(+57.02)QGDSGGPL.A	Y	25.71	1577.7	15	-4.6	789.853	2	54.56	485000	2	11279	1	48	62	Glycidamide adduct; Carbamidomethylation	K4:Glycidamide adduct:3.64;C7:Carbamidomethylation:1000.00	89.84	17	63300000	5	3	10	11236	PREDICTED: cationic trypsin-3-like [Biomphalaria glabrata]
HorA	1066775465	H.AHD(-18.01)AC(+57.02)QGDSGGPL.L	Y	39.7	1265.51	13	1.7	633.763	2	42.98	954000	1	8737	1	37	49	Dehydration; Carbamidomethylation	D3:Dehydration:19.39;C5:Carbamidomethylation:1000.00	89.44	24	179000000	5	4	12	11926	hypothetical protein partial [Arion vulgaris]
HorA	1066775465	D.A(+43.01)C(+57.02)QGDSGGPL.L	N	38.54	1003.4	10	-0.5	502.709	2	50.69	207000000	1	10376	5	40	49	Carbamylation; Carbamidomethylation	A1:Carbamylation:1000.00;C2:Carbamidomethylation:1000.00	89.44	24	179000000	5	4	12	11926	hypothetical protein partial [Arion vulgaris]
HorA	1066775465	D.A(+362.14)C(+57.02)QGDSGGPL.L	N	34.7	1322.53	10	-0.3	662.274	2	36.59	12300000	2	7394	3	40	49	Nucleophilic addtion to cytopiloyne; Carbamidomethylation	A1:Nucleophilic addtion to cytopiloyne:51.00;C2:Carbamidomethylation:1000.00	89.44	24	179000000	5	4	12	11926	hypothetical protein partial [Arion vulgaris]
HorA	1066775465	A.GGAHAHDAC(+57.02)Q(+.98)GDSGGPL.L	Y	34.25	1606.64	17	1	804.33	2	53.37	2530000	1	10950	1	33	49	Carbamidomethylation; Deamidation (NQ)	C9:Carbamidomethylation:1000.00;Q10:Deamidation (NQ):1000.00	89.44	24	179000000	5	4	12	11926	hypothetical protein partial [Arion vulgaris]
HorA	1066775465	A.HDH(sub A)CQGDSGGPL.L	Y	29.86	1221.48	12	2.7	611.75	2	35.34	171000000	1	7103	1	38	49			89.44	24	179000000	5	4	12	11926	hypothetical protein partial [Arion vulgaris]
HorA	1066775465	Q.PNT(+27.05)PGVYTK.L	Y	29.5	1002.55	9	1	502.283	2	29.53	4640000	1	5860	1	75	83	Ethyl amino	T3:Ethyl amino:77.53	89.44	24	179000000	5	4	12	11926	hypothetical protein partial [Arion vulgaris]
HorA	762155040	R.GQ(sub H)DGCQGDSGGPLLCPEV.V	Y	40.91	1730.72	18	1.7	577.916	3	62.77	5990000	2	13049	1	857	874			89.23	3	6950000	3	2	7	101417	PREDICTED: atrial natriuretic peptide-converting enzyme isoform X2 [CrassOstrea edulis gigas]
HorA	762155040	D.GC(+57.02)QGDS(-18.01)GGPL.L	N	38.14	928.371	10	0.3	465.193	2	50.09	0	2	10320	1	860	869	Carbamidomethylation; Dehydration	C2:Carbamidomethylation:1000.00;S6:Dehydration:0.00	89.23	3	6950000	3	2	7	101417	PREDICTED: atrial natriuretic peptide-converting enzyme isoform X2 [CrassOstrea edulis gigas]
HorA	762155040	D.GC(+57.02)QGDSGGPL.L	N	35.78	946.381	10	-1.3	474.197	2	49.87	684000000	2	10273	4	860	869	Carbamidomethylation	C2:Carbamidomethylation:1000.00	89.23	3	6950000	3	2	7	101417	PREDICTED: atrial natriuretic peptide-converting enzyme isoform X2 [CrassOstrea edulis gigas]
HorA	762155040	P.KDS(+79.97)VST(+79.97)TTVAS.T	Y	25.49	1254.48	11	2.3	628.248	2	69.19	960000	2	14447	1	93	103	Phosphorylation (STY)	S3:Phosphorylation (STY):0.00;T6:Phosphorylation (STY):0.00	89.23	3	6950000	3	2	7	101417	PREDICTED: atrial natriuretic peptide-converting enzyme isoform X2 [CrassOstrea edulis gigas]
HorA	762155038	R.GQ(sub H)DGCQGDSGGPLLCPEV.V	Y	40.91	1730.72	18	1.7	577.916	3	62.77	5990000	2	13049	1	868	885			89.23	3	6950000	3	2	7	102975	PREDICTED: atrial natriuretic peptide-converting enzyme isoform X1 [CrassOstrea edulis gigas]
HorA	762155038	D.GC(+57.02)QGDS(-18.01)GGPL.L	N	38.14	928.371	10	0.3	465.193	2	50.09	0	2	10320	1	871	880	Carbamidomethylation; Dehydration	C2:Carbamidomethylation:1000.00;S6:Dehydration:0.00	89.23	3	6950000	3	2	7	102975	PREDICTED: atrial natriuretic peptide-converting enzyme isoform X1 [CrassOstrea edulis gigas]
HorA	762155038	D.GC(+57.02)QGDSGGPL.L	N	35.78	946.381	10	-1.3	474.197	2	49.87	684000000	2	10273	4	871	880	Carbamidomethylation	C2:Carbamidomethylation:1000.00	89.23	3	6950000	3	2	7	102975	PREDICTED: atrial natriuretic peptide-converting enzyme isoform X1 [CrassOstrea edulis gigas]
HorA	762155038	P.KDS(+79.97)VST(+79.97)TTVAS.T	Y	25.49	1254.48	11	2.3	628.248	2	69.19	960000	2	14447	1	104	114	Phosphorylation (STY)	S3:Phosphorylation (STY):0.00;T6:Phosphorylation (STY):0.00	89.23	3	6950000	3	2	7	102975	PREDICTED: atrial natriuretic peptide-converting enzyme isoform X1 [CrassOstrea edulis gigas]
HorA	556102326	I.C(+57.02)AGGPGVDSC(+57.02)QGDSGGPL.F	Y	38	1689.67	18	5.9	845.848	2	54.89	24600000	2	11348	2	85	102	Carbamidomethylation	C1:Carbamidomethylation:1000.00;C10:Carbamidomethylation:1000.00	87.14	11	122000000	5	4	7	17457	hypothetical protein LOTGIDRAFT_122304 partial [Lottia gigantea]
HorA	556102326	D.S(+42.01)(+79.97)C(+57.02)QGDSGGPL.F	N	35.23	1098.37	10	7.9	550.196	2	58.49	7540000	2	12123	2	93	102	Acetylation (N-term); Phosphorylation (STY); Carbamidomethylation	S1:Acetylation (N-term):1000.00;S1:Phosphorylation (STY):43.82;C2:Carbamidomethylation:1000.00	87.14	11	122000000	5	4	7	17457	hypothetical protein LOTGIDRAFT_122304 partial [Lottia gigantea]
HorA	556102326	G.PGVD(+43.99)SC(+57.02)QGDSGGPL.F	Y	34.52	1388.55	14	2.3	695.284	2	20.05	0	2	3824	1	89	102	Carboxylation (DKW); Carbamidomethylation	D4:Carboxylation (DKW):13.97;C6:Carbamidomethylation:1000.00	87.14	11	122000000	5	4	7	17457	hypothetical protein LOTGIDRAFT_122304 partial [Lottia gigantea]
HorA	556102326	G.V(+88.00)DSC(+57.02)QGDSGGPL.F	Y	32.99	1278.49	12	7.4	640.255	2	52.86	96700000	2	10913	1	91	102	3-sulfanylpropanoyl; Carbamidomethylation	V1:3-sulfanylpropanoyl:1000.00;C4:Carbamidomethylation:1000.00	87.14	11	122000000	5	4	7	17457	hypothetical protein LOTGIDRAFT_122304 partial [Lottia gigantea]
HorA	556102326	G.GPGVDS(+121.04)C(+57.02)QGDSGGPL.F	Y	30.41	1522.62	15	-3.9	762.313	2	44.12	631000	2	9029	1	88	102	Phosphorylation to pyridyl thiol; Carbamidomethylation	S6:Phosphorylation to pyridyl thiol:39.44;C7:Carbamidomethylation:1000.00	87.14	11	122000000	5	4	7	17457	hypothetical protein LOTGIDRAFT_122304 partial [Lottia gigantea]
HorA	676468566	I.C(+57.02)AGGPGVDSC(+57.02)QGDSGGPL.F	Y	38	1689.67	18	5.9	845.848	2	54.89	24600000	2	11348	2	85	102	Carbamidomethylation	C1:Carbamidomethylation:1000.00;C10:Carbamidomethylation:1000.00	87.14	11	122000000	5	4	7	17457	hypothetical protein LOTGIDRAFT_122304 partial [Lottia gigantea]
HorA	676468566	D.S(+42.01)(+79.97)C(+57.02)QGDSGGPL.F	N	35.23	1098.37	10	7.9	550.196	2	58.49	7540000	2	12123	2	93	102	Acetylation (N-term); Phosphorylation (STY); Carbamidomethylation	S1:Acetylation (N-term):1000.00;S1:Phosphorylation (STY):43.82;C2:Carbamidomethylation:1000.00	87.14	11	122000000	5	4	7	17457	hypothetical protein LOTGIDRAFT_122304 partial [Lottia gigantea]
HorA	676468566	G.PGVD(+43.99)SC(+57.02)QGDSGGPL.F	Y	34.52	1388.55	14	2.3	695.284	2	20.05	0	2	3824	1	89	102	Carboxylation (DKW); Carbamidomethylation	D4:Carboxylation (DKW):13.97;C6:Carbamidomethylation:1000.00	87.14	11	122000000	5	4	7	17457	hypothetical protein LOTGIDRAFT_122304 partial [Lottia gigantea]
HorA	676468566	G.V(+88.00)DSC(+57.02)QGDSGGPL.F	Y	32.99	1278.49	12	7.4	640.255	2	52.86	96700000	2	10913	1	91	102	3-sulfanylpropanoyl; Carbamidomethylation	V1:3-sulfanylpropanoyl:1000.00;C4:Carbamidomethylation:1000.00	87.14	11	122000000	5	4	7	17457	hypothetical protein LOTGIDRAFT_122304 partial [Lottia gigantea]
HorA	676468566	G.GPGVDS(+121.04)C(+57.02)QGDSGGPL.F	Y	30.41	1522.62	15	-3.9	762.313	2	44.12	631000	2	9029	1	88	102	Phosphorylation to pyridyl thiol; Carbamidomethylation	S6:Phosphorylation to pyridyl thiol:39.44;C7:Carbamidomethylation:1000.00	87.14	11	122000000	5	4	7	17457	hypothetical protein LOTGIDRAFT_122304 partial [Lottia gigantea]
HorA	1066738505	D.A(+43.01)C(+57.02)QGDSGGPL.M	N	38.54	1003.4	10	-0.5	502.709	2	50.69	207000000	1	10376	5	299	308	Carbamylation; Carbamidomethylation	A1:Carbamylation:1000.00;C2:Carbamidomethylation:1000.00	86.6	8	17400000	4	3	13	40522	hypothetical protein partial [Arion vulgaris]
HorA	1066738505	D.A(+362.14)C(+57.02)QGDSGGPL.M	N	34.7	1322.53	10	-0.3	662.274	2	36.59	12300000	2	7394	3	299	308	Nucleophilic addtion to cytopiloyne; Carbamidomethylation	A1:Nucleophilic addtion to cytopiloyne:51.00;C2:Carbamidomethylation:1000.00	86.6	8	17400000	4	3	13	40522	hypothetical protein partial [Arion vulgaris]
HorA	1066738505	L.C(+57.02)(+42.01)AAVGISGEDAC(+57.02)Q(+.98)GDSGGPL.M	Y	34.12	1962.79	20	1.2	982.405	2	61.36	679000	2	12749	1	289	308	Carbamidomethylation; Acetylation (N-term); Deamidation (NQ)	C1:Carbamidomethylation:1000.00;C1:Acetylation (N-term):1000.00;C12:Carbamidomethylation:1000.00;Q13:Deamidation (NQ):1000.00	86.6	8	17400000	4	3	13	40522	hypothetical protein partial [Arion vulgaris]
HorA	1066738505	G.I(+42.01)SGEDAC(+57.02)QGDSGGPL.M	Y	31.88	1503.61	15	2.5	752.817	2	57.83	1490000	1	11896	1	294	308	Acetylation (N-term); Carbamidomethylation	I1:Acetylation (N-term):1000.00;C7:Carbamidomethylation:1000.00	86.6	8	17400000	4	3	13	40522	hypothetical protein partial [Arion vulgaris]
HorA	1066738505	L.C(+57.02)AAVGISGEDAC(+57.02)QGDSGGPL.M	Y	30.4	1919.8	20	-6.1	960.901	2	64.43	6950000	1	13296	1	289	308	Carbamidomethylation	C1:Carbamidomethylation:1000.00;C12:Carbamidomethylation:1000.00	86.6	8	17400000	4	3	13	40522	hypothetical protein partial [Arion vulgaris]
HorA	1066738505	L.C(+57.02)(+43.01)AAVGISGEDAC(+57.02)QGDSGGPL.M	Y	28.6	1962.8	20	-3.9	982.406	2	61.19	2590000	1	12610	1	289	308	Carbamidomethylation; Carbamylation	C1:Carbamidomethylation:1000.00;C1:Carbamylation:1000.00;C12:Carbamidomethylation:1000.00	86.6	8	17400000	4	3	13	40522	hypothetical protein partial [Arion vulgaris]
HorA	1066738505	K.HTC(+57.02)GASLIA(+28.03).P	Y	26.61	956.475	9	1.1	479.245	2	57.27	5680000	1	11778	1	125	133	Carbamidomethylation; Ethylation	C3:Carbamidomethylation:1000.00;A9:Ethylation:63.64	86.6	8	17400000	4	3	13	40522	hypothetical protein partial [Arion vulgaris]
HorA	762150330	E.GRSAC(+57.02)NGDSGGPL.V	Y	40.41	1246.54	13	0.1	624.275	2	31.81	635000000	2	6362	9	232	244	Carbamidomethylation	C5:Carbamidomethylation:1000.00	84.64	7	696000000	4	2	18	30620	PREDICTED: fibrinolytic enzyme isozyme C [CrassOstrea edulis gigas]
HorA	762150330	E.GRSAC(+57.02)NGDSGGPL(+21.98).V	Y	34.71	1268.52	13	-1.8	635.265	2	31.92	3480000	2	6386	1	232	244	Carbamidomethylation; Sodium adduct	C5:Carbamidomethylation:1000.00;L13:Sodium adduct:42.97	84.64	7	696000000	4	2	18	30620	PREDICTED: fibrinolytic enzyme isozyme C [CrassOstrea edulis gigas]
HorA	762150330	E.GR(+44.03)SAC(+57.02)NGDSGGPL.V	Y	32.97	1290.56	13	-0.2	646.288	2	31.66	39500000	2	6330	2	232	244	Ethanolation (KR); Carbamidomethylation	R2:Ethanolation (KR):1000.00;C5:Carbamidomethylation:1000.00	84.64	7	696000000	4	2	18	30620	PREDICTED: fibrinolytic enzyme isozyme C [CrassOstrea edulis gigas]
HorA	762150330	E.GRSAC(+57.02)N(+.98)GDSGGPL.V	Y	32.5	1247.52	13	-0.3	624.767	2	36.03	15200000	1	7251	2	232	244	Carbamidomethylation; Deamidation (NQ)	C5:Carbamidomethylation:1000.00;N6:Deamidation (NQ):1000.00	84.64	7	696000000	4	2	18	30620	PREDICTED: fibrinolytic enzyme isozyme C [CrassOstrea edulis gigas]
HorA	762150330	S.ACNGDSGGPL.V	N	32.41	889.36	10	-1.3	445.687	2	49.96	16400000	2	10293	1	235	244			84.64	7	696000000	4	2	18	30620	PREDICTED: fibrinolytic enzyme isozyme C [CrassOstrea edulis gigas]
HorA	762150330	A.C(+57.02)NGD(-18.01)SGGPL.V	N	27.24	857.334	9	-1.1	429.674	2	51.35	8250000	2	10589	1	236	244	Carbamidomethylation; Dehydration	C1:Carbamidomethylation:1000.00;D4:Dehydration:17.01	84.64	7	696000000	4	2	18	30620	PREDICTED: fibrinolytic enzyme isozyme C [CrassOstrea edulis gigas]
HorA	762150330	E.GRSACNGDSGGPL.V	Y	27	1189.51	13	2.5	595.766	2	51.87	3100000	2	10704	1	232	244			84.64	7	696000000	4	2	18	30620	PREDICTED: fibrinolytic enzyme isozyme C [CrassOstrea edulis gigas]
HorA	762150330	C.NGDSGGPLVC(+57.02)K(+42.02)DNG.A	Y	26.06	1430.62	14	6	716.322	2	73.99	0	2	15494	1	237	250	Carbamidomethylation; Guanidination	C10:Carbamidomethylation:1000.00;K11:Guanidination:1000.00	84.64	7	696000000	4	2	18	30620	PREDICTED: fibrinolytic enzyme isozyme C [CrassOstrea edulis gigas]
HorA	405968171	E.GRSAC(+57.02)NGDSGGPL.V	Y	40.41	1246.54	13	0.1	624.275	2	31.81	635000000	2	6362	9	218	230	Carbamidomethylation	C5:Carbamidomethylation:1000.00	84.64	7	696000000	4	2	18	29043	Chymotrypsin-like elastase family member 1 [CrassOstrea edulis gigas]
HorA	405968171	E.GRSAC(+57.02)NGDSGGPL(+21.98).V	Y	34.71	1268.52	13	-1.8	635.265	2	31.92	3480000	2	6386	1	218	230	Carbamidomethylation; Sodium adduct	C5:Carbamidomethylation:1000.00;L13:Sodium adduct:42.97	84.64	7	696000000	4	2	18	29043	Chymotrypsin-like elastase family member 1 [CrassOstrea edulis gigas]
HorA	405968171	E.GR(+44.03)SAC(+57.02)NGDSGGPL.V	Y	32.97	1290.56	13	-0.2	646.288	2	31.66	39500000	2	6330	2	218	230	Ethanolation (KR); Carbamidomethylation	R2:Ethanolation (KR):1000.00;C5:Carbamidomethylation:1000.00	84.64	7	696000000	4	2	18	29043	Chymotrypsin-like elastase family member 1 [CrassOstrea edulis gigas]
HorA	405968171	E.GRSAC(+57.02)N(+.98)GDSGGPL.V	Y	32.5	1247.52	13	-0.3	624.767	2	36.03	15200000	1	7251	2	218	230	Carbamidomethylation; Deamidation (NQ)	C5:Carbamidomethylation:1000.00;N6:Deamidation (NQ):1000.00	84.64	7	696000000	4	2	18	29043	Chymotrypsin-like elastase family member 1 [CrassOstrea edulis gigas]
HorA	405968171	S.ACNGDSGGPL.V	N	32.41	889.36	10	-1.3	445.687	2	49.96	16400000	2	10293	1	221	230			84.64	7	696000000	4	2	18	29043	Chymotrypsin-like elastase family member 1 [CrassOstrea edulis gigas]
HorA	405968171	A.C(+57.02)NGD(-18.01)SGGPL.V	N	27.24	857.334	9	-1.1	429.674	2	51.35	8250000	2	10589	1	222	230	Carbamidomethylation; Dehydration	C1:Carbamidomethylation:1000.00;D4:Dehydration:17.01	84.64	7	696000000	4	2	18	29043	Chymotrypsin-like elastase family member 1 [CrassOstrea edulis gigas]
HorA	405968171	E.GRSACNGDSGGPL.V	Y	27	1189.51	13	2.5	595.766	2	51.87	3100000	2	10704	1	218	230			84.64	7	696000000	4	2	18	29043	Chymotrypsin-like elastase family member 1 [CrassOstrea edulis gigas]
HorA	405968171	C.NGDSGGPLVC(+57.02)K(+42.02)DNG.A	Y	26.06	1430.62	14	6	716.322	2	73.99	0	2	15494	1	223	236	Carbamidomethylation; Guanidination	C10:Carbamidomethylation:1000.00;K11:Guanidination:1000.00	84.64	7	696000000	4	2	18	29043	Chymotrypsin-like elastase family member 1 [CrassOstrea edulis gigas]
HorA	524869836	C.AVAQ(+.98)DASTC(+57.02)SGDSGGPL.V	Y	33.87	1592.66	17	1.6	797.34	2	37.86	2860000	2	7671	1	235	251	Deamidation (NQ); Carbamidomethylation	Q4:Deamidation (NQ):1000.00;C9:Carbamidomethylation:1000.00	83.24	6	501000000	5	5	12	32414	PREDICTED: chymotrypsin A-like [Aplysia californica]
HorA	524869836	D.AS(+114.04)TC(+57.02)SGDSGGPL.V	Y	33.17	1221.49	12	-5.8	611.75	2	35.81	408000000	2	7229	4	240	251	Ubiquitin; Carbamidomethylation	S2:Ubiquitin:0.00;C4:Carbamidomethylation:1000.00	83.24	6	501000000	5	5	12	32414	PREDICTED: chymotrypsin A-like [Aplysia californica]
HorA	524869836	A.STC(+57.02)S(+86.00)GDSGGPL.V	Y	31.21	1122.41	11	-4.9	562.211	2	39.82	15500000	2	8099	1	241	251	Carbamidomethylation; Malonylation	C3:Carbamidomethylation:1000.00;S4:Malonylation:5.08	83.24	6	501000000	5	5	12	32414	PREDICTED: chymotrypsin A-like [Aplysia californica]
HorA	524869836	Q.D(+119.04)ASTC(+57.02)SGDSGGPL.V	Y	30.84	1341.51	13	-1.6	671.763	2	42.77	0	2	8736	1	239	251	Pyridylacetyl; Carbamidomethylation	D1:Pyridylacetyl:1000.00;C5:Carbamidomethylation:1000.00	83.24	6	501000000	5	5	12	32414	PREDICTED: chymotrypsin A-like [Aplysia californica]
HorA	524869836	A.S(+100.02)TC(+57.02)SGDSGGPL.V	Y	29.41	1136.43	11	-4.1	569.22	2	36.43	5530000	2	7360	1	241	251	Methylmalonylation on Serine; Carbamidomethylation	S1:Methylmalonylation on Serine:0.00;C3:Carbamidomethylation:1000.00	83.24	6	501000000	5	5	12	32414	PREDICTED: chymotrypsin A-like [Aplysia californica]
HorA	524869836	A.VAQ(+.98)DASTC(+57.02)SGDSGGPL.V	Y	29.21	1521.63	16	0.9	761.821	2	38.86	68700000	2	7892	2	236	251	Deamidation (NQ); Carbamidomethylation	Q3:Deamidation (NQ):1000.00;C8:Carbamidomethylation:1000.00	83.24	6	501000000	5	5	12	32414	PREDICTED: chymotrypsin A-like [Aplysia californica]
HorA	524869836	D.AST(+114.04)C(+57.02)SGDSGGPL.V	Y	28.96	1221.49	12	-4.2	611.751	2	36.44	0	1	7336	1	240	251	Ubiquitin; Carbamidomethylation	T3:Ubiquitin:0.00;C4:Carbamidomethylation:1000.00	83.24	6	501000000	5	5	12	32414	PREDICTED: chymotrypsin A-like [Aplysia californica]
HorA	524869836	D.ASTC(+57.02)S(+114.04)GDSGGPL.V	Y	27.62	1221.49	12	-7.1	611.75	2	39.32	932000	2	7992	1	240	251	Carbamidomethylation; Ubiquitin	C4:Carbamidomethylation:1000.00;S5:Ubiquitin:3.64	83.24	6	501000000	5	5	12	32414	PREDICTED: chymotrypsin A-like [Aplysia californica]
HorA	871215018	S.SGC(+57.02)QGDSGGPL.V	N	38.54	1033.41	11	-2.2	517.713	2	50.4	25000000	2	10387	2	190	200	Carbamidomethylation	C3:Carbamidomethylation:1000.00	81.16	6	46500000	4	2	12	26443	PREDICTED: trypsin-like [Aplysia californica]
HorA	871215018	S.GC(+57.02)QGDS(-18.01)GGPL.V	N	38.14	928.371	10	0.3	465.193	2	50.09	0	2	10320	1	191	200	Carbamidomethylation; Dehydration	C2:Carbamidomethylation:1000.00;S6:Dehydration:0.00	81.16	6	46500000	4	2	12	26443	PREDICTED: trypsin-like [Aplysia californica]
HorA	871215018	S.GC(+57.02)QGDSGGPL.V	N	35.78	946.381	10	-1.3	474.197	2	49.87	684000000	2	10273	4	191	200	Carbamidomethylation	C2:Carbamidomethylation:1000.00	81.16	6	46500000	4	2	12	26443	PREDICTED: trypsin-like [Aplysia californica]
HorA	871215018	V.SSGC(+57.02)QGD(+31.97)SGGPL.V	Y	31.11	1152.42	12	0.4	577.216	2	39.89	29300000	1	8073	2	189	200	Carbamidomethylation; Persulfide	C4:Carbamidomethylation:1000.00;D7:Persulfide:1000.00	81.16	6	46500000	4	2	12	26443	PREDICTED: trypsin-like [Aplysia californica]
HorA	871215018	S.SGC(+57.02)QGD(+31.97)SGGPL.V	N	30.51	1065.39	11	0.3	533.7	2	39.95	7940000	1	8085	1	190	200	Carbamidomethylation; Persulfide	C3:Carbamidomethylation:1000.00;D6:Persulfide:1000.00	81.16	6	46500000	4	2	12	26443	PREDICTED: trypsin-like [Aplysia californica]
HorA	871215018	S.SGC(+57.02)QGDSGGPL(+17.03).V	N	29	1050.44	11	-0.6	526.227	2	50.41	10000000	2	10388	1	190	200	Carbamidomethylation; Replacement of proton with ammonium ion	C3:Carbamidomethylation:1000.00;L11:Replacement of proton with ammonium ion:0.00	81.16	6	46500000	4	2	12	26443	PREDICTED: trypsin-like [Aplysia californica]
HorA	871215018	S.SVSS(+86.00)GC(+57.02)QGDSGGPL.V	Y	25.76	1392.55	14	-6.7	697.276	2	53.56	17200000	2	11067	1	187	200	Malonylation; Carbamidomethylation	S4:Malonylation:8.69;C6:Carbamidomethylation:1000.00	81.16	6	46500000	4	2	12	26443	PREDICTED: trypsin-like [Aplysia californica]
HorA	1242760471	D.GC(+57.02)QGDS(-18.01)GGPL.L	N	38.14	928.371	10	0.3	465.193	2	50.09	0	2	10320	1	857	866	Carbamidomethylation; Dehydration	C2:Carbamidomethylation:1000.00;S6:Dehydration:0.00	79.47	4	108000000	4	3	12	101580	atrial natriuretic peptide-converting enzyme-like isoform X2 [CrassOstrea edulis virginica]
HorA	1242760471	D.GC(+57.02)QGDSGGPL.L	N	35.78	946.381	10	-1.3	474.197	2	49.87	684000000	2	10273	4	857	866	Carbamidomethylation	C2:Carbamidomethylation:1000.00	79.47	4	108000000	4	3	12	101580	atrial natriuretic peptide-converting enzyme-like isoform X2 [CrassOstrea edulis virginica]
HorA	1242760471	S.AQ(+.98)RKDT(+79.97)TYT.N	Y	30.53	1163.49	9	2.2	582.751	2	38.67	78900000	2	7850	5	84	92	Deamidation (NQ); Phosphorylation (STY)	Q2:Deamidation (NQ):1000.00;T6:Phosphorylation (STY):0.00	79.47	4	108000000	4	3	12	101580	atrial natriuretic peptide-converting enzyme-like isoform X2 [CrassOstrea edulis virginica]
HorA	1242760471	A.LGHTTLAEVS(+79.97).V	Y	27.14	1106.5	10	-0.2	554.258	2	69.32	149000	2	14476	1	264	273	Phosphorylation (STY)	S10:Phosphorylation (STY):5.14	79.47	4	108000000	4	3	12	101580	atrial natriuretic peptide-converting enzyme-like isoform X2 [CrassOstrea edulis virginica]
HorA	1242760471	G.GITISVGDTRR(+21.98).L	Y	26.26	1195.63	11	2	598.823	2	56.93	29300000	1	11702	1	724	734	Sodium adduct	R11:Sodium adduct:24.24	79.47	4	108000000	4	3	12	101580	atrial natriuretic peptide-converting enzyme-like isoform X2 [CrassOstrea edulis virginica]
HorA	1242760469	D.GC(+57.02)QGDS(-18.01)GGPL.L	N	38.14	928.371	10	0.3	465.193	2	50.09	0	2	10320	1	868	877	Carbamidomethylation; Dehydration	C2:Carbamidomethylation:1000.00;S6:Dehydration:0.00	79.47	4	108000000	4	3	12	103129	atrial natriuretic peptide-converting enzyme-like isoform X1 [CrassOstrea edulis virginica]
HorA	1242760469	D.GC(+57.02)QGDSGGPL.L	N	35.78	946.381	10	-1.3	474.197	2	49.87	684000000	2	10273	4	868	877	Carbamidomethylation	C2:Carbamidomethylation:1000.00	79.47	4	108000000	4	3	12	103129	atrial natriuretic peptide-converting enzyme-like isoform X1 [CrassOstrea edulis virginica]
HorA	1242760469	S.AQ(+.98)RKDT(+79.97)TYT.N	Y	30.53	1163.49	9	2.2	582.751	2	38.67	78900000	2	7850	5	95	103	Deamidation (NQ); Phosphorylation (STY)	Q2:Deamidation (NQ):1000.00;T6:Phosphorylation (STY):0.00	79.47	4	108000000	4	3	12	103129	atrial natriuretic peptide-converting enzyme-like isoform X1 [CrassOstrea edulis virginica]
HorA	1242760469	A.LGHTTLAEVS(+79.97).V	Y	27.14	1106.5	10	-0.2	554.258	2	69.32	149000	2	14476	1	275	284	Phosphorylation (STY)	S10:Phosphorylation (STY):5.14	79.47	4	108000000	4	3	12	103129	atrial natriuretic peptide-converting enzyme-like isoform X1 [CrassOstrea edulis virginica]
HorA	1242760469	G.GITISVGDTRR(+21.98).L	Y	26.26	1195.63	11	2	598.823	2	56.93	29300000	1	11702	1	735	745	Sodium adduct	R11:Sodium adduct:24.24	79.47	4	108000000	4	3	12	103129	atrial natriuretic peptide-converting enzyme-like isoform X1 [CrassOstrea edulis virginica]
HorA	1242758639	L.HS(-18.01)VDREIT.K	Y	48.11	937.462	8	-0.9	469.738	2	29.36	31300000	1	5823	2	49	56	Dehydration	S2:Dehydration:40.00	61.93	5	72700000	2	2	6	19592	uncharacterized protein LOC111121399 isoform X2 [CrassOstrea edulis virginica]
HorA	1242758639	L.HSVDREIT.K	Y	47.5	955.472	8	0.4	478.744	2	23.11	27300000	2	4482	2	49	56			61.93	5	72700000	2	2	6	19592	uncharacterized protein LOC111121399 isoform X2 [CrassOstrea edulis virginica]
HorA	1242758639	H.SVDREIT.K	Y	27.64	818.413	7	-1.5	410.213	2	31.59	8960000	2	6316	1	50	56			61.93	5	72700000	2	2	6	19592	uncharacterized protein LOC111121399 isoform X2 [CrassOstrea edulis virginica]
HorA	1242758639	L.H(+71.04)SVDREIT.K	Y	25.59	1026.51	8	0.3	514.262	2	17.76	5060000	2	3338	1	49	56	Propionamide (K X@N-term)	H1:Propionamide (K X@N-term):1000.00	61.93	5	72700000	2	2	6	19592	uncharacterized protein LOC111121399 isoform X2 [CrassOstrea edulis virginica]
HorA	1242758637	L.HS(-18.01)VDREIT.K	Y	48.11	937.462	8	-0.9	469.738	2	29.36	31300000	1	5823	2	49	56	Dehydration	S2:Dehydration:40.00	61.93	3	72700000	2	2	6	31521	uncharacterized protein LOC111121399 isoform X1 [CrassOstrea edulis virginica]
HorA	1242758637	L.HSVDREIT.K	Y	47.5	955.472	8	0.4	478.744	2	23.11	27300000	2	4482	2	49	56			61.93	3	72700000	2	2	6	31521	uncharacterized protein LOC111121399 isoform X1 [CrassOstrea edulis virginica]
HorA	1242758637	H.SVDREIT.K	Y	27.64	818.413	7	-1.5	410.213	2	31.59	8960000	2	6316	1	50	56			61.93	3	72700000	2	2	6	31521	uncharacterized protein LOC111121399 isoform X1 [CrassOstrea edulis virginica]
HorA	1242758637	L.H(+71.04)SVDREIT.K	Y	25.59	1026.51	8	0.3	514.262	2	17.76	5060000	2	3338	1	49	56	Propionamide (K X@N-term)	H1:Propionamide (K X@N-term):1000.00	61.93	3	72700000	2	2	6	31521	uncharacterized protein LOC111121399 isoform X1 [CrassOstrea edulis virginica]
HorA	1242759060	L.HS(-18.01)VDREIT.K	Y	48.11	937.462	8	-0.9	469.738	2	29.36	31300000	1	5823	2	49	56	Dehydration	S2:Dehydration:40.00	61.93	3	72700000	2	2	6	34575	uncharacterized protein LOC111121569 [CrassOstrea edulis virginica]
HorA	1242759060	L.HSVDREIT.K	Y	47.5	955.472	8	0.4	478.744	2	23.11	27300000	2	4482	2	49	56			61.93	3	72700000	2	2	6	34575	uncharacterized protein LOC111121569 [CrassOstrea edulis virginica]
HorA	1242759060	H.SVDREIT.K	Y	27.64	818.413	7	-1.5	410.213	2	31.59	8960000	2	6316	1	50	56			61.93	3	72700000	2	2	6	34575	uncharacterized protein LOC111121569 [CrassOstrea edulis virginica]
HorA	1242759060	L.H(+71.04)SVDREIT.K	Y	25.59	1026.51	8	0.3	514.262	2	17.76	5060000	2	3338	1	49	56	Propionamide (K X@N-term)	H1:Propionamide (K X@N-term):1000.00	61.93	3	72700000	2	2	6	34575	uncharacterized protein LOC111121569 [CrassOstrea edulis virginica]
HorB	472820235	G.LSSSGGK(+14.02)DAC(+57.02)QGDSGGPL.I	Y	48.55	1705.76	18	-6.1	853.881	2	54.74	9760000	2	11324	2	270	287	Methylation(KR); Carbamidomethylation	K7:Methylation(KR):1000.00;C10:Carbamidomethylation:1000.00	134.33	8	904000000	10	9	26	35912	serine protease [Sinonovacula constricta]
HorB	472820235	S.GGKD(+55.92)AC(+57.02)QGDSGGPL.I	Y	47.75	1373.48	14	0.2	687.748	2	52.1	8870000	2	10762	1	274	287	Replacement of 2 protons by nickel; Carbamidomethylation	D4:Replacement of 2 protons by nickel:25.58;C6:Carbamidomethylation:1000.00	134.33	8	904000000	10	9	26	35912	serine protease [Sinonovacula constricta]
HorB	472820235	S.SSGGK(+44.03)DAC(+57.02)QGDSGGPL.I	Y	45.34	1535.65	16	-3.1	768.831	2	36.71	5550000	2	7404	1	272	287	Ethanolation (KR); Carbamidomethylation	K5:Ethanolation (KR):1000.00;C8:Carbamidomethylation:1000.00	134.33	8	904000000	10	9	26	35912	serine protease [Sinonovacula constricta]
HorB	472820235	D.A(+362.14)C(+57.02)QGDSGGPL.I	Y	44.87	1322.53	10	0.5	662.274	2	24.43	6160000	2	4758	2	278	287	Nucleophilic addtion to cytopiloyne; Carbamidomethylation	A1:Nucleophilic addtion to cytopiloyne:51.34;C2:Carbamidomethylation:1000.00	134.33	8	904000000	10	9	26	35912	serine protease [Sinonovacula constricta]
HorB	472820235	A.GLSSSGGK(+44.03)DAC(+57.02)QGDSGGPL.I	Y	44.4	1792.79	19	-1.8	897.4	2	56.8	50300000	2	11763	3	269	287	Ethanolation (KR); Carbamidomethylation	K8:Ethanolation (KR):1000.00;C11:Carbamidomethylation:1000.00	134.33	8	904000000	10	9	26	35912	serine protease [Sinonovacula constricta]
HorB	472820235	G.LSSSGGK(+44.03)DAC(+57.02)QGDSGGPL.I	Y	42.65	1735.77	18	-5.4	868.887	2	54.71	299000000	2	11318	2	270	287	Ethanolation (KR); Carbamidomethylation	K7:Ethanolation (KR):1000.00;C10:Carbamidomethylation:1000.00	134.33	8	904000000	10	9	26	35912	serine protease [Sinonovacula constricta]
HorB	472820235	D.A(+43.01)C(+57.02)QGDSGGPL.I	Y	42.62	1003.4	10	0.2	502.709	2	51.78	6810000	2	10694	2	278	287	Carbamylation; Carbamidomethylation	A1:Carbamylation:1000.00;C2:Carbamidomethylation:1000.00	134.33	8	904000000	10	9	26	35912	serine protease [Sinonovacula constricta]
HorB	472820235	L.SSSGGK(+111.03)DAC(+57.02)QGDSGGPL.I	Y	40.26	1689.69	17	-3	845.85	2	55.21	54100000	2	11425	1	271	287	Nmethylmaleimide; Carbamidomethylation	K6:Nmethylmaleimide:1000.00;C9:Carbamidomethylation:1000.00	134.33	8	904000000	10	9	26	35912	serine protease [Sinonovacula constricta]
HorB	472820235	S.SGGKD(+31.97)AC(+57.02)QGDSGGPL.I	Y	36.95	1436.57	15	-0.4	719.29	2	53.11	397000000	2	10976	2	273	287	Persulfide; Carbamidomethylation	D5:Persulfide:23.70;C7:Carbamidomethylation:1000.00	134.33	8	904000000	10	9	26	35912	serine protease [Sinonovacula constricta]
HorB	472820235	L.SSSGGK(+14.02)DAC(+57.02)QGDSGGPL.I	Y	36.93	1592.67	17	-3	797.342	2	37.2	1770000	2	7510	1	271	287	Methylation(KR); Carbamidomethylation	K6:Methylation(KR):1000.00;C9:Carbamidomethylation:1000.00	134.33	8	904000000	10	9	26	35912	serine protease [Sinonovacula constricta]
HorB	472820235	G.LSSSGGKDAC(+57.02)QGDSGGPL.I	Y	36.06	1691.74	18	-4.4	846.875	2	55.37	8280000	2	11459	1	270	287	Carbamidomethylation	C10:Carbamidomethylation:1000.00	134.33	8	904000000	10	9	26	35912	serine protease [Sinonovacula constricta]
HorB	472820235	I.C(+57.02)AGLSSS(+238.23)GGKDAC(+57.02)QGDSGGPL.I	Y	35.8	2218.06	21	-1.6	740.36	3	42.77	8560000	2	8727	3	267	287	Carbamidomethylation; Palmitoylation	C1:Carbamidomethylation:1000.00;S7:Palmitoylation:0.00;C13:Carbamidomethylation:1000.00	134.33	8	904000000	10	9	26	35912	serine protease [Sinonovacula constricta]
HorB	472820235	S.S(+134.05)GGKDAC(+57.02)QGDSGGPL.I	Y	34.21	1538.64	15	0.9	770.329	2	35.21	2760000	2	7081	1	273	287	3-methyl-2-pyridyl isocyanate; Carbamidomethylation	S1:3-methyl-2-pyridyl isocyanate:1000.00;C7:Carbamidomethylation:1000.00	134.33	8	904000000	10	9	26	35912	serine protease [Sinonovacula constricta]
HorB	472820235	G.LSSSGGK(+87.03)DAC(+57.02)QGDSGGPL.I	Y	32.08	1778.77	18	2.8	593.934	3	27.97	12300000	2	5522	1	270	287	Glycidamide adduct; Carbamidomethylation	K7:Glycidamide adduct:13.13;C10:Carbamidomethylation:1000.00	134.33	8	904000000	10	9	26	35912	serine protease [Sinonovacula constricta]
HorB	472820235	G.K(+87.03)DAC(+57.02)QGDSGGPL.I	Y	31.18	1290.55	12	9	646.289	2	31.38	33500000	2	6257	1	276	287	Glycidamide adduct; Carbamidomethylation	K1:Glycidamide adduct:1000.00;C4:Carbamidomethylation:1000.00	134.33	8	904000000	10	9	26	35912	serine protease [Sinonovacula constricta]
HorB	472820235	V.C(+58.01)GGTLI.S	N	30.93	620.284	6	-0.3	621.291	1	75.48	2330000	2	15847	1	119	124	Carboxymethyl	C1:Carboxymethyl:1000.00	134.33	8	904000000	10	9	26	35912	serine protease [Sinonovacula constricta]
HorB	472820235	V.CGGTLI.S	N	29.56	562.279	6	-1.2	563.285	1	91.15	391000	1	20064	1	119	124			134.33	8	904000000	10	9	26	35912	serine protease [Sinonovacula constricta]
HorB	476538091	L.TENGK(+28.03)TTC(+57.02)QGDSGGPL.M	Y	48.35	1648.74	16	-4.9	825.371	2	54.64	19900000	2	11304	1	196	211	Dimethylation(KR); Carbamidomethylation	K5:Dimethylation(KR):1000.00;C8:Carbamidomethylation:1000.00	109.06	7	214000000	6	6	11	27055	SP1-Sep-3 [Sepia latimanus]
HorB	476538091	E.NGK(+188.03)TTC(+57.02)QGDSGGPL.M	Y	42.34	1578.65	14	1	790.332	2	38.69	9620000	2	7838	1	198	211	Lipoyl; Carbamidomethylation	K3:Lipoyl:1000.00;C6:Carbamidomethylation:1000.00	109.06	7	214000000	6	6	11	27055	SP1-Sep-3 [Sepia latimanus]
HorB	476538091	N.GK(+188.03)TTC(+57.02)QGDSGGPL.M	Y	39.98	1464.6	13	3.1	733.312	2	35.08	6820000	2	7051	1	199	211	Lipoyl; Carbamidomethylation	K2:Lipoyl:1000.00;C5:Carbamidomethylation:1000.00	109.06	7	214000000	6	6	11	27055	SP1-Sep-3 [Sepia latimanus]
HorB	476538091	E.NGK(+175.04)TTC(+57.02)QGDSGGPL.M	Y	39.52	1565.66	14	-1.3	783.835	2	35.86	33100000	2	7222	1	198	211	Naphthalene-2 3-dicarboxaldehyde; Carbamidomethylation	K3:Naphthalene-2 3-dicarboxaldehyde:7.32;C6:Carbamidomethylation:1000.00	109.06	7	214000000	6	6	11	27055	SP1-Sep-3 [Sepia latimanus]
HorB	476538091	A.G(+42.01)QLTENGKTTC(+57.02)QGDSGGPL.M	Y	35.04	1960.88	19	0.4	654.634	3	58.81	4330000	2	12196	1	193	211	Acetylation (N-term); Carbamidomethylation	G1:Acetylation (N-term):1000.00;C11:Carbamidomethylation:1000.00	109.06	7	214000000	6	6	11	27055	SP1-Sep-3 [Sepia latimanus]
HorB	476538091	T.EN(+.98)GKTTC(+57.02)Q(+.98)GDSGGPL.M	Y	34.38	1521.63	15	1.7	761.821	2	38.49	21900000	2	7794	2	197	211	Deamidation (NQ); Carbamidomethylation	N2:Deamidation (NQ):1000.00;C7:Carbamidomethylation:1000.00;Q8:Deamidation (NQ):1000.00	109.06	7	214000000	6	6	11	27055	SP1-Sep-3 [Sepia latimanus]
HorB	476538091	Q.LTENGK(+229.01)TTC(+57.02)QGDSGGPL.M	Y	33.02	1962.8	17	-3.6	982.405	2	61.27	311000	2	12734	1	195	211	Pyridoxal phosphate; Carbamidomethylation	K6:Pyridoxal phosphate:1000.00;C9:Carbamidomethylation:1000.00	109.06	7	214000000	6	6	11	27055	SP1-Sep-3 [Sepia latimanus]
HorB	476538091	L.TENGK(+14.02)TTC(+57.02)QGDSGGPL.M	Y	30.51	1634.72	16	-5	545.911	3	55.07	22900000	2	11394	1	196	211	Methylation(KR); Carbamidomethylation	K5:Methylation(KR):1000.00;C8:Carbamidomethylation:1000.00	109.06	7	214000000	6	6	11	27055	SP1-Sep-3 [Sepia latimanus]
HorB	476538091	L.TENGK(+14.96)TTC(+57.02)QGDSGGPL.M	Y	28.57	1635.67	16	4.8	818.845	2	41.01	1280000	2	8347	1	196	211	Alpha-amino adipic acid; Carbamidomethylation	K5:Alpha-amino adipic acid:1000.00;C8:Carbamidomethylation:1000.00	109.06	7	214000000	6	6	11	27055	SP1-Sep-3 [Sepia latimanus]
HorB	476538091	Q.LTEN(+.98)GKTTC(+57.02)Q(+.98)GDSGGPL.M	Y	25.82	1735.76	17	2	868.888	2	55.31	93400000	2	11446	1	195	211	Deamidation (NQ); Carbamidomethylation	N4:Deamidation (NQ):1000.00;C9:Carbamidomethylation:1000.00;Q10:Deamidation (NQ):1000.00	109.06	7	214000000	6	6	11	27055	SP1-Sep-3 [Sepia latimanus]
HorB	212169038	L.TENGK(+28.03)TTC(+57.02)QGDSGGPL.M	Y	48.35	1648.74	16	-4.9	825.371	2	54.64	19900000	2	11304	1	32	47	Dimethylation(KR); Carbamidomethylation	K5:Dimethylation(KR):1000.00;C8:Carbamidomethylation:1000.00	109.06	21	214000000	6	6	11	9654	S1 type peptidase partial [Sepia latimanus]
HorB	212169038	E.NGK(+188.03)TTC(+57.02)QGDSGGPL.M	Y	42.34	1578.65	14	1	790.332	2	38.69	9620000	2	7838	1	34	47	Lipoyl; Carbamidomethylation	K3:Lipoyl:1000.00;C6:Carbamidomethylation:1000.00	109.06	21	214000000	6	6	11	9654	S1 type peptidase partial [Sepia latimanus]
HorB	212169038	N.GK(+188.03)TTC(+57.02)QGDSGGPL.M	Y	39.98	1464.6	13	3.1	733.312	2	35.08	6820000	2	7051	1	35	47	Lipoyl; Carbamidomethylation	K2:Lipoyl:1000.00;C5:Carbamidomethylation:1000.00	109.06	21	214000000	6	6	11	9654	S1 type peptidase partial [Sepia latimanus]
[truncated: 3,093 more rows]

## Sheet: "Shellomes"
		Unio pictorum			Unio crassus			Margaritifera margaritifera			Pseudunio auricularius			Modiolus modiolus			Ostrea edulis			HavA			HavB			HavC			HorA			HorB			HorC			PesB
[truncated: 151 more rows]
