# Supplementary material for: 'Palaeoshellomics’ reveals the use of freshwater mother-of-pearl in prehistory
Source: eLife journal article supplement (doi:10.7554/elife.45644), 2019-05-06
Supplement: supp [file M1. EST sequences.xlsx]

## Sheet: M1. EST sequence match
	U. pictorum 312835028	U. pictorum 312836432	U. pictorum 312834881	U. pictorum 312834327	U. pictorum 312832047	U. pictorum 262319994	U. pictorum 262320398	U. pictorum 312833977	U. pictorum 262326668	U. pictorum 312834859	U. pictorum 312832460	U. pictorum 312835631	U. pictorum 312836519	U. pictorum 312833634	U. pictorum 238638885	U. pictorum 312834873	U. pictorum 260742995	U. pictorum 312835002	U. pictorum 312834262	U. pictorum 212831670	U. pictorum 262319165	U. pictorum 262327333	U. pictorum 312831920	U. pictorum 262321105	U. pictorum 215291018	U. pictorum 212821018	U. pictorum 312836598	U. pictorum 312832625	U. pictorum 312834649	U. pictorum 312836493	U. pictorum 312832416	U. pictorum 312833463	U. pictorum 212830777	U. pictorum 312832167	U. pictorum 262329236	U. pictorum 313386164	U. pictorum 313386163	U. pictorum 313355407	U. pictorum 313355406	U. pictorum 58308563	U. pictorum 312836546	U. pictorum 312831876	U. pictorum 215287583	U. pictorum 312832269	U. pictorum 312832411	U. pictorum 262327552	U. pictorum 149775233	U. pictorum 312833548	U. pictorum 312833294
U. pictorum 312835028	1	0	0	0	0	0	0	0	0	0	0	0	0	0	0	0	0	0	0	0	0	0	0	0	0	0	0	0	0	0	0	0	0	0	0	0	0	0	0	0	0	0	0	0	0	0	0	0	0
U. pictorum 312836432	0	1	0	0	0	0	0	0	0	0	0	0	0	0	0	0	0	0	0	0	0	0	0	0	0	0	0	0	0	0	0	0	0	0	0	0	0	0	0	0	0	0	0	0	0	0	0	0	0
U. pictorum 312834881	0	0	1	0	0	0	0	0	0	0	0	0	0	0	0	0	0	0	0	0	0	0	0	0	0	0	0	0	0	0	0	0	0	0	0	0	0	0	0	0	0	0	0	0	0	0	0	0	0
U. pictorum 312834327	0	0	0	1	0	0	0	0	0	0	0	0	0	0	0	0	0	0	0	0	0	0	0	0	0	0	0	0	0	0	0	0	0	0	0	0	0	0	0	0	0	0	0	0	0	0	0	0	0
U. pictorum 312832047	0	0	0	0	1	0	0	0	0	0	0	0	0	0	0	0	0	0	0	0	0	0	0	0	0	0	0	0	0	0	0	0	0	0	0	0	0	0	0	0	0	0	0	0	0	0	0	0	0
U. pictorum 262319994	0	0	0	0	0	1	0	0	0	0	0	0	0	0	0	0	0	0	0	0	0	0	0	0	0	0	0	0	0	0	0	0	0	0	0	0	0	0	0	0	0	0	0	0	0	0	0	0	0
U. pictorum 262320398	0	0	0	0	0	0	1	0	0	0	0	0	0	0	0	0	0	0	0	0	0	0	0	0	0	0	0	0	0	0	0	0	0	0	0	0	0	0	0	0	0	0	0	0	0	0	0	0	0
U. pictorum 312833977	0	0	0	0	0	0	0	1	0	0	0	0	0	0	0	0	0	0	0	0	0	0	0	0	0	0	0	0	0	0	0	0	0	0	0	0	0	0	0	0	0	0	0	0	0	0	0	0	0
U. pictorum 262326668	0	0	0	0	0	0	0	0	1	0	0	0	0	0	0	0	0	0	0	0	0	0	0	0	0	0	0	0	0	0	0	0	0	0	0	0	0	0	0	0	0	0	0	0	0	0	0	0	0
U. pictorum 312834859	0	0	0	0	0	0	0	0	0	1	0	0	0	0	0	0	0	0	0	0	0	0	0	0	0	0	0	0	0	0	0	0	0	0	0	0	0	0	0	0	0	0	0	0	0	0	0	0	0
U. pictorum 312832460	0	0	0	0	0	0	0	0	0	0	1	0	0	0	0	0	0	0	0	0	0	0	0	0	0	0	0	0	0	0	0	0	0	0	0	0	0	0	0	0	0	0	0	0	0	0	0	0	0
U. pictorum 312835631	0	0	0	0	0	0	0	0	0	0	0	1	0	0	0	0	0	0	0	0	0	0	0	0	0	0	0	0	0	0	0	0	0	0	0	0	0	0	0	0	0	0	0	0	0	0	0	0	0
U. pictorum 312836519	0	0	0	0	0	0	0	0	0	0	0	0	1	0	0	0	0	0	0	0	0	0	0	0	0	0	0	0	0	0	0	0	0	0	0	0	0	0	0	0	0	0	0	0	0	0	0	0	0
U. pictorum 312833634	0	0	0	0	0	0	0	0	0	0	0	0	0	1	0	0	0	0	0	0	0	0	0	0	0	0	0	0	0	0	0	0	0	0	0	0	0	0	0	0	0	0	0	0	0	0	0	0	0
U. pictorum 238638885	0	0	0	0	0	0	0	0	0	0	0	0	0	0	1	0	0	0	0	0	0	0	0	0	0	0	0	0	0	0	0	0	0	0	0	0	0	0	0	0	0	0	0	0	0	0	0	0	0
U. pictorum 312834873	0	0	0	0	0	0	0	0	0	0	0	0	0	0	0	1	0	0	0	0	0	0	0	0	0	0	0	0	0	0	0	0	0	0	0	0	0	0	0	0	0	0	0	0	0	0	0	0	0
U. pictorum 260742995	0	0	0	0	0	0	0	0	0	0	0	0	0	0	0	0	1	0	0	0	0	0	0	0	0	0	0	0	0	0	0	0	0	0	0	0	0	0	0	0	0	0	0	0	0	0	0	0	0
U. pictorum 312835002	0	0	0	0	0	0	0	0	0	0	0	0	0	0	0	0	0	1	0	0	0	0	0	0	0	0	0	0	0	0	0	0	0	0	0	0	0	0	0	0	0	0	0	0	0	0	0	0	0
U. pictorum 312834262	0	0	0	0	0	0	0	0	0	0	0	0	0	0	0	0	0	0	1	0	0	0	0	0	0	0	0	0	0	0	0	0	0	0	0	0	0	0	0	0	0	0	0	0	0	0	0	0	0
U. pictorum 212831670	0	0	0	0	0	0	0	0	0	0	0	0	0	0	0	0	0	0	0	1	0	0	0	0	0	0	0	0	0	0	0	0	0	0	0	0	0	0	0	0	0	0	0	0	0	0	0	0	0
U. pictorum 262319165	0	0	0	0	0	0	0	0	0	0	0	0	0	0	0	0	0	0	0	0	1	0	0	0	0	0	0	0	0	0	0	0	0	0	0	0	0	0	0	0	0	0	0	0	0	0	0	0	0
U. pictorum 262327333	0	0	0	0	0	0	0	0	0	0	0	0	0	0	0	0	0	0	0	0	0	1	0	0	0	0	0	0	0	0	0	0	0	0	0	0	0	0	0	0	0	0	0	0	0	0	0	0	0
U. pictorum 312831920	0	0	0	0	0	0	0	0	0	0	0	0	0	0	0	0	0	0	0	0	0	0	1	0	0	0	0	0	0	0	0	0	0	0	0	0	0	0	0	0	0	0	0	0	0	0	0	0	0
U. pictorum 262321105	0	0	0	0	0	0	0	0	0	0	0	0	0	0	0	0	0	0	0	0	0	0	0	1	0	0	0	0	0	0	0	0	0	0	0	0	0	0	0	0	0	0	0	0	0	0	0	0	0
U. pictorum 215291018	0	0	0	0	0	0	0	0	0	0	0	0	0	0	0	0	0	0	0	0	0	0	0	0	1	0	0	0	0	0	0	0	0	0	0	0	0	0	0	0	0	0	0	0	0	0	0	0	0
U. pictorum 212821018	0	0	0	0	0	0	0	0	0	0	0	0	0	0	0	0	0	0	0	0	0	0	0	0	0	1	0	0	0	0	0	0	0	0	0	0	0	0	0	0	0	0	0	0	0	0	0	0	0
U. pictorum 312836598	0	0	0	0	0	0	0	0	0	0	0	0	0	0	0	0	0	0	0	0	0	0	0	0	0	0	1	0	0	0	0	0	0	0	0	0	0	0	0	0	0	0	0	0	0	0	0	0	0
U. pictorum 312832625	0	0	0	0	0	0	0	0	0	0	0	0	0	0	0	0	0	0	0	0	0	0	0	0	0	0	0	1	0	0	0	0	0	0	0	0	0	0	0	0	0	0	0	0	0	0	0	0	0
U. pictorum 312834649	0	0	0	0	0	0	0	0	0	0	0	0	0	0	0	0	0	0	0	0	0	0	0	0	0	0	0	0	1	0	0	0	0	0	0	0	0	0	0	0	0	0	0	0	0	0	0	0	0
U. pictorum 312836493	0	0	0	0	0	0	0	0	0	0	0	0	0	0	0	0	0	0	0	0	0	0	0	0	0	0	0	0	0	1	0	0	0	0	0	0	0	0	0	0	0	0	0	0	0	0	0	0	0
U. pictorum 312832416	0	0	0	0	0	0	0	0	0	0	0	0	0	0	0	0	0	0	0	0	0	0	0	0	0	0	0	0	0	0	1	0	0	0	0	0	0	0	0	0	0	0	0	0	0	0	0	0	0
U. pictorum 312833463	0	0	0	0	0	0	0	0	0	0	0	0	0	0	0	0	0	0	0	0	0	0	0	0	0	0	0	0	0	0	0	1	0	0	0	0	0	0	0	0	0	0	0	0	0	0	0	0	0
U. pictorum 212830777	0	0	0	0	0	0	0	0	0	0	0	0	0	0	0	0	0	0	0	0	0	0	0	0	0	0	0	0	0	0	0	0	1	0	0	0	0	0	0	0	0	0	0	0	0	0	0	0	0
U. pictorum 312832167	0	0	0	0	0	0	0	0	0	0	0	0	0	0	0	0	0	0	0	0	0	0	0	0	0	0	0	0	0	0	0	0	0	1	0	0	0	0	0	0	0	0	0	0	0	0	0	0	0
U. pictorum 262329236	0	0	0	0	0	0	0	0	0	0	0	0	0	0	0	0	0	0	0	0	0	0	0	0	0	0	0	0	0	0	0	0	0	0	1	0	0	0	0	0	0	0	0	0	0	0	0	0	0
U. pictorum 313386164	0	0	0	0	0	0	0	0	0	0	0	0	0	0	0	0	0	0	0	0	0	0	0	0	0	0	0	0	0	0	0	0	0	0	0	1	0	0	0	0	0	0	0	0	0	0	0	0	0
U. pictorum 313386163	0	0	0	0	0	0	0	0	0	0	0	0	0	0	0	0	0	0	0	0	0	0	0	0	0	0	0	0	0	0	0	0	0	0	0	0	1	0	0	0	0	0	0	0	0	0	0	0	0
U. pictorum 313355407	0	0	0	0	0	0	0	0	0	0	0	0	0	0	0	0	0	0	0	0	0	0	0	0	0	0	0	0	0	0	0	0	0	0	0	0	0	1	0	0	0	0	0	0	0	0	0	0	0
U. pictorum 313355406	0	0	0	0	0	0	0	0	0	0	0	0	0	0	0	0	0	0	0	0	0	0	0	0	0	0	0	0	0	0	0	0	0	0	0	0	0	0	1	0	0	0	0	0	0	0	0	0	0
U. pictorum 58308563	0	0	0	0	0	0	0	0	0	0	0	0	0	0	0	0	0	0	0	0	0	0	0	0	0	0	0	0	0	0	0	0	0	0	0	0	0	0	0	1	0	0	0	0	0	0	0	0	0
U. pictorum 312836546	0	0	0	0	0	0	0	0	0	0	0	0	0	0	0	0	0	0	0	0	0	0	0	0	0	0	0	0	0	0	0	0	0	0	0	0	0	0	0	0	1	0	0	0	0	0	0	0	0
U. pictorum 312831876	0	0	0	0	0	0	0	0	0	0	0	0	0	0	0	0	0	0	0	0	0	0	0	0	0	0	0	0	0	0	0	0	0	0	0	0	0	0	0	0	0	1	0	0	0	0	0	0	0
U. pictorum 215287583	0	0	0	0	0	0	0	0	0	0	0	0	0	0	0	0	0	0	0	0	0	0	0	0	0	0	0	0	0	0	0	0	0	0	0	0	0	0	0	0	0	0	1	0	0	0	0	0	0
U. pictorum 312832269	0	0	0	0	0	0	0	0	0	0	0	0	0	0	0	0	0	0	0	0	0	0	0	0	0	0	0	0	0	0	0	0	0	0	0	0	0	0	0	0	0	0	0	1	0	0	0	0	0
U. pictorum 312832411	0	0	0	0	0	0	0	0	0	0	0	0	0	0	0	0	0	0	0	0	0	0	0	0	0	0	0	0	0	0	0	0	0	0	0	0	0	0	0	0	0	0	0	0	1	0	0	0	0
U. pictorum 262327552	0	0	0	0	0	0	0	0	0	0	0	0	0	0	0	0	0	0	0	0	0	0	0	0	0	0	0	0	0	0	0	0	0	0	0	0	0	0	0	0	0	0	0	0	0	1	0	0	0
U. pictorum 149775233	0	0	0	0	0	0	0	0	0	0	0	0	0	0	0	0	0	0	0	0	0	0	0	0	0	0	0	0	0	0	0	0	0	0	0	0	0	0	0	0	0	0	0	0	0	0	1	0	0
U. pictorum 312833548	0	0	0	0	0	0	0	0	0	0	0	0	0	0	0	0	0	0	0	0	0	0	0	0	0	0	0	0	0	0	0	0	0	0	0	0	0	0	0	0	0	0	0	0	0	0	0	1	0
U. pictorum 312833294	0	0	0	0	0	0	0	0	0	0	0	0	0	0	0	0	0	0	0	0	0	0	0	0	0	0	0	0	0	0	0	0	0	0	0	0	0	0	0	0	0	0	0	0	0	0	0	0	1
U. pictorum 312835921	0	0	0	0	0	0	0	0	0	0	0	0	0	0	0	0	0	0	0	0	0	0	0	0	0	0	0	0	0	0	0	0	0	0	0	0	0	0	0	0	0	0	0	0	0	0	0	0	0
U. pictorum 312832665	0	0	0	0	0	0	0	0	0	0	0	0	0	0	0	0	0	0	0	0	0	0	0	0	0	0	0	0	0	0	0	0	0	0	0	0	0	0	0	0	0	0	0	0	0	0	0	0	0
U. pictorum 312832076	0	0	0	0	0	0	0	0	0	0	0	0	0	0	0	0	0	0	0	0	0	0	0	0	0	0	0	0	0	0	0	0	0	0	0	0	0	0	0	0	0	0	0	0	0	0	0	0	0
U. pictorum 312834242	0	0	0	0	0	0	0	0	0	0	0	0	0	0	0	0	0	0	0	0	0	0	0	0	0	0	0	0	0	0	0	0	0	0	0	0	0	0	0	0	0	0	0	0	0	0	0	0	0
U. pictorum 262322379	0	0	0	0	0	0	0	0	0	0	0	0	0	0	0	0	0	0	0	0	0	0	0	0	0	0	0	0	0	0	0	0	0	0	0	0	0	0	0	0	0	0	0	0	0	0	0	0	0
U. pictorum 312834557	0	0	0	0	0	0	0	0	0	0	0	0	0	0	0	0	0	0	0	0	0	0	0	0	0	0	0	0	0	0	0	0	0	0	0	0	0	0	0	0	0	0	0	0	0	0	0	0	0
U. pictorum 312834842	0	0	0	0	0	0	0	0	0	0	0	0	0	0	0	0	0	0	0	0	0	0	0	0	0	0	0	0	0	0	0	0	0	0	0	0	0	0	0	0	0	0	0	0	0	0	0	0	0
U. pictorum 312832044	0	0	0	0	0	0	0	0	0	0	0	0	0	0	0	0	0	0	0	0	0	0	0	0	0	0	0	0	0	0	0	0	0	0	0	0	0	0	0	0	0	0	0	0	0	0	0	0	0
U. pictorum 393389672	0	0	0	0	0	0	0	0	0	0	0	0	0	0	0	0	0	0	0	0	0	0	0	0	0	0	0	0	0	0	0	0	0	0	0	0	0	0	0	0	0	0	0	0	0	0	0	0	0
U. pictorum 312836017	0	0	0	0	0	0	0	0	0	0	0	0	0	0	0	0	0	0	0	0	0	0	0	0	0	0	0	0	0	0	0	0	0	0	0	0	0	0	0	0	0	0	0	0	0	0	0	0	0
U. pictorum 312835068	0	0	0	0	0	0	0	0	0	0	0	0	0	0	0	0	0	0	0	0	0	0	0	0	0	0	0	0	0	0	0	0	0	0	0	0	0	0	0	0	0	0	0	0	0	0	0	0	0
U. pictorum 312835235	0	0	0	0	0	0	0	0	0	0	0	0	0	0	0	0	0	0	0	0	0	0	0	0	0	0	0	0	0	0	0	0	0	0	0	0	0	0	0	0	0	0	0	0	0	0	0	0	0
U. pictorum 312836514	0	0	0	0	0	0	0	0	0	0	0	0	0	0	0	0	0	0	0	0	0	0	0	0	0	0	0	0	0	0	0	0	0	0	0	0	0	0	0	0	0	0	0	0	0	0	0	0	0
U. pictorum 312833208	0	0	0	0	0	0	0	0	0	0	0	0	0	0	0	0	0	0	0	0	0	0	0	0	0	0	0	0	0	0	0	0	0	0	0	0	0	0	0	0	0	0	0	0	0	0	0	0	0
U. pictorum 312836489	0	0	0	0	0	0	0	0	0	0	0	0	0	0	0	0	0	0	0	0	0	0	0	0	0	0	0	0	0	0	0	0	0	0	0	0	0	0	0	0	0	0	0	0	0	0	0	0	0
U. pictorum 312831936	0	0	0	0	0	0	0	0	0	0	0	0	0	0	0	0	0	0	0	0	0	0	0	0	0	0	0	0	0	0	0	0	0	0	0	0	0	0	0	0	0	0	0	0	0	0	0	0	0
U. pictorum 312834584	0	0	0	0	0	0	0	0	0	0	0	0	0	0	0	0	0	0	0	0	0	0	0	0	0	0	0	0	0	0	0	0	0	0	0	0	0	0	0	0	0	0	0	0	0	0	0	0	0
U. pictorum 312836656	0	0	0	0	0	0	0	0	0	0	0	0	0	0	0	0	0	0	0	0	0	0	0	0	0	0	0	0	0	0	0	0	0	0	0	0	0	0	0	0	0	0	0	0	0	0	0	0	0
U. pictorum 312832967	0	0	0	0	0	0	0	0	0	0	0	0	0	0	0	0	0	0	0	0	0	0	0	0	0	0	0	0	0	0	0	0	0	0	0	0	0	0	0	0	0	0	0	0	0	0	0	0	0
U. pictorum 312836368	0	0	0	0	0	0	0	0	0	0	0	0	0	0	0	0	0	0	0	0	0	0	0	0	0	0	0	0	0	0	0	0	0	0	0	0	0	0	0	0	0	0	0	0	0	0	0	0	0
U. pictorum 312835211	0	0	0	0	0	0	0	0	0	0	0	0	0	0	0	0	0	0	0	0	0	0	0	0	0	0	0	0	0	0	0	0	0	0	0	0	0	0	0	0	0	0	0	0	0	0	0	0	0
U. pictorum 312835941	0	0	0	0	0	0	0	0	0	0	0	0	0	0	0	0	0	0	0	0	0	0	0	0	0	0	0	0	0	0	0	0	0	0	0	0	0	0	0	0	0	0	0	0	0	0	0	0	0
U. pictorum 312834743	0	0	0	0	0	0	0	0	0	0	0	0	0	0	0	0	0	0	0	0	0	0	0	0	0	0	0	0	0	0	0	0	0	0	0	0	0	0	0	0	0	0	0	0	0	0	0	0	0
U. pictorum 312836480	0	0	0	0	0	0	0	0	0	0	0	0	0	0	0	0	0	0	0	0	0	0	0	0	0	0	0	0	0	0	0	0	0	0	0	0	0	0	0	0	0	0	0	0	0	0	0	0	0
U. pictorum 312835018	0	0	0	0	0	0	0	0	0	0	0	0	0	0	0	0	0	0	0	0	0	0	0	0	0	0	0	0	0	0	0	0	0	0	0	0	0	0	0	0	0	0	0	0	0	0	0	0	0
U. pictorum 312835676	0	0	0	0	0	0	0	0	0	0	0	0	0	0	0	0	0	0	0	0	0	0	0	0	0	0	0	0	0	0	0	0	0	0	0	0	0	0	0	0	0	0	0	0	0	0	0	0	0
U. pictorum 312835139	0	0	0	0	0	0	0	0	0	0	0	0	0	0	0	0	0	0	0	0	0	0	0	0	0	0	0	0	0	0	0	0	0	0	0	0	0	0	0	0	0	0	0	0	0	0	0	0	0
U. pictorum 312833442	0	0	0	0	0	0	0	0	0	0	0	0	0	0	0	0	0	0	0	0	0	0	0	0	0	0	0	0	0	0	0	0	0	0	0	0	0	0	0	0	0	0	0	0	0	0	0	0	0
U. pictorum 312833661	0	0	0	0	0	0	0	0	0	0	0	0	0	0	0	0	0	0	0	0	0	0	0	0	0	0	0	0	0	0	0	0	0	0	0	0	0	0	0	0	0	0	0	0	0	0	0	0	0
U. pictorum 312836646	0	0	0	0	0	0	0	0	0	0	0	0	0	0	0	0	0	0	0	0	0	0	0	0	0	0	0	0	0	0	0	0	0	0	0	0	0	0	0	0	0	0	0	0	0	0	0	0	0
U. pictorum 312836308	0	0	0	0	0	0	0	0	0	0	0	0	0	0	0	0	0	0	0	0	0	0	0	0	0	0	0	0	0	0	0	0	0	0	0	0	0	0	0	0	0	0	0	0	0	0	0	0	0
U. pictorum 312833308	0	0	0	0	0	0	0	0	0	0	0	0	0	0	0	0	0	0	0	0	0	0	0	0	0	0	0	0	0	0	0	0	0	0	0	0	0	0	0	0	0	0	0	0	0	0	0	0	0
U. pictorum 312835551	0	0	0	0	0	0	0	0	0	0	0	0	0	0	0	0	0	0	0	0	0	0	0	0	0	0	0	0	0	0	0	0	0	0	0	0	0	0	0	0	0	0	0	0	0	0	0	0	0
U. pictorum 312832031	0	0	0	0	0	0	0	0	0	0	0	0	0	0	0	0	0	0	0	0	0	0	0	0	0	0	0	0	0	0	0	0	0	0	0	0	0	0	0	0	0	0	0	0	0	0	0	0	0
U. pictorum 312832329	0	0	0	0	0	0	0	0	0	0	0	0	0	0	0	0	0	0	0	0	0	0	0	0	0	0	0	0	0	0	0	0	0	0	0	0	0	0	0	0	0	0	0	0	0	0	0	0	0
U. pictorum 312833947	0	0	0	0	0	0	0	0	0	0	0	0	0	0	0	0	0	0	0	0	0	0	0	0	0	0	0	0	0	0	0	0	0	0	0	0	0	0	0	0	0	0	0	0	0	0	0	0	0
U. pictorum 312835833	0	0	0	0	0	0	0	0	0	0	0	0	0	0	0	0	0	0	0	0	0	0	0	0	0	0	0	0	0	0	0	0	0	0	0	0	0	0	0	0	0	0	0	0	0	0	0	0	0
U. pictorum 312833207	0	0	0	0	0	0	0	0	0	0	0	0	0	0	0	0	0	0	0	0	0	0	0	0	0	0	0	0	0	0	0	0	0	0	0	0	0	0	0	0	0	0	0	0	0	0	0	0	0
U. pictorum 114204518	0	0	0	0	0	0	0	0	0	0	0	0	0	0	0	0	0	0	0	0	0	0	0	0	0	0	0	0	0	0	0	0	0	0	0	0	0	0	0	0	0	0	0	0	0	0	0	0	0
U. pictorum 149407444	0	0	0	0	0	0	0	0	0	0	0	0	0	0	0	0	0	0	0	0	0	0	0	0	0	0	0	0	0	0	0	0	0	0	0	0	0	0	0	0	0	0	0	0	0	0	0	0	0
U. pictorum 157942409	0	0	0	0	0	0	0	0	0	0	0	0	0	0	0	0	0	0	0	0	0	0	0	0	0	0	0	0	0	0	0	0	0	0	0	0	0	0	0	0	0	0	0	0	0	0	0	0	0
U. pictorum 163957824	0	0	0	0	0	0	0	0	0	0	0	0	0	0	0	0	0	0	0	0	0	0	0	0	0	0	0	0	0	0	0	0	0	0	0	0	0	0	0	0	0	0	0	0	0	0	0	0	0
U. pictorum 157944922	0	0	0	0	0	0	0	0	0	0	0	0	0	0	0	0	0	0	0	0	0	0	0	0	0	0	0	0	0	0	0	0	0	0	0	0	0	0	0	0	0	0	0	0	0	0	0	0	0
U. pictorum 121326581	0	0	0	0	0	0	0	0	0	0	0	0	0	0	0	0	0	0	0	0	0	0	0	0	0	0	0	0	0	0	0	0	0	0	0	0	0	0	0	0	0	0	0	0	0	0	0	0	0
U. pictorum 262327097	0	0	0	0	0	0	0	0	0	0	0	0	0	0	0	0	0	0	0	0	0	0	0	0	0	0	0	0	0	0	0	0	0	0	0	0	0	0	0	0	0	0	0	0	0	0	0	0	0
U. pictorum 262328600	0	0	0	0	0	0	0	0	0	0	0	0	0	0	0	0	0	0	0	0	0	0	0	0	0	0	0	0	0	0	0	0	0	0	0	0	0	0	0	0	0	0	0	0	0	0	0	0	0
U. pictorum 312832012	0	0	0	0	0	0	0	0	0	0	0	0	0	0	0	0	0	0	0	0	0	0	0	0	0	0	0	0	0	0	0	0	0	0	0	0	0	0	0	0	0	0	0	0	0	0	0	0	0
U. pictorum 262326463	0	0	0	0	0	0	0	0	0	0	0	0	0	0	0	0	0	0	0	0	0	0	0	0	0	0	0	0	0	0	0	0	0	0	0	0	0	0	0	0	0	0	0	0	0	0	0	0	0
U. pictorum 312834186	0	0	0	0	0	0	0	0	0	0	0	0	0	0	0	0	0	0	0	0	0	0	0	0	0	0	0	0	0	0	0	0	0	0	0	0	0	0	0	0	0	0	0	0	0	0	0	0	0
U. pictorum 312833630	0	0	0	0	0	0	0	0	0	0	0	0	0	0	0	0	0	0	0	0	0	0	0	0	0	0	0	0	0	0	0	0	0	0	0	0	0	0	0	0	0	0	0	0	0	0	0	0	0
U. pictorum 312835451	0	0	0	0	0	0	0	0	0	0	0	0	0	0	0	0	0	0	0	0	0	0	0	0	0	0	0	0	0	0	0	0	0	0	0	0	0	0	0	0	0	0	0	0	0	0	0	0	0
U. pictorum 313359112	0	0	0	0	0	0	0	0	0	0	0	0	0	0	0	0	0	0	0	0	0	0	0	0	0	0	0	0	0	0	0	0	0	0	0	0	0	0	0	0	0	0	0	0	0	0	0	0	0
U. pictorum 260925868	0	0	0	0	0	0	0	0	0	0	0	0	0	0	0	0	0	0	0	0	0	0	0	0	0	0	0	0	0	0	0	0	0	0	0	0	0	0	0	0	0	0	0	0	0	0	0	0	0
U. pictorum 312835161	0	0	0	0	0	0	0	0	0	0	0	0	0	0	0	0	0	0	0	0	0	0	0	0	0	0	0	0	0	0	0	0	0	0	0	0	0	0	0	0	0	0	0	0	0	0	0	0	0
U. pictorum 239585945	0	0	0	0	0	0	0	0	0	0	0	0	0	0	0	0	0	0	0	0	0	0	0	0	0	0	0	0	0	0	0	0	0	0	0	0	0	0	0	0	0	0	0	0	0	0	0	0	0
U. pictorum 237638533	0	0	0	0	0	0	0	0	0	0	0	0	0	0	0	0	0	0	0	0	0	0	0	0	0	0	0	0	0	0	0	0	0	0	0	0	0	0	0	0	0	0	0	0	0	0	0	0	0
U. pictorum 312836026	0	0	0	0	0	0	0	0	0	0	0	0	0	0	0	0	0	0	0	0	0	0	0	0	0	0	0	0	0	0	0	0	0	0	0	0	0	0	0	0	0	0	0	0	0	0	0	0	0
U. pictorum 168810200	0	0	0	0	0	0	0	0	0	0	0	0	0	0	0	0	0	0	0	0	0	0	0	0	0	0	0	0	0	0	0	0	0	0	0	0	0	0	0	0	0	0	0	0	0	0	0	0	0
U. pictorum 163527537	0	0	0	0	0	0	0	0	0	0	0	0	0	0	0	0	0	0	0	0	0	0	0	0	0	0	0	0	0	0	0	0	0	0	0	0	0	0	0	0	0	0	0	0	0	0	0	0	0
U. pictorum 163527536	0	0	0	0	0	0	0	0	0	0	0	0	0	0	0	0	0	0	0	0	0	0	0	0	0	0	0	0	0	0	0	0	0	0	0	0	0	0	0	0	0	0	0	0	0	0	0	0	0
U. pictorum 260626141	0	0	0	0	0	0	0	0	0	0	0	0	0	0	0	0	0	0	0	0	0	0	0	0	0	0	0	0	0	0	0	0	0	0	0	0	0	0	0	0	0	0	0	0	0	0	0	0	0
U. pictorum 260928565	0	0	0	0	0	0	0	0	0	0	0	0	0	0	0	0	0	0	0	0	0	0	0	0	0	0	0	0	0	0	0	0	0	0	0	0	0	0	0	0	0	0	0	0	0	0	0	0	0
U. pictorum 239585879	0	0	0	0	0	0	0	0	0	0	0	0	0	0	0	0	0	0	0	0	0	0	0	0	0	0	0	0	0	0	0	0	0	0	0	0	0	0	0	0	0	0	0	0	0	0	0	0	0
U. pictorum 312832251	0	0	0	0	0	0	0	0	0	0	0	0	0	0	0	0	0	0	0	0	0	0	0	0	0	0	0	0	0	0	0	0	0	0	0	0	0	0	0	0	0	0	0	0	0	0	0	0	0
U. pictorum 164567054	0	0	0	0	0	0	0	0	0	0	0	0	0	0	0	0	0	0	0	0	0	0	0	0	0	0	0	0	0	0	0	0	0	0	0	0	0	0	0	0	0	0	0	0	0	0	0	0	0
U. pictorum 312834086	0	0	0	0	0	0	0	0	0	0	0	0	0	0	0	0	0	0	0	0	0	0	0	0	0	0	0	0	0	0	0	0	0	0	0	0	0	0	0	0	0	0	0	0	0	0	0	0	0
U. pictorum 312831970	0	0	0	0	0	0	0	0	0	0	0	0	0	0	0	0	0	0	0	0	0	0	0	0	0	0	0	0	0	0	0	0	0	0	0	0	0	0	0	0	0	0	0	0	0	0	0	0	0
U. pictorum 312831953	0	0	0	0	0	0	0	0	0	0	0	0	0	0	0	0	0	0	0	0	0	0	0	0	0	0	0	0	0	0	0	0	0	0	0	0	0	0	0	0	0	0	0	0	0	0	0	0	0
U. pictorum 163392107	0	0	0	0	0	0	0	0	0	0	0	0	0	0	0	0	0	0	0	0	0	0	0	0	0	0	0	0	0	0	0	0	0	0	0	0	0	0	0	0	0	0	0	0	0	0	0	0	0
U. pictorum 260740983	0	0	0	0	0	0	0	0	0	0	0	0	0	0	0	0	0	0	0	0	0	0	0	0	0	0	0	0	0	0	0	0	0	0	0	0	0	0	0	0	0	0	0	0	0	0	0	0	0
U. pictorum 313342696	0	0	0	0	0	0	0	0	0	0	0	0	0	0	0	0	0	0	0	0	0	0	0	0	0	0	0	0	0	0	0	0	0	0	0	0	0	0	0	0	0	0	0	0	0	0	0	0	0
U. crassus 312835028	1	0	0	0	0	0	0	0	0	0	0	0	0	0	0	0	0	0	0	0	0	0	0	0	0	0	0	0	0	0	0	0	0	0	0	0	0	0	0	0	0	0	0	0	0	0	0	0	0
U. crassus 312834711	0	0	0	0	0	0	0	0	0	0	0	0	0	0	0	0	0	0	0	0	0	0	0	0	0	0	0	0	0	0	0	0	0	0	0	0	0	0	0	0	0	0	0	0	0	0	0	0	0
U. crassus 312833428	0	0	0	0	0	0	0	0	0	0	0	0	0	0	0	0	0	0	0	0	0	0	0	0	0	0	0	0	0	0	0	0	0	0	0	0	0	0	0	0	0	0	0	0	0	0	0	0	0
U. crassus 312836478	0	0	0	0	0	0	0	0	0	0	0	0	0	0	0	0	0	0	0	0	0	0	0	0	0	0	0	0	0	0	0	0	0	0	0	0	0	0	0	0	0	0	0	0	0	0	0	0	0
U. crassus 312835249	0	0	0	0	0	0	0	0	0	0	0	0	0	0	0	0	0	0	0	0	0	0	0	0	0	0	0	0	0	0	0	0	0	0	0	0	0	0	0	0	0	0	0	0	0	0	0	0	0
U. crassus 121459237	0	0	0	0	0	0	0	0	0	0	0	0	0	0	0	0	0	0	0	0	0	0	0	0	0	0	0	0	0	0	0	0	0	0	0	0	0	0	0	0	0	0	0	0	0	0	0	0	0
U. crassus 121459213	0	0	0	0	0	0	0	0	0	0	0	0	0	0	0	0	0	0	0	0	0	0	0	0	0	0	0	0	0	0	0	0	0	0	0	0	0	0	0	0	0	0	0	0	0	0	0	0	0
U. crassus 312833634	0	0	0	0	0	0	0	0	0	0	0	0	0	1	0	0	0	0	0	0	0	0	0	0	0	0	0	0	0	0	0	0	0	0	0	0	0	0	0	0	0	0	0	0	0	0	0	0	0
U. crassus 312836546	0	0	0	0	0	0	0	0	0	0	0	0	0	0	0	0	0	0	0	0	0	0	0	0	0	0	0	0	0	0	0	0	0	0	0	0	0	0	0	0	1	0	0	0	0	0	0	0	0
U. crassus 312836213	0	0	0	0	0	0	0	0	0	0	0	0	0	0	0	0	0	0	0	0	0	0	0	0	0	0	0	0	0	0	0	0	0	0	0	0	0	0	0	0	0	0	0	0	0	0	0	0	0
U. crassus 312833977	0	0	0	0	0	0	0	1	0	0	0	0	0	0	0	0	0	0	0	0	0	0	0	0	0	0	0	0	0	0	0	0	0	0	0	0	0	0	0	0	0	0	0	0	0	0	0	0	0
U. crassus 312835577	0	0	0	0	0	0	0	0	0	0	0	0	0	0	0	0	0	0	0	0	0	0	0	0	0	0	0	0	0	0	0	0	0	0	0	0	0	0	0	0	0	0	0	0	0	0	0	0	0
U. crassus 325152144	0	0	0	0	0	0	0	0	0	0	0	0	0	0	0	0	0	0	0	0	0	0	0	0	0	0	0	0	0	0	0	0	0	0	0	0	0	0	0	0	0	0	0	0	0	0	0	0	0
U. crassus 194258150	0	0	0	0	0	0	0	0	0	0	0	0	0	0	0	0	0	0	0	0	0	0	0	0	0	0	0	0	0	0	0	0	0	0	0	0	0	0	0	0	0	0	0	0	0	0	0	0	0
U. crassus 312834881	0	0	1	0	0	0	0	0	0	0	0	0	0	0	0	0	0	0	0	0	0	0	0	0	0	0	0	0	0	0	0	0	0	0	0	0	0	0	0	0	0	0	0	0	0	0	0	0	0
U. crassus 262325020	0	0	0	0	0	0	0	0	0	0	0	0	0	0	0	0	0	0	0	0	0	0	0	0	0	0	0	0	0	0	0	0	0	0	0	0	0	0	0	0	0	0	0	0	0	0	0	0	0
U. crassus 312836368	0	0	0	0	0	0	0	0	0	0	0	0	0	0	0	0	0	0	0	0	0	0	0	0	0	0	0	0	0	0	0	0	0	0	0	0	0	0	0	0	0	0	0	0	0	0	0	0	0
U. crassus 212816519	0	0	0	0	0	0	0	0	0	0	0	0	0	0	0	0	0	0	0	0	0	0	0	0	0	0	0	0	0	0	0	0	0	0	0	0	0	0	0	0	0	0	0	0	0	0	0	0	0
U. crassus 212818923	0	0	0	0	0	0	0	0	0	0	0	0	0	0	0	0	0	0	0	0	0	0	0	0	0	0	0	0	0	0	0	0	0	0	0	0	0	0	0	0	0	0	0	0	0	0	0	0	0
U. crassus 212812588	0	0	0	0	0	0	0	0	0	0	0	0	0	0	0	0	0	0	0	0	0	0	0	0	0	0	0	0	0	0	0	0	0	0	0	0	0	0	0	0	0	0	0	0	0	0	0	0	0
U. crassus 212818163	0	0	0	0	0	0	0	0	0	0	0	0	0	0	0	0	0	0	0	0	0	0	0	0	0	0	0	0	0	0	0	0	0	0	0	0	0	0	0	0	0	0	0	0	0	0	0	0	0
U. crassus 212817495	0	0	0	0	0	0	0	0	0	0	0	0	0	0	0	0	0	0	0	0	0	0	0	0	0	0	0	0	0	0	0	0	0	0	0	0	0	0	0	0	0	0	0	0	0	0	0	0	0
U. crassus 313386164	0	0	0	0	0	0	0	0	0	0	0	0	0	0	0	0	0	0	0	0	0	0	0	0	0	0	0	0	0	0	0	0	0	0	0	1	0	0	0	0	0	0	0	0	0	0	0	0	0
U. crassus 313386163	0	0	0	0	0	0	0	0	0	0	0	0	0	0	0	0	0	0	0	0	0	0	0	0	0	0	0	0	0	0	0	0	0	0	0	0	1	0	0	0	0	0	0	0	0	0	0	0	0
U. crassus 313355407	0	0	0	0	0	0	0	0	0	0	0	0	0	0	0	0	0	0	0	0	0	0	0	0	0	0	0	0	0	0	0	0	0	0	0	0	0	1	0	0	0	0	0	0	0	0	0	0	0
U. crassus 313355406	0	0	0	0	0	0	0	0	0	0	0	0	0	0	0	0	0	0	0	0	0	0	0	0	0	0	0	0	0	0	0	0	0	0	0	0	0	0	1	0	0	0	0	0	0	0	0	0	0
U. crassus 312836493	0	0	0	0	0	0	0	0	0	0	0	0	0	0	0	0	0	0	0	0	0	0	0	0	0	0	0	0	0	1	0	0	0	0	0	0	0	0	0	0	0	0	0	0	0	0	0	0	0
U. crassus 312835451	0	0	0	0	0	0	0	0	0	0	0	0	0	0	0	0	0	0	0	0	0	0	0	0	0	0	0	0	0	0	0	0	0	0	0	0	0	0	0	0	0	0	0	0	0	0	0	0	0
U. crassus 262323052	0	0	0	0	0	0	0	0	0	0	0	0	0	0	0	0	0	0	0	0	0	0	0	0	0	0	0	0	0	0	0	0	0	0	0	0	0	0	0	0	0	0	0	0	0	0	0	0	0
U. crassus 203683599	0	0	0	0	0	0	0	0	0	0	0	0	0	0	0	0	0	0	0	0	0	0	0	0	0	0	0	0	0	0	0	0	0	0	0	0	0	0	0	0	0	0	0	0	0	0	0	0	0
U. crassus 312836115	0	0	0	0	0	0	0	0	0	0	0	0	0	0	0	0	0	0	0	0	0	0	0	0	0	0	0	0	0	0	0	0	0	0	0	0	0	0	0	0	0	0	0	0	0	0	0	0	0
U. crassus 312832416	0	0	0	0	0	0	0	0	0	0	0	0	0	0	0	0	0	0	0	0	0	0	0	0	0	0	0	0	0	0	1	0	0	0	0	0	0	0	0	0	0	0	0	0	0	0	0	0	0
U. crassus 312835629	0	0	0	0	0	0	0	0	0	0	0	0	0	0	0	0	0	0	0	0	0	0	0	0	0	0	0	0	0	0	0	0	0	0	0	0	0	0	0	0	0	0	0	0	0	0	0	0	0
U. crassus 203678605	0	0	0	0	0	0	0	0	0	0	0	0	0	0	0	0	0	0	0	0	0	0	0	0	0	0	0	0	0	0	0	0	0	0	0	0	0	0	0	0	0	0	0	0	0	0	0	0	0
U. crassus 218922094	0	0	0	0	0	0	0	0	0	0	0	0	0	0	0	0	0	0	0	0	0	0	0	0	0	0	0	0	0	0	0	0	0	0	0	0	0	0	0	0	0	0	0	0	0	0	0	0	0
U. crassus 218921948	0	0	0	0	0	0	0	0	0	0	0	0	0	0	0	0	0	0	0	0	0	0	0	0	0	0	0	0	0	0	0	0	0	0	0	0	0	0	0	0	0	0	0	0	0	0	0	0	0
U. crassus 203610911	0	0	0	0	0	0	0	0	0	0	0	0	0	0	0	0	0	0	0	0	0	0	0	0	0	0	0	0	0	0	0	0	0	0	0	0	0	0	0	0	0	0	0	0	0	0	0	0	0
U. crassus 312832836	0	0	0	0	0	0	0	0	0	0	0	0	0	0	0	0	0	0	0	0	0	0	0	0	0	0	0	0	0	0	0	0	0	0	0	0	0	0	0	0	0	0	0	0	0	0	0	0	0
U. crassus 312833860	0	0	0	0	0	0	0	0	0	0	0	0	0	0	0	0	0	0	0	0	0	0	0	0	0	0	0	0	0	0	0	0	0	0	0	0	0	0	0	0	0	0	0	0	0	0	0	0	0
U. crassus 312832154	0	0	0	0	0	0	0	0	0	0	0	0	0	0	0	0	0	0	0	0	0	0	0	0	0	0	0	0	0	0	0	0	0	0	0	0	0	0	0	0	0	0	0	0	0	0	0	0	0
U. crassus 168810200	0	0	0	0	0	0	0	0	0	0	0	0	0	0	0	0	0	0	0	0	0	0	0	0	0	0	0	0	0	0	0	0	0	0	0	0	0	0	0	0	0	0	0	0	0	0	0	0	0
U. crassus 312836519	0	0	0	0	0	0	0	0	0	0	0	0	1	0	0	0	0	0	0	0	0	0	0	0	0	0	0	0	0	0	0	0	0	0	0	0	0	0	0	0	0	0	0	0	0	0	0	0	0
U. crassus 342661626	0	0	0	0	0	0	0	0	0	0	0	0	0	0	0	0	0	0	0	0	0	0	0	0	0	0	0	0	0	0	0	0	0	0	0	0	0	0	0	0	0	0	0	0	0	0	0	0	0
U. crassus 312832251	0	0	0	0	0	0	0	0	0	0	0	0	0	0	0	0	0	0	0	0	0	0	0	0	0	0	0	0	0	0	0	0	0	0	0	0	0	0	0	0	0	0	0	0	0	0	0	0	0
U. crassus 312836742	0	0	0	0	0	0	0	0	0	0	0	0	0	0	0	0	0	0	0	0	0	0	0	0	0	0	0	0	0	0	0	0	0	0	0	0	0	0	0	0	0	0	0	0	0	0	0	0	0
U. crassus 312835620	0	0	0	0	0	0	0	0	0	0	0	0	0	0	0	0	0	0	0	0	0	0	0	0	0	0	0	0	0	0	0	0	0	0	0	0	0	0	0	0	0	0	0	0	0	0	0	0	0
U. crassus 312833902	0	0	0	0	0	0	0	0	0	0	0	0	0	0	0	0	0	0	0	0	0	0	0	0	0	0	0	0	0	0	0	0	0	0	0	0	0	0	0	0	0	0	0	0	0	0	0	0	0
U. crassus 312831970	0	0	0	0	0	0	0	0	0	0	0	0	0	0	0	0	0	0	0	0	0	0	0	0	0	0	0	0	0	0	0	0	0	0	0	0	0	0	0	0	0	0	0	0	0	0	0	0	0
U. crassus 47561817	0	0	0	0	0	0	0	0	0	0	0	0	0	0	0	0	0	0	0	0	0	0	0	0	0	0	0	0	0	0	0	0	0	0	0	0	0	0	0	0	0	0	0	0	0	0	0	0	0
U. crassus 164567054	0	0	0	0	0	0	0	0	0	0	0	0	0	0	0	0	0	0	0	0	0	0	0	0	0	0	0	0	0	0	0	0	0	0	0	0	0	0	0	0	0	0	0	0	0	0	0	0	0
U. crassus 312833149	0	0	0	0	0	0	0	0	0	0	0	0	0	0	0	0	0	0	0	0	0	0	0	0	0	0	0	0	0	0	0	0	0	0	0	0	0	0	0	0	0	0	0	0	0	0	0	0	0
U. crassus 312835179	0	0	0	0	0	0	0	0	0	0	0	0	0	0	0	0	0	0	0	0	0	0	0	0	0	0	0	0	0	0	0	0	0	0	0	0	0	0	0	0	0	0	0	0	0	0	0	0	0
U. crassus 312835002	0	0	0	0	0	0	0	0	0	0	0	0	0	0	0	0	0	1	0	0	0	0	0	0	0	0	0	0	0	0	0	0	0	0	0	0	0	0	0	0	0	0	0	0	0	0	0	0	0
U. crassus 312834262	0	0	0	0	0	0	0	0	0	0	0	0	0	0	0	0	0	0	1	0	0	0	0	0	0	0	0	0	0	0	0	0	0	0	0	0	0	0	0	0	0	0	0	0	0	0	0	0	0
U. crassus 312836017	0	0	0	0	0	0	0	0	0	0	0	0	0	0	0	0	0	0	0	0	0	0	0	0	0	0	0	0	0	0	0	0	0	0	0	0	0	0	0	0	0	0	0	0	0	0	0	0	0
U. crassus 313327375	0	0	0	0	0	0	0	0	0	0	0	0	0	0	0	0	0	0	0	0	0	0	0	0	0	0	0	0	0	0	0	0	0	0	0	0	0	0	0	0	0	0	0	0	0	0	0	0	0
U. crassus 312835846	0	0	0	0	0	0	0	0	0	0	0	0	0	0	0	0	0	0	0	0	0	0	0	0	0	0	0	0	0	0	0	0	0	0	0	0	0	0	0	0	0	0	0	0	0	0	0	0	0
U. crassus 262327333	0	0	0	0	0	0	0	0	0	0	0	0	0	0	0	0	0	0	0	0	0	1	0	0	0	0	0	0	0	0	0	0	0	0	0	0	0	0	0	0	0	0	0	0	0	0	0	0	0
U. crassus 238639212	0	0	0	0	0	0	0	0	0	0	0	0	0	0	0	0	0	0	0	0	0	0	0	0	0	0	0	0	0	0	0	0	0	0	0	0	0	0	0	0	0	0	0	0	0	0	0	0	0
U. crassus 378908377	0	0	0	0	0	0	0	0	0	0	0	0	0	0	0	0	0	0	0	0	0	0	0	0	0	0	0	0	0	0	0	0	0	0	0	0	0	0	0	0	0	0	0	0	0	0	0	0	0
M. margaritifera 312834327	0	0	0	1	0	0	0	0	0	0	0	0	0	0	0	0	0	0	0	0	0	0	0	0	0	0	0	0	0	0	0	0	0	0	0	0	0	0	0	0	0	0	0	0	0	0	0	0	0
M. margaritifera 312834881	0	0	1	0	0	0	0	0	0	0	0	0	0	0	0	0	0	0	0	0	0	0	0	0	0	0	0	0	0	0	0	0	0	0	0	0	0	0	0	0	0	0	0	0	0	0	0	0	0
M. margaritifera 312836546	0	0	0	0	0	0	0	0	0	0	0	0	0	0	0	0	0	0	0	0	0	0	0	0	0	0	0	0	0	0	0	0	0	0	0	0	0	0	0	0	1	0	0	0	0	0	0	0	0
M. margaritifera 312833977	0	0	0	0	0	0	0	1	0	0	0	0	0	0	0	0	0	0	0	0	0	0	0	0	0	0	0	0	0	0	0	0	0	0	0	0	0	0	0	0	0	0	0	0	0	0	0	0	0
M. margaritifera 312836213	0	0	0	0	0	0	0	0	0	0	0	0	0	0	0	0	0	0	0	0	0	0	0	0	0	0	0	0	0	0	0	0	0	0	0	0	0	0	0	0	0	0	0	0	0	0	0	0	0
M. margaritifera 312832049	0	0	0	0	0	0	0	0	0	0	0	0	0	0	0	0	0	0	0	0	0	0	0	0	0	0	0	0	0	0	0	0	0	0	0	0	0	0	0	0	0	0	0	0	0	0	0	0	0
M. margaritifera 312835028	1	0	0	0	0	0	0	0	0	0	0	0	0	0	0	0	0	0	0	0	0	0	0	0	0	0	0	0	0	0	0	0	0	0	0	0	0	0	0	0	0	0	0	0	0	0	0	0	0
M. margaritifera 312833634	0	0	0	0	0	0	0	0	0	0	0	0	0	1	0	0	0	0	0	0	0	0	0	0	0	0	0	0	0	0	0	0	0	0	0	0	0	0	0	0	0	0	0	0	0	0	0	0	0
M. margaritifera 262326668	0	0	0	0	0	0	0	0	1	0	0	0	0	0	0	0	0	0	0	0	0	0	0	0	0	0	0	0	0	0	0	0	0	0	0	0	0	0	0	0	0	0	0	0	0	0	0	0	0
M. margaritifera 262319994	0	0	0	0	0	1	0	0	0	0	0	0	0	0	0	0	0	0	0	0	0	0	0	0	0	0	0	0	0	0	0	0	0	0	0	0	0	0	0	0	0	0	0	0	0	0	0	0	0
M. margaritifera 262327333	0	0	0	0	0	0	0	0	0	0	0	0	0	0	0	0	0	0	0	0	0	1	0	0	0	0	0	0	0	0	0	0	0	0	0	0	0	0	0	0	0	0	0	0	0	0	0	0	0
M. margaritifera 260748576	0	0	0	0	0	0	0	0	0	0	0	0	0	0	0	0	0	0	0	0	0	0	0	0	0	0	0	0	0	0	0	0	0	0	0	0	0	0	0	0	0	0	0	0	0	0	0	0	0
M. margaritifera 58307798	0	0	0	0	0	0	0	0	0	0	0	0	0	0	0	0	0	0	0	0	0	0	0	0	0	0	0	0	0	0	0	0	0	0	0	0	0	0	0	0	0	0	0	0	0	0	0	0	0
M. margaritifera 168810200	0	0	0	0	0	0	0	0	0	0	0	0	0	0	0	0	0	0	0	0	0	0	0	0	0	0	0	0	0	0	0	0	0	0	0	0	0	0	0	0	0	0	0	0	0	0	0	0	0
M. margaritifera 312833149	0	0	0	0	0	0	0	0	0	0	0	0	0	0	0	0	0	0	0	0	0	0	0	0	0	0	0	0	0	0	0	0	0	0	0	0	0	0	0	0	0	0	0	0	0	0	0	0	0
M. margaritifera 312835002	0	0	0	0	0	0	0	0	0	0	0	0	0	0	0	0	0	1	0	0	0	0	0	0	0	0	0	0	0	0	0	0	0	0	0	0	0	0	0	0	0	0	0	0	0	0	0	0	0
M. margaritifera 312834262	0	0	0	0	0	0	0	0	0	0	0	0	0	0	0	0	0	0	1	0	0	0	0	0	0	0	0	0	0	0	0	0	0	0	0	0	0	0	0	0	0	0	0	0	0	0	0	0	0
M. margaritifera 312835179	0	0	0	0	0	0	0	0	0	0	0	0	0	0	0	0	0	0	0	0	0	0	0	0	0	0	0	0	0	0	0	0	0	0	0	0	0	0	0	0	0	0	0	0	0	0	0	0	0
M. margaritifera 312836493	0	0	0	0	0	0	0	0	0	0	0	0	0	0	0	0	0	0	0	0	0	0	0	0	0	0	0	0	0	1	0	0	0	0	0	0	0	0	0	0	0	0	0	0	0	0	0	0	0
M. margaritifera 312833947	0	0	0	0	0	0	0	0	0	0	0	0	0	0	0	0	0	0	0	0	0	0	0	0	0	0	0	0	0	0	0	0	0	0	0	0	0	0	0	0	0	0	0	0	0	0	0	0	0
M. margaritifera 312836519	0	0	0	0	0	0	0	0	0	0	0	0	1	0	0	0	0	0	0	0	0	0	0	0	0	0	0	0	0	0	0	0	0	0	0	0	0	0	0	0	0	0	0	0	0	0	0	0	0
M. margaritifera 312835367	0	0	0	0	0	0	0	0	0	0	0	0	0	0	0	0	0	0	0	0	0	0	0	0	0	0	0	0	0	0	0	0	0	0	0	0	0	0	0	0	0	0	0	0	0	0	0	0	0
M. margaritifera 312833467	0	0	0	0	0	0	0	0	0	0	0	0	0	0	0	0	0	0	0	0	0	0	0	0	0	0	0	0	0	0	0	0	0	0	0	0	0	0	0	0	0	0	0	0	0	0	0	0	0
M. margaritifera 312833968	0	0	0	0	0	0	0	0	0	0	0	0	0	0	0	0	0	0	0	0	0	0	0	0	0	0	0	0	0	0	0	0	0	0	0	0	0	0	0	0	0	0	0	0	0	0	0	0	0
M. margaritifera 312833361	0	0	0	0	0	0	0	0	0	0	0	0	0	0	0	0	0	0	0	0	0	0	0	0	0	0	0	0	0	0	0	0	0	0	0	0	0	0	0	0	0	0	0	0	0	0	0	0	0
M. margaritifera 312831732	0	0	0	0	0	0	0	0	0	0	0	0	0	0	0	0	0	0	0	0	0	0	0	0	0	0	0	0	0	0	0	0	0	0	0	0	0	0	0	0	0	0	0	0	0	0	0	0	0
M. margaritifera 312832586	0	0	0	0	0	0	0	0	0	0	0	0	0	0	0	0	0	0	0	0	0	0	0	0	0	0	0	0	0	0	0	0	0	0	0	0	0	0	0	0	0	0	0	0	0	0	0	0	0
M. margaritifera 312832926	0	0	0	0	0	0	0	0	0	0	0	0	0	0	0	0	0	0	0	0	0	0	0	0	0	0	0	0	0	0	0	0	0	0	0	0	0	0	0	0	0	0	0	0	0	0	0	0	0
M. margaritifera 332317720	0	0	0	0	0	0	0	0	0	0	0	0	0	0	0	0	0	0	0	0	0	0	0	0	0	0	0	0	0	0	0	0	0	0	0	0	0	0	0	0	0	0	0	0	0	0	0	0	0
M. margaritifera 312833463	0	0	0	0	0	0	0	0	0	0	0	0	0	0	0	0	0	0	0	0	0	0	0	0	0	0	0	0	0	0	0	1	0	0	0	0	0	0	0	0	0	0	0	0	0	0	0	0	0
M. margaritifera 312835486	0	0	0	0	0	0	0	0	0	0	0	0	0	0	0	0	0	0	0	0	0	0	0	0	0	0	0	0	0	0	0	0	0	0	0	0	0	0	0	0	0	0	0	0	0	0	0	0	0
M. margaritifera 312832689	0	0	0	0	0	0	0	0	0	0	0	0	0	0	0	0	0	0	0	0	0	0	0	0	0	0	0	0	0	0	0	0	0	0	0	0	0	0	0	0	0	0	0	0	0	0	0	0	0
M. margaritifera 312832075	0	0	0	0	0	0	0	0	0	0	0	0	0	0	0	0	0	0	0	0	0	0	0	0	0	0	0	0	0	0	0	0	0	0	0	0	0	0	0	0	0	0	0	0	0	0	0	0	0
M. margaritifera 312836598	0	0	0	0	0	0	0	0	0	0	0	0	0	0	0	0	0	0	0	0	0	0	0	0	0	0	1	0	0	0	0	0	0	0	0	0	0	0	0	0	0	0	0	0	0	0	0	0	0
M. margaritifera 312832625	0	0	0	0	0	0	0	0	0	0	0	0	0	0	0	0	0	0	0	0	0	0	0	0	0	0	0	1	0	0	0	0	0	0	0	0	0	0	0	0	0	0	0	0	0	0	0	0	0
M. margaritifera 312835948	0	0	0	0	0	0	0	0	0	0	0	0	0	0	0	0	0	0	0	0	0	0	0	0	0	0	0	0	0	0	0	0	0	0	0	0	0	0	0	0	0	0	0	0	0	0	0	0	0
M. margaritifera 312834649	0	0	0	0	0	0	0	0	0	0	0	0	0	0	0	0	0	0	0	0	0	0	0	0	0	0	0	0	1	0	0	0	0	0	0	0	0	0	0	0	0	0	0	0	0	0	0	0	0
M. margaritifera 312836560	0	0	0	0	0	0	0	0	0	0	0	0	0	0	0	0	0	0	0	0	0	0	0	0	0	0	0	0	0	0	0	0	0	0	0	0	0	0	0	0	0	0	0	0	0	0	0	0	0
M. margaritifera 312836115	0	0	0	0	0	0	0	0	0	0	0	0	0	0	0	0	0	0	0	0	0	0	0	0	0	0	0	0	0	0	0	0	0	0	0	0	0	0	0	0	0	0	0	0	0	0	0	0	0
M. margaritifera 312836366	0	0	0	0	0	0	0	0	0	0	0	0	0	0	0	0	0	0	0	0	0	0	0	0	0	0	0	0	0	0	0	0	0	0	0	0	0	0	0	0	0	0	0	0	0	0	0	0	0
M. margaritifera 58307060	0	0	0	0	0	0	0	0	0	0	0	0	0	0	0	0	0	0	0	0	0	0	0	0	0	0	0	0	0	0	0	0	0	0	0	0	0	0	0	0	0	0	0	0	0	0	0	0	0
M. margaritifera 312832713	0	0	0	0	0	0	0	0	0	0	0	0	0	0	0	0	0	0	0	0	0	0	0	0	0	0	0	0	0	0	0	0	0	0	0	0	0	0	0	0	0	0	0	0	0	0	0	0	0
M. margaritifera 312836013	0	0	0	0	0	0	0	0	0	0	0	0	0	0	0	0	0	0	0	0	0	0	0	0	0	0	0	0	0	0	0	0	0	0	0	0	0	0	0	0	0	0	0	0	0	0	0	0	0
M. margaritifera 312832862	0	0	0	0	0	0	0	0	0	0	0	0	0	0	0	0	0	0	0	0	0	0	0	0	0	0	0	0	0	0	0	0	0	0	0	0	0	0	0	0	0	0	0	0	0	0	0	0	0
M. margaritifera 312835892	0	0	0	0	0	0	0	0	0	0	0	0	0	0	0	0	0	0	0	0	0	0	0	0	0	0	0	0	0	0	0	0	0	0	0	0	0	0	0	0	0	0	0	0	0	0	0	0	0
M. margaritifera 312833442	0	0	0	0	0	0	0	0	0	0	0	0	0	0	0	0	0	0	0	0	0	0	0	0	0	0	0	0	0	0	0	0	0	0	0	0	0	0	0	0	0	0	0	0	0	0	0	0	0
M. margaritifera 312832411	0	0	0	0	0	0	0	0	0	0	0	0	0	0	0	0	0	0	0	0	0	0	0	0	0	0	0	0	0	0	0	0	0	0	0	0	0	0	0	0	0	0	0	0	1	0	0	0	0
M. margaritifera 312833630	0	0	0	0	0	0	0	0	0	0	0	0	0	0	0	0	0	0	0	0	0	0	0	0	0	0	0	0	0	0	0	0	0	0	0	0	0	0	0	0	0	0	0	0	0	0	0	0	0
M. margaritifera 312834843	0	0	0	0	0	0	0	0	0	0	0	0	0	0	0	0	0	0	0	0	0	0	0	0	0	0	0	0	0	0	0	0	0	0	0	0	0	0	0	0	0	0	0	0	0	0	0	0	0
M. margaritifera 312832416	0	0	0	0	0	0	0	0	0	0	0	0	0	0	0	0	0	0	0	0	0	0	0	0	0	0	0	0	0	0	1	0	0	0	0	0	0	0	0	0	0	0	0	0	0	0	0	0	0
P. auricularius 121464063	0	0	0	0	0	0	0	0	0	0	0	0	0	0	0	0	0	0	0	0	0	0	0	0	0	0	0	0	0	0	0	0	0	0	0	0	0	0	0	0	0	0	0	0	0	0	0	0	0
P. auricularius 312835451	0	0	0	0	0	0	0	0	0	0	0	0	0	0	0	0	0	0	0	0	0	0	0	0	0	0	0	0	0	0	0	0	0	0	0	0	0	0	0	0	0	0	0	0	0	0	0	0	0
P. auricularius 121459237	0	0	0	0	0	0	0	0	0	0	0	0	0	0	0	0	0	0	0	0	0	0	0	0	0	0	0	0	0	0	0	0	0	0	0	0	0	0	0	0	0	0	0	0	0	0	0	0	0
P. auricularius 218926993	0	0	0	0	0	0	0	0	0	0	0	0	0	0	0	0	0	0	0	0	0	0	0	0	0	0	0	0	0	0	0	0	0	0	0	0	0	0	0	0	0	0	0	0	0	0	0	0	0
P. auricularius 312835716	0	0	0	0	0	0	0	0	0	0	0	0	0	0	0	0	0	0	0	0	0	0	0	0	0	0	0	0	0	0	0	0	0	0	0	0	0	0	0	0	0	0	0	0	0	0	0	0	0
P. auricularius 312834881	0	0	1	0	0	0	0	0	0	0	0	0	0	0	0	0	0	0	0	0	0	0	0	0	0	0	0	0	0	0	0	0	0	0	0	0	0	0	0	0	0	0	0	0	0	0	0	0	0
P. auricularius 312836432	0	1	0	0	0	0	0	0	0	0	0	0	0	0	0	0	0	0	0	0	0	0	0	0	0	0	0	0	0	0	0	0	0	0	0	0	0	0	0	0	0	0	0	0	0	0	0	0	0
P. auricularius 312833634	0	0	0	0	0	0	0	0	0	0	0	0	0	1	0	0	0	0	0	0	0	0	0	0	0	0	0	0	0	0	0	0	0	0	0	0	0	0	0	0	0	0	0	0	0	0	0	0	0
P. auricularius 262319994	0	0	0	0	0	1	0	0	0	0	0	0	0	0	0	0	0	0	0	0	0	0	0	0	0	0	0	0	0	0	0	0	0	0	0	0	0	0	0	0	0	0	0	0	0	0	0	0	0
P. auricularius 262326456	0	0	0	0	0	0	0	0	0	0	0	0	0	0	0	0	0	0	0	0	0	0	0	0	0	0	0	0	0	0	0	0	0	0	0	0	0	0	0	0	0	0	0	0	0	0	0	0	0
P. auricularius 312833977	0	0	0	0	0	0	0	1	0	0	0	0	0	0	0	0	0	0	0	0	0	0	0	0	0	0	0	0	0	0	0	0	0	0	0	0	0	0	0	0	0	0	0	0	0	0	0	0	0
P. auricularius 212817091	0	0	0	0	0	0	0	0	0	0	0	0	0	0	0	0	0	0	0	0	0	0	0	0	0	0	0	0	0	0	0	0	0	0	0	0	0	0	0	0	0	0	0	0	0	0	0	0	0
P. auricularius 212814500	0	0	0	0	0	0	0	0	0	0	0	0	0	0	0	0	0	0	0	0	0	0	0	0	0	0	0	0	0	0	0	0	0	0	0	0	0	0	0	0	0	0	0	0	0	0	0	0	0
P. auricularius 262319601	0	0	0	0	0	0	0	0	0	0	0	0	0	0	0	0	0	0	0	0	0	0	0	0	0	0	0	0	0	0	0	0	0	0	0	0	0	0	0	0	0	0	0	0	0	0	0	0	0
P. auricularius 212831670	0	0	0	0	0	0	0	0	0	0	0	0	0	0	0	0	0	0	0	1	0	0	0	0	0	0	0	0	0	0	0	0	0	0	0	0	0	0	0	0	0	0	0	0	0	0	0	0	0
P. auricularius 262320326	0	0	0	0	0	0	0	0	0	0	0	0	0	0	0	0	0	0	0	0	0	0	0	0	0	0	0	0	0	0	0	0	0	0	0	0	0	0	0	0	0	0	0	0	0	0	0	0	0
P. auricularius 212830777	0	0	0	0	0	0	0	0	0	0	0	0	0	0	0	0	0	0	0	0	0	0	0	0	0	0	0	0	0	0	0	0	1	0	0	0	0	0	0	0	0	0	0	0	0	0	0	0	0
P. auricularius 260748438	0	0	0	0	0	0	0	0	0	0	0	0	0	0	0	0	0	0	0	0	0	0	0	0	0	0	0	0	0	0	0	0	0	0	0	0	0	0	0	0	0	0	0	0	0	0	0	0	0
P. auricularius 312836546	0	0	0	0	0	0	0	0	0	0	0	0	0	0	0	0	0	0	0	0	0	0	0	0	0	0	0	0	0	0	0	0	0	0	0	0	0	0	0	0	1	0	0	0	0	0	0	0	0
P. auricularius 262319165	0	0	0	0	0	0	0	0	0	0	0	0	0	0	0	0	0	0	0	0	1	0	0	0	0	0	0	0	0	0	0	0	0	0	0	0	0	0	0	0	0	0	0	0	0	0	0	0	0
P. auricularius 194265046	0	0	0	0	0	0	0	0	0	0	0	0	0	0	0	0	0	0	0	0	0	0	0	0	0	0	0	0	0	0	0	0	0	0	0	0	0	0	0	0	0	0	0	0	0	0	0	0	0
P. auricularius 313281399	0	0	0	0	0	0	0	0	0	0	0	0	0	0	0	0	0	0	0	0	0	0	0	0	0	0	0	0	0	0	0	0	0	0	0	0	0	0	0	0	0	0	0	0	0	0	0	0	0
P. auricularius 313275353	0	0	0	0	0	0	0	0	0	0	0	0	0	0	0	0	0	0	0	0	0	0	0	0	0	0	0	0	0	0	0	0	0	0	0	0	0	0	0	0	0	0	0	0	0	0	0	0	0
P. auricularius 313285069	0	0	0	0	0	0	0	0	0	0	0	0	0	0	0	0	0	0	0	0	0	0	0	0	0	0	0	0	0	0	0	0	0	0	0	0	0	0	0	0	0	0	0	0	0	0	0	0	0
P. auricularius 313314127	0	0	0	0	0	0	0	0	0	0	0	0	0	0	0	0	0	0	0	0	0	0	0	0	0	0	0	0	0	0	0	0	0	0	0	0	0	0	0	0	0	0	0	0	0	0	0	0	0
P. auricularius 313293775	0	0	0	0	0	0	0	0	0	0	0	0	0	0	0	0	0	0	0	0	0	0	0	0	0	0	0	0	0	0	0	0	0	0	0	0	0	0	0	0	0	0	0	0	0	0	0	0	0
P. auricularius 312836493	0	0	0	0	0	0	0	0	0	0	0	0	0	0	0	0	0	0	0	0	0	0	0	0	0	0	0	0	0	1	0	0	0	0	0	0	0	0	0	0	0	0	0	0	0	0	0	0	0
P. auricularius 312831970	0	0	0	0	0	0	0	0	0	0	0	0	0	0	0	0	0	0	0	0	0	0	0	0	0	0	0	0	0	0	0	0	0	0	0	0	0	0	0	0	0	0	0	0	0	0	0	0	0
P. auricularius 121471512	0	0	0	0	0	0	0	0	0	0	0	0	0	0	0	0	0	0	0	0	0	0	0	0	0	0	0	0	0	0	0	0	0	0	0	0	0	0	0	0	0	0	0	0	0	0	0	0	0
O. edulis 260743423	0	0	0	0	0	0	0	0	0	0	0	0	0	0	0	0	0	0	0	0	0	0	0	0	0	0	0	0	0	0	0	0	0	0	0	0	0	0	0	0	0	0	0	0	0	0	0	0	0
O. edulis 313323175	0	0	0	0	0	0	0	0	0	0	0	0	0	0	0	0	0	0	0	0	0	0	0	0	0	0	0	0	0	0	0	0	0	0	0	0	0	0	0	0	0	0	0	0	0	0	0	0	0
O. edulis 163359940	0	0	0	0	0	0	0	0	0	0	0	0	0	0	0	0	0	0	0	0	0	0	0	0	0	0	0	0	0	0	0	0	0	0	0	0	0	0	0	0	0	0	0	0	0	0	0	0	0
O. edulis 163359939	0	0	0	0	0	0	0	0	0	0	0	0	0	0	0	0	0	0	0	0	0	0	0	0	0	0	0	0	0	0	0	0	0	0	0	0	0	0	0	0	0	0	0	0	0	0	0	0	0
O. edulis 163544823	0	0	0	0	0	0	0	0	0	0	0	0	0	0	0	0	0	0	0	0	0	0	0	0	0	0	0	0	0	0	0	0	0	0	0	0	0	0	0	0	0	0	0	0	0	0	0	0	0
O. edulis 163544824	0	0	0	0	0	0	0	0	0	0	0	0	0	0	0	0	0	0	0	0	0	0	0	0	0	0	0	0	0	0	0	0	0	0	0	0	0	0	0	0	0	0	0	0	0	0	0	0	0
O. edulis 163471991	0	0	0	0	0	0	0	0	0	0	0	0	0	0	0	0	0	0	0	0	0	0	0	0	0	0	0	0	0	0	0	0	0	0	0	0	0	0	0	0	0	0	0	0	0	0	0	0	0
O. edulis 260745314	0	0	0	0	0	0	0	0	0	0	0	0	0	0	0	0	0	0	0	0	0	0	0	0	0	0	0	0	0	0	0	0	0	0	0	0	0	0	0	0	0	0	0	0	0	0	0	0	0
O. edulis 164574547	0	0	0	0	0	0	0	0	0	0	0	0	0	0	0	0	0	0	0	0	0	0	0	0	0	0	0	0	0	0	0	0	0	0	0	0	0	0	0	0	0	0	0	0	0	0	0	0	0
O. edulis 260627004	0	0	0	0	0	0	0	0	0	0	0	0	0	0	0	0	0	0	0	0	0	0	0	0	0	0	0	0	0	0	0	0	0	0	0	0	0	0	0	0	0	0	0	0	0	0	0	0	0
O. edulis 313315804	0	0	0	0	0	0	0	0	0	0	0	0	0	0	0	0	0	0	0	0	0	0	0	0	0	0	0	0	0	0	0	0	0	0	0	0	0	0	0	0	0	0	0	0	0	0	0	0	0
O. edulis 313283260	0	0	0	0	0	0	0	0	0	0	0	0	0	0	0	0	0	0	0	0	0	0	0	0	0	0	0	0	0	0	0	0	0	0	0	0	0	0	0	0	0	0	0	0	0	0	0	0	0
O. edulis 313286817	0	0	0	0	0	0	0	0	0	0	0	0	0	0	0	0	0	0	0	0	0	0	0	0	0	0	0	0	0	0	0	0	0	0	0	0	0	0	0	0	0	0	0	0	0	0	0	0	0
O. edulis 163396073	0	0	0	0	0	0	0	0	0	0	0	0	0	0	0	0	0	0	0	0	0	0	0	0	0	0	0	0	0	0	0	0	0	0	0	0	0	0	0	0	0	0	0	0	0	0	0	0	0
O. edulis 163396990	0	0	0	0	0	0	0	0	0	0	0	0	0	0	0	0	0	0	0	0	0	0	0	0	0	0	0	0	0	0	0	0	0	0	0	0	0	0	0	0	0	0	0	0	0	0	0	0	0
O. edulis 22598612	0	0	0	0	0	0	0	0	0	0	0	0	0	0	0	0	0	0	0	0	0	0	0	0	0	0	0	0	0	0	0	0	0	0	0	0	0	0	0	0	0	0	0	0	0	0	0	0	0
O. edulis 22598130	0	0	0	0	0	0	0	0	0	0	0	0	0	0	0	0	0	0	0	0	0	0	0	0	0	0	0	0	0	0	0	0	0	0	0	0	0	0	0	0	0	0	0	0	0	0	0	0	0
O. edulis 82858311	0	0	0	0	0	0	0	0	0	0	0	0	0	0	0	0	0	0	0	0	0	0	0	0	0	0	0	0	0	0	0	0	0	0	0	0	0	0	0	0	0	0	0	0	0	0	0	0	0
O. edulis 82858151	0	0	0	0	0	0	0	0	0	0	0	0	0	0	0	0	0	0	0	0	0	0	0	0	0	0	0	0	0	0	0	0	0	0	0	0	0	0	0	0	0	0	0	0	0	0	0	0	0
O. edulis 82858302	0	0	0	0	0	0	0	0	0	0	0	0	0	0	0	0	0	0	0	0	0	0	0	0	0	0	0	0	0	0	0	0	0	0	0	0	0	0	0	0	0	0	0	0	0	0	0	0	0
O. edulis 53552492	0	0	0	0	0	0	0	0	0	0	0	0	0	0	0	0	0	0	0	0	0	0	0	0	0	0	0	0	0	0	0	0	0	0	0	0	0	0	0	0	0	0	0	0	0	0	0	0	0
O. edulis 262326454	0	0	0	0	0	0	0	0	0	0	0	0	0	0	0	0	0	0	0	0	0	0	0	0	0	0	0	0	0	0	0	0	0	0	0	0	0	0	0	0	0	0	0	0	0	0	0	0	0
O. edulis 913391939	0	0	0	0	0	0	0	0	0	0	0	0	0	0	0	0	0	0	0	0	0	0	0	0	0	0	0	0	0	0	0	0	0	0	0	0	0	0	0	0	0	0	0	0	0	0	0	0	0
O. edulis 31902282	0	0	0	0	0	0	0	0	0	0	0	0	0	0	0	0	0	0	0	0	0	0	0	0	0	0	0	0	0	0	0	0	0	0	0	0	0	0	0	0	0	0	0	0	0	0	0	0	0
O. edulis 378921852	0	0	0	0	0	0	0	0	0	0	0	0	0	0	0	0	0	0	0	0	0	0	0	0	0	0	0	0	0	0	0	0	0	0	0	0	0	0	0	0	0	0	0	0	0	0	0	0	0
O. edulis 33382110	0	0	0	0	0	0	0	0	0	0	0	0	0	0	0	0	0	0	0	0	0	0	0	0	0	0	0	0	0	0	0	0	0	0	0	0	0	0	0	0	0	0	0	0	0	0	0	0	0
O. edulis 82858139	0	0	0	0	0	0	0	0	0	0	0	0	0	0	0	0	0	0	0	0	0	0	0	0	0	0	0	0	0	0	0	0	0	0	0	0	0	0	0	0	0	0	0	0	0	0	0	0	0
O. edulis 149775310	0	0	0	0	0	0	0	0	0	0	0	0	0	0	0	0	0	0	0	0	0	0	0	0	0	0	0	0	0	0	0	0	0	0	0	0	0	0	0	0	0	0	0	0	0	0	0	0	0
O. edulis 313356090	0	0	0	0	0	0	0	0	0	0	0	0	0	0	0	0	0	0	0	0	0	0	0	0	0	0	0	0	0	0	0	0	0	0	0	0	0	0	0	0	0	0	0	0	0	0	0	0	0
O. edulis 164577050	0	0	0	0	0	0	0	0	0	0	0	0	0	0	0	0	0	0	0	0	0	0	0	0	0	0	0	0	0	0	0	0	0	0	0	0	0	0	0	0	0	0	0	0	0	0	0	0	0
O. edulis 313359750	0	0	0	0	0	0	0	0	0	0	0	0	0	0	0	0	0	0	0	0	0	0	0	0	0	0	0	0	0	0	0	0	0	0	0	0	0	0	0	0	0	0	0	0	0	0	0	0	0
O. edulis 152815281	0	0	0	0	0	0	0	0	0	0	0	0	0	0	0	0	0	0	0	0	0	0	0	0	0	0	0	0	0	0	0	0	0	0	0	0	0	0	0	0	0	0	0	0	0	0	0	0	0
O. edulis 313384698	0	0	0	0	0	0	0	0	0	0	0	0	0	0	0	0	0	0	0	0	0	0	0	0	0	0	0	0	0	0	0	0	0	0	0	0	0	0	0	0	0	0	0	0	0	0	0	0	0
O. edulis 215291018	0	0	0	0	0	0	0	0	0	0	0	0	0	0	0	0	0	0	0	0	0	0	0	0	1	0	0	0	0	0	0	0	0	0	0	0	0	0	0	0	0	0	0	0	0	0	0	0	0
O. edulis 260741919	0	0	0	0	0	0	0	0	0	0	0	0	0	0	0	0	0	0	0	0	0	0	0	0	0	0	0	0	0	0	0	0	0	0	0	0	0	0	0	0	0	0	0	0	0	0	0	0	0
O. edulis 313340890	0	0	0	0	0	0	0	0	0	0	0	0	0	0	0	0	0	0	0	0	0	0	0	0	0	0	0	0	0	0	0	0	0	0	0	0	0	0	0	0	0	0	0	0	0	0	0	0	0
O. edulis 168496031	0	0	0	0	0	0	0	0	0	0	0	0	0	0	0	0	0	0	0	0	0	0	0	0	0	0	0	0	0	0	0	0	0	0	0	0	0	0	0	0	0	0	0	0	0	0	0	0	0
O. edulis 313312084	0	0	0	0	0	0	0	0	0	0	0	0	0	0	0	0	0	0	0	0	0	0	0	0	0	0	0	0	0	0	0	0	0	0	0	0	0	0	0	0	0	0	0	0	0	0	0	0	0
O. edulis 313315805	0	0	0	0	0	0	0	0	0	0	0	0	0	0	0	0	0	0	0	0	0	0	0	0	0	0	0	0	0	0	0	0	0	0	0	0	0	0	0	0	0	0	0	0	0	0	0	0	0
O. edulis 313371074	0	0	0	0	0	0	0	0	0	0	0	0	0	0	0	0	0	0	0	0	0	0	0	0	0	0	0	0	0	0	0	0	0	0	0	0	0	0	0	0	0	0	0	0	0	0	0	0	0
O. edulis 313315028	0	0	0	0	0	0	0	0	0	0	0	0	0	0	0	0	0	0	0	0	0	0	0	0	0	0	0	0	0	0	0	0	0	0	0	0	0	0	0	0	0	0	0	0	0	0	0	0	0
O. edulis 313384983	0	0	0	0	0	0	0	0	0	0	0	0	0	0	0	0	0	0	0	0	0	0	0	0	0	0	0	0	0	0	0	0	0	0	0	0	0	0	0	0	0	0	0	0	0	0	0	0	0
O. edulis 164582378	0	0	0	0	0	0	0	0	0	0	0	0	0	0	0	0	0	0	0	0	0	0	0	0	0	0	0	0	0	0	0	0	0	0	0	0	0	0	0	0	0	0	0	0	0	0	0	0	0
O. edulis 163481952	0	0	0	0	0	0	0	0	0	0	0	0	0	0	0	0	0	0	0	0	0	0	0	0	0	0	0	0	0	0	0	0	0	0	0	0	0	0	0	0	0	0	0	0	0	0	0	0	0
O. edulis 163313479	0	0	0	0	0	0	0	0	0	0	0	0	0	0	0	0	0	0	0	0	0	0	0	0	0	0	0	0	0	0	0	0	0	0	0	0	0	0	0	0	0	0	0	0	0	0	0	0	0
M. modiolus 171869820	0	0	0	0	0	0	0	0	0	0	0	0	0	0	0	0	0	0	0	0	0	0	0	0	0	0	0	0	0	0	0	0	0	0	0	0	0	0	0	0	0	0	0	0	0	0	0	0	0
M. modiolus 262327552	0	0	0	0	0	0	0	0	0	0	0	0	0	0	0	0	0	0	0	0	0	0	0	0	0	0	0	0	0	0	0	0	0	0	0	0	0	0	0	0	0	0	0	0	0	1	0	0	0
M. modiolus 152015011	0	0	0	0	0	0	0	0	0	0	0	0	0	0	0	0	0	0	0	0	0	0	0	0	0	0	0	0	0	0	0	0	0	0	0	0	0	0	0	0	0	0	0	0	0	0	0	0	0
M. modiolus 262327125	0	0	0	0	0	0	0	0	0	0	0	0	0	0	0	0	0	0	0	0	0	0	0	0	0	0	0	0	0	0	0	0	0	0	0	0	0	0	0	0	0	0	0	0	0	0	0	0	0
M. modiolus 262319165	0	0	0	0	0	0	0	0	0	0	0	0	0	0	0	0	0	0	0	0	1	0	0	0	0	0	0	0	0	0	0	0	0	0	0	0	0	0	0	0	0	0	0	0	0	0	0	0	0
M. modiolus 212814806	0	0	0	0	0	0	0	0	0	0	0	0	0	0	0	0	0	0	0	0	0	0	0	0	0	0	0	0	0	0	0	0	0	0	0	0	0	0	0	0	0	0	0	0	0	0	0	0	0
M. modiolus 262327333	0	0	0	0	0	0	0	0	0	0	0	0	0	0	0	0	0	0	0	0	0	1	0	0	0	0	0	0	0	0	0	0	0	0	0	0	0	0	0	0	0	0	0	0	0	0	0	0	0
M. modiolus 194266106	0	0	0	0	0	0	0	0	0	0	0	0	0	0	0	0	0	0	0	0	0	0	0	0	0	0	0	0	0	0	0	0	0	0	0	0	0	0	0	0	0	0	0	0	0	0	0	0	0
M. modiolus 212840395	0	0	0	0	0	0	0	0	0	0	0	0	0	0	0	0	0	0	0	0	0	0	0	0	0	0	0	0	0	0	0	0	0	0	0	0	0	0	0	0	0	0	0	0	0	0	0	0	0
M. modiolus 212830777	0	0	0	0	0	0	0	0	0	0	0	0	0	0	0	0	0	0	0	0	0	0	0	0	0	0	0	0	0	0	0	0	1	0	0	0	0	0	0	0	0	0	0	0	0	0	0	0	0
M. modiolus 149380953	0	0	0	0	0	0	0	0	0	0	0	0	0	0	0	0	0	0	0	0	0	0	0	0	0	0	0	0	0	0	0	0	0	0	0	0	0	0	0	0	0	0	0	0	0	0	0	0	0
M. modiolus 163340758	0	0	0	0	0	0	0	0	0	0	0	0	0	0	0	0	0	0	0	0	0	0	0	0	0	0	0	0	0	0	0	0	0	0	0	0	0	0	0	0	0	0	0	0	0	0	0	0	0
M. modiolus 145884038	0	0	0	0	0	0	0	0	0	0	0	0	0	0	0	0	0	0	0	0	0	0	0	0	0	0	0	0	0	0	0	0	0	0	0	0	0	0	0	0	0	0	0	0	0	0	0	0	0
M. modiolus 371843386	0	0	0	0	0	0	0	0	0	0	0	0	0	0	0	0	0	0	0	0	0	0	0	0	0	0	0	0	0	0	0	0	0	0	0	0	0	0	0	0	0	0	0	0	0	0	0	0	0
M. modiolus 163370322	0	0	0	0	0	0	0	0	0	0	0	0	0	0	0	0	0	0	0	0	0	0	0	0	0	0	0	0	0	0	0	0	0	0	0	0	0	0	0	0	0	0	0	0	0	0	0	0	0
M. modiolus 163372416	0	0	0	0	0	0	0	0	0	0	0	0	0	0	0	0	0	0	0	0	0	0	0	0	0	0	0	0	0	0	0	0	0	0	0	0	0	0	0	0	0	0	0	0	0	0	0	0	0
M. modiolus 160869337	0	0	0	0	0	0	0	0	0	0	0	0	0	0	0	0	0	0	0	0	0	0	0	0	0	0	0	0	0	0	0	0	0	0	0	0	0	0	0	0	0	0	0	0	0	0	0	0	0
M. modiolus 164571646	0	0	0	0	0	0	0	0	0	0	0	0	0	0	0	0	0	0	0	0	0	0	0	0	0	0	0	0	0	0	0	0	0	0	0	0	0	0	0	0	0	0	0	0	0	0	0	0	0
M. modiolus 388888749	0	0	0	0	0	0	0	0	0	0	0	0	0	0	0	0	0	0	0	0	0	0	0	0	0	0	0	0	0	0	0	0	0	0	0	0	0	0	0	0	0	0	0	0	0	0	0	0	0
HavA 312833977	0	0	0	0	0	0	0	1	0	0	0	0	0	0	0	0	0	0	0	0	0	0	0	0	0	0	0	0	0	0	0	0	0	0	0	0	0	0	0	0	0	0	0	0	0	0	0	0	0
HavA 312836546	0	0	0	0	0	0	0	0	0	0	0	0	0	0	0	0	0	0	0	0	0	0	0	0	0	0	0	0	0	0	0	0	0	0	0	0	0	0	0	0	1	0	0	0	0	0	0	0	0
HavA 312835028	1	0	0	0	0	0	0	0	0	0	0	0	0	0	0	0	0	0	0	0	0	0	0	0	0	0	0	0	0	0	0	0	0	0	0	0	0	0	0	0	0	0	0	0	0	0	0	0	0
HavA 312836366	0	0	0	0	0	0	0	0	0	0	0	0	0	0	0	0	0	0	0	0	0	0	0	0	0	0	0	0	0	0	0	0	0	0	0	0	0	0	0	0	0	0	0	0	0	0	0	0	0
HavA 312833634	0	0	0	0	0	0	0	0	0	0	0	0	0	1	0	0	0	0	0	0	0	0	0	0	0	0	0	0	0	0	0	0	0	0	0	0	0	0	0	0	0	0	0	0	0	0	0	0	0
HavA 312833428	0	0	0	0	0	0	0	0	0	0	0	0	0	0	0	0	0	0	0	0	0	0	0	0	0	0	0	0	0	0	0	0	0	0	0	0	0	0	0	0	0	0	0	0	0	0	0	0	0
HavA 299759194	0	0	0	0	0	0	0	0	0	0	0	0	0	0	0	0	0	0	0	0	0	0	0	0	0	0	0	0	0	0	0	0	0	0	0	0	0	0	0	0	0	0	0	0	0	0	0	0	0
HavA 215291018	0	0	0	0	0	0	0	0	0	0	0	0	0	0	0	0	0	0	0	0	0	0	0	0	1	0	0	0	0	0	0	0	0	0	0	0	0	0	0	0	0	0	0	0	0	0	0	0	0
HavA 58308577	0	0	0	0	0	0	0	0	0	0	0	0	0	0	0	0	0	0	0	0	0	0	0	0	0	0	0	0	0	0	0	0	0	0	0	0	0	0	0	0	0	0	0	0	0	0	0	0	0
HavA 262320845	0	0	0	0	0	0	0	0	0	0	0	0	0	0	0	0	0	0	0	0	0	0	0	0	0	0	0	0	0	0	0	0	0	0	0	0	0	0	0	0	0	0	0	0	0	0	0	0	0
HavA 58308905	0	0	0	0	0	0	0	0	0	0	0	0	0	0	0	0	0	0	0	0	0	0	0	0	0	0	0	0	0	0	0	0	0	0	0	0	0	0	0	0	0	0	0	0	0	0	0	0	0
HavA 262327333	0	0	0	0	0	0	0	0	0	0	0	0	0	0	0	0	0	0	0	0	0	1	0	0	0	0	0	0	0	0	0	0	0	0	0	0	0	0	0	0	0	0	0	0	0	0	0	0	0
HavA 215481542	0	0	0	0	0	0	0	0	0	0	0	0	0	0	0	0	0	0	0	0	0	0	0	0	0	0	0	0	0	0	0	0	0	0	0	0	0	0	0	0	0	0	0	0	0	0	0	0	0
HavA 312832047	0	0	0	0	1	0	0	0	0	0	0	0	0	0	0	0	0	0	0	0	0	0	0	0	0	0	0	0	0	0	0	0	0	0	0	0	0	0	0	0	0	0	0	0	0	0	0	0	0
HavA 215481508	0	0	0	0	0	0	0	0	0	0	0	0	0	0	0	0	0	0	0	0	0	0	0	0	0	0	0	0	0	0	0	0	0	0	0	0	0	0	0	0	0	0	0	0	0	0	0	0	0
HavA 262319165	0	0	0	0	0	0	0	0	0	0	0	0	0	0	0	0	0	0	0	0	1	0	0	0	0	0	0	0	0	0	0	0	0	0	0	0	0	0	0	0	0	0	0	0	0	0	0	0	0
HavA 58307328	0	0	0	0	0	0	0	0	0	0	0	0	0	0	0	0	0	0	0	0	0	0	0	0	0	0	0	0	0	0	0	0	0	0	0	0	0	0	0	0	0	0	0	0	0	0	0	0	0
HavA 58308234	0	0	0	0	0	0	0	0	0	0	0	0	0	0	0	0	0	0	0	0	0	0	0	0	0	0	0	0	0	0	0	0	0	0	0	0	0	0	0	0	0	0	0	0	0	0	0	0	0
HavA 58308070	0	0	0	0	0	0	0	0	0	0	0	0	0	0	0	0	0	0	0	0	0	0	0	0	0	0	0	0	0	0	0	0	0	0	0	0	0	0	0	0	0	0	0	0	0	0	0	0	0
HavA 215481696	0	0	0	0	0	0	0	0	0	0	0	0	0	0	0	0	0	0	0	0	0	0	0	0	0	0	0	0	0	0	0	0	0	0	0	0	0	0	0	0	0	0	0	0	0	0	0	0	0
HavA 58307564	0	0	0	0	0	0	0	0	0	0	0	0	0	0	0	0	0	0	0	0	0	0	0	0	0	0	0	0	0	0	0	0	0	0	0	0	0	0	0	0	0	0	0	0	0	0	0	0	0
HavA 215287583	0	0	0	0	0	0	0	0	0	0	0	0	0	0	0	0	0	0	0	0	0	0	0	0	0	0	0	0	0	0	0	0	0	0	0	0	0	0	0	0	0	0	1	0	0	0	0	0	0
HavA 312832411	0	0	0	0	0	0	0	0	0	0	0	0	0	0	0	0	0	0	0	0	0	0	0	0	0	0	0	0	0	0	0	0	0	0	0	0	0	0	0	0	0	0	0	0	1	0	0	0	0
HavA 262322314	0	0	0	0	0	0	0	0	0	0	0	0	0	0	0	0	0	0	0	0	0	0	0	0	0	0	0	0	0	0	0	0	0	0	0	0	0	0	0	0	0	0	0	0	0	0	0	0	0
HavA 163529387	0	0	0	0	0	0	0	0	0	0	0	0	0	0	0	0	0	0	0	0	0	0	0	0	0	0	0	0	0	0	0	0	0	0	0	0	0	0	0	0	0	0	0	0	0	0	0	0	0
HavA 312832251	0	0	0	0	0	0	0	0	0	0	0	0	0	0	0	0	0	0	0	0	0	0	0	0	0	0	0	0	0	0	0	0	0	0	0	0	0	0	0	0	0	0	0	0	0	0	0	0	0
HavA 312833630	0	0	0	0	0	0	0	0	0	0	0	0	0	0	0	0	0	0	0	0	0	0	0	0	0	0	0	0	0	0	0	0	0	0	0	0	0	0	0	0	0	0	0	0	0	0	0	0	0
HavA 312835032	0	0	0	0	0	0	0	0	0	0	0	0	0	0	0	0	0	0	0	0	0	0	0	0	0	0	0	0	0	0	0	0	0	0	0	0	0	0	0	0	0	0	0	0	0	0	0	0	0
HavA 312833820	0	0	0	0	0	0	0	0	0	0	0	0	0	0	0	0	0	0	0	0	0	0	0	0	0	0	0	0	0	0	0	0	0	0	0	0	0	0	0	0	0	0	0	0	0	0	0	0	0
HavA 312836115	0	0	0	0	0	0	0	0	0	0	0	0	0	0	0	0	0	0	0	0	0	0	0	0	0	0	0	0	0	0	0	0	0	0	0	0	0	0	0	0	0	0	0	0	0	0	0	0	0
HavA 312832416	0	0	0	0	0	0	0	0	0	0	0	0	0	0	0	0	0	0	0	0	0	0	0	0	0	0	0	0	0	0	1	0	0	0	0	0	0	0	0	0	0	0	0	0	0	0	0	0	0
HavA 163360711	0	0	0	0	0	0	0	0	0	0	0	0	0	0	0	0	0	0	0	0	0	0	0	0	0	0	0	0	0	0	0	0	0	0	0	0	0	0	0	0	0	0	0	0	0	0	0	0	0
HavA 163358339	0	0	0	0	0	0	0	0	0	0	0	0	0	0	0	0	0	0	0	0	0	0	0	0	0	0	0	0	0	0	0	0	0	0	0	0	0	0	0	0	0	0	0	0	0	0	0	0	0
HavA 163369652	0	0	0	0	0	0	0	0	0	0	0	0	0	0	0	0	0	0	0	0	0	0	0	0	0	0	0	0	0	0	0	0	0	0	0	0	0	0	0	0	0	0	0	0	0	0	0	0	0
HavA 163369454	0	0	0	0	0	0	0	0	0	0	0	0	0	0	0	0	0	0	0	0	0	0	0	0	0	0	0	0	0	0	0	0	0	0	0	0	0	0	0	0	0	0	0	0	0	0	0	0	0
HavA 163365235	0	0	0	0	0	0	0	0	0	0	0	0	0	0	0	0	0	0	0	0	0	0	0	0	0	0	0	0	0	0	0	0	0	0	0	0	0	0	0	0	0	0	0	0	0	0	0	0	0
HavA 163360712	0	0	0	0	0	0	0	0	0	0	0	0	0	0	0	0	0	0	0	0	0	0	0	0	0	0	0	0	0	0	0	0	0	0	0	0	0	0	0	0	0	0	0	0	0	0	0	0	0
HavA 163358338	0	0	0	0	0	0	0	0	0	0	0	0	0	0	0	0	0	0	0	0	0	0	0	0	0	0	0	0	0	0	0	0	0	0	0	0	0	0	0	0	0	0	0	0	0	0	0	0	0
HavA 163369455	0	0	0	0	0	0	0	0	0	0	0	0	0	0	0	0	0	0	0	0	0	0	0	0	0	0	0	0	0	0	0	0	0	0	0	0	0	0	0	0	0	0	0	0	0	0	0	0	0
HavA 163369653	0	0	0	0	0	0	0	0	0	0	0	0	0	0	0	0	0	0	0	0	0	0	0	0	0	0	0	0	0	0	0	0	0	0	0	0	0	0	0	0	0	0	0	0	0	0	0	0	0
HavA 163365236	0	0	0	0	0	0	0	0	0	0	0	0	0	0	0	0	0	0	0	0	0	0	0	0	0	0	0	0	0	0	0	0	0	0	0	0	0	0	0	0	0	0	0	0	0	0	0	0	0
HavA 312836560	0	0	0	0	0	0	0	0	0	0	0	0	0	0	0	0	0	0	0	0	0	0	0	0	0	0	0	0	0	0	0	0	0	0	0	0	0	0	0	0	0	0	0	0	0	0	0	0	0
HavA 145900823	0	0	0	0	0	0	0	0	0	0	0	0	0	0	0	0	0	0	0	0	0	0	0	0	0	0	0	0	0	0	0	0	0	0	0	0	0	0	0	0	0	0	0	0	0	0	0	0	0
HavA 145900069	0	0	0	0	0	0	0	0	0	0	0	0	0	0	0	0	0	0	0	0	0	0	0	0	0	0	0	0	0	0	0	0	0	0	0	0	0	0	0	0	0	0	0	0	0	0	0	0	0
HavA 393389672	0	0	0	0	0	0	0	0	0	0	0	0	0	0	0	0	0	0	0	0	0	0	0	0	0	0	0	0	0	0	0	0	0	0	0	0	0	0	0	0	0	0	0	0	0	0	0	0	0
HavA 121324402	0	0	0	0	0	0	0	0	0	0	0	0	0	0	0	0	0	0	0	0	0	0	0	0	0	0	0	0	0	0	0	0	0	0	0	0	0	0	0	0	0	0	0	0	0	0	0	0	0
HavA 121346906	0	0	0	0	0	0	0	0	0	0	0	0	0	0	0	0	0	0	0	0	0	0	0	0	0	0	0	0	0	0	0	0	0	0	0	0	0	0	0	0	0	0	0	0	0	0	0	0	0
HavA 121349959	0	0	0	0	0	0	0	0	0	0	0	0	0	0	0	0	0	0	0	0	0	0	0	0	0	0	0	0	0	0	0	0	0	0	0	0	0	0	0	0	0	0	0	0	0	0	0	0	0
HavB 312833977	0	0	0	0	0	0	0	1	0	0	0	0	0	0	0	0	0	0	0	0	0	0	0	0	0	0	0	0	0	0	0	0	0	0	0	0	0	0	0	0	0	0	0	0	0	0	0	0	0
HavB 312835028	1	0	0	0	0	0	0	0	0	0	0	0	0	0	0	0	0	0	0	0	0	0	0	0	0	0	0	0	0	0	0	0	0	0	0	0	0	0	0	0	0	0	0	0	0	0	0	0	0
HavB 312835577	0	0	0	0	0	0	0	0	0	0	0	0	0	0	0	0	0	0	0	0	0	0	0	0	0	0	0	0	0	0	0	0	0	0	0	0	0	0	0	0	0	0	0	0	0	0	0	0	0
HavB 312836546	0	0	0	0	0	0	0	0	0	0	0	0	0	0	0	0	0	0	0	0	0	0	0	0	0	0	0	0	0	0	0	0	0	0	0	0	0	0	0	0	1	0	0	0	0	0	0	0	0
HavB 312833634	0	0	0	0	0	0	0	0	0	0	0	0	0	1	0	0	0	0	0	0	0	0	0	0	0	0	0	0	0	0	0	0	0	0	0	0	0	0	0	0	0	0	0	0	0	0	0	0	0
HavB 312833428	0	0	0	0	0	0	0	0	0	0	0	0	0	0	0	0	0	0	0	0	0	0	0	0	0	0	0	0	0	0	0	0	0	0	0	0	0	0	0	0	0	0	0	0	0	0	0	0	0
HavB 312834881	0	0	1	0	0	0	0	0	0	0	0	0	0	0	0	0	0	0	0	0	0	0	0	0	0	0	0	0	0	0	0	0	0	0	0	0	0	0	0	0	0	0	0	0	0	0	0	0	0
HavB 312836366	0	0	0	0	0	0	0	0	0	0	0	0	0	0	0	0	0	0	0	0	0	0	0	0	0	0	0	0	0	0	0	0	0	0	0	0	0	0	0	0	0	0	0	0	0	0	0	0	0
HavB 58308905	0	0	0	0	0	0	0	0	0	0	0	0	0	0	0	0	0	0	0	0	0	0	0	0	0	0	0	0	0	0	0	0	0	0	0	0	0	0	0	0	0	0	0	0	0	0	0	0	0
HavB 58307564	0	0	0	0	0	0	0	0	0	0	0	0	0	0	0	0	0	0	0	0	0	0	0	0	0	0	0	0	0	0	0	0	0	0	0	0	0	0	0	0	0	0	0	0	0	0	0	0	0
HavB 58308577	0	0	0	0	0	0	0	0	0	0	0	0	0	0	0	0	0	0	0	0	0	0	0	0	0	0	0	0	0	0	0	0	0	0	0	0	0	0	0	0	0	0	0	0	0	0	0	0	0
HavB 58307141	0	0	0	0	0	0	0	0	0	0	0	0	0	0	0	0	0	0	0	0	0	0	0	0	0	0	0	0	0	0	0	0	0	0	0	0	0	0	0	0	0	0	0	0	0	0	0	0	0
HavB 260932086	0	0	0	0	0	0	0	0	0	0	0	0	0	0	0	0	0	0	0	0	0	0	0	0	0	0	0	0	0	0	0	0	0	0	0	0	0	0	0	0	0	0	0	0	0	0	0	0	0
HavB 215481508	0	0	0	0	0	0	0	0	0	0	0	0	0	0	0	0	0	0	0	0	0	0	0	0	0	0	0	0	0	0	0	0	0	0	0	0	0	0	0	0	0	0	0	0	0	0	0	0	0
HavB 215481696	0	0	0	0	0	0	0	0	0	0	0	0	0	0	0	0	0	0	0	0	0	0	0	0	0	0	0	0	0	0	0	0	0	0	0	0	0	0	0	0	0	0	0	0	0	0	0	0	0
HavB 215481542	0	0	0	0	0	0	0	0	0	0	0	0	0	0	0	0	0	0	0	0	0	0	0	0	0	0	0	0	0	0	0	0	0	0	0	0	0	0	0	0	0	0	0	0	0	0	0	0	0
HavB 58307530	0	0	0	0	0	0	0	0	0	0	0	0	0	0	0	0	0	0	0	0	0	0	0	0	0	0	0	0	0	0	0	0	0	0	0	0	0	0	0	0	0	0	0	0	0	0	0	0	0
HavB 262319165	0	0	0	0	0	0	0	0	0	0	0	0	0	0	0	0	0	0	0	0	1	0	0	0	0	0	0	0	0	0	0	0	0	0	0	0	0	0	0	0	0	0	0	0	0	0	0	0	0
HavB 238685612	0	0	0	0	0	0	0	0	0	0	0	0	0	0	0	0	0	0	0	0	0	0	0	0	0	0	0	0	0	0	0	0	0	0	0	0	0	0	0	0	0	0	0	0	0	0	0	0	0
HavB 312834873	0	0	0	0	0	0	0	0	0	0	0	0	0	0	0	1	0	0	0	0	0	0	0	0	0	0	0	0	0	0	0	0	0	0	0	0	0	0	0	0	0	0	0	0	0	0	0	0	0
HavB 312832899	0	0	0	0	0	0	0	0	0	0	0	0	0	0	0	0	0	0	0	0	0	0	0	0	0	0	0	0	0	0	0	0	0	0	0	0	0	0	0	0	0	0	0	0	0	0	0	0	0
HavB 212831670	0	0	0	0	0	0	0	0	0	0	0	0	0	0	0	0	0	0	0	1	0	0	0	0	0	0	0	0	0	0	0	0	0	0	0	0	0	0	0	0	0	0	0	0	0	0	0	0	0
HavB 312832411	0	0	0	0	0	0	0	0	0	0	0	0	0	0	0	0	0	0	0	0	0	0	0	0	0	0	0	0	0	0	0	0	0	0	0	0	0	0	0	0	0	0	0	0	1	0	0	0	0
HavB 215327110	0	0	0	0	0	0	0	0	0	0	0	0	0	0	0	0	0	0	0	0	0	0	0	0	0	0	0	0	0	0	0	0	0	0	0	0	0	0	0	0	0	0	0	0	0	0	0	0	0
HavB 163529387	0	0	0	0	0	0	0	0	0	0	0	0	0	0	0	0	0	0	0	0	0	0	0	0	0	0	0	0	0	0	0	0	0	0	0	0	0	0	0	0	0	0	0	0	0	0	0	0	0
HavB 163331945	0	0	0	0	0	0	0	0	0	0	0	0	0	0	0	0	0	0	0	0	0	0	0	0	0	0	0	0	0	0	0	0	0	0	0	0	0	0	0	0	0	0	0	0	0	0	0	0	0
HavB 312833294	0	0	0	0	0	0	0	0	0	0	0	0	0	0	0	0	0	0	0	0	0	0	0	0	0	0	0	0	0	0	0	0	0	0	0	0	0	0	0	0	0	0	0	0	0	0	0	0	1
HavB 58308234	0	0	0	0	0	0	0	0	0	0	0	0	0	0	0	0	0	0	0	0	0	0	0	0	0	0	0	0	0	0	0	0	0	0	0	0	0	0	0	0	0	0	0	0	0	0	0	0	0
HavB 58308070	0	0	0	0	0	0	0	0	0	0	0	0	0	0	0	0	0	0	0	0	0	0	0	0	0	0	0	0	0	0	0	0	0	0	0	0	0	0	0	0	0	0	0	0	0	0	0	0	0
HavB 291621365	0	0	0	0	0	0	0	0	0	0	0	0	0	0	0	0	0	0	0	0	0	0	0	0	0	0	0	0	0	0	0	0	0	0	0	0	0	0	0	0	0	0	0	0	0	0	0	0	0
HavB 312835846	0	0	0	0	0	0	0	0	0	0	0	0	0	0	0	0	0	0	0	0	0	0	0	0	0	0	0	0	0	0	0	0	0	0	0	0	0	0	0	0	0	0	0	0	0	0	0	0	0
HavB 312833630	0	0	0	0	0	0	0	0	0	0	0	0	0	0	0	0	0	0	0	0	0	0	0	0	0	0	0	0	0	0	0	0	0	0	0	0	0	0	0	0	0	0	0	0	0	0	0	0	0
HavB 308075738	0	0	0	0	0	0	0	0	0	0	0	0	0	0	0	0	0	0	0	0	0	0	0	0	0	0	0	0	0	0	0	0	0	0	0	0	0	0	0	0	0	0	0	0	0	0	0	0	0
HavB 312836115	0	0	0	0	0	0	0	0	0	0	0	0	0	0	0	0	0	0	0	0	0	0	0	0	0	0	0	0	0	0	0	0	0	0	0	0	0	0	0	0	0	0	0	0	0	0	0	0	0
HavB 312832416	0	0	0	0	0	0	0	0	0	0	0	0	0	0	0	0	0	0	0	0	0	0	0	0	0	0	0	0	0	0	1	0	0	0	0	0	0	0	0	0	0	0	0	0	0	0	0	0	0
HavB 312833820	0	0	0	0	0	0	0	0	0	0	0	0	0	0	0	0	0	0	0	0	0	0	0	0	0	0	0	0	0	0	0	0	0	0	0	0	0	0	0	0	0	0	0	0	0	0	0	0	0
HavB 215289300	0	0	0	0	0	0	0	0	0	0	0	0	0	0	0	0	0	0	0	0	0	0	0	0	0	0	0	0	0	0	0	0	0	0	0	0	0	0	0	0	0	0	0	0	0	0	0	0	0
HavB 121326581	0	0	0	0	0	0	0	0	0	0	0	0	0	0	0	0	0	0	0	0	0	0	0	0	0	0	0	0	0	0	0	0	0	0	0	0	0	0	0	0	0	0	0	0	0	0	0	0	0
HavC 312835028	1	0	0	0	0	0	0	0	0	0	0	0	0	0	0	0	0	0	0	0	0	0	0	0	0	0	0	0	0	0	0	0	0	0	0	0	0	0	0	0	0	0	0	0	0	0	0	0	0
HavC 312833634	0	0	0	0	0	0	0	0	0	0	0	0	0	1	0	0	0	0	0	0	0	0	0	0	0	0	0	0	0	0	0	0	0	0	0	0	0	0	0	0	0	0	0	0	0	0	0	0	0
HavC 312835577	0	0	0	0	0	0	0	0	0	0	0	0	0	0	0	0	0	0	0	0	0	0	0	0	0	0	0	0	0	0	0	0	0	0	0	0	0	0	0	0	0	0	0	0	0	0	0	0	0
HavC 312834711	0	0	0	0	0	0	0	0	0	0	0	0	0	0	0	0	0	0	0	0	0	0	0	0	0	0	0	0	0	0	0	0	0	0	0	0	0	0	0	0	0	0	0	0	0	0	0	0	0
HavC 312833428	0	0	0	0	0	0	0	0	0	0	0	0	0	0	0	0	0	0	0	0	0	0	0	0	0	0	0	0	0	0	0	0	0	0	0	0	0	0	0	0	0	0	0	0	0	0	0	0	0
HavC 312833977	0	0	0	0	0	0	0	1	0	0	0	0	0	0	0	0	0	0	0	0	0	0	0	0	0	0	0	0	0	0	0	0	0	0	0	0	0	0	0	0	0	0	0	0	0	0	0	0	0
HavC 312834327	0	0	0	1	0	0	0	0	0	0	0	0	0	0	0	0	0	0	0	0	0	0	0	0	0	0	0	0	0	0	0	0	0	0	0	0	0	0	0	0	0	0	0	0	0	0	0	0	0
HavC 312836546	0	0	0	0	0	0	0	0	0	0	0	0	0	0	0	0	0	0	0	0	0	0	0	0	0	0	0	0	0	0	0	0	0	0	0	0	0	0	0	0	1	0	0	0	0	0	0	0	0
HavC 325152144	0	0	0	0	0	0	0	0	0	0	0	0	0	0	0	0	0	0	0	0	0	0	0	0	0	0	0	0	0	0	0	0	0	0	0	0	0	0	0	0	0	0	0	0	0	0	0	0	0
HavC 212816630	0	0	0	0	0	0	0	0	0	0	0	0	0	0	0	0	0	0	0	0	0	0	0	0	0	0	0	0	0	0	0	0	0	0	0	0	0	0	0	0	0	0	0	0	0	0	0	0	0
HavC 58308577	0	0	0	0	0	0	0	0	0	0	0	0	0	0	0	0	0	0	0	0	0	0	0	0	0	0	0	0	0	0	0	0	0	0	0	0	0	0	0	0	0	0	0	0	0	0	0	0	0
HavC 58308070	0	0	0	0	0	0	0	0	0	0	0	0	0	0	0	0	0	0	0	0	0	0	0	0	0	0	0	0	0	0	0	0	0	0	0	0	0	0	0	0	0	0	0	0	0	0	0	0	0
HavC 212831670	0	0	0	0	0	0	0	0	0	0	0	0	0	0	0	0	0	0	0	1	0	0	0	0	0	0	0	0	0	0	0	0	0	0	0	0	0	0	0	0	0	0	0	0	0	0	0	0	0
HavC 312836366	0	0	0	0	0	0	0	0	0	0	0	0	0	0	0	0	0	0	0	0	0	0	0	0	0	0	0	0	0	0	0	0	0	0	0	0	0	0	0	0	0	0	0	0	0	0	0	0	0
HavC 312832047	0	0	0	0	1	0	0	0	0	0	0	0	0	0	0	0	0	0	0	0	0	0	0	0	0	0	0	0	0	0	0	0	0	0	0	0	0	0	0	0	0	0	0	0	0	0	0	0	0
HavC 212821018	0	0	0	0	0	0	0	0	0	0	0	0	0	0	0	0	0	0	0	0	0	0	0	0	0	1	0	0	0	0	0	0	0	0	0	0	0	0	0	0	0	0	0	0	0	0	0	0	0
HavC 312835032	0	0	0	0	0	0	0	0	0	0	0	0	0	0	0	0	0	0	0	0	0	0	0	0	0	0	0	0	0	0	0	0	0	0	0	0	0	0	0	0	0	0	0	0	0	0	0	0	0
HavC 312833524	0	0	0	0	0	0	0	0	0	0	0	0	0	0	0	0	0	0	0	0	0	0	0	0	0	0	0	0	0	0	0	0	0	0	0	0	0	0	0	0	0	0	0	0	0	0	0	0	0
HavC 58308905	0	0	0	0	0	0	0	0	0	0	0	0	0	0	0	0	0	0	0	0	0	0	0	0	0	0	0	0	0	0	0	0	0	0	0	0	0	0	0	0	0	0	0	0	0	0	0	0	0
HavC 262319165	0	0	0	0	0	0	0	0	0	0	0	0	0	0	0	0	0	0	0	0	1	0	0	0	0	0	0	0	0	0	0	0	0	0	0	0	0	0	0	0	0	0	0	0	0	0	0	0	0
HavC 312834873	0	0	0	0	0	0	0	0	0	0	0	0	0	0	0	1	0	0	0	0	0	0	0	0	0	0	0	0	0	0	0	0	0	0	0	0	0	0	0	0	0	0	0	0	0	0	0	0	0
HavC 262327333	0	0	0	0	0	0	0	0	0	0	0	0	0	0	0	0	0	0	0	0	0	1	0	0	0	0	0	0	0	0	0	0	0	0	0	0	0	0	0	0	0	0	0	0	0	0	0	0	0
HavC 58307564	0	0	0	0	0	0	0	0	0	0	0	0	0	0	0	0	0	0	0	0	0	0	0	0	0	0	0	0	0	0	0	0	0	0	0	0	0	0	0	0	0	0	0	0	0	0	0	0	0
HavC 212821474	0	0	0	0	0	0	0	0	0	0	0	0	0	0	0	0	0	0	0	0	0	0	0	0	0	0	0	0	0	0	0	0	0	0	0	0	0	0	0	0	0	0	0	0	0	0	0	0	0
HavC 238685612	0	0	0	0	0	0	0	0	0	0	0	0	0	0	0	0	0	0	0	0	0	0	0	0	0	0	0	0	0	0	0	0	0	0	0	0	0	0	0	0	0	0	0	0	0	0	0	0	0
HavC 58307328	0	0	0	0	0	0	0	0	0	0	0	0	0	0	0	0	0	0	0	0	0	0	0	0	0	0	0	0	0	0	0	0	0	0	0	0	0	0	0	0	0	0	0	0	0	0	0	0	0
HavC 312832899	0	0	0	0	0	0	0	0	0	0	0	0	0	0	0	0	0	0	0	0	0	0	0	0	0	0	0	0	0	0	0	0	0	0	0	0	0	0	0	0	0	0	0	0	0	0	0	0	0
HavC 194258150	0	0	0	0	0	0	0	0	0	0	0	0	0	0	0	0	0	0	0	0	0	0	0	0	0	0	0	0	0	0	0	0	0	0	0	0	0	0	0	0	0	0	0	0	0	0	0	0	0
HavC 325152080	0	0	0	0	0	0	0	0	0	0	0	0	0	0	0	0	0	0	0	0	0	0	0	0	0	0	0	0	0	0	0	0	0	0	0	0	0	0	0	0	0	0	0	0	0	0	0	0	0
HavC 312833630	0	0	0	0	0	0	0	0	0	0	0	0	0	0	0	0	0	0	0	0	0	0	0	0	0	0	0	0	0	0	0	0	0	0	0	0	0	0	0	0	0	0	0	0	0	0	0	0	0
HavC 262328906	0	0	0	0	0	0	0	0	0	0	0	0	0	0	0	0	0	0	0	0	0	0	0	0	0	0	0	0	0	0	0	0	0	0	0	0	0	0	0	0	0	0	0	0	0	0	0	0	0
HavC 163377836	0	0	0	0	0	0	0	0	0	0	0	0	0	0	0	0	0	0	0	0	0	0	0	0	0	0	0	0	0	0	0	0	0	0	0	0	0	0	0	0	0	0	0	0	0	0	0	0	0
HavC 189408730	0	0	0	0	0	0	0	0	0	0	0	0	0	0	0	0	0	0	0	0	0	0	0	0	0	0	0	0	0	0	0	0	0	0	0	0	0	0	0	0	0	0	0	0	0	0	0	0	0
HavC 189408734	0	0	0	0	0	0	0	0	0	0	0	0	0	0	0	0	0	0	0	0	0	0	0	0	0	0	0	0	0	0	0	0	0	0	0	0	0	0	0	0	0	0	0	0	0	0	0	0	0
HavC 312832251	0	0	0	0	0	0	0	0	0	0	0	0	0	0	0	0	0	0	0	0	0	0	0	0	0	0	0	0	0	0	0	0	0	0	0	0	0	0	0	0	0	0	0	0	0	0	0	0	0
HavC 312835846	0	0	0	0	0	0	0	0	0	0	0	0	0	0	0	0	0	0	0	0	0	0	0	0	0	0	0	0	0	0	0	0	0	0	0	0	0	0	0	0	0	0	0	0	0	0	0	0	0
HavC 308075738	0	0	0	0	0	0	0	0	0	0	0	0	0	0	0	0	0	0	0	0	0	0	0	0	0	0	0	0	0	0	0	0	0	0	0	0	0	0	0	0	0	0	0	0	0	0	0	0	0
HorA 215291018	0	0	0	0	0	0	0	0	0	0	0	0	0	0	0	0	0	0	0	0	0	0	0	0	1	0	0	0	0	0	0	0	0	0	0	0	0	0	0	0	0	0	0	0	0	0	0	0	0
HorA 149407444	0	0	0	0	0	0	0	0	0	0	0	0	0	0	0	0	0	0	0	0	0	0	0	0	0	0	0	0	0	0	0	0	0	0	0	0	0	0	0	0	0	0	0	0	0	0	0	0	0
HorA 157944922	0	0	0	0	0	0	0	0	0	0	0	0	0	0	0	0	0	0	0	0	0	0	0	0	0	0	0	0	0	0	0	0	0	0	0	0	0	0	0	0	0	0	0	0	0	0	0	0	0
HorA 299759194	0	0	0	0	0	0	0	0	0	0	0	0	0	0	0	0	0	0	0	0	0	0	0	0	0	0	0	0	0	0	0	0	0	0	0	0	0	0	0	0	0	0	0	0	0	0	0	0	0
HorA 215287583	0	0	0	0	0	0	0	0	0	0	0	0	0	0	0	0	0	0	0	0	0	0	0	0	0	0	0	0	0	0	0	0	0	0	0	0	0	0	0	0	0	0	1	0	0	0	0	0	0
HorA 215378308	0	0	0	0	0	0	0	0	0	0	0	0	0	0	0	0	0	0	0	0	0	0	0	0	0	0	0	0	0	0	0	0	0	0	0	0	0	0	0	0	0	0	0	0	0	0	0	0	0
HorA 282668940	0	0	0	0	0	0	0	0	0	0	0	0	0	0	0	0	0	0	0	0	0	0	0	0	0	0	0	0	0	0	0	0	0	0	0	0	0	0	0	0	0	0	0	0	0	0	0	0	0
HorA 215327106	0	0	0	0	0	0	0	0	0	0	0	0	0	0	0	0	0	0	0	0	0	0	0	0	0	0	0	0	0	0	0	0	0	0	0	0	0	0	0	0	0	0	0	0	0	0	0	0	0
HorA 110558850	0	0	0	0	0	0	0	0	0	0	0	0	0	0	0	0	0	0	0	0	0	0	0	0	0	0	0	0	0	0	0	0	0	0	0	0	0	0	0	0	0	0	0	0	0	0	0	0	0
HorA 393389672	0	0	0	0	0	0	0	0	0	0	0	0	0	0	0	0	0	0	0	0	0	0	0	0	0	0	0	0	0	0	0	0	0	0	0	0	0	0	0	0	0	0	0	0	0	0	0	0	0
HorA 148314381	0	0	0	0	0	0	0	0	0	0	0	0	0	0	0	0	0	0	0	0	0	0	0	0	0	0	0	0	0	0	0	0	0	0	0	0	0	0	0	0	0	0	0	0	0	0	0	0	0
HorA 163504041	0	0	0	0	0	0	0	0	0	0	0	0	0	0	0	0	0	0	0	0	0	0	0	0	0	0	0	0	0	0	0	0	0	0	0	0	0	0	0	0	0	0	0	0	0	0	0	0	0
HorB 157944922	0	0	0	0	0	0	0	0	0	0	0	0	0	0	0	0	0	0	0	0	0	0	0	0	0	0	0	0	0	0	0	0	0	0	0	0	0	0	0	0	0	0	0	0	0	0	0	0	0
HorB 215291018	0	0	0	0	0	0	0	0	0	0	0	0	0	0	0	0	0	0	0	0	0	0	0	0	1	0	0	0	0	0	0	0	0	0	0	0	0	0	0	0	0	0	0	0	0	0	0	0	0
HorB 312833977	0	0	0	0	0	0	0	1	0	0	0	0	0	0	0	0	0	0	0	0	0	0	0	0	0	0	0	0	0	0	0	0	0	0	0	0	0	0	0	0	0	0	0	0	0	0	0	0	0
HorB 312836493	0	0	0	0	0	0	0	0	0	0	0	0	0	0	0	0	0	0	0	0	0	0	0	0	0	0	0	0	0	1	0	0	0	0	0	0	0	0	0	0	0	0	0	0	0	0	0	0	0
HorB 312833820	0	0	0	0	0	0	0	0	0	0	0	0	0	0	0	0	0	0	0	0	0	0	0	0	0	0	0	0	0	0	0	0	0	0	0	0	0	0	0	0	0	0	0	0	0	0	0	0	0
HorC 215291018	0	0	0	0	0	0	0	0	0	0	0	0	0	0	0	0	0	0	0	0	0	0	0	0	1	0	0	0	0	0	0	0	0	0	0	0	0	0	0	0	0	0	0	0	0	0	0	0	0
HorC 215378308	0	0	0	0	0	0	0	0	0	0	0	0	0	0	0	0	0	0	0	0	0	0	0	0	0	0	0	0	0	0	0	0	0	0	0	0	0	0	0	0	0	0	0	0	0	0	0	0	0
HorC 215287583	0	0	0	0	0	0	0	0	0	0	0	0	0	0	0	0	0	0	0	0	0	0	0	0	0	0	0	0	0	0	0	0	0	0	0	0	0	0	0	0	0	0	1	0	0	0	0	0	0
HorC 296278102	0	0	0	0	0	0	0	0	0	0	0	0	0	0	0	0	0	0	0	0	0	0	0	0	0	0	0	0	0	0	0	0	0	0	0	0	0	0	0	0	0	0	0	0	0	0	0	0	0
HorC 215327106	0	0	0	0	0	0	0	0	0	0	0	0	0	0	0	0	0	0	0	0	0	0	0	0	0	0	0	0	0	0	0	0	0	0	0	0	0	0	0	0	0	0	0	0	0	0	0	0	0
HorC 110558850	0	0	0	0	0	0	0	0	0	0	0	0	0	0	0	0	0	0	0	0	0	0	0	0	0	0	0	0	0	0	0	0	0	0	0	0	0	0	0	0	0	0	0	0	0	0	0	0	0
HorC 393389672	0	0	0	0	0	0	0	0	0	0	0	0	0	0	0	0	0	0	0	0	0	0	0	0	0	0	0	0	0	0	0	0	0	0	0	0	0	0	0	0	0	0	0	0	0	0	0	0	0
HorC 215327110	0	0	0	0	0	0	0	0	0	0	0	0	0	0	0	0	0	0	0	0	0	0	0	0	0	0	0	0	0	0	0	0	0	0	0	0	0	0	0	0	0	0	0	0	0	0	0	0	0
HorC 262319165	0	0	0	0	0	0	0	0	0	0	0	0	0	0	0	0	0	0	0	0	1	0	0	0	0	0	0	0	0	0	0	0	0	0	0	0	0	0	0	0	0	0	0	0	0	0	0	0	0
HorC 312833977	0	0	0	0	0	0	0	1	0	0	0	0	0	0	0	0	0	0	0	0	0	0	0	0	0	0	0	0	0	0	0	0	0	0	0	0	0	0	0	0	0	0	0	0	0	0	0	0	0
PesB 262327747	0	0	0	0	0	0	0	0	0	0	0	0	0	0	0	0	0	0	0	0	0	0	0	0	0	0	0	0	0	0	0	0	0	0	0	0	0	0	0	0	0	0	0	0	0	0	0	0	0
PesB 312836213	0	0	0	0	0	0	0	0	0	0	0	0	0	0	0	0	0	0	0	0	0	0	0	0	0	0	0	0	0	0	0	0	0	0	0	0	0	0	0	0	0	0	0	0	0	0	0	0	0
PesB 312832049	0	0	0	0	0	0	0	0	0	0	0	0	0	0	0	0	0	0	0	0	0	0	0	0	0	0	0	0	0	0	0	0	0	0	0	0	0	0	0	0	0	0	0	0	0	0	0	0	0
PesB 312833645	0	0	0	0	0	0	0	0	0	0	0	0	0	0	0	0	0	0	0	0	0	0	0	0	0	0	0	0	0	0	0	0	0	0	0	0	0	0	0	0	0	0	0	0	0	0	0	0	0
PesB 312835028	1	0	0	0	0	0	0	0	0	0	0	0	0	0	0	0	0	0	0	0	0	0	0	0	0	0	0	0	0	0	0	0	0	0	0	0	0	0	0	0	0	0	0	0	0	0	0	0	0
PesB 215291018	0	0	0	0	0	0	0	0	0	0	0	0	0	0	0	0	0	0	0	0	0	0	0	0	1	0	0	0	0	0	0	0	0	0	0	0	0	0	0	0	0	0	0	0	0	0	0	0	0
PesB 312834881	0	0	1	0	0	0	0	0	0	0	0	0	0	0	0	0	0	0	0	0	0	0	0	0	0	0	0	0	0	0	0	0	0	0	0	0	0	0	0	0	0	0	0	0	0	0	0	0	0
PesB 215287583	0	0	0	0	0	0	0	0	0	0	0	0	0	0	0	0	0	0	0	0	0	0	0	0	0	0	0	0	0	0	0	0	0	0	0	0	0	0	0	0	0	0	1	0	0	0	0	0	0
PesB 168495854	0	0	0	0	0	0	0	0	0	0	0	0	0	0	0	0	0	0	0	0	0	0	0	0	0	0	0	0	0	0	0	0	0	0	0	0	0	0	0	0	0	0	0	0	0	0	0	0	0
PesB 313256112	0	0	0	0	0	0	0	0	0	0	0	0	0	0	0	0	0	0	0	0	0	0	0	0	0	0	0	0	0	0	0	0	0	0	0	0	0	0	0	0	0	0	0	0	0	0	0	0	0
PesB 260740462	0	0	0	0	0	0	0	0	0	0	0	0	0	0	0	0	0	0	0	0	0	0	0	0	0	0	0	0	0	0	0	0	0	0	0	0	0	0	0	0	0	0	0	0	0	0	0	0	0
PesB 115427125	0	0	0	0	0	0	0	0	0	0	0	0	0	0	0	0	0	0	0	0	0	0	0	0	0	0	0	0	0	0	0	0	0	0	0	0	0	0	0	0	0	0	0	0	0	0	0	0	0
PesB 58307141	0	0	0	0	0	0	0	0	0	0	0	0	0	0	0	0	0	0	0	0	0	0	0	0	0	0	0	0	0	0	0	0	0	0	0	0	0	0	0	0	0	0	0	0	0	0	0	0	0
PesB 58307784	0	0	0	0	0	0	0	0	0	0	0	0	0	0	0	0	0	0	0	0	0	0	0	0	0	0	0	0	0	0	0	0	0	0	0	0	0	0	0	0	0	0	0	0	0	0	0	0	0
PesB 58307033	0	0	0	0	0	0	0	0	0	0	0	0	0	0	0	0	0	0	0	0	0	0	0	0	0	0	0	0	0	0	0	0	0	0	0	0	0	0	0	0	0	0	0	0	0	0	0	0	0
PesB 58308905	0	0	0	0	0	0	0	0	0	0	0	0	0	0	0	0	0	0	0	0	0	0	0	0	0	0	0	0	0	0	0	0	0	0	0	0	0	0	0	0	0	0	0	0	0	0	0	0	0
PesB 58307210	0	0	0	0	0	0	0	0	0	0	0	0	0	0	0	0	0	0	0	0	0	0	0	0	0	0	0	0	0	0	0	0	0	0	0	0	0	0	0	0	0	0	0	0	0	0	0	0	0
[truncated: 441 more columns]

## Sheet: U. pictorum ASM_ESTs
Protein Group	Protein ID	Accession	-10lgP	Coverage (%)	Coverage (%) Unio ASM	Intensity Unio ASM	#Peptides	#Unique	#Spec Unio ASM	PTM	Avg. Mass	Description
1	1	312835028	232.89	48	48	0	69	7	185	Carbamidomethylation; Pyro-glu from Q; Oxidation (HW); Deamidation (NQ); 2 3-dihydro-2 2-dimethyl-7-benzofuranol N-methyl carbamate; 17 more	58871	FPM_M_01895 Mantle of freshwater pearl mussel cDNA library Hyriopsis cumingii cDNA 5' mRNA sequence
3	8	312836432	220.12	33	33	0	51	2	152	Carbamidomethylation; Pyro-glu from Q; Oxidation (HW); Deamidation (NQ); 2 3-dihydro-2 2-dimethyl-7-benzofuranol N-methyl carbamate; 18 more	52862	FPM_M_04325 Mantle of freshwater pearl mussel cDNA library Hyriopsis cumingii cDNA 5' mRNA sequence
5	14	312834881	193.25	31	31	0	41	36	69	Deamidation (NQ); 2 3-dihydro-2 2-dimethyl-7-benzofuranol N-methyl carbamate; Methylation(KR); Carbamylation; Formylation; 9 more	54483	FPM_M_00211 Mantle of freshwater pearl mussel cDNA library Hyriopsis cumingii cDNA 5' mRNA sequence
5	13	312834327	193.25	31	31	0	41	36	69	Deamidation (NQ); 2 3-dihydro-2 2-dimethyl-7-benzofuranol N-methyl carbamate; Methylation(KR); Carbamylation; Formylation (Protein N-term); 10 more	54604	FPM_M_01065 Mantle of freshwater pearl mussel cDNA library Hyriopsis cumingii cDNA 5' mRNA sequence
6	35	312832047	160.02	79	79	0	38	26	49	Carbamidomethylation; 2 3-dihydro-2 2-dimethyl-7-benzofuranol N-methyl carbamate; Acetylation (K); Methylation(KR); Carbamylation; 15 more	45618	FPM_M_01104 Mantle of freshwater pearl mussel cDNA library Hyriopsis cumingii cDNA 5' mRNA sequence
9	91	262319994	159.55	77	77	0	32	7	36	Carbamidomethylation; Deamidation (NQ); Acetylation (K); Dimethylation(KR); Methylation(KR); 17 more	52957	pmaximaP0013J08_670 Adult silver lipped oyster (Pinctada maxima) Pinctada maxima cDNA 5' mRNA sequence
16	75	262320398	152.97	81	81	0	24	2	27	Carbamidomethylation; Deamidation (NQ); Dimethylation(KR); Methylation(KR); Phosphorylation (STY); 10 more	36464	pmaximaP0014J14_454 Adult silver lipped oyster (Pinctada maxima) Pinctada maxima cDNA 5' mRNA sequence
10	34	312833977	151.17	51	51	0	20	18	32	Carbamidomethylation; Deamidation (NQ); Formylation; Deamidation (R); Dihydroxy; 6 more	47503	FPM_M_03566 Mantle of freshwater pearl mussel cDNA library Hyriopsis cumingii cDNA 5' mRNA sequence
17	41	262326668	146.12	54	54	0	23	2	28	Carbamidomethylation; Methylation(KR); Carbamylation; Formylation; Glycidamide adduct; 9 more	51386	pmaximaP0021O11_656 Adult silver lipped oyster (Pinctada maxima) Pinctada maxima cDNA 5' mRNA sequence
7	43	312834859	143.24	33	33	0	15	4	28	Carbamidomethylation; Oxidation (M); Deamidation (NQ); Carbamylation; Sodium adduct; 4 more	43723	FPM_M_01723 Mantle of freshwater pearl mussel cDNA library Hyriopsis cumingii cDNA 5' mRNA sequence
7	45	312832460	143.24	27	27	0	15	4	28	Carbamidomethylation; Oxidation (M); Deamidation (NQ); Carbamylation; Sodium adduct; 4 more	53287	FPM_M_01884 Mantle of freshwater pearl mussel cDNA library Hyriopsis cumingii cDNA 5' mRNA sequence
7	46	312835631	143.24	26	26	0	15	4	28	Carbamidomethylation; Oxidation (M); Deamidation (NQ); Carbamylation; Sodium adduct; 4 more	54482	FPM_M_02559 Mantle of freshwater pearl mussel cDNA library Hyriopsis cumingii cDNA 5' mRNA sequence
11	21	312836519	140.79	26	26	0	17	14	25	Carbamidomethylation; Pyro-glu from Q; Deamidation (NQ); Replacement of proton with ammonium ion; Amidation; 3 more	37723	FPM_M_04412 Mantle of freshwater pearl mussel cDNA library Hyriopsis cumingii cDNA 5' mRNA sequence
36	33	312833634	138.13	55	55	0	14	10	16	Deamidation (NQ); 2 3-dihydro-2 2-dimethyl-7-benzofuranol N-methyl carbamate; Acetylation (K); Dimethylation(KR); Methylation(KR); 7 more	55909	FPM_M_02904 Mantle of freshwater pearl mussel cDNA library Hyriopsis cumingii cDNA 5' mRNA sequence
12	100	238638885	137.8	46	46	0	24	24	30	Dimethylation(KR); Methylation(KR); Carbamylation; Phenethyl isothiocyanate; Dihydroxy; 6 more	72443	EST6151 cDNA library in Pinctada martensi Pinctada martensii cDNA clone CHIP_05_gastropod_03_73.SP6_A10.ab1 mRNA sequence
31	102	312834873	135.08	52	52	0	17	5	19	Acetylation (K); Methylation(KR); Carbamylation; Deamidation (R); Glycidamide adduct; 5 more	43981	FPM_M_00203 Mantle of freshwater pearl mussel cDNA library Hyriopsis cumingii cDNA 5' mRNA sequence
39	117	260742995	134.77	42	42	0	14	10	15	Deamidation (R); Carboxylation (DKW); Carboxymethyl (KW X@N-term); Propionamide (K X@N-term); O-Diisopropylphosphorylation; 4 more	48349	FP000267 Pascal Favrel cDNA library hemocyte (wy0aba) Crassostrea gigas cDNA clone wy0aba15e05 mRNA sequence
19	23	312835002	132.52	37	37	0	12	12	17	Carbamidomethylation; Oxidation (M); Deamidation (NQ); Carbamylation; Phosphorylation (STY); 4 more	58090	FPM_M_00335 Mantle of freshwater pearl mussel cDNA library Hyriopsis cumingii cDNA 5' mRNA sequence
19	24	312834262	132.52	35	35	0	12	12	17	Carbamidomethylation; Oxidation (M); Deamidation (NQ); Carbamylation; Phosphorylation (STY); 4 more	60871	FPM_M_00946 Mantle of freshwater pearl mussel cDNA library Hyriopsis cumingii cDNA 5' mRNA sequence
14	68	212831670	132.16	68	68	0	22	2	29	Carbamylation; Phosphorylation (STY); Replacement of proton with ammonium ion; Dihydroxy; Amidation; 11 more	66753	MUW12-F11.x1d-t SHGC-MUW Mytilus californianus cDNA 5' mRNA sequence
25	74	262319165	131.53	63	63	0	16	7	19	Deamidation (NQ); Dimethylation(KR); Methylation(KR); Carbamylation; Phosphorylation (STY); 4 more	37413	pmaximaP0006D09_471 Adult silver lipped oyster (Pinctada maxima) Pinctada maxima cDNA 5' mRNA sequence
21	90	262327333	129.93	35	35	0	18	13	21	Deamidation (NQ); 2 3-dihydro-2 2-dimethyl-7-benzofuranol N-methyl carbamate; Methylation(KR); Carbamylation; Phosphorylation (STY); 5 more	40936	pmaximaP0007G07_509 Adult silver lipped oyster (Pinctada maxima) Pinctada maxima cDNA 5' mRNA sequence
32	112	312831920	129.09	35	35	0	15	9	20	Carbamidomethylation; Acetylation (K); Methylation(KR); Carbamylation; Phosphorylation (STY); 8 more	37453	FPM_M_00818 Mantle of freshwater pearl mussel cDNA library Hyriopsis cumingii cDNA 5' mRNA sequence
37	27	262321105	124.45	49	49	0	15	2	18	Formylation; Dihydroxy; Ethylation; Ethyl amino; Octanoyl; 3 more	35923	pmaximaP0001I05_459 Adult silver lipped oyster (Pinctada maxima) Pinctada maxima cDNA 5' mRNA sequence
18	114	215291018	123.62	26	26	0	12	11	23	Carbamidomethylation; Oxidation (M); Deamidation (NQ); Methylation(KR); Carbamylation; 8 more	49416	ABLSL5-E9-T7.ab1 Haliotis discus hannai cold-shock subtracted cDNA library Haliotis discus hannai cDNA mRNA sequence
30	108	212821018	120.81	63	63	0	16	4	20	Phosphorylation (STY); Replacement of proton with ammonium ion; Dihydroxy; Amidation; Dehydration; 7 more	50708	MUS15-I15.x1d-t SHGC-MUS Mytilus californianus cDNA 5' mRNA sequence
24	15	312836598	117.92	47	47	0	17	17	22	Carbamidomethylation; Pyro-glu from Q; Oxidation (HW); Dimethylation(KR); Carbamylation; 2 more	48383	FPM_M_04755 Mantle of freshwater pearl mussel cDNA library Hyriopsis cumingii cDNA 5' mRNA sequence
24	16	312832625	117.92	47	47	0	17	17	22	Carbamidomethylation; Pyro-glu from Q; Oxidation (HW); Dimethylation(KR); Carbamylation; 2 more	48717	FPM_M_04752 Mantle of freshwater pearl mussel cDNA library Hyriopsis cumingii cDNA 5' mRNA sequence
24	17	312834649	117.92	45	45	0	17	17	22	Carbamidomethylation; Pyro-glu from Q; Oxidation (HW); Dimethylation(KR); Carbamylation; 2 more	51008	FPM_M_01495 Mantle of freshwater pearl mussel cDNA library Hyriopsis cumingii cDNA 5' mRNA sequence
8	50	312836493	117.87	24	24	0	15	15	23	Oxidation (M); Deamidation (NQ); Carbamylation; Phosphorylation (STY); Glycidamide adduct; 4 more	49623	FPM_M_04386 Mantle of freshwater pearl mussel cDNA library Hyriopsis cumingii cDNA 5' mRNA sequence
42	105	312832416	115.98	19	19	0	5	5	11	Carbamidomethylation; Amidation	42816	FPM_M_01840 Mantle of freshwater pearl mussel cDNA library Hyriopsis cumingii cDNA 5' mRNA sequence
23	77	312833463	114.03	33	33	0	10	7	14	Carbamidomethylation; Phosphorylation (STY); Replacement of proton with ammonium ion; Dihydroxy; Amidation; 3 more	34442	FPM_M_02522 Mantle of freshwater pearl mussel cDNA library Hyriopsis cumingii cDNA 5' mRNA sequence
28	55	212830777	113.44	50	50	0	15	2	21	Pyro-glu from Q; Carbamylation; Phosphorylation (STY); Replacement of proton with ammonium ion; Dihydroxy; 8 more	64331	MUW02-L23.x1d-t SHGC-MUW Mytilus californianus cDNA 5' mRNA sequence
43	20	312832167	109.32	35	35	0	11	11	14	Carbamidomethylation; Oxidation (M); Carbamylation; Phosphorylation (STY); Pyrrolidone from Proline; 4 more	57859	FPM_M_01328 Mantle of freshwater pearl mussel cDNA library Hyriopsis cumingii cDNA 5' mRNA sequence
52	163	262329236	102.83	94	94	0	9	2	10	Dimethylation(KR); Methylation(KR); Carbamylation; Phosphorylation (STY); Dihydroxy; 2 more	19536	pmaximaP0020N12_239 Adult silver lipped oyster (Pinctada maxima) Pinctada maxima cDNA 5' mRNA sequence
53	97	313386164	102.57	35	35	0	9	5	9	Replacement of proton with ammonium ion; Propionamide (K X@N-term); 3-methyl-2-pyridyl isocyanate; S-Ethylcystine from Serine; S-guanylation-2	48245	CCTS24937.g1 CCTS Crassostrea gigas mixed adult tissues library 4 normalized Crassostrea gigas cDNA clone CCTS24937 3' mRNA sequence
53	96	313386163	102.57	35	35	0	9	5	9	Replacement of proton with ammonium ion; Propionamide (K X@N-term); 3-methyl-2-pyridyl isocyanate; S-Ethylcystine from Serine; S-guanylation-2	49792	CCTS24937.b1 CCTS Crassostrea gigas mixed adult tissues library 4 normalized Crassostrea gigas cDNA clone CCTS24937 5' mRNA sequence
53	99	313355407	102.57	31	31	0	9	5	9	Replacement of proton with ammonium ion; Propionamide (K X@N-term); 3-methyl-2-pyridyl isocyanate; S-Ethylcystine from Serine; S-guanylation-2	53450	CCTS13367.g1 CCTS Crassostrea gigas mixed adult tissues library 4 normalized Crassostrea gigas cDNA clone CCTS13367 3' mRNA sequence
53	98	313355406	102.57	32	32	0	9	5	9	Replacement of proton with ammonium ion; Propionamide (K X@N-term); 3-methyl-2-pyridyl isocyanate; S-Ethylcystine from Serine; S-guanylation-2	54226	CCTS13367.b1 CCTS Crassostrea gigas mixed adult tissues library 4 normalized Crassostrea gigas cDNA clone CCTS13367 5' mRNA sequence
56	92	58308563	96.12	33	33	0	5	2	7	Phosphorylation (STY); Replacement of proton with ammonium ion; Amidation; Ethylation; Acetylation (TSCYH)	44380	AJ626093 Mytilus galloprovincialis haemolymph gills digestive gland foot adductor muscles and mantle Mytilus galloprovincialis cDNA clone GPPD05403 mRNA sequence
45	113	312836546	93.44	29	29	0	8	6	14	Replacement of proton with ammonium ion; Propionamide (K X@N-term); Methylation(others); Dehydration; Methylation(C-term)	59014	FPM_M_04493 Mantle of freshwater pearl mussel cDNA library Hyriopsis cumingii cDNA 5' mRNA sequence
38	166	312831876	90.19	28	28	0	8	8	17	Deamidation (NQ); Sodium adduct; Dihydroxy; Carboxymethyl (KW X@N-term); Sulfation; Ethyl amino	47363	FPM_M_00719 Mantle of freshwater pearl mussel cDNA library Hyriopsis cumingii cDNA 5' mRNA sequence
58	307	215287583	88.59	7	7	0	6	5	7	Carbamidomethylation; Deamidation (NQ); Michael addition with methylamine; Dehydration; Deoxy	57843	ABLSL6-F10-T7.ab1 Haliotis discus hannai cold-shock subtracted cDNA library Haliotis discus hannai cDNA mRNA sequence
54	164	312832269	87.92	33	33	0	7	7	9	Carbamidomethylation; Oxidation (M); Deamidation (NQ); 2 3-dihydro-2 2-dimethyl-7-benzofuranol N-methyl carbamate; Ethylation; Biotinylation	52908	FPM_M_01535 Mantle of freshwater pearl mussel cDNA library Hyriopsis cumingii cDNA 5' mRNA sequence
68	167	312832411	78.83	13	13	0	4	4	4	Methylation(C-term); Proline oxidation to pyrrolidinone	40620	FPM_M_01783 Mantle of freshwater pearl mussel cDNA library Hyriopsis cumingii cDNA 5' mRNA sequence
66	191	262327552	77.95	40	40	0	5	3	5	Dimethylation(KR); Dihydroxy; Amidation; Ethylation; Acetylation (N-term)	28592	pmaximaP0023F09_360 Adult silver lipped oyster (Pinctada maxima) Pinctada maxima cDNA 5' mRNA sequence
61	235	149775233	76.83	18	18	0	6	6	6	Replacement of proton with ammonium ion; Methylation(others)	49676	DEV-OYS-2S5_E12 Crassostrea gigas early developmental stages D-hinged larvae and spat subtracted libraries Crassostrea gigas cDNA mRNA sequence
60	118	312833548	72.26	16	16	0	4	4	4	Acetylation (N-term)	52370	FPM_M_02711 Mantle of freshwater pearl mussel cDNA library Hyriopsis cumingii cDNA 5' mRNA sequence
60	119	312833294	72.26	14	14	0	4	4	4	Acetylation (N-term)	58843	FPM_M_02192 Mantle of freshwater pearl mussel cDNA library Hyriopsis cumingii cDNA 5' mRNA sequence
60	121	312835921	72.26	16	16	0	4	4	4	Acetylation (N-term)	53485	FPM_M_04021 Mantle of freshwater pearl mussel cDNA library Hyriopsis cumingii cDNA 5' mRNA sequence
60	122	312832665	72.26	15	15	0	4	4	4	Acetylation (N-term)	54935	FPM_M_04844 Mantle of freshwater pearl mussel cDNA library Hyriopsis cumingii cDNA 5' mRNA sequence
60	123	312832076	72.26	14	14	0	4	4	4	Acetylation (N-term)	59307	FPM_M_01133 Mantle of freshwater pearl mussel cDNA library Hyriopsis cumingii cDNA 5' mRNA sequence
60	124	312834242	72.26	14	14	0	4	4	4	Acetylation (N-term)	60189	FPM_M_00873 Mantle of freshwater pearl mussel cDNA library Hyriopsis cumingii cDNA 5' mRNA sequence
70	221	262322379	63.82	16	16	0	3	2	3	Octanoyl; Replacement of proton by lithium	43286	pmaximaP0025D22_547 Adult silver lipped oyster (Pinctada maxima) Pinctada maxima cDNA 5' mRNA sequence
64	111	312834557	63.62	12	12	0	3	3	4	Deamidation (NQ)	53699	FPM_M_01402 Mantle of freshwater pearl mussel cDNA library Hyriopsis cumingii cDNA 5' mRNA sequence
64	161	312834842	63.62	11	11	0	3	3	4	Deamidation (NQ)	54377	FPM_M_01706 Mantle of freshwater pearl mussel cDNA library Hyriopsis cumingii cDNA 5' mRNA sequence
77	172	312832044	57.29	9	9	0	2	2	2	Deamidation (NQ)	46813	FPM_M_01101 Mantle of freshwater pearl mussel cDNA library Hyriopsis cumingii cDNA 5' mRNA sequence
62	298	393389672	48.46	4	4	0	2	2	4	Carbamidomethylation; Deamidation (NQ)	98649	VPEST_E223 Subtractive cDNA library from Venerupis philippinarum exposed to Hexabromocyclododecane Ruditapes philippinarum cDNA clone VPEST_E223 5' similar to chymotrypsin-like protein mRNA sequence
48	132	312836017	47.59	16	16	0	2	2	4	Carbamidomethylation	28945	FPM_M_03906 Mantle of freshwater pearl mussel cDNA library Hyriopsis cumingii cDNA 5' mRNA sequence
78	318	312835068	45.12	7	7	0	2	2	3		37100	FPM_M_01935 Mantle of freshwater pearl mussel cDNA library Hyriopsis cumingii cDNA 5' mRNA sequence
78	319	312835235	45.12	6	6	0	2	2	3		42104	FPM_M_04651 Mantle of freshwater pearl mussel cDNA library Hyriopsis cumingii cDNA 5' mRNA sequence
78	320	312836514	45.12	6	6	0	2	2	3		42821	FPM_M_04407 Mantle of freshwater pearl mussel cDNA library Hyriopsis cumingii cDNA 5' mRNA sequence
78	321	312833208	45.12	5	5	0	2	2	3		45668	FPM_M_02054 Mantle of freshwater pearl mussel cDNA library Hyriopsis cumingii cDNA 5' mRNA sequence
78	322	312836489	45.12	5	5	0	2	2	3		46005	FPM_M_04594 Mantle of freshwater pearl mussel cDNA library Hyriopsis cumingii cDNA 5' mRNA sequence
78	323	312831936	45.12	5	5	0	2	2	3		46481	FPM_M_00836 Mantle of freshwater pearl mussel cDNA library Hyriopsis cumingii cDNA 5' mRNA sequence
78	324	312834584	45.12	5	5	0	2	2	3		46648	FPM_M_03707 Mantle of freshwater pearl mussel cDNA library Hyriopsis cumingii cDNA 5' mRNA sequence
78	325	312836656	45.12	5	5	0	2	2	3		47019	FPM_M_04866 Mantle of freshwater pearl mussel cDNA library Hyriopsis cumingii cDNA 5' mRNA sequence
78	326	312832967	45.12	5	5	0	2	2	3		47279	FPM_M_03079 Mantle of freshwater pearl mussel cDNA library Hyriopsis cumingii cDNA 5' mRNA sequence
78	327	312836368	45.12	5	5	0	2	2	3		47744	FPM_M_04473 Mantle of freshwater pearl mussel cDNA library Hyriopsis cumingii cDNA 5' mRNA sequence
78	328	312835211	45.12	5	5	0	2	2	3		48194	FPM_M_03830 Mantle of freshwater pearl mussel cDNA library Hyriopsis cumingii cDNA 5' mRNA sequence
78	329	312835941	45.12	5	5	0	2	2	3		48283	FPM_M_04041 Mantle of freshwater pearl mussel cDNA library Hyriopsis cumingii cDNA 5' mRNA sequence
78	330	312834743	45.12	5	5	0	2	2	3		48537	FPM_M_01605 Mantle of freshwater pearl mussel cDNA library Hyriopsis cumingii cDNA 5' mRNA sequence
78	331	312836480	45.12	5	5	0	2	2	3		48950	FPM_M_04585 Mantle of freshwater pearl mussel cDNA library Hyriopsis cumingii cDNA 5' mRNA sequence
78	332	312835018	45.12	5	5	0	2	2	3		50560	FPM_M_00351 Mantle of freshwater pearl mussel cDNA library Hyriopsis cumingii cDNA 5' mRNA sequence
78	333	312835676	45.12	5	5	0	2	2	3		50117	FPM_M_00277 Mantle of freshwater pearl mussel cDNA library Hyriopsis cumingii cDNA 5' mRNA sequence
78	334	312835139	45.12	5	5	0	2	2	3		50408	FPM_M_02007 Mantle of freshwater pearl mussel cDNA library Hyriopsis cumingii cDNA 5' mRNA sequence
78	335	312833442	45.12	5	5	0	2	2	3		50554	FPM_M_02501 Mantle of freshwater pearl mussel cDNA library Hyriopsis cumingii cDNA 5' mRNA sequence
78	336	312833661	45.12	5	5	0	2	2	3		52518	FPM_M_02931 Mantle of freshwater pearl mussel cDNA library Hyriopsis cumingii cDNA 5' mRNA sequence
78	337	312836646	45.12	5	5	0	2	2	3		53935	FPM_M_04803 Mantle of freshwater pearl mussel cDNA library Hyriopsis cumingii cDNA 5' mRNA sequence
78	338	312836308	45.12	5	5	0	2	2	3		53796	FPM_M_04199 Mantle of freshwater pearl mussel cDNA library Hyriopsis cumingii cDNA 5' mRNA sequence
78	339	312833308	45.12	5	5	0	2	2	3		54151	FPM_M_02258 Mantle of freshwater pearl mussel cDNA library Hyriopsis cumingii cDNA 5' mRNA sequence
78	340	312835551	45.12	5	5	0	2	2	3		55050	FPM_M_00150 Mantle of freshwater pearl mussel cDNA library Hyriopsis cumingii cDNA 5' mRNA sequence
78	341	312832031	45.12	5	5	0	2	2	3		55355	FPM_M_01035 Mantle of freshwater pearl mussel cDNA library Hyriopsis cumingii cDNA 5' mRNA sequence
78	342	312832329	45.12	5	5	0	2	2	3		55498	FPM_M_01647 Mantle of freshwater pearl mussel cDNA library Hyriopsis cumingii cDNA 5' mRNA sequence
78	343	312833947	45.12	4	4	0	2	2	3		56500	FPM_M_03536 Mantle of freshwater pearl mussel cDNA library Hyriopsis cumingii cDNA 5' mRNA sequence
78	344	312835833	45.12	4	4	0	2	2	3		57718	FPM_M_03932 Mantle of freshwater pearl mussel cDNA library Hyriopsis cumingii cDNA 5' mRNA sequence
78	345	312833207	45.12	4	4	0	2	2	3		57881	FPM_M_02053 Mantle of freshwater pearl mussel cDNA library Hyriopsis cumingii cDNA 5' mRNA sequence
85	313	114204518	44.91	12	12	0	2	2	2	Carbamidomethylation	34562	camnoP096F09 camno Biomphalaria glabrata cDNA clone P096F09 similar to serine 2 (trypsin 2 mRNA sequence
85	314	149407444	44.91	11	11	0	2	2	2	Carbamidomethylation	35825	BGBV-aad83d12.b1 Snail_EST_pSMART Biomphalaria glabrata cDNA similar to ref|NP_004123.1| hyaluronan binding protein 2; hyaluronic acid binding protein 2; hepatocyte growth factor activator-like protein; plasma hyaluronan bindi...
85	315	157942409	44.91	10	10	0	2	2	2	Carbamidomethylation	38550	BGBV-aae62e02.b1 Snail_EST_pSMART Biomphalaria glabrata cDNA similar to sp|P00760|TRY1_BOVIN Trypsinogen cationic precursor (Beta-trypsin) pdb|1F0T|A Chain A Bovine Trypsin Complexed With Rpr131247 pdb|1F0U|A Chain A Bovine...
85	316	163957824	44.91	10	10	0	2	2	2	Carbamidomethylation	40380	CAMHEP100B09 CAMHE Biomphalaria glabrata cDNA clone PP100B09 similar to Transmembrane protease serine 9 (Polyserase-1) (Polyserase-I) mRNA sequence
85	317	157944922	44.91	8	8	0	2	2	2	Carbamidomethylation	48480	BGBV-aae93d04.b1 Snail_EST_pSMART Biomphalaria glabrata cDNA similar to ref|XP_282619.1| RIKEN cDNA 2210010C04 [Mus musculus] ref|XP_289788.1| similar to RIKEN cDNA 2210010C04 [Mus musculus] gb|AAB69044.1| trypsinogen 7 [Mus m...
71	254	121326581	41.49	10	10	0	2	2	3	Carbamidomethylation	45699	PEG002-C-002280-301 Normalized Pedal-Pleural Ganglia Aplysia californica cDNA clone PEG002-C-002280 3' mRNA sequence

## Sheet: U. pictorum AIM_ESTs
Protein Group	Protein ID	Accession	-10lgP	Coverage (%)	Coverage (%) Unio AIM	Intensity Unio AIM	#Peptides	#Unique	#Spec Unio AIM	PTM	Avg. Mass	Description
4	18	312833977	196.93	41	41	0	21	19	47	Carbamidomethylation; Sodium adduct; Methylation(others); Phosphorylation (STY); Carbamylation; 5 more	47503	FPM_M_03566 Mantle of freshwater pearl mussel cDNA library Hyriopsis cumingii cDNA 5' mRNA sequence
5	25	312832047	183.1	70	70	0	27	18	33	Carbamidomethylation; Carbamylation; Ethyl amino; Methylation(KR); Dihydroxy; 13 more	45618	FPM_M_01104 Mantle of freshwater pearl mussel cDNA library Hyriopsis cumingii cDNA 5' mRNA sequence
8	15	312833634	170.98	64	64	0	19	14	22	Phosphorylation (STY); Methylation(KR); Amidation; Formylation; Acetylation (N-term); 3 more	55909	FPM_M_02904 Mantle of freshwater pearl mussel cDNA library Hyriopsis cumingii cDNA 5' mRNA sequence
6	100	215481508	162.07	26	26	0	18	18	20	Carbamylation; Dehydration; Acetylation (N-term); Ubiquitin; Trifluoroleucine; 4 more	80012	FP090991 Crassostrea gigas gonad subtracted library resistant line (oyio10) Crassostrea gigas cDNA clone oyio10b01d21 mRNA sequence
14	13	312834881	155.34	34	34	0	15	10	16	Replacement of proton with ammonium ion; Sulfonation of N-terminus	54483	FPM_M_00211 Mantle of freshwater pearl mussel cDNA library Hyriopsis cumingii cDNA 5' mRNA sequence
13	22	312832416	150.68	21	21	0	8	5	15	Carbamidomethylation; Amidation; Replacement of proton with ammonium ion	42816	FPM_M_01840 Mantle of freshwater pearl mussel cDNA library Hyriopsis cumingii cDNA 5' mRNA sequence
18	48	312834873	149.78	45	45	0	12	3	15	Phosphorylation (STY); Carbamylation; Dihydroxy; Amidation; Ubiquitin; 4 more	43981	FPM_M_00203 Mantle of freshwater pearl mussel cDNA library Hyriopsis cumingii cDNA 5' mRNA sequence
17	80	262327333	148.69	26	26	0	9	8	11	Carbamylation; Methylation(KR); 2 3-dihydro-2 2-dimethyl-7-benzofuranol N-methyl carbamate; Propionamide (K X@N-term); Octanoyl; Ethylation	40936	pmaximaP0007G07_509 Adult silver lipped oyster (Pinctada maxima) Pinctada maxima cDNA 5' mRNA sequence
21	111	215291018	148.31	17	17	0	7	7	9	Carbamidomethylation; Deamidation (NQ); Carbamylation; Benzoyl	49416	ABLSL5-E9-T7.ab1 Haliotis discus hannai cold-shock subtracted cDNA library Haliotis discus hannai cDNA mRNA sequence
25	50	262327097	137.95	30	30	0	7	2	10	Ammonia-loss (N); Methylation(others); Methylation(KR); Decanoyl; Ethylation; Glyoxal-derived hydroimiadazolone	47554	pmaximaP0006H24_603 Adult silver lipped oyster (Pinctada maxima) Pinctada maxima cDNA 5' mRNA sequence
12	27	312832012	134.52	24	24	0	7	7	13	Carbamidomethylation; Oxidation (HW); Deamidation (NQ); Methylation(others); Carbamylation; 3 more	52893	FPM_M_01016 Mantle of freshwater pearl mussel cDNA library Hyriopsis cumingii cDNA 5' mRNA sequence
28	131	262320398	132.27	61	61	0	9	6	11	Deamidation (NQ); Phosphorylation (STY); Dihydroxy; Acetylation (N-term); Replacement of proton with ammonium ion; 2 more	36464	pmaximaP0014J14_454 Adult silver lipped oyster (Pinctada maxima) Pinctada maxima cDNA 5' mRNA sequence
16	117	215287583	128.93	12	12	0	4	4	5	Carbamidomethylation; Dehydration; Sulfation; Deoxy; O-Diisopropylphosphorylation	57843	ABLSL6-F10-T7.ab1 Haliotis discus hannai cold-shock subtracted cDNA library Haliotis discus hannai cDNA mRNA sequence
29	53	262321105	127.4	48	48	0	7	2	10	Ammonia-loss (N); Methylation(others); Methylation(KR); Ethylation; Glyoxal-derived hydroimiadazolone; Levuglandinyl - lysine lactam adduct	35923	pmaximaP0001I05_459 Adult silver lipped oyster (Pinctada maxima) Pinctada maxima cDNA 5' mRNA sequence
11	47	312836017	120.78	43	43	0	5	5	6	Carbamidomethylation; Oxidation (M); Deamidation (NQ); Phosphorylation (STY); Dihydroxy; 3 more	28945	FPM_M_03906 Mantle of freshwater pearl mussel cDNA library Hyriopsis cumingii cDNA 5' mRNA sequence
32	121	312833630	119.54	12	12	0	3	3	5	Replacement of proton with ammonium ion; Monoglutamyl	58700	FPM_M_02900 Mantle of freshwater pearl mussel cDNA library Hyriopsis cumingii cDNA 5' mRNA sequence
42	171	313359112	105.77	18	18	0	5	2	6	Deamidation (NQ); Carbamylation; Methylation(KR); Acetylation (N-term); Deamidation followed by a methylation; Dimethylation(KR)	63337	CCTS12847.b1 CCTS Crassostrea gigas mixed adult tissues library 4 normalized Crassostrea gigas cDNA clone CCTS12847 5' mRNA sequence
24	202	312836546	104.89	20	20	0	4	2	14	Methylation(others); Ubiquitin; Carboxyl modification with ethanolamine	59014	FPM_M_04493 Mantle of freshwater pearl mussel cDNA library Hyriopsis cumingii cDNA 5' mRNA sequence
37	83	262319165	100.56	19	19	0	3	2	4	Hexose (NSY); Methylation(KR)	37413	pmaximaP0006D09_471 Adult silver lipped oyster (Pinctada maxima) Pinctada maxima cDNA 5' mRNA sequence
33	55	312835161	98.65	18	18	0	5	5	5	Carbamylation; Dehydration	49090	FPM_M_02029 Mantle of freshwater pearl mussel cDNA library Hyriopsis cumingii cDNA 5' mRNA sequence
43	102	239585945	96.79	13	13	0	3	2	3	Dihydroxy	76189	mcof0906375 mco-foot Mytilus coruscus cDNA clone mcof0906375 mRNA sequence
43	104	237638533	96.79	12	12	0	3	2	3	Dihydroxy	86728	mcof09040414 mco-foot Mytilus coruscus cDNA clone mcof09040414 mRNA sequence
41	81	312836026	96.07	8	8	0	3	3	5	Oxidation (M); Sulphone	60656	FPM_M_04127 Mantle of freshwater pearl mussel cDNA library Hyriopsis cumingii cDNA 5' mRNA sequence
61	52	312836519	92.61	16	16	0	3	3	3	Carbamidomethylation; Deamidation (NQ); Dehydration	37723	FPM_M_04412 Mantle of freshwater pearl mussel cDNA library Hyriopsis cumingii cDNA 5' mRNA sequence
53	198	168810200	92.53	25	25	0	4	4	7	Carbamylation; Amidation; Deoxy; Octanoyl; Amidination of lysines or N-terminal amines with methyl acetimidate	54289	CU684403 Crassostrea gigas mantle-edge subtracted library resistant line (oyge10) Crassostrea gigas cDNA clone oyge10b14o09 rprim mRNA sequence
60	133	163527537	91.07	19	19	0	4	4	4	Sodium adduct; Replacement of proton with ammonium ion; Diglutamyl	47181	CBBN8049.fwd CBBN Lottia gigantea 3 4 5 6.5d Larvae (M) Lottia gigantea cDNA clone CBBN8049 5' mRNA sequence
60	134	163527536	91.07	19	19	0	4	4	4	Sodium adduct; Replacement of proton with ammonium ion; Diglutamyl	50872	CBBN8049.rev CBBN Lottia gigantea 3 4 5 6.5d Larvae (M) Lottia gigantea cDNA clone CBBN8049 3' mRNA sequence
63	90	312832411	86.62	20	20	0	3	3	3	Dihydroxy; Proline oxidation to pyrrolidinone	40620	FPM_M_01783 Mantle of freshwater pearl mussel cDNA library Hyriopsis cumingii cDNA 5' mRNA sequence
55	61	312832251	85.24	15	15	0	3	3	3		53374	FPM_M_01464 Mantle of freshwater pearl mussel cDNA library Hyriopsis cumingii cDNA 5' mRNA sequence
65	253	312834086	79.75	34	34	0	2	2	2	Oxidation (HW); Sodium adduct; 2-amino-3-oxo-butanoic_acid	27799	FPM_M_00552 Mantle of freshwater pearl mussel cDNA library Hyriopsis cumingii cDNA 5' mRNA sequence
54	174	149775233	74.58	10	10	0	2	2	4		49676	DEV-OYS-2S5_E12 Crassostrea gigas early developmental stages D-hinged larvae and spat subtracted libraries Crassostrea gigas cDNA mRNA sequence
79	108	312834649	56.15	10	10	0	2	2	2		51008	FPM_M_01495 Mantle of freshwater pearl mussel cDNA library Hyriopsis cumingii cDNA 5' mRNA sequence
79	118	312831953	56.15	10	10	0	2	2	2		47921	FPM_M_00905 Mantle of freshwater pearl mussel cDNA library Hyriopsis cumingii cDNA 5' mRNA sequence
79	119	312836598	56.15	10	10	0	2	2	2		48383	FPM_M_04755 Mantle of freshwater pearl mussel cDNA library Hyriopsis cumingii cDNA 5' mRNA sequence
79	120	312832625	56.15	10	10	0	2	2	2		48717	FPM_M_04752 Mantle of freshwater pearl mussel cDNA library Hyriopsis cumingii cDNA 5' mRNA sequence

## Sheet: U. crassus ASM_ESTs
Protein Group	Protein ID	Accession	-10lgP	Coverage (%)	Coverage (%) Unio Crassus ASM	Intensity Unio Crassus ASM	#Peptides	#Unique	#Spec Unio Crassus ASM	PTM	Avg. Mass	Description
1	2	312835028	259.71	44	44	21600000	81	5	489	Carbamidomethylation; Pyro-glu from Q; Oxidation (HW); Deamidation (NQ); Dihydroxy; 27 more	58871	FPM_M_01895 Mantle of freshwater pearl mussel cDNA library Hyriopsis cumingii cDNA 5' mRNA sequence
4	7	312834711	257.68	34	34	73200000	74	2	479	Carbamidomethylation; Pyro-glu from Q; Oxidation (HW); Deamidation (NQ); Dihydroxy; 22 more	41148	FPM_M_00038 Mantle of freshwater pearl mussel cDNA library Hyriopsis cumingii cDNA 5' mRNA sequence
3	8	312835577	256.91	30	30	4620000	74	2	479	Carbamidomethylation; Pyro-glu from Q; Oxidation (HW); Deamidation (NQ); Dihydroxy; 23 more	48345	FPM_M_00176 Mantle of freshwater pearl mussel cDNA library Hyriopsis cumingii cDNA 5' mRNA sequence
5	17	312833634	232.09	61	61	2790000000	71	71	228	Oxidation (HW); Deamidation (NQ); 3-methyl-2-pyridyl isocyanate; Hypusine; Methylation(KR); 27 more	55909	FPM_M_02904 Mantle of freshwater pearl mussel cDNA library Hyriopsis cumingii cDNA 5' mRNA sequence
6	18	312833428	198.4	15	15	115000000	27	2	182	Carbamidomethylation; Oxidation (HW); Deamidation (NQ); Dihydroxy; Methylation(KR); 6 more	43032	FPM_M_02486 Mantle of freshwater pearl mussel cDNA library Hyriopsis cumingii cDNA 5' mRNA sequence
16	35	312833977	159.26	53	53	140000000	12	12	15	Carbamidomethylation; Dihydroxy; Methylation(KR); Dehydration; Amidation; 5 more	47503	FPM_M_03566 Mantle of freshwater pearl mussel cDNA library Hyriopsis cumingii cDNA 5' mRNA sequence
19	46	312836519	126.59	35	35	43200000	8	8	9	Carbamidomethylation; Deamidation (NQ); Methylation(KR); Beta-methylthiolation; Phenethyl isothiocyanate; 2 more	37723	FPM_M_04412 Mantle of freshwater pearl mussel cDNA library Hyriopsis cumingii cDNA 5' mRNA sequence
15	14	312833149	107.17	33	33	165000000	7	7	12	Carbamidomethylation; Oxidation (M); Deamidation (NQ); Dihydroxy; Dehydration; Replacement of proton with ammonium ion	51507	FPM_M_03426 Mantle of freshwater pearl mussel cDNA library Hyriopsis cumingii cDNA 5' mRNA sequence
15	13	312835179	107.17	32	32	165000000	7	7	12	Carbamidomethylation; Oxidation (M); Deamidation (NQ); Dihydroxy; Dehydration; Replacement of proton with ammonium ion	52271	FPM_M_02047 Mantle of freshwater pearl mussel cDNA library Hyriopsis cumingii cDNA 5' mRNA sequence
15	15	312835002	107.17	29	29	165000000	7	7	12	Carbamidomethylation; Oxidation (M); Deamidation (NQ); Dihydroxy; Dehydration; Replacement of proton with ammonium ion	58090	FPM_M_00335 Mantle of freshwater pearl mussel cDNA library Hyriopsis cumingii cDNA 5' mRNA sequence
15	16	312834262	107.17	28	28	165000000	7	7	12	Carbamidomethylation; Oxidation (M); Deamidation (NQ); Dihydroxy; Dehydration; Replacement of proton with ammonium ion	60871	FPM_M_00946 Mantle of freshwater pearl mussel cDNA library Hyriopsis cumingii cDNA 5' mRNA sequence
18	19	312832416	97.26	28	28	4580000	7	3	10	Carbamidomethylation; Deamidation (NQ); Dihydroxy; Replacement of proton by lithium	42816	FPM_M_01840 Mantle of freshwater pearl mussel cDNA library Hyriopsis cumingii cDNA 5' mRNA sequence
27	28	312836017	81.86	32	32	25900000	6	6	7	Carbamidomethylation; Glycidamide adduct; Methylglyoxal-derived hydroimidazolone	28945	FPM_M_03906 Mantle of freshwater pearl mussel cDNA library Hyriopsis cumingii cDNA 5' mRNA sequence
29	31	312836478	70.78	11	11	22100000	3	3	5	Oxidation (M); Deamidation (NQ)	49737	FPM_M_04583 Mantle of freshwater pearl mussel cDNA library Hyriopsis cumingii cDNA 5' mRNA sequence
29	32	312835249	70.78	10	10	22100000	3	3	5	Oxidation (M); Deamidation (NQ)	54787	FPM_M_04665 Mantle of freshwater pearl mussel cDNA library Hyriopsis cumingii cDNA 5' mRNA sequence
34	20	312831970	59.2	6	6	6140000	2	2	3	Carbamidomethylation; Deamidation (NQ)	51142	FPM_M_00922 Mantle of freshwater pearl mussel cDNA library Hyriopsis cumingii cDNA 5' mRNA sequence
17	29	121459237	47.92	8	8	146000000	2	2	15		50186	CNSN01-F-143546-501 Normalized CNS library (juvenile 1) Aplysia californica cDNA clone CNSN01-F-143546 5' mRNA sequence
17	30	121459213	47.92	9	9	146000000	2	2	15		44944	CNSN01-F-143512-501 Normalized CNS library (juvenile 1) Aplysia californica cDNA clone CNSN01-F-143512 5' mRNA sequence

## Sheet: U. crassus AIM_ESTs
Protein Group	Protein ID	Accession	-10lgP	Coverage (%)	Coverage (%) Unio Crassus AIM	Intensity Unio Crassus AIM	#Peptides	#Unique	#Spec Unio Crassus AIM	PTM	Avg. Mass	Description
7	34159	312833634	229.24	71	71	4990000000	80	58	170	Deamidation (NQ); Amidation; Methylation(C-term); 3-methyl-2-pyridyl isocyanate; Deoxy; 19 more	55909	FPM_M_02904 Mantle of freshwater pearl mussel cDNA library Hyriopsis cumingii cDNA 5' mRNA sequence
14	34188	312836546	223.86	74	74	674000000	45	32	91	Carbamidomethylation; Amidation; Methylation(C-term); Oxidation or Hydroxylation; Phenethyl isothiocyanate; 13 more	59014	FPM_M_04493 Mantle of freshwater pearl mussel cDNA library Hyriopsis cumingii cDNA 5' mRNA sequence
1	34160	312836213	206.09	41	41	70500000	25	4	412	Carbamidomethylation; Pyro-glu from Q; Oxidation (HW); Deamidation (NQ); Acetylation (N-term); 17 more	45449	FPM_M_04103 Mantle of freshwater pearl mussel cDNA library Hyriopsis cumingii cDNA 5' mRNA sequence
21	34187	312833977	205.82	55	55	1260000000	23	11	40	Carbamidomethylation; Oxidation (HW); Deamidation (NQ); Amidation; Ethylation; 7 more	47503	FPM_M_03566 Mantle of freshwater pearl mussel cDNA library Hyriopsis cumingii cDNA 5' mRNA sequence
4	34168	312835577	204.83	28	28	887000	21	2	404	Carbamidomethylation; Pyro-glu from Q; Oxidation (HW); Deamidation (NQ); Ubiquitin; 17 more	48345	FPM_M_00176 Mantle of freshwater pearl mussel cDNA library Hyriopsis cumingii cDNA 5' mRNA sequence
18	34243	325152144	184.38	41	41	125000000	35	35	64	Ubiquitin; Acetylation (N-term); Amidation; Oxidation or Hydroxylation; Nucleophilic addtion to cytopiloyne; 11 more	31438	FS941053 Pinctada fucata mantle adult Pinctada fucata cDNA clone 4789D1R mRNA sequence
17	34251	194258150	174.62	97	97	201000000	27	27	67	Amidation; Phenethyl isothiocyanate; Nucleophilic addtion to cytopiloyne; N-acetyl neuraminic acid; Carbamylation; 2 more	8998	pl_027-C10 Ilyanassa (snail) 0-48h Ilyanassa obsoleta cDNA 5' mRNA sequence
13	34185	312834881	167.06	54	54	594000000	40	19	100	Phosphorylation (STY); Ubiquitin; Amidation; Methylation(C-term); Deoxy; 8 more	54483	FPM_M_00211 Mantle of freshwater pearl mussel cDNA library Hyriopsis cumingii cDNA 5' mRNA sequence
15	34364	262325020	148.21	28	28	42300000	18	2	76	Acetylation (N-term); Amidation; Methylation(C-term); Hexose (NSY)	48563	pmaximaP0013E10_613 Adult silver lipped oyster (Pinctada maxima) Pinctada maxima cDNA 5' mRNA sequence
19	34174	312836368	146.8	53	53	207000000	16	3	62	Oxidation (M); Deamidation (NQ); Iminobiotinylation; Michael addition with methylamine; Octanoyl; 2 more	47744	FPM_M_04473 Mantle of freshwater pearl mussel cDNA library Hyriopsis cumingii cDNA 5' mRNA sequence
37	34449	212816519	117.92	20	20	42800000	9	5	12	Amidation; Hexose (NSY); Replacement of proton with ammonium ion	56621	MUS22-B17.y1d-s SHGC-MUS Mytilus californianus cDNA 3' mRNA sequence
37	34454	212818923	117.92	20	20	42800000	9	5	12	Amidation; Hexose (NSY); Replacement of proton with ammonium ion	56588	MUS23-B14.y1d-s SHGC-MUS Mytilus californianus cDNA 3' mRNA sequence
37	34446	212812588	117.92	19	19	42800000	9	5	12	Amidation; Hexose (NSY); Replacement of proton with ammonium ion	53078	MUS23-B14.x1d-t SHGC-MUS Mytilus californianus cDNA 5' mRNA sequence
37	34445	212818163	117.92	20	20	42800000	9	5	12	Amidation; Hexose (NSY); Replacement of proton with ammonium ion	53284	MUS22-B17.x1d-t SHGC-MUS Mytilus californianus cDNA 5' mRNA sequence
37	34447	212817495	117.92	17	17	42800000	9	5	12	Amidation; Hexose (NSY); Replacement of proton with ammonium ion	59844	MUS16-H21.x1d-t SHGC-MUS Mytilus californianus cDNA 5' mRNA sequence
22	34238	313386164	114.16	40	40	206000000	9	9	11	Ubiquitin; Amidation; Oxidation or Hydroxylation; Methylation(KR); Sulfation; Pyridylacetyl	48245	CCTS24937.g1 CCTS Crassostrea gigas mixed adult tissues library 4 normalized Crassostrea gigas cDNA clone CCTS24937 3' mRNA sequence
22	34236	313386163	114.16	40	40	206000000	9	9	11	Ubiquitin; Amidation; Oxidation or Hydroxylation; Methylation(KR); Sulfation; Pyridylacetyl	49792	CCTS24937.b1 CCTS Crassostrea gigas mixed adult tissues library 4 normalized Crassostrea gigas cDNA clone CCTS24937 5' mRNA sequence
22	34239	313355407	114.16	36	36	206000000	9	9	11	Ubiquitin; Amidation; Oxidation or Hydroxylation; Methylation(KR); Sulfation; Pyridylacetyl	53450	CCTS13367.g1 CCTS Crassostrea gigas mixed adult tissues library 4 normalized Crassostrea gigas cDNA clone CCTS13367 3' mRNA sequence
22	34237	313355406	114.16	37	37	206000000	9	9	11	Ubiquitin; Amidation; Oxidation or Hydroxylation; Methylation(KR); Sulfation; Pyridylacetyl	54226	CCTS13367.b1 CCTS Crassostrea gigas mixed adult tissues library 4 normalized Crassostrea gigas cDNA clone CCTS13367 5' mRNA sequence
36	34240	312836493	105.87	14	14	227000000	4	4	14	Oxidation (M); Deamidation (NQ); Phosphorylation (STY); Dihydroxy	49623	FPM_M_04386 Mantle of freshwater pearl mussel cDNA library Hyriopsis cumingii cDNA 5' mRNA sequence
36	34241	312835451	100.39	14	14	227000000	4	4	14	Oxidation (M); Deamidation (NQ); Phosphorylation (STY); Dihydroxy	47210	FPM_M_00050 Mantle of freshwater pearl mussel cDNA library Hyriopsis cumingii cDNA 5' mRNA sequence
23	34386	262323052	104.71	41	41	15000000	13	2	25	Oxidation (M); Phosphorylation (STY); Acetylation (N-term); Amidation; Oxidation or Hydroxylation; 4 more	48483	pmaximaP0028I14_632 Adult silver lipped oyster (Pinctada maxima) Pinctada maxima cDNA 5' mRNA sequence
24	34344	203683599	104.16	21	21	139000000	10	4	17	Carbamidomethylation; Oxidation (HW); Methylation(KR); Propionamide (K X@N-term); Hexose (NSY); 2 more	65841	G1045P355FP22.T1 Aplysia californica Pooled Normalized Library Aplysia californica cDNA mRNA sequence
27	34234	312836115	104.13	26	26	805000000	6	6	25	Carbamidomethylation; Deamidation (NQ); Dihydroxy; Acetylation (K); Carboxymethyl (KW X@N-term); Replacement of proton by lithium	43666	FPM_M_04004 Mantle of freshwater pearl mussel cDNA library Hyriopsis cumingii cDNA 5' mRNA sequence
27	34235	312832416	104.13	26	26	805000000	6	6	25	Carbamidomethylation; Deamidation (NQ); Dihydroxy; Acetylation (K); Carboxymethyl (KW X@N-term); Replacement of proton by lithium	42816	FPM_M_01840 Mantle of freshwater pearl mussel cDNA library Hyriopsis cumingii cDNA 5' mRNA sequence
31	34295	312835629	98.03	26	26	53300000	4	4	5	Carbamidomethylation; Oxidation (M); Amidation; Carbamylation; Propionamide (K X@N-term)	46948	FPM_M_02557 Mantle of freshwater pearl mussel cDNA library Hyriopsis cumingii cDNA 5' mRNA sequence
25	34377	203678605	90.48	19	19	191000000	8	2	15	Carbamidomethylation; Oxidation (HW); Phosphorylation to amine thiol; Methylation(KR); Hexose (NSY); 2 more	63353	G1045P361FE3.T1 Aplysia californica Pooled Normalized Library Aplysia californica cDNA mRNA sequence
32	34204	218922094	85.65	18	18	275000000	6	6	18	Carbamidomethylation; Sodium adduct; Guanidination	50269	RM_G_00998 hemocytes of freshwater pearl mussel cDNA Library Hyriopsis cumingii cDNA 5' mRNA sequence
32	34205	218921948	85.65	18	18	275000000	6	6	18	Carbamidomethylation; Sodium adduct; Guanidination	50988	RM_G_00123 hemocytes of freshwater pearl mussel cDNA Library Hyriopsis cumingii cDNA 5' mRNA sequence
29	34297	203610911	84.25	15	15	5400000	7	2	11	Oxidation (HW); Acetylation (N-term); Hexose (NSY); Replacement of proton with ammonium ion; Sodium adduct	60261	G1045P347FE13.T1 Aplysia californica Pooled Normalized Library Aplysia californica cDNA mRNA sequence
43	34228	312832836	81.9	18	18	67700000	4	4	5	Carbamidomethylation; Oxidation (M); Hexose (NSY)	46610	FPM_M_02788 Mantle of freshwater pearl mussel cDNA library Hyriopsis cumingii cDNA 5' mRNA sequence
43	34229	312833860	81.9	16	16	67700000	4	4	5	Carbamidomethylation; Oxidation (M); Hexose (NSY)	52927	FPM_M_03344 Mantle of freshwater pearl mussel cDNA library Hyriopsis cumingii cDNA 5' mRNA sequence
43	34232	312832154	81.9	15	15	67700000	4	4	5	Carbamidomethylation; Oxidation (M); Hexose (NSY)	58247	FPM_M_01315 Mantle of freshwater pearl mussel cDNA library Hyriopsis cumingii cDNA 5' mRNA sequence
26	34411	168810200	79.42	18	18	319000000	6	6	20	Deamidation (NQ); Dihydroxy; Carbamylation; Carboxylation (DKW)	54289	CU684403 Crassostrea gigas mantle-edge subtracted library resistant line (oyge10) Crassostrea gigas cDNA clone oyge10b14o09 rprim mRNA sequence
40	34406	312836519	78.29	15	15	83500000	4	3	7	Carbamidomethylation; Carboxylation (DKW); Oxidized Arginine biotinylated with biotin hydrazide	37723	FPM_M_04412 Mantle of freshwater pearl mussel cDNA library Hyriopsis cumingii cDNA 5' mRNA sequence
12	34340	342661626	76.67	10	10	497000000	3	3	52	Oxidation or Hydroxylation; Deoxy; Ammonia-loss (N)	64563	oy86c02.y1 Woods Hole Squid Stellate Ganglia cDNA Library Doryteuthis pealeii cDNA mRNA sequence
52	34301	312832251	70.49	15	15	128000000	4	4	4	Deamidation (NQ); Dehydration	53374	FPM_M_01464 Mantle of freshwater pearl mussel cDNA library Hyriopsis cumingii cDNA 5' mRNA sequence
60	34281	312836742	66.02	13	13	41600000	2	2	2	Ethylation	50744	FPM_M_05005 Mantle of freshwater pearl mussel cDNA library Hyriopsis cumingii cDNA 5' mRNA sequence
60	34282	312835620	66.02	13	13	41600000	2	2	2	Ethylation	51902	FPM_M_02548 Mantle of freshwater pearl mussel cDNA library Hyriopsis cumingii cDNA 5' mRNA sequence
60	34283	312833902	66.02	12	12	41600000	2	2	2	Ethylation	56086	FPM_M_03439 Mantle of freshwater pearl mussel cDNA library Hyriopsis cumingii cDNA 5' mRNA sequence
28	34253	312831970	63.27	11	11	7940000	3	3	24	Carbamidomethylation; Deamidation (NQ)	51142	FPM_M_00922 Mantle of freshwater pearl mussel cDNA library Hyriopsis cumingii cDNA 5' mRNA sequence
33	34254	47561817	57.01	8	8	142000000	2	2	7	Oxidation (M); Deamidation (NQ)	66112	ai_I003.15 Bay Scallop planktonic veliger larvae ZAP Express Library Argopecten irradians cDNA 5' similar to 3 alpha procollagen mRNA sequence
56	34370	164567054	52.86	14	14	12300000	2	2	4	Carbamidomethylation; Mutation	43070	AM854032 cDN19 Crassostrea gigas cDNA clone cDN19P0003E21 5' mRNA sequence
73	34275	312833149	52.21	10	10	69900000	2	2	2	Carbamidomethylation; Oxidation (M)	51507	FPM_M_03426 Mantle of freshwater pearl mussel cDNA library Hyriopsis cumingii cDNA 5' mRNA sequence
73	34276	312835179	52.21	10	10	69900000	2	2	2	Carbamidomethylation; Oxidation (M)	52271	FPM_M_02047 Mantle of freshwater pearl mussel cDNA library Hyriopsis cumingii cDNA 5' mRNA sequence
73	34277	312835002	52.21	9	9	69900000	2	2	2	Carbamidomethylation; Oxidation (M)	58090	FPM_M_00335 Mantle of freshwater pearl mussel cDNA library Hyriopsis cumingii cDNA 5' mRNA sequence
73	34278	312834262	52.21	9	9	69900000	2	2	2	Carbamidomethylation; Oxidation (M)	60871	FPM_M_00946 Mantle of freshwater pearl mussel cDNA library Hyriopsis cumingii cDNA 5' mRNA sequence
30	34252	312836017	49.37	16	16	279000000	2	2	13	Carbamidomethylation	28945	FPM_M_03906 Mantle of freshwater pearl mussel cDNA library Hyriopsis cumingii cDNA 5' mRNA sequence
62	35394	313327375	48.61	10	10	17700000	2	2	3	Mutation	59052	CCTP15197.b1 CCTP Crassostrea gigas mixed adult tissues library 3 normalized Crassostrea gigas cDNA clone CCTP15197 5' mRNA sequence
70	34255	312835846	48.58	10	10	666000000	2	2	3	Carbamidomethylation; Pyro-glu from Q	47079	FPM_M_03945 Mantle of freshwater pearl mussel cDNA library Hyriopsis cumingii cDNA 5' mRNA sequence
53	34307	262327333	47.55	8	8	114000000	2	2	5		40936	pmaximaP0007G07_509 Adult silver lipped oyster (Pinctada maxima) Pinctada maxima cDNA 5' mRNA sequence
96	38755	238639212	47.3	7	7	1450000	2	2	2	Mutation	114478	EST6233 cDNA library in Pinctada martensi Pinctada martensii cDNA clone CHIP_05_gastropod_04_80.SP6_H10.ab1 mRNA sequence
45	34405	378908377	45.26	4	4	44200000	2	2	6		57971	FO178747 Sepia officinalis whole embryos embryonic stages 16 to 28 Sepia officinalis cDNA clone ADY0AAA33YM19 mRNA sequence

## Sheet: M. margaritifera ASM_ESTs
Protein Group	Protein ID	Accession	-10lgP	Coverage (%)	Coverage (%) Sample 1	Intensity Sample 1	#Peptides	#Unique	#Spec Sample 1	PTM	Avg. Mass	Description
1	1	312834327	193.18	30	30	0	37	33	75	Phosphorylation (STY); Carbamylation; Amidation; Methylation(C-term); 2 3-dihydro-2 2-dimethyl-7-benzofuranol N-methyl carbamate; 10 more	54604	FPM_M_01065 Mantle of freshwater pearl mussel cDNA library Hyriopsis cumingii cDNA 5' mRNA sequence
1	2	312834881	193.18	30	30	0	37	33	75	Phosphorylation (STY); Carbamylation; Amidation; Methylation(C-term); 2 3-dihydro-2 2-dimethyl-7-benzofuranol N-methyl carbamate; 10 more	54483	FPM_M_00211 Mantle of freshwater pearl mussel cDNA library Hyriopsis cumingii cDNA 5' mRNA sequence
2	17	312836546	165.54	32	32	0	31	7	47	Deamidation (NQ); Carbamylation; Amidation; Dehydration; Methylation(KR); 5 more	59014	FPM_M_04493 Mantle of freshwater pearl mussel cDNA library Hyriopsis cumingii cDNA 5' mRNA sequence
3	8	312833977	156.68	30	30	0	28	4	43	Dihydroxy; Carbamylation; Amidation; Replacement of proton with ammonium ion; Acetylation (TSCYH)	47503	FPM_M_03566 Mantle of freshwater pearl mussel cDNA library Hyriopsis cumingii cDNA 5' mRNA sequence
7	18	312836213	144.35	28	28	0	13	12	18	Oxidation (HW); Dihydroxy; Carbamylation; Amidation; Tryptophan oxidation to oxolactone; 4 more	45449	FPM_M_04103 Mantle of freshwater pearl mussel cDNA library Hyriopsis cumingii cDNA 5' mRNA sequence
7	19	312832049	144.35	27	27	0	13	12	18	Oxidation (HW); Dihydroxy; Carbamylation; Amidation; Tryptophan oxidation to oxolactone; 4 more	50360	FPM_M_01106 Mantle of freshwater pearl mussel cDNA library Hyriopsis cumingii cDNA 5' mRNA sequence
7	21	312835028	144.35	23	23	0	13	12	18	Oxidation (HW); Dihydroxy; Carbamylation; Amidation; Tryptophan oxidation to oxolactone; 4 more	58871	FPM_M_01895 Mantle of freshwater pearl mussel cDNA library Hyriopsis cumingii cDNA 5' mRNA sequence
4	3	312833634	137.47	39	39	0	14	10	20	Phosphorylation (STY); Ethylation; 2 3-dihydro-2 2-dimethyl-7-benzofuranol N-methyl carbamate; Methylation(KR); Formylation; O-Diisopropylphosphorylation	55909	FPM_M_02904 Mantle of freshwater pearl mussel cDNA library Hyriopsis cumingii cDNA 5' mRNA sequence
6	64	262326668	136.9	56	56	0	16	13	16	Carbamylation; Amidation; Ethylation; Acetylation (N-term); Methylation(KR); 2 more	51386	pmaximaP0021O11_656 Adult silver lipped oyster (Pinctada maxima) Pinctada maxima cDNA 5' mRNA sequence
9	14	262319994	132.16	65	65	0	14	8	14	Dihydroxy; Amidation; Sodium adduct; Acetylation (N-term); Dimethylation(KR); 7 more	52957	pmaximaP0013J08_670 Adult silver lipped oyster (Pinctada maxima) Pinctada maxima cDNA 5' mRNA sequence
10	16	262327333	118.25	57	57	0	14	12	14	Phosphorylation (STY); Carbamylation; Amidation; Ethylation; Sodium adduct; 3 more	40936	pmaximaP0007G07_509 Adult silver lipped oyster (Pinctada maxima) Pinctada maxima cDNA 5' mRNA sequence
11	10	260748576	116.93	25	25	0	12	10	13	Carbamidomethylation; HexNAcylation (N); Formylation; Pyridylacetyl	69143	CU999371 Pascal Favrel cDNA library hemocyte (wy0aba) Crassostrea gigas cDNA clone wy0aba12k19 mRNA sequence
5	59	58307798	105.06	45	45	0	10	9	15	Dihydroxy; Amidation; Ethylation; Sodium adduct; Diethylation; 2 more	41224	AJ625328 Mytilus galloprovincialis haemolymph gills digestive gland foot adductor muscles and mantle Mytilus galloprovincialis cDNA clone GPPD04251 mRNA sequence
8	47	168810200	92.85	49	49	0	8	8	13	Deamidation (NQ); Carbamylation; Dehydration; Methylation(KR); Carboxyl modification with ethanolamine; Methylation(others)	54289	CU684403 Crassostrea gigas mantle-edge subtracted library resistant line (oyge10) Crassostrea gigas cDNA clone oyge10b14o09 rprim mRNA sequence
14	4	312833149	86.84	17	17	0	3	3	3	Carbamidomethylation; Oxidation (M); Deamidation (NQ)	51507	FPM_M_03426 Mantle of freshwater pearl mussel cDNA library Hyriopsis cumingii cDNA 5' mRNA sequence
14	5	312835002	86.84	15	15	0	3	3	3	Carbamidomethylation; Oxidation (M); Deamidation (NQ)	58090	FPM_M_00335 Mantle of freshwater pearl mussel cDNA library Hyriopsis cumingii cDNA 5' mRNA sequence
14	6	312834262	86.84	15	15	0	3	3	3	Carbamidomethylation; Oxidation (M); Deamidation (NQ)	60871	FPM_M_00946 Mantle of freshwater pearl mussel cDNA library Hyriopsis cumingii cDNA 5' mRNA sequence
14	7	312835179	86.84	17	17	0	3	3	3	Carbamidomethylation; Oxidation (M); Deamidation (NQ)	52271	FPM_M_02047 Mantle of freshwater pearl mussel cDNA library Hyriopsis cumingii cDNA 5' mRNA sequence
13	74	312836493	86.02	13	13	0	4	4	7	Deamidation (NQ); Dihydroxy; Amidation; Tryptophan oxidation to hydroxykynurenin; Quinone	49623	FPM_M_04386 Mantle of freshwater pearl mussel cDNA library Hyriopsis cumingii cDNA 5' mRNA sequence
12	29	312833947	81.15	20	20	0	6	6	10	Deamidation (NQ); Amidation; Aminoethylcysteine	56500	FPM_M_03536 Mantle of freshwater pearl mussel cDNA library Hyriopsis cumingii cDNA 5' mRNA sequence
16	33	312836519	78.86	34	34	0	6	4	7	Carbamidomethylation; Deamidation (NQ); Dehydration; Diethylation	37723	FPM_M_04412 Mantle of freshwater pearl mussel cDNA library Hyriopsis cumingii cDNA 5' mRNA sequence
21	79	312835367	76.02	13	13	0	4	4	5	Carbamidomethylation; Oxidation (M); Deamidation (NQ)	49286	FPM_M_02237 Mantle of freshwater pearl mussel cDNA library Hyriopsis cumingii cDNA 5' mRNA sequence
21	80	312833467	76.02	12	12	0	4	4	5	Carbamidomethylation; Oxidation (M); Deamidation (NQ)	54410	FPM_M_02578 Mantle of freshwater pearl mussel cDNA library Hyriopsis cumingii cDNA 5' mRNA sequence
21	129	312833968	76.02	14	14	0	4	4	5	Carbamidomethylation; Oxidation (M); Deamidation (NQ)	45250	FPM_M_03557 Mantle of freshwater pearl mussel cDNA library Hyriopsis cumingii cDNA 5' mRNA sequence
21	128	312833361	76.02	13	13	0	4	4	5	Carbamidomethylation; Oxidation (M); Deamidation (NQ)	49649	FPM_M_02365 Mantle of freshwater pearl mussel cDNA library Hyriopsis cumingii cDNA 5' mRNA sequence
21	130	312831732	76.02	12	12	0	4	4	5	Carbamidomethylation; Oxidation (M); Deamidation (NQ)	52675	FPM_M_00469 Mantle of freshwater pearl mussel cDNA library Hyriopsis cumingii cDNA 5' mRNA sequence
21	131	312832586	76.02	12	12	0	4	4	5	Carbamidomethylation; Oxidation (M); Deamidation (NQ)	55911	FPM_M_04713 Mantle of freshwater pearl mussel cDNA library Hyriopsis cumingii cDNA 5' mRNA sequence
21	132	312832926	76.02	12	12	0	4	4	5	Carbamidomethylation; Oxidation (M); Deamidation (NQ)	56430	FPM_M_02985 Mantle of freshwater pearl mussel cDNA library Hyriopsis cumingii cDNA 5' mRNA sequence
17	152	332317720	71.91	8	8	0	3	3	4	Oxidation (HW); Acetylation (K)	43949	FY302080 full-length enriched Mizuhopecten cDNA library Mizuhopecten yessoensis cDNA clone Hotate0129-No27_B02_002 mRNA sequence
20	11	312833463	68.24	25	25	0	4	2	4	Carbamidomethylation; Dihydroxy; Dehydration	34442	FPM_M_02522 Mantle of freshwater pearl mussel cDNA library Hyriopsis cumingii cDNA 5' mRNA sequence
20	12	312835486	68.24	23	23	0	4	2	4	Carbamidomethylation; Dihydroxy; Dehydration	36329	FPM_M_00085 Mantle of freshwater pearl mussel cDNA library Hyriopsis cumingii cDNA 5' mRNA sequence
20	13	312832689	68.24	20	20	0	4	2	4	Carbamidomethylation; Dihydroxy; Dehydration	41757	FPM_M_04920 Mantle of freshwater pearl mussel cDNA library Hyriopsis cumingii cDNA 5' mRNA sequence
22	66	312832075	65.43	14	14	0	3	3	5	Oxidation or Hydroxylation	46074	FPM_M_01132 Mantle of freshwater pearl mussel cDNA library Hyriopsis cumingii cDNA 5' mRNA sequence
22	67	312836598	65.43	14	14	0	3	3	5	Oxidation or Hydroxylation	48383	FPM_M_04755 Mantle of freshwater pearl mussel cDNA library Hyriopsis cumingii cDNA 5' mRNA sequence
22	68	312832625	65.43	14	14	0	3	3	5	Oxidation or Hydroxylation	48717	FPM_M_04752 Mantle of freshwater pearl mussel cDNA library Hyriopsis cumingii cDNA 5' mRNA sequence
22	69	312835948	65.43	13	13	0	3	3	5	Oxidation or Hydroxylation	51338	FPM_M_04048 Mantle of freshwater pearl mussel cDNA library Hyriopsis cumingii cDNA 5' mRNA sequence
22	70	312834649	65.43	13	13	0	3	3	5	Oxidation or Hydroxylation	51008	FPM_M_01495 Mantle of freshwater pearl mussel cDNA library Hyriopsis cumingii cDNA 5' mRNA sequence
22	71	312836560	65.43	12	12	0	3	3	5	Oxidation or Hydroxylation	56953	FPM_M_04507 Mantle of freshwater pearl mussel cDNA library Hyriopsis cumingii cDNA 5' mRNA sequence
19	99	312836115	59.5	9	9	0	3	3	6	Deamidation (NQ); 3-Sulfobenzoic succinimidyl ester	43666	FPM_M_04004 Mantle of freshwater pearl mussel cDNA library Hyriopsis cumingii cDNA 5' mRNA sequence

## Sheet: M. margaritifera AIM_ESTs
Protein Group	Protein ID	Accession	-10lgP	Coverage (%)	Coverage (%) Unionoid Soren AIM	Intensity Unionoid Soren AIM	#Peptides	#Unique	#Spec Unionoid Soren AIM	PTM	Avg. Mass	Description
3	3	312833634	193.97	34	34	0	24	24	41	Amidation; Formylation; Ethylation; O-Diisopropylphosphorylation; Ornithine from Arginine; 2 more	55909	FPM_M_02904 Mantle of freshwater pearl mussel cDNA library Hyriopsis cumingii cDNA 5' mRNA sequence
1	2	312836546	180.61	45	45	0	38	17	74	Acetylation (N-term); Amidation; Carbamylation; Dehydration; Formylation; 13 more	59014	FPM_M_04493 Mantle of freshwater pearl mussel cDNA library Hyriopsis cumingii cDNA 5' mRNA sequence
2	1	312833977	167.19	43	43	0	30	9	57	Acetylation (N-term); Amidation; Carbamylation; Dehydration; Phosphorylation (STY); 5 more	47503	FPM_M_03566 Mantle of freshwater pearl mussel cDNA library Hyriopsis cumingii cDNA 5' mRNA sequence
25	58	312834327	128.07	25	25	0	8	8	9	Oxidation (M); Carbamylation; Hexose (NSY); Methylation(KR); Myristoylation; 3 more	54604	FPM_M_01065 Mantle of freshwater pearl mussel cDNA library Hyriopsis cumingii cDNA 5' mRNA sequence
25	59	312834881	128.07	25	25	0	8	8	9	Oxidation (M); Carbamylation; Hexose (NSY); Methylation(KR); Myristoylation; 3 more	54483	FPM_M_00211 Mantle of freshwater pearl mussel cDNA library Hyriopsis cumingii cDNA 5' mRNA sequence
8	40	312836493	123.46	22	22	0	7	7	18	Carbamidomethylation; Oxidation (M); Deamidation (NQ); Amidation; Tryptophan oxidation to hydroxykynurenin; 3 more	49623	FPM_M_04386 Mantle of freshwater pearl mussel cDNA library Hyriopsis cumingii cDNA 5' mRNA sequence
24	83	312836366	122	17	17	0	9	9	10	Oxidation (HW); Amidation; Dehydration; Phosphorylation (STY); Carboxylation (DKW); Dihydroxy methylglyoxal adduct	51011	FPM_M_04471 Mantle of freshwater pearl mussel cDNA library Hyriopsis cumingii cDNA 5' mRNA sequence
9	49	58307060	118.65	52	52	0	14	3	17	Amidation; Carbamylation; Hexose (NSY); Ethylation; O-Diisopropylphosphorylation; 2 more	40007	AJ624590 Mytilus galloprovincialis haemolymph gills digestive gland foot adductor muscles and mantle Mytilus galloprovincialis cDNA clone GPPD03265 mRNA sequence
23	6	312832713	116.94	35	35	0	7	7	8	Pyro-glu from Q; Deamidation (NQ); Acetylation (N-term); Formylation; Deoxy	48496	FPM_M_04944 Mantle of freshwater pearl mussel cDNA library Hyriopsis cumingii cDNA 5' mRNA sequence
23	7	312836013	116.94	33	33	0	7	7	8	Pyro-glu from Q; Deamidation (NQ); Acetylation (N-term); Formylation; Deoxy	52174	FPM_M_03902 Mantle of freshwater pearl mussel cDNA library Hyriopsis cumingii cDNA 5' mRNA sequence
23	8	312832862	116.94	32	32	0	7	7	8	Pyro-glu from Q; Deamidation (NQ); Acetylation (N-term); Formylation; Deoxy	52796	FPM_M_02867 Mantle of freshwater pearl mussel cDNA library Hyriopsis cumingii cDNA 5' mRNA sequence
23	9	312835892	116.94	30	30	0	7	7	8	Pyro-glu from Q; Deamidation (NQ); Acetylation (N-term); Formylation; Deoxy	57387	FPM_M_03777 Mantle of freshwater pearl mussel cDNA library Hyriopsis cumingii cDNA 5' mRNA sequence
5	32	312833442	112.95	30	30	0	7	2	26	Deamidation (NQ); Dihydroxy; Formation of five membered aromatic heterocycle	50554	FPM_M_02501 Mantle of freshwater pearl mussel cDNA library Hyriopsis cumingii cDNA 5' mRNA sequence
14	57	312832411	112.71	36	36	0	6	6	9	Methylation(KR); Methylation(C-term); Methylation(others); Ornithine from Arginine; Dihydroxy	40620	FPM_M_01783 Mantle of freshwater pearl mussel cDNA library Hyriopsis cumingii cDNA 5' mRNA sequence
6	47	58307798	110.22	33	33	0	14	7	19	Acetylation (N-term); Amidation; Carbamylation; Sodium adduct; Diethylation	41224	AJ625328 Mytilus galloprovincialis haemolymph gills digestive gland foot adductor muscles and mantle Mytilus galloprovincialis cDNA clone GPPD04251 mRNA sequence
7	71	312833630	100.05	14	14	0	6	6	12	Carboxyl modification with ethanolamine; Replacement of proton with ammonium ion	58700	FPM_M_02900 Mantle of freshwater pearl mussel cDNA library Hyriopsis cumingii cDNA 5' mRNA sequence
28	42	312834843	83.04	16	16	0	5	5	5	Carbamidomethylation; Pyro-glu from Q; Oxidation (M); Methylation(KR)	55085	FPM_M_01707 Mantle of freshwater pearl mussel cDNA library Hyriopsis cumingii cDNA 5' mRNA sequence
29	44	312836115	61.17	6	6	0	2	2	6	Deamidation (NQ); Oxidation to nitro	43666	FPM_M_04004 Mantle of freshwater pearl mussel cDNA library Hyriopsis cumingii cDNA 5' mRNA sequence
29	45	312832416	61.17	6	6	0	2	2	6	Deamidation (NQ); Oxidation to nitro	42816	FPM_M_01840 Mantle of freshwater pearl mussel cDNA library Hyriopsis cumingii cDNA 5' mRNA sequence

## Sheet: P. auricularius ASM_ESTs
Protein Group	Protein ID	Accession	-10lgP	Coverage (%)	Coverage (%) Margaritifera auricularia	Intensity Margaritifera auricularia	#Peptides	#Unique	#Spec Margaritifera auricularia	PTM	Avg. Mass	Description
1	14	312833634	212.39	49	49	6910000000	31	31	174	Acetylation (K); Amidation; Formylation; Hexose (NSY); Guanidination; 13 more	55909	FPM_M_02904 Mantle of freshwater pearl mussel cDNA library Hyriopsis cumingii cDNA 5' mRNA sequence
7	2	312835716	199.62	31	31	13600000	29	3	90	Carbamidomethylation; Oxidation (HW); Deamidation (NQ); Phosphorylation (STY); Acetylation (K); 9 more	56963	FPM_M_02644 Mantle of freshwater pearl mussel cDNA library Hyriopsis cumingii cDNA 5' mRNA sequence
9	1	312836432	193.81	40	40	24700000	26	3	83	Carbamidomethylation; Oxidation (HW); Deamidation (NQ); Phosphorylation (STY); Acetylation (K); 8 more	52862	FPM_M_04325 Mantle of freshwater pearl mussel cDNA library Hyriopsis cumingii cDNA 5' mRNA sequence
15	15	262319994	166.7	62	62	128000000	28	9	40	Deamidation (NQ); Phosphorylation (STY); Amidation; Carbamylation; Dehydration; 12 more	52957	pmaximaP0013J08_670 Adult silver lipped oyster (Pinctada maxima) Pinctada maxima cDNA 5' mRNA sequence
27	46	212831670	129.37	53	53	154000000	17	15	28	Acetylation (N-term); Hexose (NSY); Methylation(others); Sodium adduct; Carboxymethyl (KW X@N-term); 5 more	66753	MUW12-F11.x1d-t SHGC-MUW Mytilus californianus cDNA 5' mRNA sequence
28	20	262320326	126.43	26	26	369000000	9	2	28	Dehydration; Carboxylation (DKW); Ornithine from Arginine; Dihydroxy; Deoxy	51076	pmaximaP0014F13_647 Adult silver lipped oyster (Pinctada maxima) Pinctada maxima cDNA 5' mRNA sequence
4	82	121464063	107.93	21	21	808000000	11	11	44	Carbamidomethylation; Carbamylation; Ubiquitin; Oxidation or Hydroxylation; Benzoyl; 2 more	52788	CNSN01-F-150008-501 Normalized CNS library (juvenile 1) Aplysia californica cDNA clone CNSN01-F-150008 5' mRNA sequence
91	16	312835451	103.85	19	19	182000000	6	6	14	Oxidation (HW); Oxidation (M); Deamidation (NQ); Acetylation (K); Acetylation (N-term); Menadione quinone derivative	47210	FPM_M_00050 Mantle of freshwater pearl mussel cDNA library Hyriopsis cumingii cDNA 5' mRNA sequence
76	30	121459237	103.42	19	19	29900000	7	5	18	Carbamidomethylation; Amidation; Carbamylation; Replacement of proton by potassium; O-Ethylphosphorylation	50186	CNSN01-F-143546-501 Normalized CNS library (juvenile 1) Aplysia californica cDNA clone CNSN01-F-143546 5' mRNA sequence
92	49	218926993	85.1	14	14	181000000	3	3	14	Carbamidomethylation; Carboxylation (DKW); Levuglandinyl-lysine anhyropyrrole adduct	33758	RM_G_01806 hemocytes of freshwater pearl mussel cDNA Library Hyriopsis cumingii cDNA 5' mRNA sequence

## Sheet: P. auricularius AIM_ESTs
Protein Group	Protein ID	Accession	-10lgP	Coverage (%)	Coverage (%) Margaritifera Auricularia AIM	Intensity Margaritifera Auricularia AIM	#Peptides	#Unique	#Spec Margaritifera Auricularia AIM	PTM	Avg. Mass	Description
3	14	312835716	207.06	27	27	22800000	37	2	479	Carbamidomethylation; Deamidation (NQ); Acetylation (K); Acetylation (N-term); Carbamylation; 12 more	56963	FPM_M_02644 Mantle of freshwater pearl mussel cDNA library Hyriopsis cumingii cDNA 5' mRNA sequence
15	74	312834881	200.66	48	48	72400000	49	22	109	Deamidation (NQ); Acetylation (K); Acetylation (N-term); Amidation; Carbamylation; 13 more	54483	FPM_M_00211 Mantle of freshwater pearl mussel cDNA library Hyriopsis cumingii cDNA 5' mRNA sequence
4	80	312836432	200.4	21	21	58700000	32	8	424	Carbamidomethylation; Deamidation (NQ); Acetylation (K); Acetylation (N-term); Amidation; 8 more	52862	FPM_M_04325 Mantle of freshwater pearl mussel cDNA library Hyriopsis cumingii cDNA 5' mRNA sequence
5	1	312833634	199.44	53	53	4620000000	51	24	145	Deamidation (NQ); Acetylation (K); Amidation; Carbamylation; Formylation; 10 more	55909	FPM_M_02904 Mantle of freshwater pearl mussel cDNA library Hyriopsis cumingii cDNA 5' mRNA sequence
20	62	262319994	177.69	80	80	109000000	52	13	90	Carbamidomethylation; Oxidation (HW); Acetylation (N-term); Amidation; Biotinylation; 17 more	52957	pmaximaP0013J08_670 Adult silver lipped oyster (Pinctada maxima) Pinctada maxima cDNA 5' mRNA sequence
18	75	262326456	163.49	42	42	141000000	35	8	99	Amidation; Carbamylation; Dehydration; Formylation; Methylation(KR); 15 more	59909	pmaximaP0021G15_757 Adult silver lipped oyster (Pinctada maxima) Pinctada maxima cDNA 5' mRNA sequence
36	3	312833977	163.03	58	58	384000000	32	23	49	Carbamidomethylation; Acetylation (N-term); Amidation; Carbamylation; Dehydration; 11 more	47503	FPM_M_03566 Mantle of freshwater pearl mussel cDNA library Hyriopsis cumingii cDNA 5' mRNA sequence
28	89	212817091	162.88	33	33	26100000	34	2	69	Acetylation (N-term); Amidation; Carbamylation; Formylation; Methylation(KR); 9 more	75929	MUS14-E12.y1d-s SHGC-MUS Mytilus californianus cDNA 3' mRNA sequence
28	90	212814500	162.88	31	31	26100000	34	2	69	Acetylation (N-term); Amidation; Carbamylation; Formylation; Methylation(KR); 9 more	80197	MUS20-K08.y1d-s SHGC-MUS Mytilus californianus cDNA 3' mRNA sequence
21	76	262319601	155.98	37	37	26800000	27	3	92	Amidation; Carbamylation; Formylation; Methylation(KR); Ammonia-loss (Protein N-term); 11 more	42263	pmaximaP0011D23_540 Adult silver lipped oyster (Pinctada maxima) Pinctada maxima cDNA 5' mRNA sequence
31	11	212831670	148.81	58	58	113000000	26	9	67	Phosphorylation (STY); Acetylation (N-term); Carbamylation; Carboxylation (E); Methylation(KR); 13 more	66753	MUW12-F11.x1d-t SHGC-MUW Mytilus californianus cDNA 5' mRNA sequence
39	81	262320326	143.83	27	27	179000000	21	3	39	Acetylation (N-term); Amidation; Carbamylation; Dehydration; Formylation; 7 more	51076	pmaximaP0014F13_647 Adult silver lipped oyster (Pinctada maxima) Pinctada maxima cDNA 5' mRNA sequence
44	2	212830777	135.21	50	50	42600000	20	3	41	Phosphorylation (STY); Acetylation (N-term); Carboxylation (E); Methylation(C-term); Sodium adduct; 7 more	64331	MUW02-L23.x1d-t SHGC-MUW Mytilus californianus cDNA 5' mRNA sequence
35	122	260748438	134.26	32	32	173000000	22	20	45	Carbamidomethylation; Deamidation (NQ); Acetylation (N-term); Carbamylation; Dimethylation(KR); 9 more	89803	CU999233 Pascal Favrel cDNA library hemocyte (wy0aba) Crassostrea gigas cDNA clone wy0aba12e15 mRNA sequence
74	4	312836546	133.56	57	57	132000000	17	11	20	Pyro-glu from E; Acetylation (N-term); Formylation; Hexose (NSY); Methylation(C-term); 4 more	59014	FPM_M_04493 Mantle of freshwater pearl mussel cDNA library Hyriopsis cumingii cDNA 5' mRNA sequence
45	78	262319165	131.8	63	63	95400000	19	18	42	Deamidation (NQ); Phosphorylation (STY); Acetylation (N-term); Amidation; Dehydration; 8 more	37413	pmaximaP0006D09_471 Adult silver lipped oyster (Pinctada maxima) Pinctada maxima cDNA 5' mRNA sequence
59	9	194265046	116.56	18	18	114000000	12	12	24	Carbamidomethylation; Deamidation (NQ); Phosphorylation (STY); Carbamylation; Dehydration; 5 more	75499	pl_040-C6 Ilyanassa (snail) 0-48h Ilyanassa obsoleta cDNA 5' mRNA sequence
65	133	313281399	95.58	11	11	29200000	6	6	18	Amidation; Ubiquitin; Ethylation; Aminoethylcysteine	54205	CCBN11113.b1 CCBN Crassostrea gigas mixed adult tissues library 2 normalized Crassostrea gigas cDNA clone CCBN11113 5' mRNA sequence
65	134	313275353	95.58	11	11	29200000	6	6	18	Amidation; Ubiquitin; Ethylation; Aminoethylcysteine	55675	CCBN9373.b1 CCBN Crassostrea gigas mixed adult tissues library 2 normalized Crassostrea gigas cDNA clone CCBN9373 5' mRNA sequence
65	135	313285069	95.58	11	11	29200000	6	6	18	Amidation; Ubiquitin; Ethylation; Aminoethylcysteine	55907	CCBN10810.b1 CCBN Crassostrea gigas mixed adult tissues library 2 normalized Crassostrea gigas cDNA clone CCBN10810 5' mRNA sequence
65	136	313314127	95.58	10	10	29200000	6	6	18	Amidation; Ubiquitin; Ethylation; Aminoethylcysteine	59782	CCTP588.b1 CCTP Crassostrea gigas mixed adult tissues library 3 normalized Crassostrea gigas cDNA clone CCTP588 5' mRNA sequence
65	137	313293775	95.58	10	10	29200000	6	6	18	Amidation; Ubiquitin; Ethylation; Aminoethylcysteine	60846	CCBN18188.b1 CCBN Crassostrea gigas mixed adult tissues library 2 normalized Crassostrea gigas cDNA clone CCBN18188 5' mRNA sequence
54	10	312836493	90.09	18	18	269000000	8	8	20	Oxidation (HW); Oxidation (M); Deamidation (NQ); Phosphorylation (STY); Amidation; Sulphone	49623	FPM_M_04386 Mantle of freshwater pearl mussel cDNA library Hyriopsis cumingii cDNA 5' mRNA sequence
992	111	312831970	46.27	6	6	3420000	2	2	2	Carbamidomethylation; Deamidation (NQ)	51142	FPM_M_00922 Mantle of freshwater pearl mussel cDNA library Hyriopsis cumingii cDNA 5' mRNA sequence
165	230	121471512	40.87	5	5	36300000	2	2	4		54761	CNSN01-F-087071-501 Normalized CNS library (juvenile 1) Aplysia californica cDNA clone CNSN01-F-087071 5' mRNA sequence

## Sheet: M. modiolus ASM_ESTs
Protein Group	Protein ID	Accession	-10lgP	Coverage (%)	Coverage (%) Sample 1	Intensity Sample 1	#Peptides	#Unique	#Spec Sample 1	PTM	Avg. Mass	Description
1	158	171869820	177.18	20	20	0	10	10	15	Deamidation (NQ); Carbamylation; Glycidamide adduct; Biotinylation; Carboxymethyl (KW X@N-term); 5 more	55628	G1045P338RC14.T0 Aplysia californica Pooled Normalized Library Aplysia californica cDNA mRNA sequence
11	13	262327552	141.82	43	43	0	6	4	6	Carbamylation; Dimethylation(KR); Dehydration; Decanoyl	28592	pmaximaP0023F09_360 Adult silver lipped oyster (Pinctada maxima) Pinctada maxima cDNA 5' mRNA sequence
9	109	212830777	137.61	32	32	0	7	5	7	Carbamylation; Glycidamide adduct; Methylation(KR); Dehydration; Formylation; 2 more	64331	MUW02-L23.x1d-t SHGC-MUW Mytilus californianus cDNA 5' mRNA sequence
4	7	262327333	132.72	29	29	0	8	3	8	Deamidation (NQ); Glycidamide adduct; Hexose (NSY); Acetylation (N-term)	40936	pmaximaP0007G07_509 Adult silver lipped oyster (Pinctada maxima) Pinctada maxima cDNA 5' mRNA sequence
3	350	152015011	127.96	26	26	0	9	9	9	Oxidation (HW); Methylation(KR); Dihydroxy; Amidation; Sodium adduct	69270	BW985987 5' enriched Physa acuta whole body cDNA library Physella acuta cDNA clone Physa0768 5' mRNA sequence
5	8	262327125	126.77	31	31	0	9	3	10	Carbamidomethylation; Deamidation (NQ); Glycidamide adduct; Phosphorylation (STY); Dihydroxy; 2 more	52251	pmaximaP0006J08_661 Adult silver lipped oyster (Pinctada maxima) Pinctada maxima cDNA 5' mRNA sequence
6	6	262319165	124.68	44	44	0	8	2	8	Deamidation (NQ); Dimethylation(KR); Glycidamide adduct; Hexose (NSY); Acetylation (N-term)	37413	pmaximaP0006D09_471 Adult silver lipped oyster (Pinctada maxima) Pinctada maxima cDNA 5' mRNA sequence
2	154	212814806	110.54	14	14	0	6	6	8	Carbamidomethylation; Deamidation (NQ); Carbamylation; Dihydroxy; Amidation; Sodium adduct	54419	MUS20-C19.x1d-t SHGC-MUS Mytilus californianus cDNA 5' mRNA sequence

[truncated: 10 more sheets: M. modiolus AIM_ESTs, O. edulis ASM_ESTs, O. edulis AIM_ESTs, HavA (ASM+AIM) ESTs, HavB (ASM+AIM) ESTs, HavC (ASM+AIM) ESTs, HorA (ASM+AIM) ESTs, HorB (ASM+AIM) ESTs, HorC (ASM+AIM) ESTs, PesB (ASM+AIM) ESTs]
