# Supplementary figures and images for: 'Palaeoshellomics’ reveals the use of freshwater mother-of-pearl in prehistory
Source: eLife journal article supplement (doi:10.7554/elife.45644), 2019-05-06

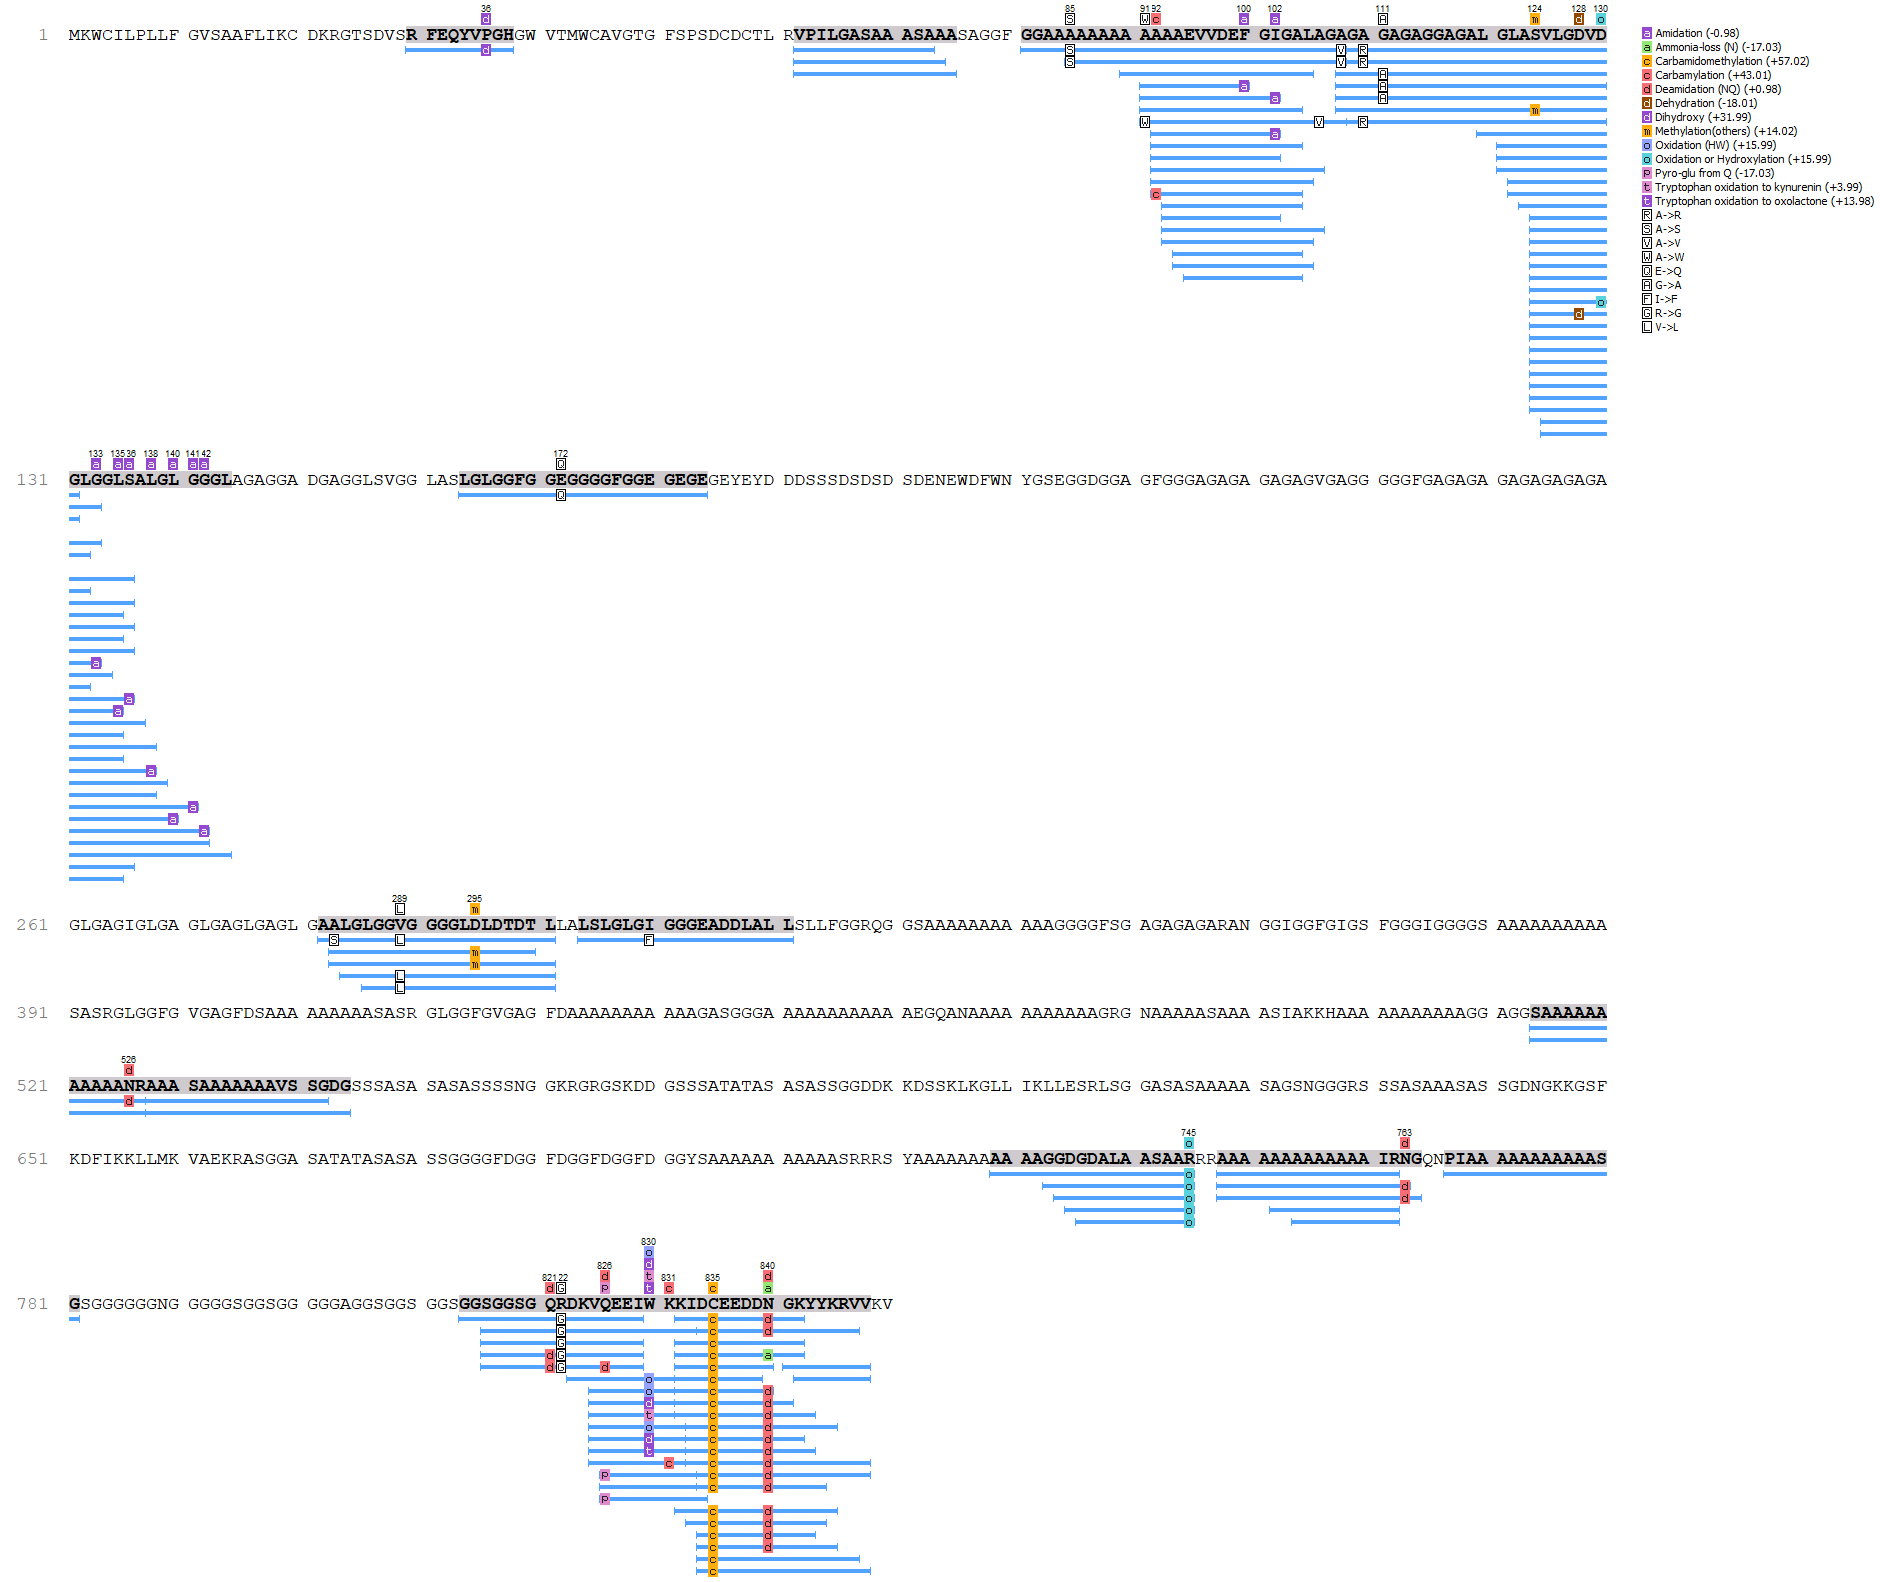

Supplement: supp [file elife-45644-supp-v1.zip › elife_poa_e45644_Figure_6_figure_supplement_6.png]

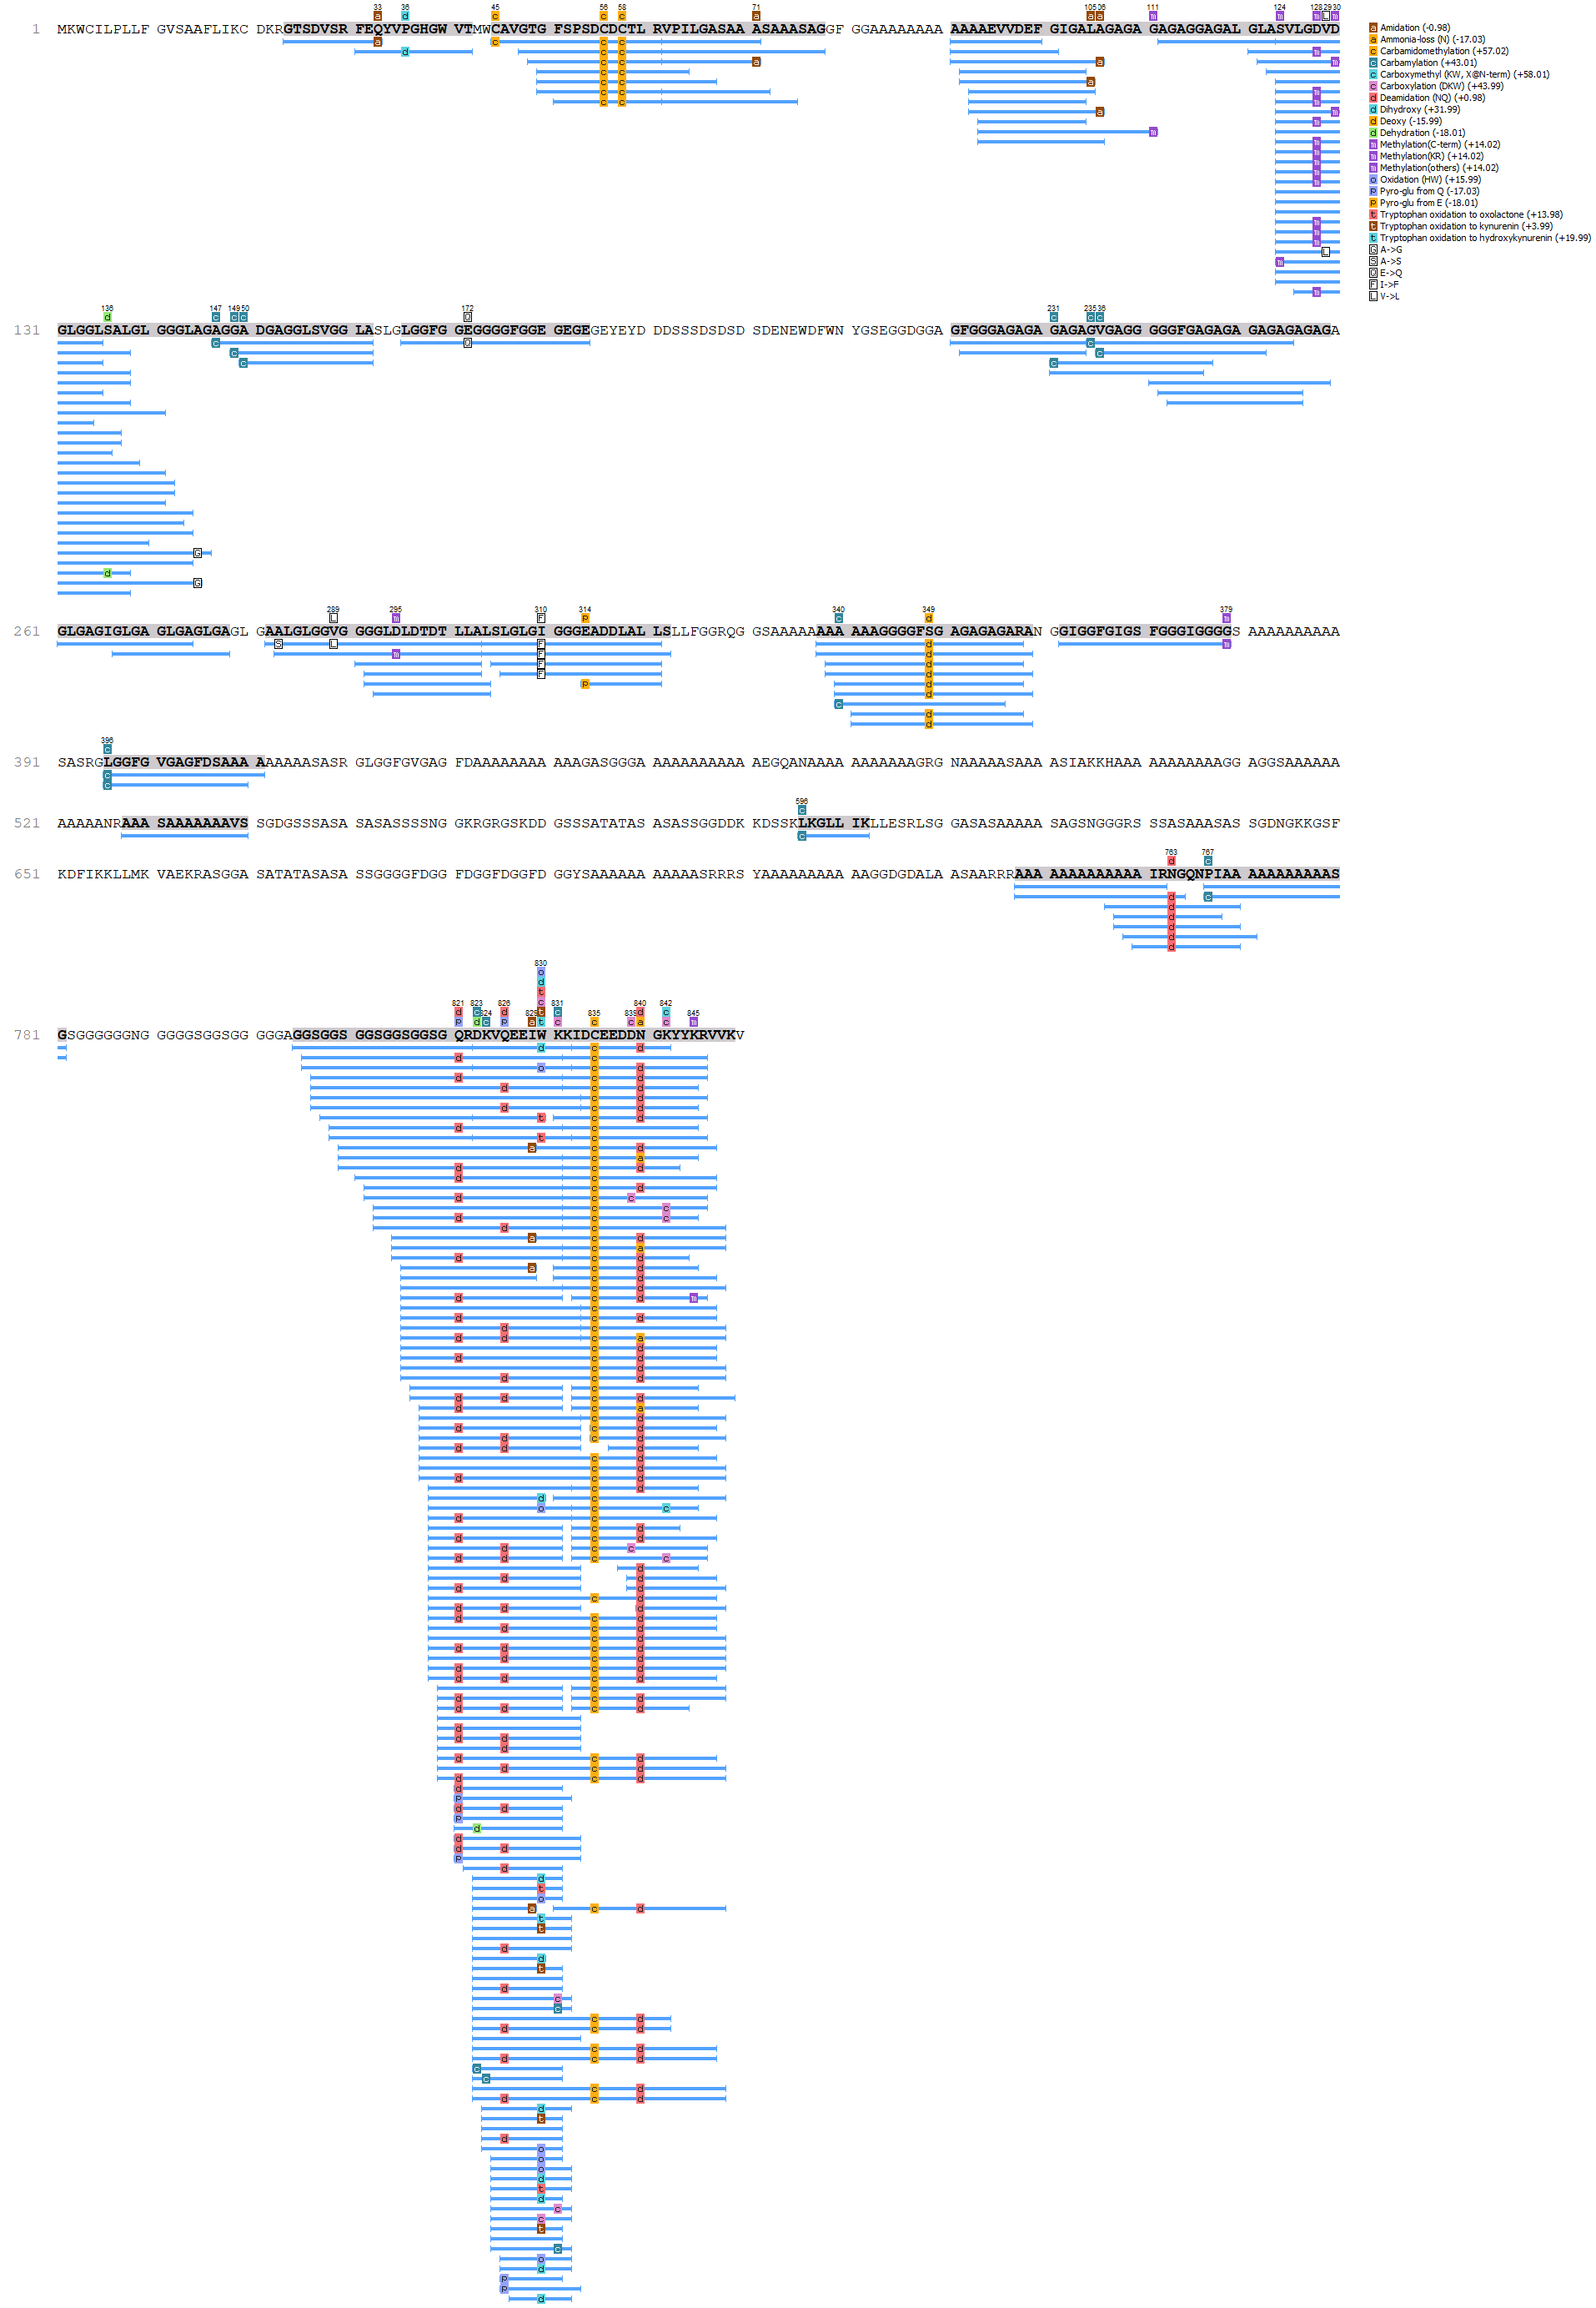

Supplement: supp [file elife-45644-supp-v1.zip › elife_poa_e45644_Figure_6_figure_supplement_1.png]

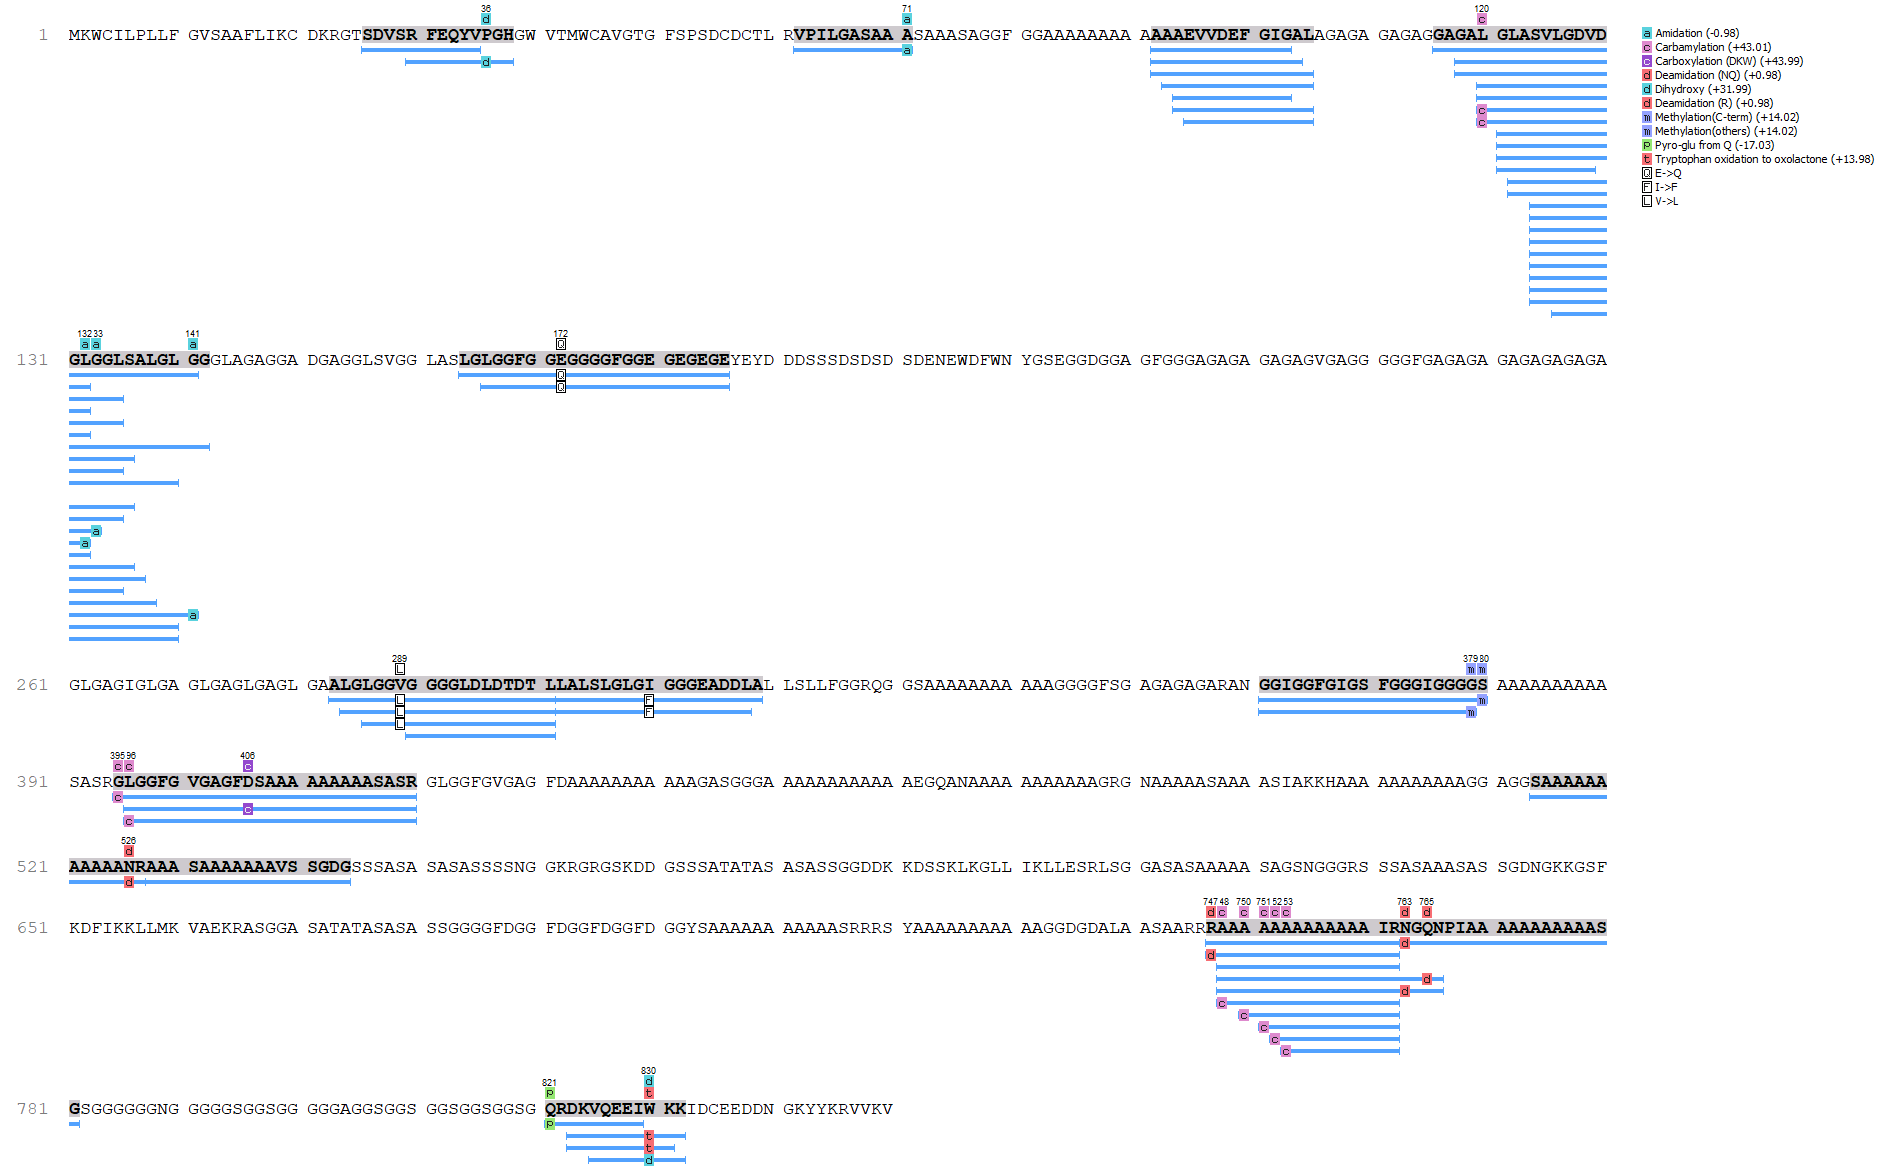

Supplement: supp [file elife-45644-supp-v1.zip › elife_poa_e45644_Figure_6_figure_supplement_3.png]

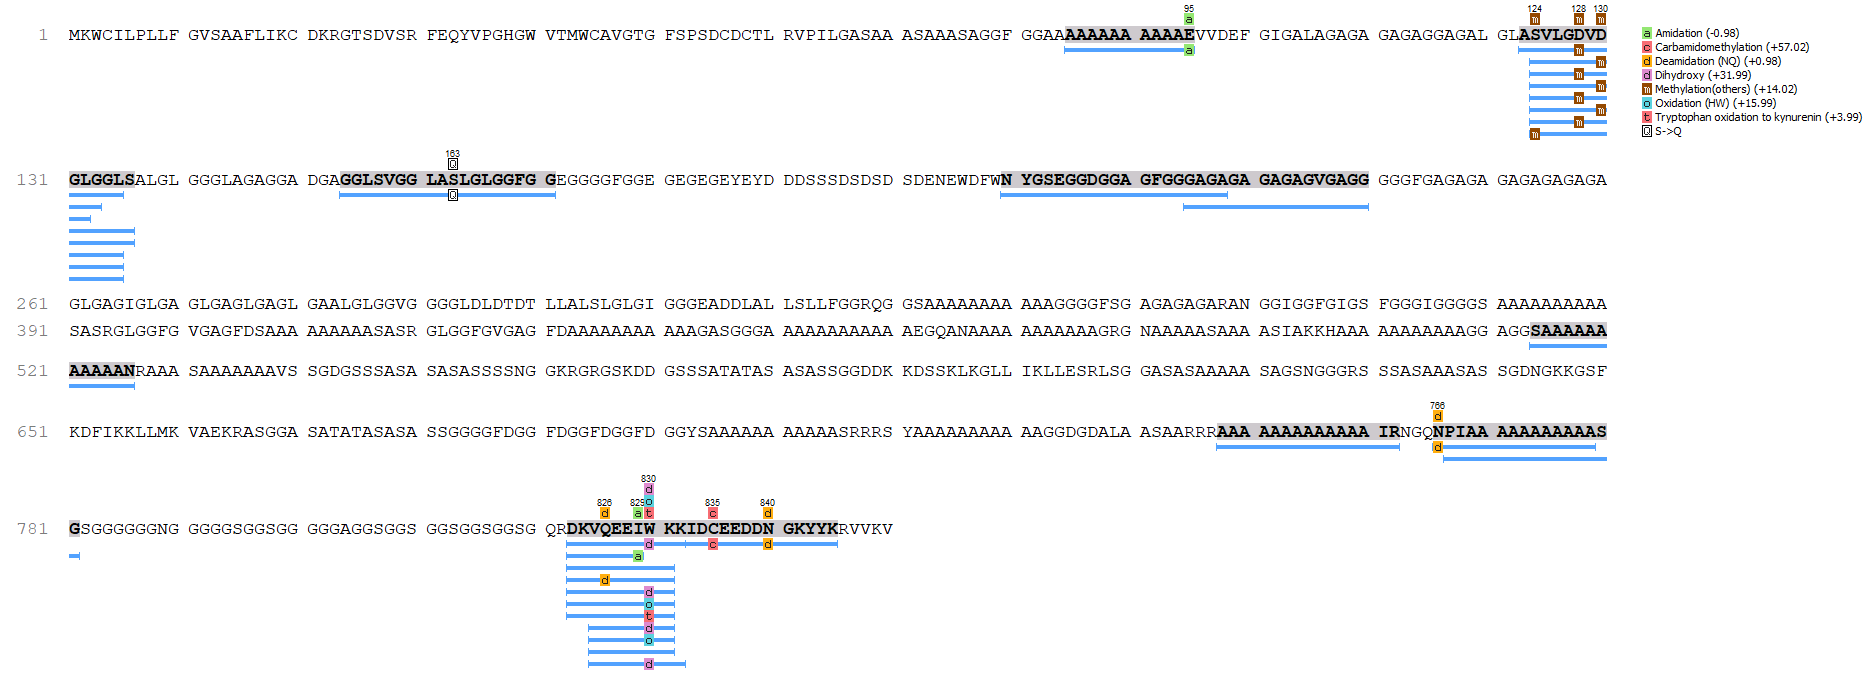

Supplement: supp [file elife-45644-supp-v1.zip › elife_poa_e45644_Figure_6_figure_supplement_5.png]

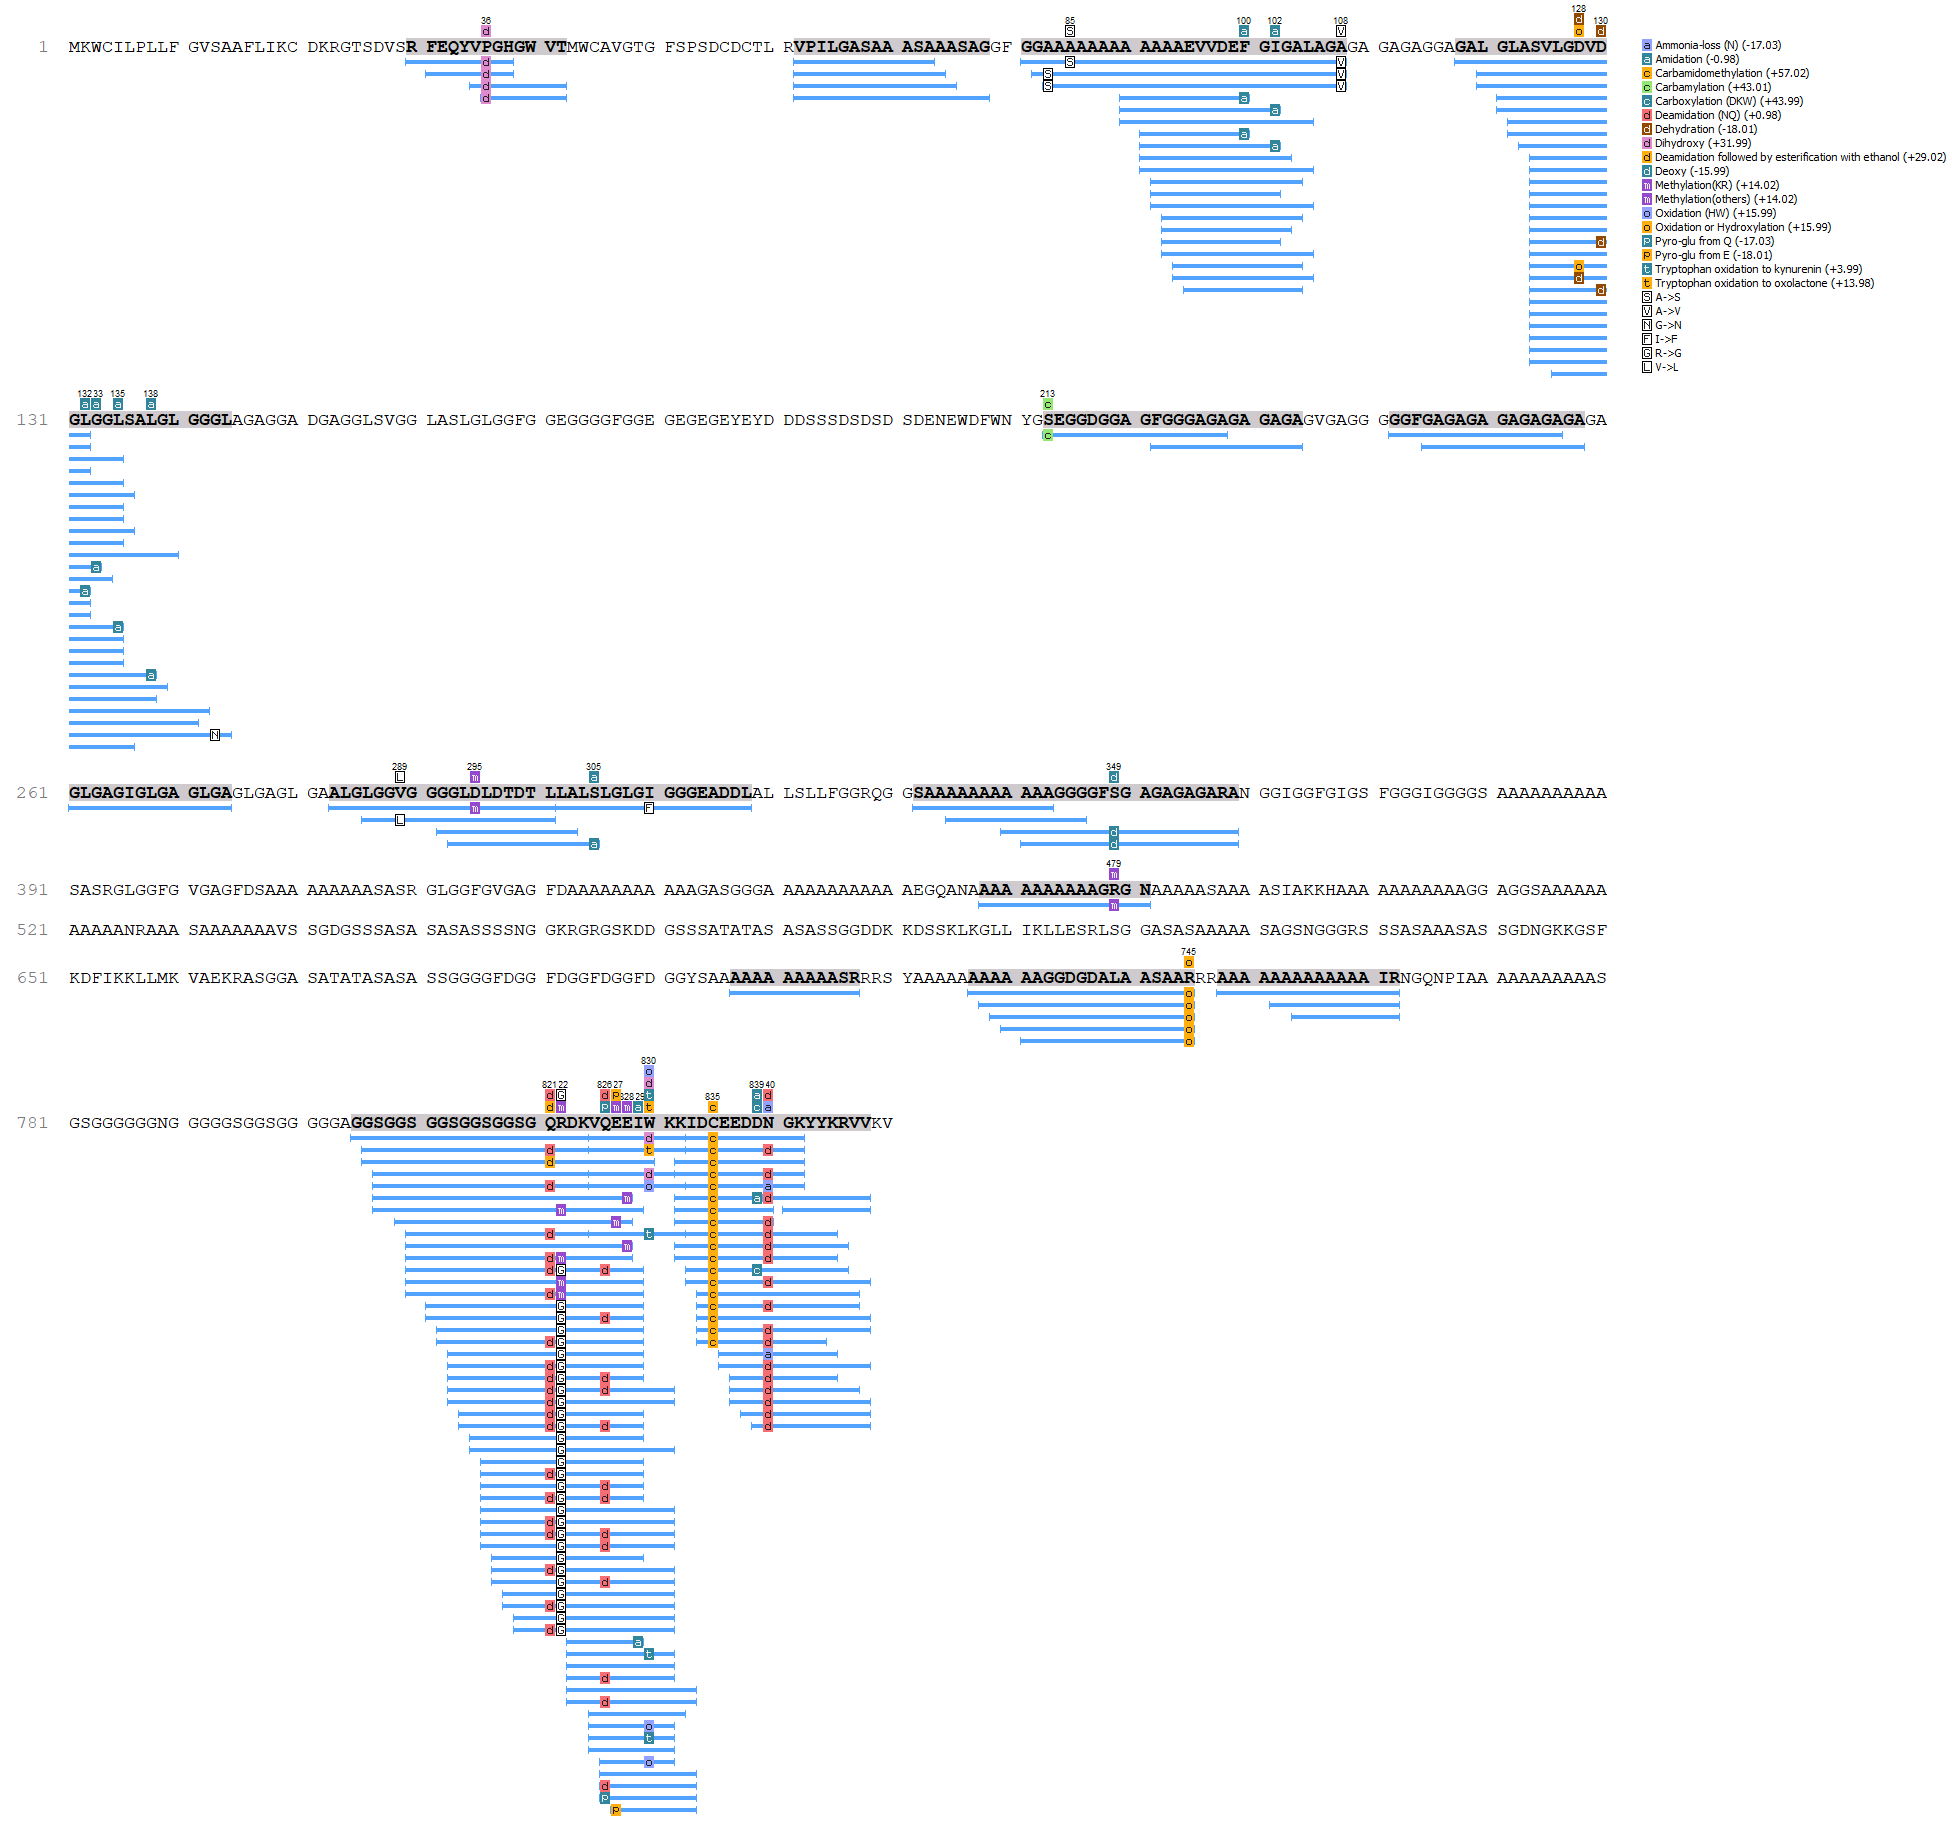

Supplement: supp [file elife-45644-supp-v1.zip › elife_poa_e45644_Figure_6_figure_supplement_7.png]

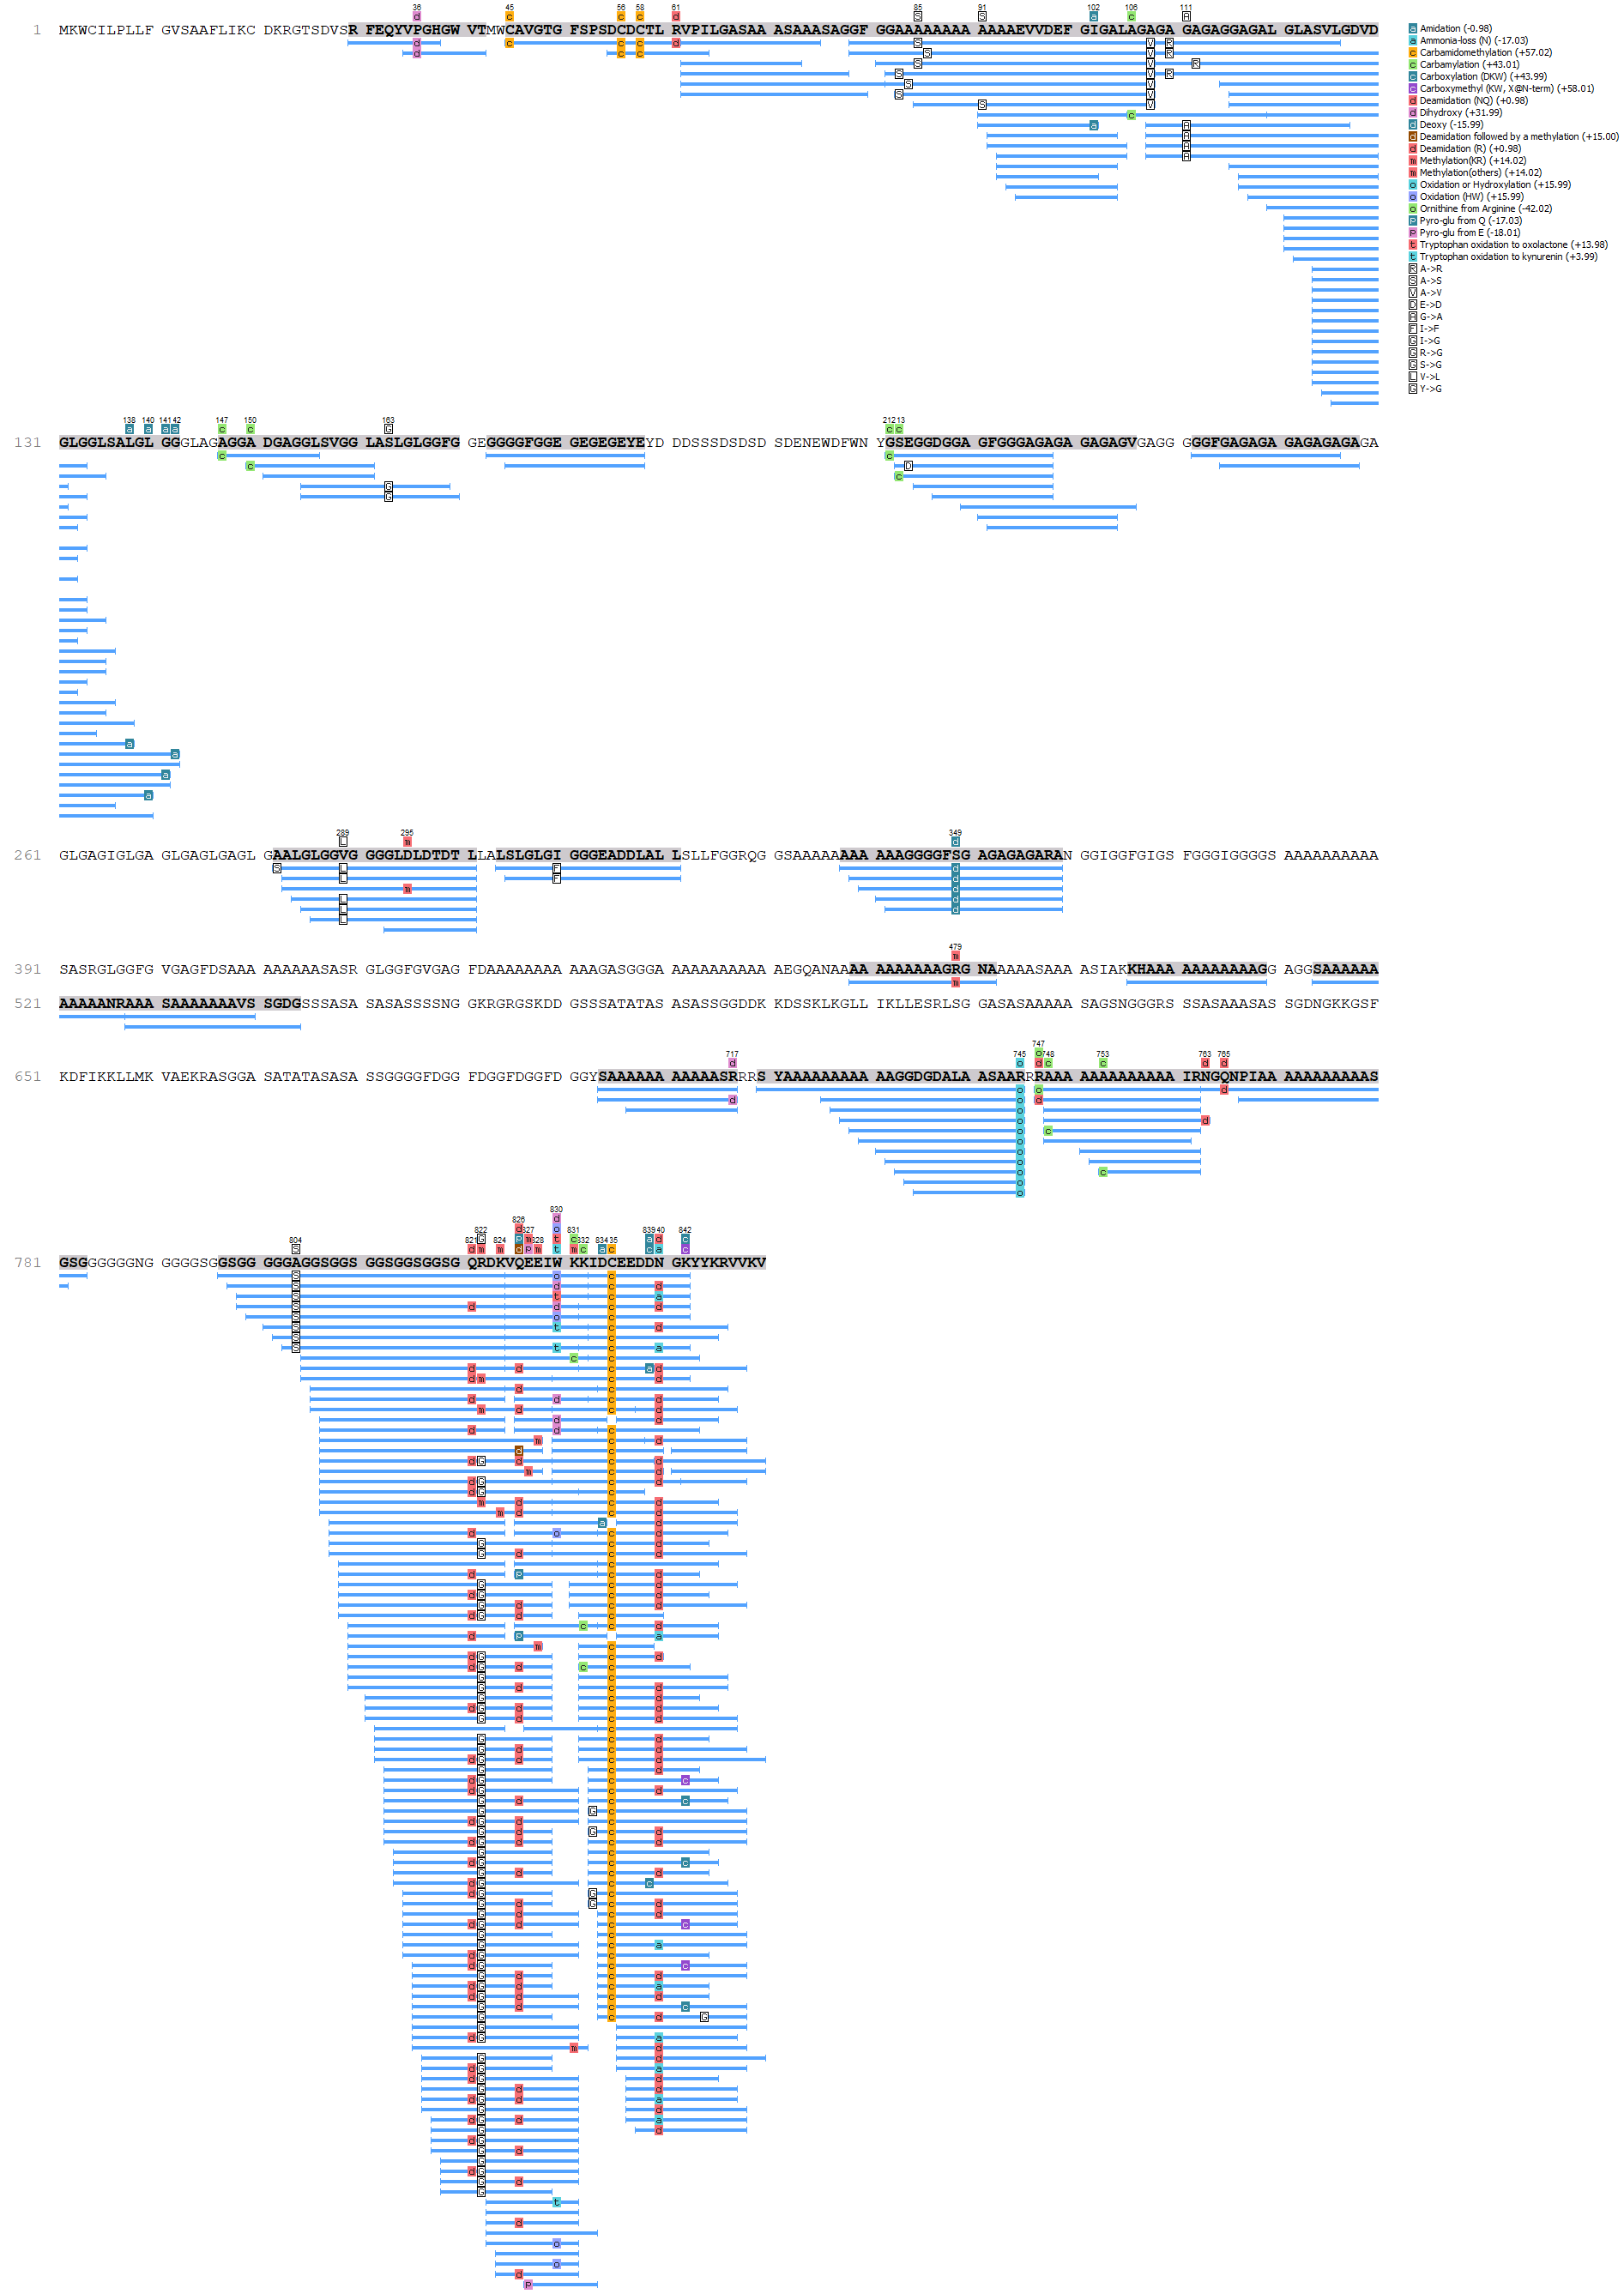

Supplement: supp [file elife-45644-supp-v1.zip › elife_poa_e45644_Figure_6_figure_supplement_8.png]

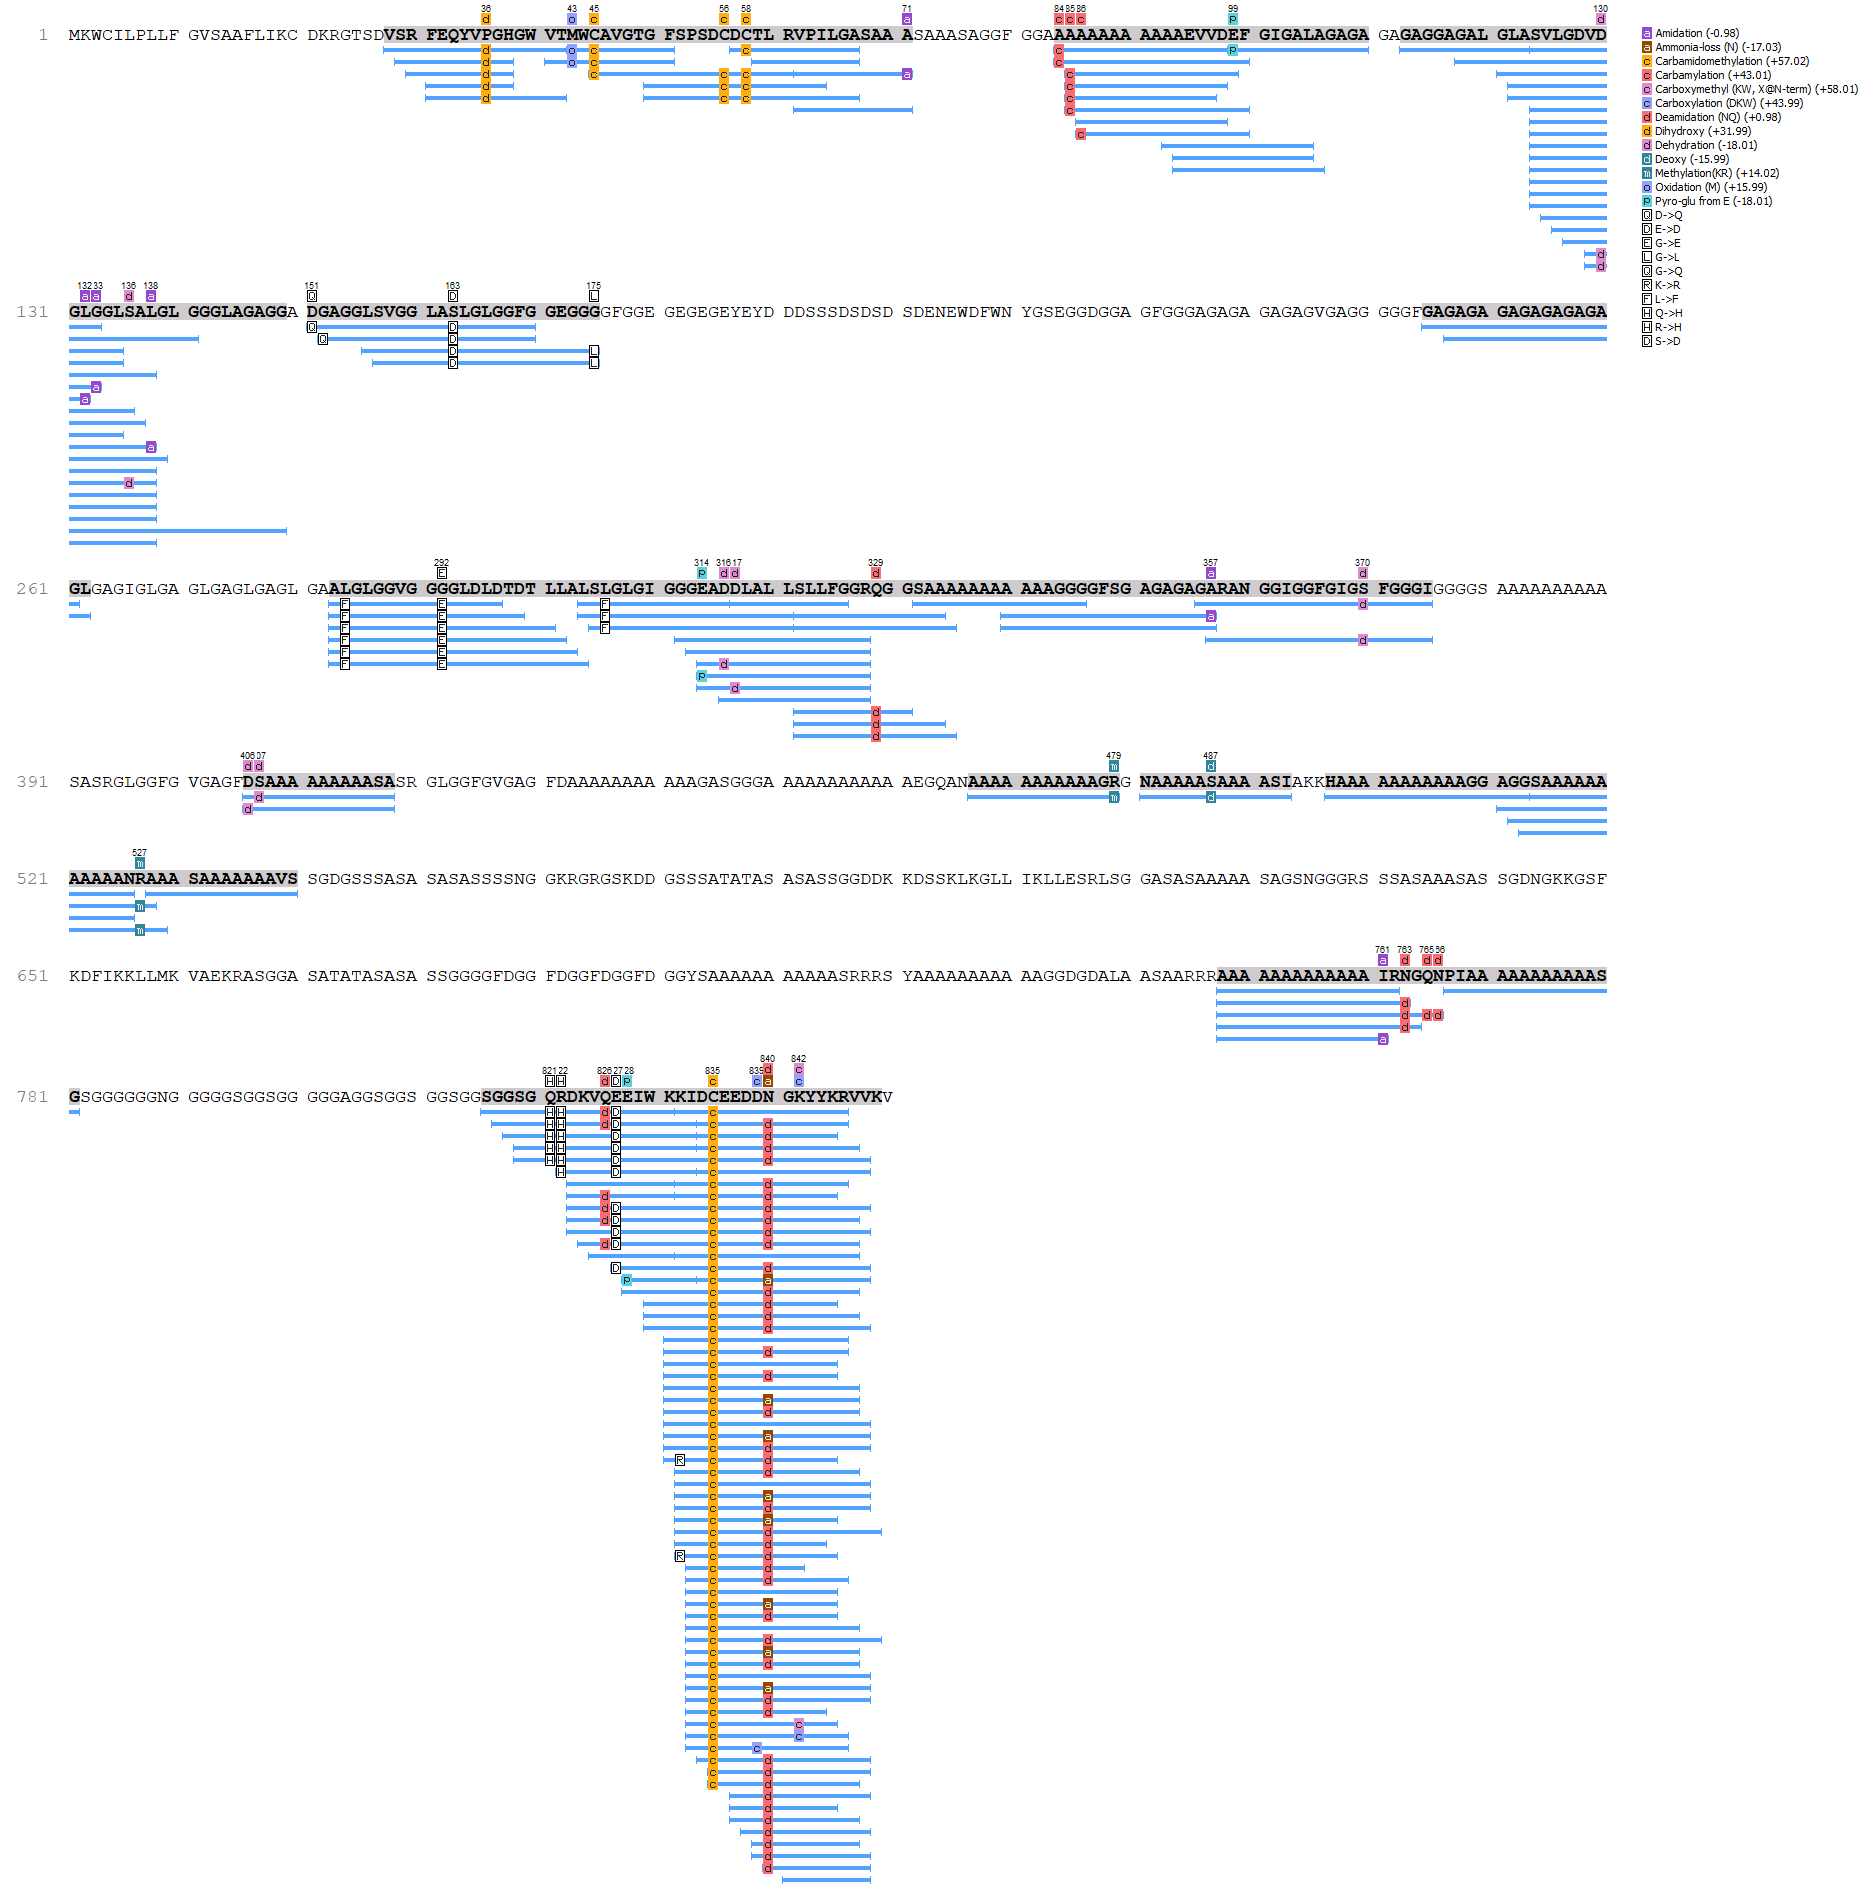

Supplement: supp [file elife-45644-supp-v1.zip › elife_poa_e45644_Figure_6_figure_supplement_4.png]

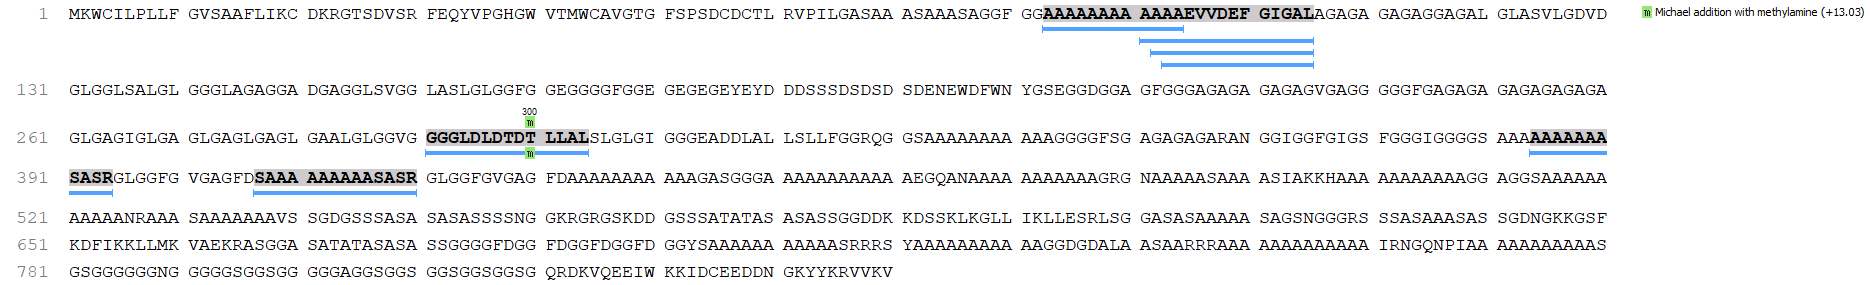

Supplement: supp [file elife-45644-supp-v1.zip › elife_poa_e45644_Figure_6_figure_supplement_10.png]

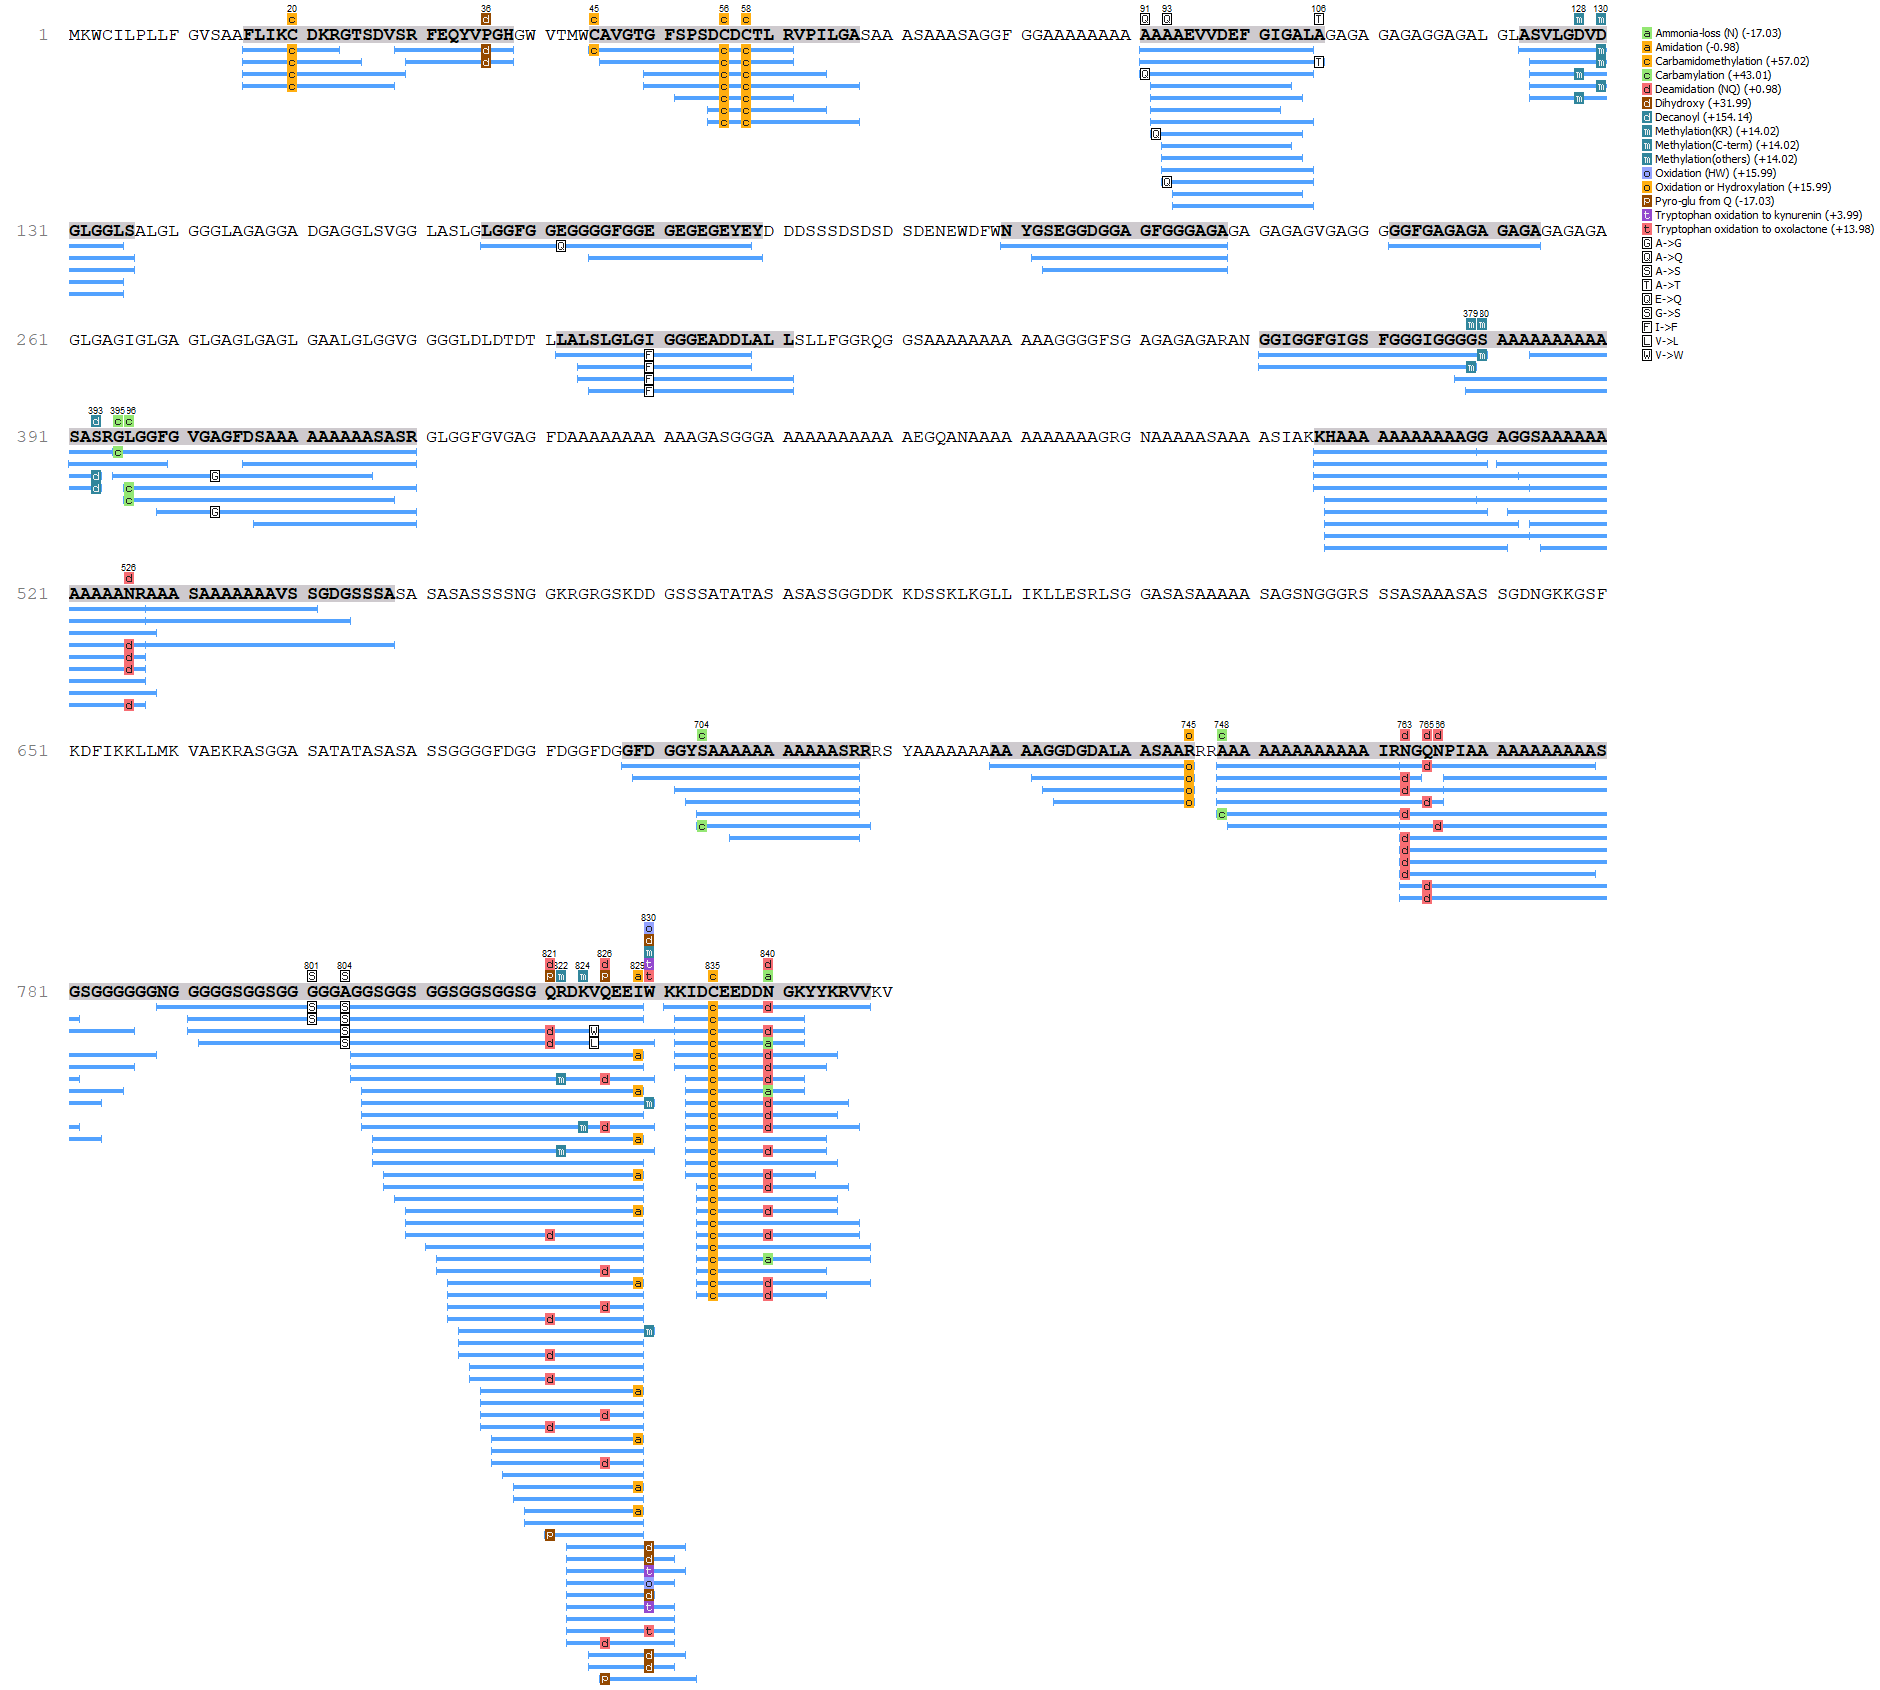

Supplement: supp [file elife-45644-supp-v1.zip › elife_poa_e45644_Figure_6_figure_supplement_2.png]

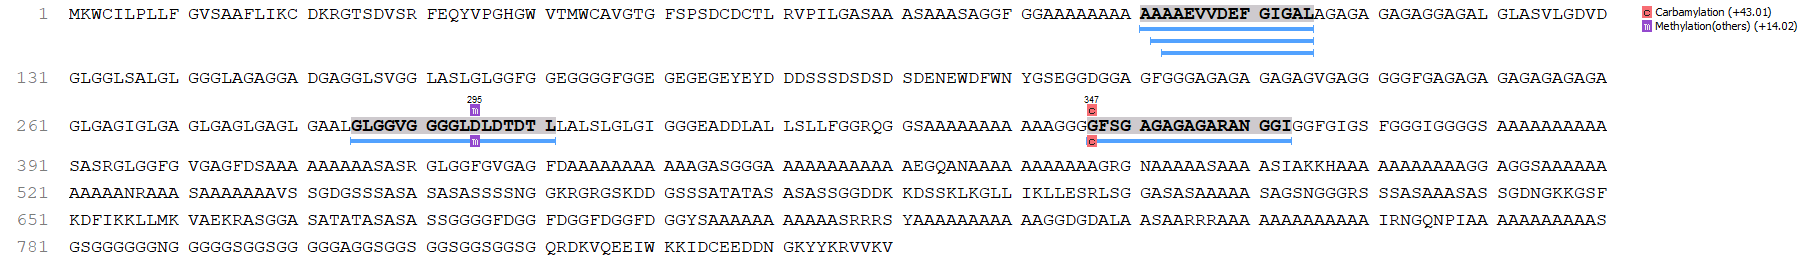

Supplement: supp [file elife-45644-supp-v1.zip › elife_poa_e45644_Figure_6_figure_supplement_9.png]
